# Supplementary material
Source: publisher figshare collection journal article supplement (https://acs.figshare.com/ndownloader/files/3733288)
Supplement: Supplementary file 1 [file 3733288]

data_4
_audit_creation_date              2015-08-14
_audit_creation_method
;
Olex2 1.2
(compiled 2015.01.26 svn.r3150 for OlexSys, GUI svn.r4998)
;
_publ_requested_journal          Organometallics
_publ_contact_author_name        'Prof. Peter Junk'
_publ_contact_author_address     
;College of Science
Technology & Engineering
James Cook University 
Townsville, Qld 4811 
Australia
;
_publ_contact_author_email       peter.junk@jcu.edu.au
_publ_contact_author_phone       +61747814433
loop_
_publ_author_name
_publ_author_address
'Junk, P. C.'
;College of Science
Technology & Engineering
James Cook University 
Townsville, Qld 4811 
Australia
;
'Bell, T. D. M.'
;
School of Chemistry
Faculty of Science
Monash University
Clayton 3800
Australia
;
'Cox, R. P.'
;
School of Chemistry
Faculty of Science
Monash University
Clayton 3800
Australia
;
'Daniels, D. P.'
;
School of Chemistry
Faculty of Science
Monash University
Clayton 3800
Australia
;
'Deacon, G. B.'
;
School of Chemistry
Faculty of Science
Monash University
Clayton 3800
Australia
;
'Jaroschik, F.'
;
Institut de Chimie Mol\'eculaire de Reims
UMR CNRS 7312
Case postale 44
UFR des Sciences Exactes et Naturelles
BP 1039
51687 Reims Cedex 2
France
;
'Kelly, R. P.'
;
School of Chemistry
Faculty of Science
Monash University
Clayton 3800
Australia
;
'Le Goff, X. F.'
;
Laboratoire 'H\'et\'ero\'el\'ements et Coordination'
Ecole Polytechnique and CNRS
91128 Palaiseau Cedex
France
;
'Lemercier, G.'
;
Institut de Chimie Mol\'eculaire de Reims
UMR CNRS 7312
Case postale 44
UFR des Sciences Exactes et Naturelles
BP 1039
51687 Reims Cedex 2
France
;
'Martinez, A.'
;
Institut de Chimie Mol\'eculaire de Reims
UMR CNRS 7312
Case postale 44
UFR des Sciences Exactes et Naturelles
BP 1039
51687 Reims Cedex 2
France
;
'Wang, J.'
;
School of Chemistry
Faculty of Science
Monash University
Clayton 3800
Australia
;
'Werner, D.'
;
School of Chemistry
Faculty of Science
Monash University
Clayton 3800
Australia
;

_publ_section_title              
;
Divalent tetra- and 
pentaphenylcyclopentadienyl europium and samarium 
sandwich and half-sandwich complexes: synthesis, 
characterization and remarkable luminescence properties
;
_publ_section_abstract           
;
The synthesis of the bulky divalent (polyphenylcyclopentadienyl)lanthanoid 
sandwich complexes, [Ln(C5Ph5)2] (Ln = Sm, Eu) and [Ln(C5Ph4H)2(solv)] 
(Ln = Sm, solv = thf; Ln = Eu, solv = dme)], from 
redox-transmetalation/protolysis (RTP) reactions has been achieved. An 
analogous reaction with Yb afforded the solvent-separated ion pair (SSIP), 
[Yb(dme)4][C5Ph4H]2. In addition, rare divalent samarium halide complexes, 
[Sm(C5Ph5)(�-Br)(thf)2]2 and [Sm(C5Ph4H)I(thf)3], were also prepared, 
either by RTP or ligand rearrangement. X-ray studies showed that the 
[Ln(C5Ph5)2] complexes adopt highly symmetrical sandwich structures, 
whereas the [Ln(C5Ph4H)2(solv)] complexes have open sandwich structures. 
The unexpected solubility of the [Ln(C5Ph5)2] complexes allowed for 
variable temperature NMR spectra of [Sm(C5Ph5)2] to be obtained. 
Detailed 1D and 2D NMR studies were conducted on [Sm(C5Ph4H)2(thf)] to 
ascertain its structure in donor and non-donor solvents. During the 
course of these studies, the mixed tetraarylcyclopentadienyl sandwich 
complex, [Sm{C5(2,5-Ph)2(3,4-C6H4(CH3)-p)2H}2(thf)], was also prepared 
in order to fully assign the spectrum of [Sm(C5Ph4H)2(thf)]. The europium 
sandwich complexes, [Eu(C5Ph5)2] and [Eu(C5Ph4H)2(dme)], exhibit 
remarkable luminescence properties with high quantum yields (45 % and 
41 %, respectively) coupled with long emission lifetimes (approx. 800 ns 
and 1300 ns, respectively) in toluene.
;
_publ_section_references
;
Dolomanov, O.V., Bourhis, L.J., Gildea, R.J, Howard, J.A.K. & Puschmann, H.
 (2009), J. Appl. Cryst. 42, 339-341.

Sheldrick, G.M. (2008). Acta Cryst. A64, 112-122.
;
_chemical_name_common             ?
_chemical_name_systematic         ?
_chemical_formula_moiety          'C62 H50 O Sm'
_chemical_formula_sum             'C62 H50 O Sm'
_chemical_formula_weight          961.37
_chemical_melting_point           ?
loop_
  _atom_type_symbol
  _atom_type_description
  _atom_type_scat_dispersion_real
  _atom_type_scat_dispersion_imag
  _atom_type_scat_source
 'C' 'C' 0.0033 0.0016 'International Tables Vol C Tables 4.2.6.8 and 6.1.1.4'
 'H' 'H' 0.0000 0.0000 'International Tables Vol C Tables 4.2.6.8 and 6.1.1.4'
 'O' 'O' 0.0106 0.0060 'International Tables Vol C Tables 4.2.6.8 and 6.1.1.4'
 'Sm' 'Sm' -0.1120 3.4600
 'International Tables Vol C Tables 4.2.6.8 and 6.1.1.4'

_shelx_space_group_comment
;
The symmetry employed for this shelxl refinement is uniquely defined
by the following loop, which should always be used as a source of
symmetry information in preference to the above space-group names.
They are only intended as comments.
;
_space_group_crystal_system       'monoclinic'
_space_group_IT_number            14
_space_group_name_H-M_alt         'P 21/n'
_space_group_name_Hall            '-P 2yn'
loop_
  _space_group_symop_operation_xyz
 'x, y, z'
 '-x+1/2, y+1/2, -z+1/2'
 '-x, -y, -z'
 'x-1/2, -y-1/2, z-1/2'

_cell_length_a                    10.323(2)
_cell_length_b                    40.667(8)
_cell_length_c                    11.096(2)
_cell_angle_alpha                 90
_cell_angle_beta                  105.38(3)
_cell_angle_gamma                 90
_cell_volume                      4491.3(17)
_cell_formula_units_Z             4
_cell_measurement_reflns_used     84424
_cell_measurement_temperature     100
_cell_measurement_theta_max       28.753
_cell_measurement_theta_min       1.001
_shelx_estimated_absorpt_T_max    0.973
_shelx_estimated_absorpt_T_min    0.877
_exptl_absorpt_coefficient_mu     1.352
_exptl_absorpt_correction_T_max   ?
_exptl_absorpt_correction_T_min   ?
_exptl_absorpt_correction_type    none
_exptl_absorpt_process_details    ?
_exptl_absorpt_special_details    ?
_exptl_crystal_colour             'dark red'
_exptl_crystal_colour_modifier    dark
_exptl_crystal_colour_primary     red
_exptl_crystal_density_diffrn     1.422
_exptl_crystal_density_meas       ?
_exptl_crystal_density_method     'not measured'
_exptl_crystal_description        block
_exptl_crystal_F_000              1968
_exptl_crystal_size_max           0.1
_exptl_crystal_size_mid           0.05
_exptl_crystal_size_min           0.02
_exptl_transmission_factor_max    ?
_exptl_transmission_factor_min    ?
_diffrn_reflns_av_R_equivalents   0.1397
_diffrn_reflns_av_unetI/netI      0.0744
_diffrn_reflns_Laue_measured_fraction_full 0.999
_diffrn_reflns_Laue_measured_fraction_max 0.999
_diffrn_reflns_limit_h_max        13
_diffrn_reflns_limit_h_min        -13
_diffrn_reflns_limit_k_max        55
_diffrn_reflns_limit_k_min        -55
_diffrn_reflns_limit_l_max        15
_diffrn_reflns_limit_l_min        -15
_diffrn_reflns_number             84424
_diffrn_reflns_point_group_measured_fraction_full 0.999
_diffrn_reflns_point_group_measured_fraction_max 0.999
_diffrn_reflns_theta_full         25.500
_diffrn_reflns_theta_max          28.753
_diffrn_reflns_theta_min          1.001
_diffrn_ambient_temperature       100
_diffrn_detector_area_resol_mean  ?
_diffrn_measured_fraction_theta_full 0.999
_diffrn_measured_fraction_theta_max 0.999
_diffrn_measurement_device_type   'ADSC Quantum 210r'
_diffrn_measurement_method        'Phi Scan'
_diffrn_radiation_monochromator   'Silicon Double Crystal'
_diffrn_radiation_type            Synchrotron
_diffrn_radiation_wavelength      0.71069
_diffrn_source                    'Australian Synchrotron'
_reflns_Friedel_coverage          0.000
_reflns_Friedel_fraction_full     .
_reflns_Friedel_fraction_max      .
_reflns_number_gt                 8173
_reflns_number_total              11632
_reflns_special_details
;
 Reflections were merged by SHELXL according to the crystal
 class for the calculation of statistics and refinement.
 
 _reflns_Friedel_fraction is defined as the number of unique
 Friedel pairs measured divided by the number that would be
 possible theoretically, ignoring centric projections and
 systematic absences.
;
_reflns_threshold_expression      'I > 2\s(I)'
_computing_cell_refinement        'XDS (Kabsch, 1993)'
_computing_data_collection        'BluIce (McPhillips, 2002)'
_computing_data_reduction         'XDS (Kabsch, 1993)'
_computing_molecular_graphics     'Olex2 (Dolomanov et al., 2009)'
_computing_publication_material   'Olex2 (Dolomanov et al., 2009)'
_computing_structure_refinement   'ShelXL (Sheldrick, 2008)'
_computing_structure_solution     'ShelXS (Sheldrick, 2008)'
_refine_diff_density_max          1.310
_refine_diff_density_min          -1.418
_refine_diff_density_rms          0.121
_refine_ls_extinction_coef        .
_refine_ls_extinction_method      none
_refine_ls_goodness_of_fit_ref    1.034
_refine_ls_hydrogen_treatment     constr
_refine_ls_matrix_type            full
_refine_ls_number_parameters      577
_refine_ls_number_reflns          11632
_refine_ls_number_restraints      0
_refine_ls_R_factor_all           0.0835
_refine_ls_R_factor_gt            0.0513
_refine_ls_restrained_S_all       1.034
_refine_ls_shift/su_max           0.003
_refine_ls_shift/su_mean          0.000
_refine_ls_structure_factor_coef  Fsqd
_refine_ls_weighting_details
'w=1/[\s^2^(Fo^2^)+(0.0670P)^2^+2.4908P] where P=(Fo^2^+2Fc^2^)/3'
_refine_ls_weighting_scheme       calc
_refine_ls_wR_factor_gt           0.1208
_refine_ls_wR_factor_ref          0.1329
_refine_special_details           ?
_olex2_refinement_description
;
1. Fixed Uiso
 At 1.2 times of:
  All C(H) groups, All C(H,H) groups
2.a Secondary CH2 refined with riding coordinates:
 C59(H59A,H59B), C60(H60A,H60B), C61(H61A,H61B), C62(H62A,H62B)
2.b Aromatic/amide H refined with riding coordinates:
 C1(H1), C7(H7), C8(H8), C9(H9), C10(H10), C11(H11), C13(H13), C14(H14),
 C15(H15), C16(H16), C17(H17), C19(H19), C20(H20), C21(H21), C22(H22), C23(H23),
  C25(H25), C26(H26), C27(H27), C28(H28), C29(H29), C30(H30), C36(H36),
 C37(H37), C38(H38), C39(H39), C40(H40), C42(H42), C43(H43), C44(H44), C45(H45),
  C46(H46), C48(H48), C49(H49), C50(H50), C51(H51), C52(H52), C54(H54),
 C55(H55), C56(H56), C57(H57), C58(H58)
;
_atom_sites_solution_hydrogens    geom
_atom_sites_solution_primary      heavy
_atom_sites_solution_secondary    ?
loop_
  _atom_site_label
  _atom_site_type_symbol
  _atom_site_fract_x
  _atom_site_fract_y
  _atom_site_fract_z
  _atom_site_U_iso_or_equiv
  _atom_site_adp_type
  _atom_site_occupancy
  _atom_site_site_symmetry_order
  _atom_site_calc_flag
  _atom_site_refinement_flags_posn
  _atom_site_refinement_flags_adp
  _atom_site_refinement_flags_occupancy
  _atom_site_disorder_assembly
  _atom_site_disorder_group
 Sm1 Sm 0.25942(2) 0.88127(2) 0.11040(2) 0.02588(8) Uani 1 1 d . . . . .
 O1 O 0.4563(3) 0.90735(7) 0.0592(3) 0.0327(7) Uani 1 1 d . . . . .
 C1 C 0.4701(4) 0.83918(9) 0.2166(4) 0.0228(8) Uani 1 1 d . . . . .
 H1 H 0.5554 0.8496 0.2341 0.027 Uiso 1 1 calc R . . . .
 C2 C 0.4098(4) 0.82138(9) 0.1071(4) 0.0230(8) Uani 1 1 d . . . . .
 C3 C 0.2835(4) 0.80964(9) 0.1192(4) 0.0225(8) Uani 1 1 d . . . . .
 C4 C 0.2685(4) 0.81996(9) 0.2368(4) 0.0204(8) Uani 1 1 d . . . . .
 C5 C 0.3841(4) 0.83915(9) 0.2961(4) 0.0221(8) Uani 1 1 d . . . . .
 C6 C 0.4732(4) 0.81534(9) 0.0041(4) 0.0242(8) Uani 1 1 d . . . . .
 C7 C 0.6124(4) 0.81390(10) 0.0281(4) 0.0310(10) Uani 1 1 d . . . . .
 H7 H 0.6662 0.8165 0.1115 0.037 Uiso 1 1 calc R . . . .
 C8 C 0.6738(5) 0.80884(12) -0.0664(5) 0.0395(11) Uani 1 1 d . . . . .
 H8 H 0.7690 0.8080 -0.0477 0.047 Uiso 1 1 calc R . . . .
 C9 C 0.5977(6) 0.80500(13) -0.1880(5) 0.0458(13) Uani 1 1 d . . . . .
 H9 H 0.6400 0.8014 -0.2531 0.055 Uiso 1 1 calc R . . . .
 C10 C 0.4600(5) 0.80644(12) -0.2142(4) 0.0381(11) Uani 1 1 d . . . . .
 H10 H 0.4075 0.8040 -0.2981 0.046 Uiso 1 1 calc R . . . .
 C11 C 0.3969(5) 0.81141(11) -0.1206(4) 0.0317(10) Uani 1 1 d . . . . .
 H11 H 0.3016 0.8122 -0.1404 0.038 Uiso 1 1 calc R . . . .
 C12 C 0.1950(4) 0.78544(9) 0.0341(4) 0.0224(8) Uani 1 1 d . . . . .
 C13 C 0.2248(4) 0.75234(10) 0.0459(4) 0.0298(9) Uani 1 1 d . . . . .
 H13 H 0.3000 0.7451 0.1101 0.036 Uiso 1 1 calc R . . . .
 C14 C 0.1471(5) 0.72940(11) -0.0340(4) 0.0356(11) Uani 1 1 d . . . . .
 H14 H 0.1707 0.7068 -0.0251 0.043 Uiso 1 1 calc R . . . .
 C15 C 0.0364(5) 0.73912(11) -0.1257(4) 0.0316(10) Uani 1 1 d . . . . .
 H15 H -0.0155 0.7235 -0.1817 0.038 Uiso 1 1 calc R . . . .
 C16 C 0.0015(5) 0.77193(11) -0.1355(4) 0.0379(11) Uani 1 1 d . . . . .
 H16 H -0.0770 0.7788 -0.1965 0.046 Uiso 1 1 calc R . . . .
 C17 C 0.0818(5) 0.79519(11) -0.0555(4) 0.0361(11) Uani 1 1 d . . . . .
 H17 H 0.0578 0.8178 -0.0634 0.043 Uiso 1 1 calc R . . . .
 C18 C 0.1697(4) 0.80603(9) 0.2983(4) 0.0250(9) Uani 1 1 d . . . . .
 C19 C 0.0351(4) 0.80194(10) 0.2391(4) 0.0302(9) Uani 1 1 d . . . . .
 H19 H -0.0004 0.8108 0.1579 0.036 Uiso 1 1 calc R . . . .
 C20 C -0.0486(5) 0.78509(11) 0.2964(5) 0.0385(11) Uani 1 1 d . . . . .
 H20 H -0.1406 0.7822 0.2536 0.046 Uiso 1 1 calc R . . . .
 C21 C -0.0004(5) 0.77253(11) 0.4142(5) 0.0400(12) Uani 1 1 d . . . . .
 H21 H -0.0585 0.7608 0.4523 0.048 Uiso 1 1 calc R . . . .
 C22 C 0.1329(5) 0.77696(11) 0.4777(5) 0.0372(11) Uani 1 1 d . . . . .
 H22 H 0.1660 0.7687 0.5603 0.045 Uiso 1 1 calc R . . . .
 C23 C 0.2189(5) 0.79355(10) 0.4206(4) 0.0299(9) Uani 1 1 d . . . . .
 H23 H 0.3107 0.7965 0.4641 0.036 Uiso 1 1 calc R . . . .
 C24 C 0.4011(4) 0.86127(9) 0.4048(4) 0.0213(8) Uani 1 1 d . . . . .
 C25 C 0.2888(4) 0.87486(9) 0.4346(4) 0.0239(8) Uani 1 1 d . . . . .
 H25 H 0.2012 0.8683 0.3890 0.029 Uiso 1 1 calc R . . . .
 C26 C 0.3040(4) 0.89789(10) 0.5305(4) 0.0272(9) Uani 1 1 d . . . . .
 H26 H 0.2268 0.9067 0.5501 0.033 Uiso 1 1 calc R . . . .
 C27 C 0.4306(4) 0.90792(10) 0.5973(4) 0.0301(9) Uani 1 1 d . . . . .
 H27 H 0.4412 0.9241 0.6608 0.036 Uiso 1 1 calc R . . . .
 C28 C 0.5420(5) 0.89385(11) 0.5697(4) 0.0344(10) Uani 1 1 d . . . . .
 H28 H 0.6296 0.9000 0.6169 0.041 Uiso 1 1 calc R . . . .
 C29 C 0.5274(4) 0.87117(10) 0.4752(4) 0.0276(9) Uani 1 1 d . . . . .
 H29 H 0.6052 0.8621 0.4576 0.033 Uiso 1 1 calc R . . . .
 C30 C -0.0153(4) 0.89637(10) 0.0345(4) 0.0229(8) Uani 1 1 d . . . . .
 H30 H -0.0710 0.8779 0.0367 0.028 Uiso 1 1 calc R . . . .
 C31 C 0.0343(4) 0.90535(9) -0.0675(4) 0.0208(8) Uani 1 1 d . . . . .
 C32 C 0.1150(4) 0.93418(9) -0.0329(3) 0.0194(8) Uani 1 1 d . . . . .
 C33 C 0.1134(4) 0.94224(9) 0.0925(4) 0.0211(8) Uani 1 1 d . . . . .
 C34 C 0.0304(4) 0.91896(10) 0.1330(4) 0.0239(8) Uani 1 1 d . . . . .
 C35 C 0.0127(4) 0.88384(9) -0.1778(4) 0.0238(8) Uani 1 1 d . . . . .
 C36 C -0.1114(4) 0.86816(10) -0.2228(4) 0.0250(8) Uani 1 1 d . . . . .
 H36 H -0.1835 0.8736 -0.1880 0.030 Uiso 1 1 calc R . . . .
 C37 C -0.1311(4) 0.84480(10) -0.3175(4) 0.0288(9) Uani 1 1 d . . . . .
 H37 H -0.2166 0.8347 -0.3478 0.035 Uiso 1 1 calc R . . . .
 C38 C -0.0266(5) 0.83626(10) -0.3675(4) 0.0326(10) Uani 1 1 d . . . . .
 H38 H -0.0395 0.8198 -0.4304 0.039 Uiso 1 1 calc R . . . .
 C39 C 0.0966(5) 0.85164(11) -0.3259(4) 0.0297(9) Uani 1 1 d . . . . .
 H39 H 0.1681 0.8460 -0.3611 0.036 Uiso 1 1 calc R . . . .
 C40 C 0.1158(4) 0.87529(9) -0.2327(4) 0.0254(9) Uani 1 1 d . . . . .
 H40 H 0.2005 0.8859 -0.2055 0.030 Uiso 1 1 calc R . . . .
 C41 C 0.1805(4) 0.95275(9) -0.1147(4) 0.0210(8) Uani 1 1 d . . . . .
 C42 C 0.1214(4) 0.95459(10) -0.2435(4) 0.0256(9) Uani 1 1 d . . . . .
 H42 H 0.0359 0.9448 -0.2772 0.031 Uiso 1 1 calc R . . . .
 C43 C 0.1845(4) 0.97036(10) -0.3233(4) 0.0278(9) Uani 1 1 d . . . . .
 H43 H 0.1434 0.9708 -0.4107 0.033 Uiso 1 1 calc R . . . .
 C44 C 0.3069(4) 0.98543(10) -0.2757(4) 0.0291(9) Uani 1 1 d . . . . .
 H44 H 0.3508 0.9961 -0.3300 0.035 Uiso 1 1 calc R . . . .
 C45 C 0.3650(4) 0.98488(10) -0.1489(4) 0.0263(9) Uani 1 1 d . . . . .
 H45 H 0.4488 0.9956 -0.1158 0.032 Uiso 1 1 calc R . . . .
 C46 C 0.3031(4) 0.96899(9) -0.0693(4) 0.0234(8) Uani 1 1 d . . . . .
 H46 H 0.3446 0.9691 0.0180 0.028 Uiso 1 1 calc R . . . .
 C47 C 0.1855(4) 0.96944(10) 0.1718(4) 0.0212(8) Uani 1 1 d . . . . .
 C48 C 0.1654(4) 1.00262(10) 0.1367(4) 0.0276(9) Uani 1 1 d . . . . .
 H48 H 0.1088 1.0082 0.0569 0.033 Uiso 1 1 calc R . . . .
 C49 C 0.2275(4) 1.02716(11) 0.2176(5) 0.0329(10) Uani 1 1 d . . . . .
 H49 H 0.2115 1.0495 0.1934 0.039 Uiso 1 1 calc R . . . .
 C50 C 0.3130(5) 1.01969(12) 0.3337(5) 0.0364(11) Uani 1 1 d . . . . .
 H50 H 0.3552 1.0368 0.3887 0.044 Uiso 1 1 calc R . . . .
 C51 C 0.3361(5) 0.98711(12) 0.3683(4) 0.0357(11) Uani 1 1 d . . . . .
 H51 H 0.3952 0.9817 0.4472 0.043 Uiso 1 1 calc R . . . .
 C52 C 0.2734(4) 0.96227(11) 0.2882(4) 0.0305(10) Uani 1 1 d . . . . .
 H52 H 0.2904 0.9400 0.3129 0.037 Uiso 1 1 calc R . . . .
 C53 C -0.0175(4) 0.91842(10) 0.2477(4) 0.0229(8) Uani 1 1 d . . . . .
 C54 C -0.0349(4) 0.94697(11) 0.3116(4) 0.0282(9) Uani 1 1 d . . . . .
 H54 H -0.0087 0.9677 0.2859 0.034 Uiso 1 1 calc R . . . .
 C55 C -0.0905(4) 0.94515(12) 0.4131(4) 0.0334(10) Uani 1 1 d . . . . .
 H55 H -0.1016 0.9647 0.4562 0.040 Uiso 1 1 calc R . . . .
 C56 C -0.1293(4) 0.91564(13) 0.4515(4) 0.0368(11) Uani 1 1 d . . . . .
 H56 H -0.1655 0.9146 0.5217 0.044 Uiso 1 1 calc R . . . .
 C57 C -0.1155(5) 0.88743(12) 0.3875(4) 0.0360(11) Uani 1 1 d . . . . .
 H57 H -0.1447 0.8670 0.4122 0.043 Uiso 1 1 calc R . . . .
 C58 C -0.0594(4) 0.88870(11) 0.2879(4) 0.0296(9) Uani 1 1 d . . . . .
 H58 H -0.0490 0.8689 0.2457 0.035 Uiso 1 1 calc R . . . .
 C59 C 0.5725(4) 0.92482(12) 0.1351(4) 0.0386(11) Uani 1 1 d . . . . .
 H59A H 0.6245 0.9106 0.2032 0.046 Uiso 1 1 calc R . . . .
 H59B H 0.5442 0.9448 0.1723 0.046 Uiso 1 1 calc R . . . .
 C60 C 0.6550(5) 0.93377(12) 0.0467(5) 0.0387(11) Uani 1 1 d . . . . .
 H60A H 0.7516 0.9353 0.0909 0.046 Uiso 1 1 calc R . . . .
 H60B H 0.6251 0.9549 0.0041 0.046 Uiso 1 1 calc R . . . .
 C61 C 0.6278(5) 0.90533(13) -0.0451(6) 0.0453(13) Uani 1 1 d . . . . .
 H61A H 0.6465 0.9114 -0.1252 0.054 Uiso 1 1 calc R . . . .
 H61B H 0.6817 0.8857 -0.0102 0.054 Uiso 1 1 calc R . . . .
 C62 C 0.4815(5) 0.89962(11) -0.0608(5) 0.0353(11) Uani 1 1 d . . . . .
 H62A H 0.4273 0.9140 -0.1272 0.042 Uiso 1 1 calc R . . . .
 H62B H 0.4580 0.8764 -0.0838 0.042 Uiso 1 1 calc R . . . .

loop_
  _atom_site_aniso_label
  _atom_site_aniso_U_11
  _atom_site_aniso_U_22
  _atom_site_aniso_U_33
  _atom_site_aniso_U_23
  _atom_site_aniso_U_13
  _atom_site_aniso_U_12
 Sm1 0.02070(11) 0.01860(11) 0.03773(12) 0.00555(9) 0.00664(8) 0.00338(9)
 O1 0.0234(15) 0.0281(16) 0.0437(18) 0.0096(13) 0.0034(13) -0.0050(12)
 C1 0.0185(19) 0.0168(18) 0.031(2) 0.0015(15) 0.0022(16) 0.0018(15)
 C2 0.024(2) 0.0173(18) 0.0246(19) 0.0019(15) 0.0018(16) 0.0045(15)
 C3 0.023(2) 0.0170(18) 0.0233(19) 0.0008(15) -0.0006(16) 0.0003(15)
 C4 0.0196(19) 0.0164(18) 0.0232(18) 0.0014(14) 0.0022(15) 0.0028(14)
 C5 0.023(2) 0.0152(18) 0.0248(19) 0.0010(14) 0.0007(15) -0.0001(15)
 C6 0.025(2) 0.0160(18) 0.033(2) 0.0021(16) 0.0110(17) 0.0034(15)
 C7 0.032(2) 0.025(2) 0.033(2) -0.0018(17) 0.0045(19) 0.0026(18)
 C8 0.031(2) 0.042(3) 0.051(3) -0.006(2) 0.021(2) 0.000(2)
 C9 0.062(4) 0.040(3) 0.044(3) -0.006(2) 0.029(3) -0.009(3)
 C10 0.052(3) 0.035(3) 0.028(2) -0.0058(19) 0.012(2) -0.008(2)
 C11 0.037(2) 0.028(2) 0.029(2) 0.0000(18) 0.0062(19) 0.0014(19)
 C12 0.024(2) 0.0162(18) 0.0253(19) -0.0029(15) 0.0039(16) -0.0036(15)
 C13 0.031(2) 0.023(2) 0.031(2) 0.0040(17) -0.0007(18) 0.0042(17)
 C14 0.041(3) 0.019(2) 0.039(2) -0.0018(18) -0.002(2) -0.0002(18)
 C15 0.035(2) 0.026(2) 0.032(2) -0.0057(17) 0.0060(19) -0.0100(18)
 C16 0.031(2) 0.031(2) 0.040(3) 0.001(2) -0.010(2) -0.0031(19)
 C17 0.035(2) 0.018(2) 0.043(3) -0.0001(18) -0.010(2) 0.0004(18)
 C18 0.030(2) 0.0149(18) 0.030(2) -0.0030(15) 0.0084(17) -0.0020(16)
 C19 0.029(2) 0.021(2) 0.041(2) -0.0025(17) 0.0089(19) -0.0010(17)
 C20 0.030(2) 0.026(2) 0.061(3) -0.008(2) 0.015(2) -0.0075(19)
 C21 0.045(3) 0.024(2) 0.061(3) -0.006(2) 0.032(3) -0.009(2)
 C22 0.051(3) 0.026(2) 0.038(3) -0.0003(19) 0.020(2) 0.002(2)
 C23 0.036(2) 0.023(2) 0.033(2) -0.0031(17) 0.0131(19) -0.0042(18)
 C24 0.0217(19) 0.0156(18) 0.0263(19) 0.0016(14) 0.0057(15) -0.0020(15)
 C25 0.024(2) 0.022(2) 0.0266(19) 0.0007(15) 0.0077(16) -0.0009(15)
 C26 0.026(2) 0.027(2) 0.031(2) -0.0035(17) 0.0100(17) 0.0026(17)
 C27 0.037(2) 0.026(2) 0.027(2) -0.0053(17) 0.0069(18) -0.0022(18)
 C28 0.031(2) 0.030(2) 0.035(2) -0.0078(19) -0.0024(19) -0.0047(19)
 C29 0.025(2) 0.024(2) 0.031(2) -0.0032(17) 0.0038(17) 0.0002(16)
 C30 0.0165(18) 0.0209(19) 0.029(2) -0.0021(16) 0.0027(15) 0.0003(15)
 C31 0.0155(18) 0.0215(19) 0.0249(19) 0.0006(15) 0.0043(15) 0.0033(15)
 C32 0.0165(18) 0.0157(17) 0.0239(18) -0.0002(14) 0.0016(14) 0.0030(14)
 C33 0.0191(19) 0.0155(17) 0.0270(19) 0.0003(15) 0.0029(15) 0.0024(14)
 C34 0.022(2) 0.0222(19) 0.026(2) 0.0038(16) 0.0030(16) 0.0043(16)
 C35 0.024(2) 0.0201(19) 0.0230(18) 0.0009(15) -0.0005(15) 0.0025(16)
 C36 0.021(2) 0.0194(18) 0.033(2) 0.0033(16) 0.0045(16) 0.0020(16)
 C37 0.030(2) 0.023(2) 0.028(2) -0.0013(16) -0.0001(17) -0.0048(17)
 C38 0.041(3) 0.022(2) 0.030(2) -0.0033(17) 0.0007(19) 0.0033(18)
 C39 0.036(2) 0.027(2) 0.025(2) 0.0009(17) 0.0066(18) 0.0042(18)
 C40 0.024(2) 0.020(2) 0.031(2) 0.0010(15) 0.0048(16) 0.0015(15)
 C41 0.0199(19) 0.0144(17) 0.0264(19) -0.0010(14) 0.0021(15) 0.0051(14)
 C42 0.026(2) 0.021(2) 0.028(2) -0.0008(16) 0.0033(17) 0.0010(16)
 C43 0.034(2) 0.023(2) 0.024(2) -0.0003(16) 0.0032(17) 0.0044(17)
 C44 0.034(2) 0.022(2) 0.034(2) -0.0003(17) 0.0136(19) -0.0029(17)
 C45 0.023(2) 0.022(2) 0.034(2) -0.0011(16) 0.0070(17) -0.0045(16)
 C46 0.0206(19) 0.0204(19) 0.026(2) -0.0039(15) 0.0008(16) -0.0001(15)
 C47 0.0179(18) 0.0211(19) 0.0250(19) 0.0002(15) 0.0062(15) -0.0020(15)
 C48 0.027(2) 0.021(2) 0.033(2) -0.0022(17) 0.0056(18) -0.0006(16)
 C49 0.029(2) 0.019(2) 0.054(3) -0.0032(19) 0.016(2) -0.0041(17)
 C50 0.032(2) 0.035(3) 0.043(3) -0.016(2) 0.011(2) -0.012(2)
 C51 0.034(2) 0.039(3) 0.029(2) -0.0061(19) 0.0012(19) -0.005(2)
 C52 0.034(2) 0.027(2) 0.027(2) -0.0002(17) 0.0026(18) 0.0005(18)
 C53 0.0185(19) 0.025(2) 0.0227(19) 0.0033(15) 0.0011(15) 0.0028(15)
 C54 0.024(2) 0.031(2) 0.028(2) 0.0024(17) 0.0037(17) 0.0029(17)
 C55 0.027(2) 0.044(3) 0.028(2) -0.0033(19) 0.0061(18) 0.004(2)
 C56 0.027(2) 0.055(3) 0.031(2) 0.009(2) 0.0114(19) 0.001(2)
 C57 0.030(2) 0.040(3) 0.035(2) 0.014(2) 0.0055(19) 0.003(2)
 C58 0.025(2) 0.030(2) 0.033(2) 0.0043(17) 0.0064(18) -0.0003(17)
 C59 0.028(2) 0.034(3) 0.044(3) 0.007(2) -0.007(2) -0.0039(19)
 C60 0.021(2) 0.031(2) 0.062(3) 0.003(2) 0.007(2) -0.0021(18)
 C61 0.026(2) 0.035(3) 0.077(4) -0.002(3) 0.017(2) 0.000(2)
 C62 0.028(2) 0.022(2) 0.056(3) 0.001(2) 0.013(2) -0.0016(18)

_geom_special_details
;
 All esds (except the esd in the dihedral angle between two l.s. planes)
 are estimated using the full covariance matrix.  The cell esds are taken
 into account individually in the estimation of esds in distances, angles
 and torsion angles; correlations between esds in cell parameters are only
 used when they are defined by crystal symmetry.  An approximate (isotropic)
 treatment of cell esds is used for estimating esds involving l.s. planes.
;
loop_
  _geom_bond_atom_site_label_1
  _geom_bond_atom_site_label_2
  _geom_bond_distance
  _geom_bond_site_symmetry_2
  _geom_bond_publ_flag
 Sm1 O1 2.488(3) . ?
 Sm1 C1 2.773(4) . ?
 Sm1 C2 2.894(4) . ?
 Sm1 C3 2.923(4) . ?
 Sm1 C4 2.850(4) . ?
 Sm1 C5 2.726(4) . ?
 Sm1 C30 2.804(4) . ?
 Sm1 C31 2.797(4) . ?
 Sm1 C32 2.850(4) . ?
 Sm1 C33 2.881(4) . ?
 Sm1 C34 2.884(4) . ?
 O1 C59 1.455(5) . ?
 O1 C62 1.457(6) . ?
 C1 H1 0.9500 . ?
 C1 C2 1.409(5) . ?
 C1 C5 1.408(6) . ?
 C2 C3 1.427(6) . ?
 C2 C6 1.481(6) . ?
 C3 C4 1.418(5) . ?
 C3 C12 1.495(5) . ?
 C4 C5 1.431(5) . ?
 C4 C18 1.483(6) . ?
 C5 C24 1.477(5) . ?
 C6 C7 1.392(6) . ?
 C6 C11 1.408(6) . ?
 C7 H7 0.9500 . ?
 C7 C8 1.377(6) . ?
 C8 H8 0.9500 . ?
 C8 C9 1.378(7) . ?
 C9 H9 0.9500 . ?
 C9 C10 1.374(7) . ?
 C10 H10 0.9500 . ?
 C10 C11 1.379(6) . ?
 C11 H11 0.9500 . ?
 C12 C13 1.379(5) . ?
 C12 C17 1.377(6) . ?
 C13 H13 0.9500 . ?
 C13 C14 1.386(6) . ?
 C14 H14 0.9500 . ?
 C14 C15 1.372(6) . ?
 C15 H15 0.9500 . ?
 C15 C16 1.379(6) . ?
 C16 H16 0.9500 . ?
 C16 C17 1.407(6) . ?
 C17 H17 0.9500 . ?
 C18 C19 1.380(6) . ?
 C18 C23 1.411(6) . ?
 C19 H19 0.9500 . ?
 C19 C20 1.383(6) . ?
 C20 H20 0.9500 . ?
 C20 C21 1.368(7) . ?
 C21 H21 0.9500 . ?
 C21 C22 1.382(7) . ?
 C22 H22 0.9500 . ?
 C22 C23 1.393(6) . ?
 C23 H23 0.9500 . ?
 C24 C25 1.401(6) . ?
 C24 C29 1.390(5) . ?
 C25 H25 0.9500 . ?
 C25 C26 1.395(6) . ?
 C26 H26 0.9500 . ?
 C26 C27 1.382(6) . ?
 C27 H27 0.9500 . ?
 C27 C28 1.390(7) . ?
 C28 H28 0.9500 . ?
 C28 C29 1.375(6) . ?
 C29 H29 0.9500 . ?
 C30 H30 0.9500 . ?
 C30 C31 1.409(6) . ?
 C30 C34 1.410(5) . ?
 C31 C32 1.430(5) . ?
 C31 C35 1.473(5) . ?
 C32 C33 1.434(5) . ?
 C32 C41 1.475(6) . ?
 C33 C34 1.427(6) . ?
 C33 C47 1.485(5) . ?
 C34 C53 1.483(6) . ?
 C35 C36 1.400(6) . ?
 C35 C40 1.403(6) . ?
 C36 H36 0.9500 . ?
 C36 C37 1.391(6) . ?
 C37 H37 0.9500 . ?
 C37 C38 1.382(6) . ?
 C38 H38 0.9500 . ?
 C38 C39 1.383(6) . ?
 C39 H39 0.9500 . ?
 C39 C40 1.387(6) . ?
 C40 H40 0.9500 . ?
 C41 C42 1.400(5) . ?
 C41 C46 1.398(5) . ?
 C42 H42 0.9500 . ?
 C42 C43 1.388(6) . ?
 C43 H43 0.9500 . ?
 C43 C44 1.377(6) . ?
 C44 H44 0.9500 . ?
 C44 C45 1.375(6) . ?
 C45 H45 0.9500 . ?
 C45 C46 1.381(6) . ?
 C46 H46 0.9500 . ?
 C47 C48 1.405(5) . ?
 C47 C52 1.398(5) . ?
 C48 H48 0.9500 . ?
 C48 C49 1.381(6) . ?
 C49 H49 0.9500 . ?
 C49 C50 1.389(7) . ?
 C50 H50 0.9500 . ?
 C50 C51 1.382(7) . ?
 C51 H51 0.9500 . ?
 C51 C52 1.387(6) . ?
 C52 H52 0.9500 . ?
 C53 C54 1.396(6) . ?
 C53 C58 1.396(6) . ?
 C54 H54 0.9500 . ?
 C54 C55 1.395(6) . ?
 C55 H55 0.9500 . ?
 C55 C56 1.369(7) . ?
 C56 H56 0.9500 . ?
 C56 C57 1.376(7) . ?
 C57 H57 0.9500 . ?
 C57 C58 1.378(7) . ?
 C58 H58 0.9500 . ?
 C59 H59A 0.9900 . ?
 C59 H59B 0.9900 . ?
 C59 C60 1.504(7) . ?
 C60 H60A 0.9900 . ?
 C60 H60B 0.9900 . ?
 C60 C61 1.518(7) . ?
 C61 H61A 0.9900 . ?
 C61 H61B 0.9900 . ?
 C61 C62 1.492(6) . ?
 C62 H62A 0.9900 . ?
 C62 H62B 0.9900 . ?

loop_
  _geom_angle_atom_site_label_1
  _geom_angle_atom_site_label_2
  _geom_angle_atom_site_label_3
  _geom_angle
  _geom_angle_site_symmetry_1
  _geom_angle_site_symmetry_3
  _geom_angle_publ_flag
 O1 Sm1 C1 76.37(11) . . ?
 O1 Sm1 C2 83.25(11) . . ?
 O1 Sm1 C3 111.40(11) . . ?
 O1 Sm1 C4 124.26(10) . . ?
 O1 Sm1 C5 100.97(11) . . ?
 O1 Sm1 C30 131.33(11) . . ?
 O1 Sm1 C31 105.40(11) . . ?
 O1 Sm1 C32 83.62(10) . . ?
 O1 Sm1 C33 93.53(11) . . ?
 O1 Sm1 C34 122.10(11) . . ?
 C1 Sm1 C2 28.70(11) . . ?
 C1 Sm1 C3 47.19(11) . . ?
 C1 Sm1 C4 48.00(11) . . ?
 C1 Sm1 C30 151.59(12) . . ?
 C1 Sm1 C31 158.02(11) . . ?
 C1 Sm1 C32 159.79(12) . . ?
 C1 Sm1 C33 153.84(11) . . ?
 C1 Sm1 C34 149.29(12) . . ?
 C2 Sm1 C3 28.40(11) . . ?
 C4 Sm1 C2 47.31(11) . . ?
 C4 Sm1 C3 28.40(11) . . ?
 C4 Sm1 C32 151.53(11) . . ?
 C4 Sm1 C33 137.32(11) . . ?
 C4 Sm1 C34 110.06(12) . . ?
 C5 Sm1 C1 29.65(12) . . ?
 C5 Sm1 C2 48.19(12) . . ?
 C5 Sm1 C3 47.91(11) . . ?
 C5 Sm1 C4 29.64(11) . . ?
 C5 Sm1 C30 126.98(12) . . ?
 C5 Sm1 C31 152.98(12) . . ?
 C5 Sm1 C32 165.54(11) . . ?
 C5 Sm1 C33 136.58(12) . . ?
 C5 Sm1 C34 120.11(12) . . ?
 C30 Sm1 C2 133.15(11) . . ?
 C30 Sm1 C3 107.38(11) . . ?
 C30 Sm1 C4 103.78(12) . . ?
 C30 Sm1 C32 47.88(11) . . ?
 C30 Sm1 C33 47.29(11) . . ?
 C30 Sm1 C34 28.66(11) . . ?
 C31 Sm1 C2 129.35(11) . . ?
 C31 Sm1 C3 114.83(11) . . ?
 C31 Sm1 C4 124.50(11) . . ?
 C31 Sm1 C30 29.14(11) . . ?
 C31 Sm1 C32 29.33(10) . . ?
 C31 Sm1 C33 47.81(11) . . ?
 C31 Sm1 C34 47.81(11) . . ?
 C32 Sm1 C2 146.26(11) . . ?
 C32 Sm1 C3 142.97(10) . . ?
 C32 Sm1 C33 28.97(11) . . ?
 C32 Sm1 C34 47.74(11) . . ?
 C33 Sm1 C2 174.96(11) . . ?
 C33 Sm1 C3 153.93(11) . . ?
 C33 Sm1 C34 28.66(11) . . ?
 C34 Sm1 C2 154.61(12) . . ?
 C34 Sm1 C3 126.25(11) . . ?
 C59 O1 Sm1 132.4(3) . . ?
 C59 O1 C62 108.3(3) . . ?
 C62 O1 Sm1 118.1(2) . . ?
 Sm1 C1 H1 113.1 . . ?
 C2 C1 Sm1 80.4(2) . . ?
 C2 C1 H1 125.3 . . ?
 C5 C1 Sm1 73.3(2) . . ?
 C5 C1 H1 125.3 . . ?
 C5 C1 C2 109.4(4) . . ?
 C1 C2 Sm1 70.9(2) . . ?
 C1 C2 C3 107.2(4) . . ?
 C1 C2 C6 124.5(4) . . ?
 C3 C2 Sm1 76.9(2) . . ?
 C3 C2 C6 128.2(4) . . ?
 C6 C2 Sm1 119.9(2) . . ?
 C2 C3 Sm1 74.7(2) . . ?
 C2 C3 C12 125.6(4) . . ?
 C4 C3 Sm1 72.9(2) . . ?
 C4 C3 C2 108.2(3) . . ?
 C4 C3 C12 125.3(4) . . ?
 C12 C3 Sm1 127.0(2) . . ?
 C3 C4 Sm1 78.7(2) . . ?
 C3 C4 C5 107.7(3) . . ?
 C3 C4 C18 124.6(3) . . ?
 C5 C4 Sm1 70.4(2) . . ?
 C5 C4 C18 126.0(3) . . ?
 C18 C4 Sm1 128.6(3) . . ?
 C1 C5 Sm1 77.0(2) . . ?
 C1 C5 C4 107.4(3) . . ?
 C1 C5 C24 123.6(3) . . ?
 C4 C5 Sm1 80.0(2) . . ?
 C4 C5 C24 127.7(4) . . ?
 C24 C5 Sm1 99.5(2) . . ?
 C7 C6 C2 120.3(4) . . ?
 C7 C6 C11 117.6(4) . . ?
 C11 C6 C2 122.1(4) . . ?
 C6 C7 H7 119.3 . . ?
 C8 C7 C6 121.4(4) . . ?
 C8 C7 H7 119.3 . . ?
 C7 C8 H8 119.8 . . ?
 C7 C8 C9 120.3(5) . . ?
 C9 C8 H8 119.8 . . ?
 C8 C9 H9 120.3 . . ?
 C10 C9 C8 119.4(5) . . ?
 C10 C9 H9 120.3 . . ?
 C9 C10 H10 119.5 . . ?
 C9 C10 C11 121.0(5) . . ?
 C11 C10 H10 119.5 . . ?
 C6 C11 H11 119.9 . . ?
 C10 C11 C6 120.3(4) . . ?
 C10 C11 H11 119.9 . . ?
 C13 C12 C3 119.9(4) . . ?
 C17 C12 C3 121.7(4) . . ?
 C17 C12 C13 118.3(4) . . ?
 C12 C13 H13 119.3 . . ?
 C12 C13 C14 121.3(4) . . ?
 C14 C13 H13 119.3 . . ?
 C13 C14 H14 119.8 . . ?
 C15 C14 C13 120.5(4) . . ?
 C15 C14 H14 119.8 . . ?
 C14 C15 H15 120.4 . . ?
 C14 C15 C16 119.1(4) . . ?
 C16 C15 H15 120.4 . . ?
 C15 C16 H16 119.9 . . ?
 C15 C16 C17 120.2(4) . . ?
 C17 C16 H16 119.9 . . ?
 C12 C17 C16 120.5(4) . . ?
 C12 C17 H17 119.8 . . ?
 C16 C17 H17 119.8 . . ?
 C19 C18 C4 123.7(4) . . ?
 C19 C18 C23 118.3(4) . . ?
 C23 C18 C4 117.7(4) . . ?
 C18 C19 H19 119.5 . . ?
 C18 C19 C20 120.9(4) . . ?
 C20 C19 H19 119.5 . . ?
 C19 C20 H20 119.6 . . ?
 C21 C20 C19 120.7(5) . . ?
 C21 C20 H20 119.6 . . ?
 C20 C21 H21 120.0 . . ?
 C20 C21 C22 120.0(4) . . ?
 C22 C21 H21 120.0 . . ?
 C21 C22 H22 120.0 . . ?
 C21 C22 C23 120.0(5) . . ?
 C23 C22 H22 120.0 . . ?
 C18 C23 H23 120.0 . . ?
 C22 C23 C18 120.1(4) . . ?
 C22 C23 H23 120.0 . . ?
 C25 C24 C5 120.4(3) . . ?
 C29 C24 C5 121.7(4) . . ?
 C29 C24 C25 117.7(4) . . ?
 C24 C25 H25 119.6 . . ?
 C26 C25 C24 120.8(4) . . ?
 C26 C25 H25 119.6 . . ?
 C25 C26 H26 119.8 . . ?
 C27 C26 C25 120.4(4) . . ?
 C27 C26 H26 119.8 . . ?
 C26 C27 H27 120.6 . . ?
 C26 C27 C28 118.7(4) . . ?
 C28 C27 H27 120.6 . . ?
 C27 C28 H28 119.5 . . ?
 C29 C28 C27 121.0(4) . . ?
 C29 C28 H28 119.5 . . ?
 C24 C29 H29 119.4 . . ?
 C28 C29 C24 121.3(4) . . ?
 C28 C29 H29 119.4 . . ?
 Sm1 C30 H30 113.0 . . ?
 C31 C30 Sm1 75.2(2) . . ?
 C31 C30 H30 125.2 . . ?
 C31 C30 C34 109.6(4) . . ?
 C34 C30 Sm1 78.8(2) . . ?
 C34 C30 H30 125.2 . . ?
 C30 C31 Sm1 75.7(2) . . ?
 C30 C31 C32 107.9(3) . . ?
 C30 C31 C35 120.4(4) . . ?
 C32 C31 Sm1 77.4(2) . . ?
 C32 C31 C35 131.2(4) . . ?
 C35 C31 Sm1 107.0(2) . . ?
 C31 C32 Sm1 73.3(2) . . ?
 C31 C32 C33 107.0(3) . . ?
 C31 C32 C41 125.7(3) . . ?
 C33 C32 Sm1 76.7(2) . . ?
 C33 C32 C41 127.2(3) . . ?
 C41 C32 Sm1 118.2(2) . . ?
 C32 C33 Sm1 74.3(2) . . ?
 C32 C33 C47 127.7(4) . . ?
 C34 C33 Sm1 75.8(2) . . ?
 C34 C33 C32 108.5(3) . . ?
 C34 C33 C47 123.8(4) . . ?
 C47 C33 Sm1 115.4(2) . . ?
 C30 C34 Sm1 72.5(2) . . ?
 C30 C34 C33 107.1(4) . . ?
 C30 C34 C53 122.5(4) . . ?
 C33 C34 Sm1 75.6(2) . . ?
 C33 C34 C53 130.2(4) . . ?
 C53 C34 Sm1 122.3(2) . . ?
 C36 C35 C31 119.3(4) . . ?
 C36 C35 C40 117.4(4) . . ?
 C40 C35 C31 122.9(4) . . ?
 C35 C36 H36 119.4 . . ?
 C37 C36 C35 121.2(4) . . ?
 C37 C36 H36 119.4 . . ?
 C36 C37 H37 120.0 . . ?
 C38 C37 C36 120.1(4) . . ?
 C38 C37 H37 120.0 . . ?
 C37 C38 H38 120.0 . . ?
 C37 C38 C39 120.0(4) . . ?
 C39 C38 H38 120.0 . . ?
 C38 C39 H39 120.0 . . ?
 C38 C39 C40 120.0(4) . . ?
 C40 C39 H39 120.0 . . ?
 C35 C40 H40 119.3 . . ?
 C39 C40 C35 121.4(4) . . ?
 C39 C40 H40 119.3 . . ?
 C42 C41 C32 120.6(4) . . ?
 C46 C41 C32 122.6(4) . . ?
 C46 C41 C42 116.8(4) . . ?
 C41 C42 H42 119.2 . . ?
 C43 C42 C41 121.7(4) . . ?
 C43 C42 H42 119.2 . . ?
 C42 C43 H43 120.0 . . ?
 C44 C43 C42 119.9(4) . . ?
 C44 C43 H43 120.0 . . ?
 C43 C44 H44 120.3 . . ?
 C45 C44 C43 119.5(4) . . ?
 C45 C44 H44 120.3 . . ?
 C44 C45 H45 119.6 . . ?
 C44 C45 C46 120.8(4) . . ?
 C46 C45 H45 119.6 . . ?
 C41 C46 H46 119.3 . . ?
 C45 C46 C41 121.3(4) . . ?
 C45 C46 H46 119.3 . . ?
 C48 C47 C33 122.5(3) . . ?
 C52 C47 C33 119.5(4) . . ?
 C52 C47 C48 118.0(4) . . ?
 C47 C48 H48 119.8 . . ?
 C49 C48 C47 120.3(4) . . ?
 C49 C48 H48 119.8 . . ?
 C48 C49 H49 119.5 . . ?
 C48 C49 C50 121.1(4) . . ?
 C50 C49 H49 119.5 . . ?
 C49 C50 H50 120.4 . . ?
 C51 C50 C49 119.2(4) . . ?
 C51 C50 H50 120.4 . . ?
 C50 C51 H51 119.9 . . ?
 C50 C51 C52 120.2(4) . . ?
 C52 C51 H51 119.9 . . ?
 C47 C52 H52 119.4 . . ?
 C51 C52 C47 121.2(4) . . ?
 C51 C52 H52 119.4 . . ?
 C54 C53 C34 122.7(4) . . ?
 C58 C53 C34 119.3(4) . . ?
 C58 C53 C54 117.7(4) . . ?
 C53 C54 H54 119.9 . . ?
 C55 C54 C53 120.1(4) . . ?
 C55 C54 H54 119.9 . . ?
 C54 C55 H55 119.5 . . ?
 C56 C55 C54 121.0(4) . . ?
 C56 C55 H55 119.5 . . ?
 C55 C56 H56 120.3 . . ?
 C55 C56 C57 119.4(4) . . ?
 C57 C56 H56 120.3 . . ?
 C56 C57 H57 119.8 . . ?
 C56 C57 C58 120.4(4) . . ?
 C58 C57 H57 119.8 . . ?
 C53 C58 H58 119.3 . . ?
 C57 C58 C53 121.3(4) . . ?
 C57 C58 H58 119.3 . . ?
 O1 C59 H59A 110.7 . . ?
 O1 C59 H59B 110.7 . . ?
 O1 C59 C60 105.3(4) . . ?
 H59A C59 H59B 108.8 . . ?
 C60 C59 H59A 110.7 . . ?
 C60 C59 H59B 110.7 . . ?
 C59 C60 H60A 111.3 . . ?
 C59 C60 H60B 111.3 . . ?
 C59 C60 C61 102.6(4) . . ?
 H60A C60 H60B 109.2 . . ?
 C61 C60 H60A 111.3 . . ?
 C61 C60 H60B 111.3 . . ?
 C60 C61 H61A 111.5 . . ?
 C60 C61 H61B 111.5 . . ?
 H61A C61 H61B 109.3 . . ?
 C62 C61 C60 101.4(4) . . ?
 C62 C61 H61A 111.5 . . ?
 C62 C61 H61B 111.5 . . ?
 O1 C62 C61 106.3(4) . . ?
 O1 C62 H62A 110.5 . . ?
 O1 C62 H62B 110.5 . . ?
 C61 C62 H62A 110.5 . . ?
 C61 C62 H62B 110.5 . . ?
 H62A C62 H62B 108.7 . . ?

loop_
  _geom_torsion_atom_site_label_1
  _geom_torsion_atom_site_label_2
  _geom_torsion_atom_site_label_3
  _geom_torsion_atom_site_label_4
  _geom_torsion
  _geom_torsion_site_symmetry_1
  _geom_torsion_site_symmetry_2
  _geom_torsion_site_symmetry_3
  _geom_torsion_site_symmetry_4
  _geom_torsion_publ_flag
 Sm1 O1 C59 C60 179.1(3) . . . . ?
 Sm1 O1 C62 C61 -155.5(3) . . . . ?
 Sm1 C1 C2 C3 -69.0(3) . . . . ?
 Sm1 C1 C2 C6 113.6(4) . . . . ?
 Sm1 C1 C5 C4 75.0(3) . . . . ?
 Sm1 C1 C5 C24 -92.8(3) . . . . ?
 Sm1 C2 C3 C4 -65.8(3) . . . . ?
 Sm1 C2 C3 C12 124.9(4) . . . . ?
 Sm1 C2 C6 C7 114.6(4) . . . . ?
 Sm1 C2 C6 C11 -64.3(5) . . . . ?
 Sm1 C3 C4 C5 -64.9(3) . . . . ?
 Sm1 C3 C4 C18 129.4(4) . . . . ?
 Sm1 C3 C12 C13 176.1(3) . . . . ?
 Sm1 C3 C12 C17 -5.1(6) . . . . ?
 Sm1 C4 C5 C1 -72.9(3) . . . . ?
 Sm1 C4 C5 C24 94.3(4) . . . . ?
 Sm1 C4 C18 C19 55.0(5) . . . . ?
 Sm1 C4 C18 C23 -131.0(3) . . . . ?
 Sm1 C5 C24 C25 61.4(4) . . . . ?
 Sm1 C5 C24 C29 -114.0(4) . . . . ?
 Sm1 C30 C31 C32 -71.4(3) . . . . ?
 Sm1 C30 C31 C35 101.6(3) . . . . ?
 Sm1 C30 C34 C33 68.3(3) . . . . ?
 Sm1 C30 C34 C53 -117.6(4) . . . . ?
 Sm1 C31 C32 C33 -70.0(3) . . . . ?
 Sm1 C31 C32 C41 113.0(4) . . . . ?
 Sm1 C31 C35 C36 123.5(3) . . . . ?
 Sm1 C31 C35 C40 -49.3(4) . . . . ?
 Sm1 C32 C33 C34 -68.7(3) . . . . ?
 Sm1 C32 C33 C47 110.3(4) . . . . ?
 Sm1 C32 C41 C42 121.0(3) . . . . ?
 Sm1 C32 C41 C46 -58.4(4) . . . . ?
 Sm1 C33 C34 C30 -66.2(3) . . . . ?
 Sm1 C33 C34 C53 120.3(4) . . . . ?
 Sm1 C33 C47 C48 148.8(3) . . . . ?
 Sm1 C33 C47 C52 -33.7(5) . . . . ?
 Sm1 C34 C53 C54 125.8(3) . . . . ?
 Sm1 C34 C53 C58 -60.5(5) . . . . ?
 O1 C59 C60 C61 -32.4(5) . . . . ?
 C1 C2 C3 Sm1 64.9(3) . . . . ?
 C1 C2 C3 C4 -0.9(4) . . . . ?
 C1 C2 C3 C12 -170.2(4) . . . . ?
 C1 C2 C6 C7 28.3(6) . . . . ?
 C1 C2 C6 C11 -150.6(4) . . . . ?
 C1 C5 C24 C25 142.1(4) . . . . ?
 C1 C5 C24 C29 -33.3(6) . . . . ?
 C2 C1 C5 Sm1 -73.2(3) . . . . ?
 C2 C1 C5 C4 1.8(4) . . . . ?
 C2 C1 C5 C24 -166.0(3) . . . . ?
 C2 C3 C4 Sm1 66.9(3) . . . . ?
 C2 C3 C4 C5 2.0(4) . . . . ?
 C2 C3 C4 C18 -163.7(4) . . . . ?
 C2 C3 C12 C13 78.5(5) . . . . ?
 C2 C3 C12 C17 -102.7(5) . . . . ?
 C2 C6 C7 C8 -178.9(4) . . . . ?
 C2 C6 C11 C10 178.8(4) . . . . ?
 C3 C2 C6 C7 -148.5(4) . . . . ?
 C3 C2 C6 C11 32.6(6) . . . . ?
 C3 C4 C5 Sm1 70.6(3) . . . . ?
 C3 C4 C5 C1 -2.3(4) . . . . ?
 C3 C4 C5 C24 164.8(4) . . . . ?
 C3 C4 C18 C19 -49.2(6) . . . . ?
 C3 C4 C18 C23 124.8(4) . . . . ?
 C3 C12 C13 C14 -178.0(4) . . . . ?
 C3 C12 C17 C16 179.0(4) . . . . ?
 C4 C3 C12 C13 -89.1(5) . . . . ?
 C4 C3 C12 C17 89.7(5) . . . . ?
 C4 C5 C24 C25 -23.2(6) . . . . ?
 C4 C5 C24 C29 161.4(4) . . . . ?
 C4 C18 C19 C20 171.8(4) . . . . ?
 C4 C18 C23 C22 -173.0(4) . . . . ?
 C5 C1 C2 Sm1 68.4(3) . . . . ?
 C5 C1 C2 C3 -0.6(4) . . . . ?
 C5 C1 C2 C6 -177.9(3) . . . . ?
 C5 C4 C18 C19 147.7(4) . . . . ?
 C5 C4 C18 C23 -38.3(6) . . . . ?
 C5 C24 C25 C26 -174.6(4) . . . . ?
 C5 C24 C29 C28 174.6(4) . . . . ?
 C6 C2 C3 Sm1 -117.9(4) . . . . ?
 C6 C2 C3 C4 176.4(4) . . . . ?
 C6 C2 C3 C12 7.0(6) . . . . ?
 C6 C7 C8 C9 -0.1(7) . . . . ?
 C7 C6 C11 C10 -0.2(6) . . . . ?
 C7 C8 C9 C10 0.3(8) . . . . ?
 C8 C9 C10 C11 -0.5(8) . . . . ?
 C9 C10 C11 C6 0.4(7) . . . . ?
 C11 C6 C7 C8 0.1(6) . . . . ?
 C12 C3 C4 Sm1 -123.7(4) . . . . ?
 C12 C3 C4 C5 171.4(3) . . . . ?
 C12 C3 C4 C18 5.7(6) . . . . ?
 C12 C13 C14 C15 -1.3(7) . . . . ?
 C13 C12 C17 C16 -2.1(7) . . . . ?
 C13 C14 C15 C16 -1.5(7) . . . . ?
 C14 C15 C16 C17 2.6(8) . . . . ?
 C15 C16 C17 C12 -0.7(8) . . . . ?
 C17 C12 C13 C14 3.1(7) . . . . ?
 C18 C4 C5 Sm1 -124.0(4) . . . . ?
 C18 C4 C5 C1 163.1(4) . . . . ?
 C18 C4 C5 C24 -29.8(6) . . . . ?
 C18 C19 C20 C21 1.1(7) . . . . ?
 C19 C18 C23 C22 1.4(6) . . . . ?
 C19 C20 C21 C22 0.8(7) . . . . ?
 C20 C21 C22 C23 -1.5(7) . . . . ?
 C21 C22 C23 C18 0.4(7) . . . . ?
 C23 C18 C19 C20 -2.1(6) . . . . ?
 C24 C25 C26 C27 0.5(6) . . . . ?
 C25 C24 C29 C28 -0.9(6) . . . . ?
 C25 C26 C27 C28 -2.0(7) . . . . ?
 C26 C27 C28 C29 2.1(7) . . . . ?
 C27 C28 C29 C24 -0.7(7) . . . . ?
 C29 C24 C25 C26 1.0(6) . . . . ?
 C30 C31 C32 Sm1 70.2(3) . . . . ?
 C30 C31 C32 C33 0.3(4) . . . . ?
 C30 C31 C32 C41 -176.7(4) . . . . ?
 C30 C31 C35 C36 40.3(5) . . . . ?
 C30 C31 C35 C40 -132.5(4) . . . . ?
 C30 C34 C53 C54 -145.3(4) . . . . ?
 C30 C34 C53 C58 28.4(6) . . . . ?
 C31 C30 C34 Sm1 -69.7(3) . . . . ?
 C31 C30 C34 C33 -1.4(4) . . . . ?
 C31 C30 C34 C53 172.7(3) . . . . ?
 C31 C32 C33 Sm1 67.6(2) . . . . ?
 C31 C32 C33 C34 -1.1(4) . . . . ?
 C31 C32 C33 C47 177.8(4) . . . . ?
 C31 C32 C41 C42 32.0(6) . . . . ?
 C31 C32 C41 C46 -147.4(4) . . . . ?
 C31 C35 C36 C37 -172.6(4) . . . . ?
 C31 C35 C40 C39 171.4(4) . . . . ?
 C32 C31 C35 C36 -148.6(4) . . . . ?
 C32 C31 C35 C40 38.6(6) . . . . ?
 C32 C33 C34 Sm1 67.8(3) . . . . ?
 C32 C33 C34 C30 1.6(4) . . . . ?
 C32 C33 C34 C53 -171.9(4) . . . . ?
 C32 C33 C47 C48 59.4(6) . . . . ?
 C32 C33 C47 C52 -123.1(5) . . . . ?
 C32 C41 C42 C43 -176.4(4) . . . . ?
 C32 C41 C46 C45 176.9(4) . . . . ?
 C33 C32 C41 C42 -144.4(4) . . . . ?
 C33 C32 C41 C46 36.2(6) . . . . ?
 C33 C34 C53 C54 27.3(6) . . . . ?
 C33 C34 C53 C58 -159.0(4) . . . . ?
 C33 C47 C48 C49 175.3(4) . . . . ?
 C33 C47 C52 C51 -175.9(4) . . . . ?
 C34 C30 C31 Sm1 72.1(3) . . . . ?
 C34 C30 C31 C32 0.7(4) . . . . ?
 C34 C30 C31 C35 173.7(3) . . . . ?
 C34 C33 C47 C48 -121.7(4) . . . . ?
 C34 C33 C47 C52 55.8(6) . . . . ?
 C34 C53 C54 C55 174.8(4) . . . . ?
 C34 C53 C58 C57 -174.3(4) . . . . ?
 C35 C31 C32 Sm1 -101.7(4) . . . . ?
 C35 C31 C32 C33 -171.7(4) . . . . ?
 C35 C31 C32 C41 11.3(6) . . . . ?
 C35 C36 C37 C38 1.1(6) . . . . ?
 C36 C35 C40 C39 -1.5(6) . . . . ?
 C36 C37 C38 C39 -1.9(6) . . . . ?
 C37 C38 C39 C40 0.9(6) . . . . ?
 C38 C39 C40 C35 0.8(6) . . . . ?
 C40 C35 C36 C37 0.6(6) . . . . ?
 C41 C32 C33 Sm1 -115.5(4) . . . . ?
 C41 C32 C33 C34 175.8(4) . . . . ?
 C41 C32 C33 C47 -5.2(6) . . . . ?
 C41 C42 C43 C44 -1.7(6) . . . . ?
 C42 C41 C46 C45 -2.6(6) . . . . ?
 C42 C43 C44 C45 -0.5(6) . . . . ?
 C43 C44 C45 C46 1.0(6) . . . . ?
 C44 C45 C46 C41 0.6(6) . . . . ?
 C46 C41 C42 C43 3.1(6) . . . . ?
 C47 C33 C34 Sm1 -111.3(4) . . . . ?
 C47 C33 C34 C30 -177.5(3) . . . . ?
 C47 C33 C34 C53 9.0(6) . . . . ?
 C47 C48 C49 C50 1.4(7) . . . . ?
 C48 C47 C52 C51 1.7(7) . . . . ?
 C48 C49 C50 C51 0.1(7) . . . . ?
 C49 C50 C51 C52 -0.6(7) . . . . ?
 C50 C51 C52 C47 -0.3(7) . . . . ?
 C52 C47 C48 C49 -2.3(6) . . . . ?
 C53 C54 C55 C56 -0.2(6) . . . . ?
 C54 C53 C58 C57 -0.3(6) . . . . ?
 C54 C55 C56 C57 -1.2(7) . . . . ?
 C55 C56 C57 C58 1.9(7) . . . . ?
 C56 C57 C58 C53 -1.1(7) . . . . ?
 C58 C53 C54 C55 1.0(6) . . . . ?
 C59 O1 C62 C61 13.6(5) . . . . ?
 C59 C60 C61 C62 39.8(5) . . . . ?
 C60 C61 C62 O1 -33.2(5) . . . . ?
 C62 O1 C59 C60 12.0(5) . . . . ?

_shelx_res_file
;
    p21n_final.res created by SHELXL-2014/7

TITL P21N_final in P21/n #14
REM reset to P21/n #14
CELL 0.710693 10.323 40.667 11.096 90 105.38 90
ZERR 4 0.0021 0.0081 0.0022 0 0.03 0
LATT 1
SYMM 0.5-X,0.5+Y,0.5-Z
SFAC C H O Sm
DISP Sm -0.112 3.46
UNIT 248 200 4 4

L.S. 20
PLAN  20
SIZE 0.1 0.05 0.02
TEMP -173.15
BOND
MORE -1
BOND $H
CONF
fmap 2
acta 51
OMIT 3 3 1
OMIT 3 13 0
OMIT 3 6 2
OMIT 4 2 3
OMIT 2 4 0
OMIT 3 1 1
OMIT 4 4 2
REM <olex2.extras>
REM <HklSrc "%.\\P21N_final.HKL">
REM </olex2.extras>

WGHT    0.067000    2.490800
FVAR       0.25598
SM1   4    0.259417    0.881269    0.110400    11.00000    0.02070    0.01860 =
         0.03773    0.00555    0.00664    0.00338
O1    3    0.456255    0.907348    0.059163    11.00000    0.02335    0.02806 =
         0.04365    0.00956    0.00342   -0.00497
C1    1    0.470058    0.839183    0.216626    11.00000    0.01849    0.01683 =
         0.03051    0.00145    0.00223    0.00182
AFIX  43
H1    2    0.555417    0.849589    0.234066    11.00000   -1.20000
AFIX   0
C2    1    0.409817    0.821381    0.107138    11.00000    0.02442    0.01727 =
         0.02465    0.00191    0.00181    0.00450
C3    1    0.283542    0.809639    0.119160    11.00000    0.02330    0.01698 =
         0.02333    0.00076   -0.00062    0.00026
C4    1    0.268545    0.819958    0.236770    11.00000    0.01958    0.01638 =
         0.02321    0.00141    0.00220    0.00283
C5    1    0.384056    0.839147    0.296133    11.00000    0.02320    0.01518 =
         0.02477    0.00096    0.00065   -0.00005
C6    1    0.473191    0.815340    0.004113    11.00000    0.02511    0.01604 =
         0.03331    0.00207    0.01098    0.00342
C7    1    0.612394    0.813897    0.028122    11.00000    0.03234    0.02489 =
         0.03323   -0.00183    0.00450    0.00260
AFIX  43
H7    2    0.666225    0.816455    0.111480    11.00000   -1.20000
AFIX   0
C8    1    0.673761    0.808838   -0.066400    11.00000    0.03088    0.04180 =
         0.05143   -0.00568    0.02069    0.00024
AFIX  43
H8    2    0.768993    0.807987   -0.047713    11.00000   -1.20000
AFIX   0
C9    1    0.597677    0.805004   -0.187977    11.00000    0.06194    0.04018 =
         0.04391   -0.00559    0.02898   -0.00865
AFIX  43
H9    2    0.640044    0.801399   -0.253097    11.00000   -1.20000
AFIX   0
C10   1    0.459999    0.806438   -0.214226    11.00000    0.05159    0.03503 =
         0.02842   -0.00578    0.01202   -0.00825
AFIX  43
H10   2    0.407485    0.803970   -0.298101    11.00000   -1.20000
AFIX   0
C11   1    0.396919    0.811408   -0.120624    11.00000    0.03664    0.02779 =
         0.02926    0.00001    0.00624    0.00140
AFIX  43
H11   2    0.301617    0.812181   -0.140383    11.00000   -1.20000
AFIX   0
C12   1    0.195020    0.785445    0.034113    11.00000    0.02424    0.01623 =
         0.02526   -0.00286    0.00388   -0.00362
C13   1    0.224783    0.752342    0.045933    11.00000    0.03067    0.02323 =
         0.03061    0.00402   -0.00071    0.00419
AFIX  43
H13   2    0.299993    0.745121    0.110079    11.00000   -1.20000
AFIX   0
C14   1    0.147107    0.729398   -0.033952    11.00000    0.04112    0.01921 =
         0.03943   -0.00182   -0.00159   -0.00023
AFIX  43
H14   2    0.170738    0.706780   -0.025086    11.00000   -1.20000
AFIX   0
C15   1    0.036390    0.739116   -0.125693    11.00000    0.03470    0.02615 =
         0.03236   -0.00571    0.00602   -0.01001
AFIX  43
H15   2   -0.015524    0.723453   -0.181705    11.00000   -1.20000
AFIX   0
C16   1    0.001461    0.771927   -0.135516    11.00000    0.03119    0.03144 =
         0.03998    0.00055   -0.01016   -0.00310
AFIX  43
H16   2   -0.077049    0.778846   -0.196450    11.00000   -1.20000
AFIX   0
C17   1    0.081824    0.795191   -0.055501    11.00000    0.03507    0.01823 =
         0.04330   -0.00010   -0.01027    0.00045
AFIX  43
H17   2    0.057767    0.817791   -0.063397    11.00000   -1.20000
AFIX   0
C18   1    0.169681    0.806027    0.298341    11.00000    0.02999    0.01491 =
         0.03023   -0.00299    0.00841   -0.00201
C19   1    0.035149    0.801936    0.239143    11.00000    0.02861    0.02125 =
         0.04055   -0.00251    0.00886   -0.00104
AFIX  43
H19   2   -0.000445    0.810815    0.157891    11.00000   -1.20000
AFIX   0
C20   1   -0.048580    0.785092    0.296444    11.00000    0.02995    0.02591 =
         0.06122   -0.00842    0.01504   -0.00753
AFIX  43
H20   2   -0.140588    0.782215    0.253561    11.00000   -1.20000
AFIX   0
C21   1   -0.000381    0.772529    0.414177    11.00000    0.04502    0.02411 =
         0.06124   -0.00571    0.03214   -0.00922
AFIX  43
H21   2   -0.058544    0.760763    0.452252    11.00000   -1.20000
AFIX   0
C22   1    0.132936    0.776958    0.477717    11.00000    0.05132    0.02644 =
         0.03810   -0.00027    0.01957    0.00248
AFIX  43
H22   2    0.165993    0.768693    0.560260    11.00000   -1.20000
AFIX   0
C23   1    0.218856    0.793552    0.420650    11.00000    0.03598    0.02281 =
         0.03323   -0.00309    0.01314   -0.00415
AFIX  43
H23   2    0.310663    0.796473    0.464128    11.00000   -1.20000
AFIX   0
C24   1    0.401063    0.861274    0.404807    11.00000    0.02166    0.01562 =
         0.02632    0.00157    0.00571   -0.00197
C25   1    0.288763    0.874860    0.434633    11.00000    0.02397    0.02168 =
         0.02661    0.00074    0.00766   -0.00086
AFIX  43
H25   2    0.201157    0.868305    0.388985    11.00000   -1.20000
AFIX   0
C26   1    0.303971    0.897894    0.530525    11.00000    0.02569    0.02681 =
         0.03064   -0.00353    0.00999    0.00258
AFIX  43
H26   2    0.226807    0.906743    0.550052    11.00000   -1.20000
AFIX   0
C27   1    0.430563    0.907924    0.597303    11.00000    0.03655    0.02596 =
         0.02687   -0.00531    0.00687   -0.00219
AFIX  43
H27   2    0.441211    0.924130    0.660847    11.00000   -1.20000
AFIX   0
C28   1    0.542013    0.893848    0.569724    11.00000    0.03117    0.03017 =
         0.03536   -0.00776   -0.00236   -0.00468
AFIX  43
H28   2    0.629577    0.899991    0.616899    11.00000   -1.20000
AFIX   0
C29   1    0.527410    0.871166    0.475179    11.00000    0.02526    0.02400 =
         0.03135   -0.00321    0.00384    0.00017
AFIX  43
H29   2    0.605188    0.862074    0.457597    11.00000   -1.20000
AFIX   0
C30   1   -0.015302    0.896366    0.034537    11.00000    0.01655    0.02092 =
         0.02944   -0.00209    0.00270    0.00034
AFIX  43
H30   2   -0.071008    0.877898    0.036656    11.00000   -1.20000
AFIX   0
C31   1    0.034279    0.905354   -0.067501    11.00000    0.01551    0.02150 =
         0.02490    0.00058    0.00435    0.00333
C32   1    0.114966    0.934184   -0.032873    11.00000    0.01652    0.01570 =
         0.02387   -0.00025    0.00155    0.00298
C33   1    0.113350    0.942238    0.092516    11.00000    0.01909    0.01548 =
         0.02695    0.00032    0.00291    0.00243
C34   1    0.030364    0.918962    0.133014    11.00000    0.02171    0.02224 =
         0.02597    0.00380    0.00298    0.00427
C35   1    0.012729    0.883838   -0.177798    11.00000    0.02446    0.02009 =
         0.02302    0.00086   -0.00046    0.00250
C36   1   -0.111417    0.868159   -0.222786    11.00000    0.02150    0.01942 =
         0.03259    0.00328    0.00448    0.00203
AFIX  43
H36   2   -0.183474    0.873569   -0.188037    11.00000   -1.20000
AFIX   0
C37   1   -0.131148    0.844798   -0.317470    11.00000    0.03036    0.02340 =
         0.02811   -0.00129   -0.00010   -0.00484
AFIX  43
H37   2   -0.216589    0.834698   -0.347814    11.00000   -1.20000
AFIX   0
C38   1   -0.026642    0.836257   -0.367477    11.00000    0.04057    0.02213 =
         0.03015   -0.00326    0.00072    0.00329
AFIX  43
H38   2   -0.039485    0.819826   -0.430407    11.00000   -1.20000
AFIX   0
C39   1    0.096621    0.851637   -0.325869    11.00000    0.03617    0.02665 =
         0.02530    0.00086    0.00664    0.00424
AFIX  43
H39   2    0.168122    0.846009   -0.361057    11.00000   -1.20000
AFIX   0
C40   1    0.115823    0.875293   -0.232713    11.00000    0.02384    0.02027 =
         0.03071    0.00102    0.00478    0.00146
AFIX  43
H40   2    0.200521    0.885926   -0.205541    11.00000   -1.20000
AFIX   0
C41   1    0.180461    0.952754   -0.114666    11.00000    0.01985    0.01442 =
         0.02639   -0.00102    0.00212    0.00507
C42   1    0.121381    0.954587   -0.243506    11.00000    0.02587    0.02129 =
         0.02756   -0.00077    0.00329    0.00096
AFIX  43
H42   2    0.035885    0.944786   -0.277195    11.00000   -1.20000
AFIX   0
C43   1    0.184538    0.970362   -0.323330    11.00000    0.03411    0.02328 =
         0.02355   -0.00031    0.00319    0.00440
AFIX  43
H43   2    0.143376    0.970763   -0.410718    11.00000   -1.20000
AFIX   0
C44   1    0.306894    0.985427   -0.275711    11.00000    0.03351    0.02216 =
         0.03420   -0.00032    0.01361   -0.00290
AFIX  43
H44   2    0.350821    0.996116   -0.330009    11.00000   -1.20000
AFIX   0
C45   1    0.365029    0.984883   -0.148947    11.00000    0.02264    0.02247 =
         0.03358   -0.00107    0.00697   -0.00451
AFIX  43
H45   2    0.448763    0.995562   -0.115779    11.00000   -1.20000
AFIX   0
C46   1    0.303079    0.968989   -0.069318    11.00000    0.02056    0.02040 =
         0.02612   -0.00387    0.00079   -0.00013
AFIX  43
H46   2    0.344630    0.969093    0.018011    11.00000   -1.20000
AFIX   0
C47   1    0.185526    0.969443    0.171805    11.00000    0.01789    0.02110 =
         0.02500    0.00017    0.00618   -0.00200
C48   1    0.165388    1.002624    0.136666    11.00000    0.02726    0.02134 =
         0.03289   -0.00218    0.00556   -0.00063
AFIX  43
H48   2    0.108779    1.008213    0.056880    11.00000   -1.20000
AFIX   0
C49   1    0.227516    1.027165    0.217590    11.00000    0.02893    0.01851 =
         0.05381   -0.00316    0.01563   -0.00409
AFIX  43
H49   2    0.211478    1.049523    0.193418    11.00000   -1.20000
AFIX   0
C50   1    0.313030    1.019687    0.333693    11.00000    0.03179    0.03508 =
         0.04331   -0.01591    0.01147   -0.01162
AFIX  43
H50   2    0.355156    1.036756    0.388683    11.00000   -1.20000
AFIX   0
C51   1    0.336135    0.987110    0.368304    11.00000    0.03432    0.03915 =
         0.02948   -0.00609    0.00121   -0.00493
AFIX  43
H51   2    0.395164    0.981717    0.447180    11.00000   -1.20000
AFIX   0
C52   1    0.273396    0.962267    0.288225    11.00000    0.03427    0.02662 =
         0.02746   -0.00019    0.00261    0.00046
AFIX  43
H52   2    0.290442    0.939973    0.312932    11.00000   -1.20000
AFIX   0
C53   1   -0.017520    0.918423    0.247706    11.00000    0.01855    0.02503 =
         0.02270    0.00329    0.00111    0.00275
C54   1   -0.034857    0.946967    0.311604    11.00000    0.02378    0.03098 =
         0.02812    0.00244    0.00374    0.00289
AFIX  43
H54   2   -0.008730    0.967655    0.285933    11.00000   -1.20000
AFIX   0
C55   1   -0.090473    0.945154    0.413059    11.00000    0.02660    0.04441 =
         0.02847   -0.00327    0.00608    0.00386
AFIX  43
H55   2   -0.101570    0.964697    0.456156    11.00000   -1.20000
AFIX   0
C56   1   -0.129304    0.915642    0.451467    11.00000    0.02667    0.05533 =
         0.03059    0.00896    0.01141    0.00082
AFIX  43
H56   2   -0.165513    0.914643    0.521664    11.00000   -1.20000
AFIX   0
C57   1   -0.115452    0.887426    0.387536    11.00000    0.03044    0.04018 =
         0.03541    0.01413    0.00549    0.00335
AFIX  43
H57   2   -0.144689    0.866963    0.412227    11.00000   -1.20000
AFIX   0
C58   1   -0.059387    0.888696    0.287874    11.00000    0.02524    0.02970 =
         0.03304    0.00434    0.00643   -0.00026
AFIX  43
H58   2   -0.049027    0.868945    0.245669    11.00000   -1.20000
AFIX   0
C59   1    0.572486    0.924823    0.135075    11.00000    0.02761    0.03426 =
         0.04445    0.00737   -0.00698   -0.00392
AFIX  23
H59A  2    0.624501    0.910583    0.203223    11.00000   -1.20000
H59B  2    0.544221    0.944815    0.172252    11.00000   -1.20000
AFIX   0
C60   1    0.654983    0.933774    0.046717    11.00000    0.02133    0.03071 =
         0.06156    0.00260    0.00657   -0.00215
AFIX  23
H60A  2    0.751625    0.935288    0.090923    11.00000   -1.20000
H60B  2    0.625073    0.954910    0.004125    11.00000   -1.20000
AFIX   0
C61   1    0.627824    0.905332   -0.045115    11.00000    0.02567    0.03517 =
         0.07717   -0.00226    0.01709    0.00046
AFIX  23
H61A  2    0.646487    0.911444   -0.125235    11.00000   -1.20000
H61B  2    0.681665    0.885732   -0.010199    11.00000   -1.20000
AFIX   0
C62   1    0.481472    0.899621   -0.060822    11.00000    0.02829    0.02227 =
         0.05630    0.00074    0.01267   -0.00164
AFIX  23
H62A  2    0.427264    0.914019   -0.127221    11.00000   -1.20000
H62B  2    0.457955    0.876437   -0.083808    11.00000   -1.20000
AFIX   0
HKLF 4

REM  P21N_final in P21/n #14
REM R1 =  0.0513 for    8173 Fo > 4sig(Fo)  and  0.0835 for all   11632 data
REM    577 parameters refined using      0 restraints

END

WGHT      0.0670      2.4909

REM Highest difference peak  1.310,  deepest hole -1.418,  1-sigma level  0.121
Q1    1   0.2981  0.8820  0.2012  11.00000  0.05    1.31
Q2    1   0.3395  0.8826  0.0992  11.00000  0.05    1.13
Q3    1   0.2181  0.8810  0.0247  11.00000  0.05    1.05
Q4    1   0.1385  0.8697  0.0983  11.00000  0.05    0.85
Q5    1   0.1589  0.8956  0.1359  11.00000  0.05    0.83
Q6    1   0.2726  0.9012  0.1237  11.00000  0.05    0.82
Q7    1   0.2479  0.9035  0.1370  11.00000  0.05    0.72
Q8    1   0.2751  0.8594  0.0846  11.00000  0.05    0.69
Q9    1   0.1846  0.8832  0.1533  11.00000  0.05    0.69
Q10   1   0.1409  0.9196  0.1106  11.00000  0.05    0.62
Q11   1   0.0852  0.8721  0.1038  11.00000  0.05    0.59
Q12   1   0.2459  0.8605  0.1530  11.00000  0.05    0.59
Q13   1   0.3473  0.9166  0.0328  11.00000  0.05    0.54
Q14   1   0.1589  0.8394  0.1397  11.00000  0.05    0.53
Q15   1   0.2939  0.8789  0.5081  11.00000  0.05    0.52
Q16   1   0.4247  0.8525  0.1525  11.00000  0.05    0.51
Q17   1   0.0242  0.9182  0.1926  11.00000  0.05    0.51
Q18   1   0.1940  0.9886  0.1488  11.00000  0.05    0.49
Q19   1   0.3526  0.8621  0.4440  11.00000  0.05    0.48
Q20   1   0.1641  0.7673  0.0429  11.00000  0.05    0.48
;
_shelx_res_checksum               92092
_shelx_hkl_file
;
   0   0   1    3.19    2.08
   0   0   1    2.88    1.14
   0   0  -1   -1.01    1.48
   0   0  -1   -0.05    1.21
   0   0   2  270.20   22.13
   0   0   2  305.70   25.38
   0   0  -2  291.60   24.07
   0   0  -2  296.30   24.26
   0   0   3    3.49    6.45
   0   0   3    3.41    3.30
   0   0  -3    4.60    4.05
   0   0  -3   -2.27    4.55
   0   0   4 2077.00  167.30
   0   0   4 1486.00  119.50
   0   0  -4 1948.00  156.50
   0   0  -4 1678.00  135.10
   0   0   5   -4.78   10.26
   0   0   5   -2.64    6.25
   0   0  -5    5.25    7.47
   0   0  -5   -6.70    6.40
   0   0   6 1082.00   87.68
   0   0   6 1127.00   92.45
   0   0  -6 1116.00   90.62
   0   0  -6 1247.00  101.10
   0   0   7   29.46   15.18
   0   0   7   -1.65    9.95
   0   0  -7    4.52    9.31
   0   0  -7   -5.00   10.13
   0   0   8  189.40   25.71
   0   0   8  198.10   21.01
   0   0  -8  178.30   19.34
   0   0  -8  154.60   18.46
   0   0   9  -22.88   22.36
   0   0   9    4.28   14.14
   0   0  -9    8.17   11.59
   0   0  -9   16.05   13.35
   0   0  10  166.70   21.21
   0   0  10  151.70   27.47
   0   0 -10  141.70   19.50
   0   0 -10  131.40   17.81
   0   0  11   26.93   14.66
   0   0  11  -33.52   28.22
   0   0 -11    2.81   15.14
   0   0 -11    3.64   15.65
   0   0  12  182.50   22.81
   0   0  12  167.80   33.72
   0   0 -12  155.90   24.06
   0   0 -12  193.40   23.34
   0   0  13  -37.72   28.40
   0   0  13  -10.24   19.16
   0   0 -13    0.32   16.92
   0   0 -13   12.67   25.70
   0   0  14   73.12   29.15
   0   0  14  101.50   30.45
   0   0 -14  133.60   25.50
   0   0 -14  107.60   37.07
   0  -1   0    0.06    0.36
   0   1   0   -0.11    0.32
   0  -1   1 3457.00  276.30
   0  -1   1 3414.00  272.80
   0  -1  -1 3032.00  242.30
   0  -1  -1 3495.00  279.30
   0   1   1 3357.00  268.30
   0   1   1 3935.00  314.40
   0   1  -1 3280.00  262.10
   0   1  -1 3319.00  265.30
   0  -1   2  101.60    9.09
   0  -1   2   98.74    9.48
   0  -1  -2   83.47    8.32
   0  -1  -2   84.56    7.90
   0   1   2   86.11    8.36
   0   1   2   95.02    8.62
   0   1  -2   98.25    9.53
   0   1  -2   83.72    7.88
   0  -1   3  115.80   10.95
   0  -1   3  130.00   12.27
   0  -1  -3   96.36    9.57
   0  -1  -3  138.30   13.24
   0   1   3   96.05   10.29
   0   1   3  100.80    9.45
   0   1  -3   88.76    9.58
   0   1  -3  109.90   10.32
   0  -1   4  168.40   16.06
   0  -1   4  133.20   13.04
   0  -1  -4  155.60   15.30
   0  -1  -4  126.50   12.66
   0   1   4  154.80   15.44
   0   1   4  153.00   13.73
   0   1  -4  135.10   12.42
   0   1  -4  144.00   14.39
   0  -1   5 1245.00  101.00
   0  -1   5 1376.00  111.00
   0  -1  -5 1418.00  114.30
   0  -1  -5 1182.00   96.04
   0   1   5 1288.00  104.50
   0   1   5 1075.00   87.05
   0   1  -5 1088.00   88.57
   0   1  -5 1301.00  105.10
   0  -1   6  987.40   80.36
   0  -1   6 1122.00   91.98
   0  -1  -6 1060.00   86.24
   0  -1  -6  875.50   71.61
   0   1   6 1176.00   95.25
   0   1   6 1109.00   90.67
   0   1  -6  941.10   76.56
   0   1  -6 1012.00   82.66
   0  -1   7   58.89   16.11
   0  -1   7   58.46    9.15
   0  -1  -7   58.72   11.66
   0  -1  -7   69.30   13.37
   0   1   7   38.94   16.18
   0   1   7   41.27   11.48
   0   1  -7   50.82   10.85
   0   1  -7   53.72   11.85
   0  -1   8    9.85    9.97
   0  -1   8   -0.38   16.88
   0  -1  -8   15.22   15.20
   0  -1  -8   15.54    8.90
   0   1   8    5.77   18.32
   0   1   8   25.08   12.77
   0   1  -8   -1.21   12.15
   0   1  -8   13.68   15.24
   0  -1   9  274.70   27.61
   0  -1   9  217.70   26.61
   0  -1  -9  274.90   25.44
   0  -1  -9  257.50   27.95
   0   1   9  146.00   18.75
   0   1   9  207.80   28.83
   0   1  -9  224.20   25.92
   0   1  -9  220.10   21.96
   0  -1  10   84.73   18.37
   0  -1  10   53.14   21.08
   0  -1 -10   99.21   20.54
   0  -1 -10  105.00   17.77
   0   1  10   62.95   22.84
   0   1  10   73.24   13.81
   0   1 -10   99.33   14.36
   0   1 -10   70.15   17.59
   0  -1  11   25.27   18.41
   0  -1  11    8.58   23.68
   0  -1 -11   21.61   17.49
   0  -1 -11   18.07   17.67
   0   1  11   36.18   28.51
   0   1  11   27.12   14.00
   0   1 -11   56.14   13.78
   0   1 -11   27.98   14.73
   0  -1  12   34.75   16.28
   0  -1  12  114.20   28.64
   0  -1 -12   71.11   20.94
   0  -1 -12   44.60   19.15
   0   1  12   81.03   18.30
   0   1  12   49.29   31.56
   0   1 -12  101.10   21.17
   0   1 -12  128.10   18.25
   0  -1  13   27.15   19.13
   0  -1  13   17.52   26.18
   0  -1 -13   45.68   25.37
   0  -1 -13   23.39   19.31
   0   1  13   47.31   29.70
   0   1  13   38.48   19.86
   0   1 -13   -9.97   28.21
   0   1 -13   34.97   17.29
   0  -1  14   19.28   33.00
   0  -1  14   -2.95   27.30
   0  -1 -14  -19.21   33.37
   0  -1 -14   -5.87   22.14
   0   1  14   14.89   25.28
   0   1  14   15.70   27.09
   0   1 -14   -6.27   31.54
   0   1 -14   12.10   22.40
   0   2   0  121.80   10.01
   0   2   0  104.90    8.52
   0  -2   1 2578.00  206.20
   0  -2   1 2448.00  195.70
   0  -2  -1 2371.00  189.60
   0  -2  -1 2249.00  179.90
   0   2   1 2354.00  188.20
   0   2   1 2542.00  203.30
   0   2  -1 2459.00  196.60
   0   2  -1 2011.00  160.90
   0  -2   2  411.10   33.33
   0  -2   2  396.50   32.42
   0  -2  -2  408.20   33.38
   0  -2  -2  438.00   35.55
   0   2   2  433.10   35.16
   0   2   2  378.80   31.12
   0   2  -2  357.30   29.19
   0   2  -2  428.20   35.05
   0  -2   3 2660.00  213.00
   0  -2   3 2748.00  220.30
   0  -2  -3 2326.00  186.30
   0  -2  -3 2504.00  200.80
   0   2   3 2918.00  233.70
   0   2   3 2732.00  219.00
   0   2  -3 2631.00  211.00
   0   2  -3 2995.00  239.80
   0  -2   4  296.40   25.35
   0  -2   4  348.30   30.07
   0  -2  -4  351.80   30.34
   0  -2  -4  361.80   30.27
   0   2   4  313.60   26.63
   0   2   4  345.50   29.28
   0   2  -4  267.90   23.06
   0   2  -4  288.50   25.27
   0  -2   5    7.93    7.21
   0  -2   5   16.31    8.92
   0  -2  -5    9.86    6.95
   0  -2  -5    3.36    7.51
   0   2   5   10.05    5.50
   0   2   5   11.65    9.60
   0   2  -5    1.83    6.37
   0   2  -5   -4.09    6.89
   0  -2   6   -0.53   10.66
   0  -2   6    7.78    9.15
   0  -2  -6   -0.71    7.91
   0  -2  -6  -10.25   10.03
   0   2   6    6.30    6.45
   0   2   6   -2.47    8.63
   0   2  -6   15.76   10.54
   0   2  -6    5.19    7.29
   0  -2   7 1181.00   97.30
   0  -2   7 1424.00  115.10
   0  -2  -7 1212.00   98.61
   0  -2  -7 1297.00  105.90
   0   2   7 1131.00   92.25
   0   2   7 1318.00  108.10
   0   2  -7 1271.00  103.50
   0   2  -7 1301.00  106.20
   0  -2   8   14.53   17.16
   0  -2   8    4.90   11.66
   0  -2  -8   -6.80   14.00
   0  -2  -8    8.95   11.21
   0   2   8    3.93   16.03
   0   2   8   -6.58   10.77
   0   2  -8   -0.48    8.85
   0   2  -8    1.07   13.86
   0  -2   9    9.89   22.17
   0  -2   9   13.11   10.30
   0  -2  -9   17.40   14.83
   0  -2  -9   17.87   13.22
   0   2   9   -2.16   21.68
   0   2   9    7.54   15.48
   0   2  -9   -9.91   15.70
   0   2  -9    3.40   12.54
   0  -2  10   -6.34   23.65
   0  -2  10    1.50   14.93
   0  -2 -10   13.24   10.95
   0  -2 -10   -4.49   18.56
   0   2  10    6.17   21.14
   0   2  10   17.81   16.42
   0   2 -10    3.73   15.41
   0   2 -10   -1.82   18.21
   0  -2  11  489.50   47.29
   0  -2  11  396.60   38.63
   0  -2 -11  411.70   37.75
   0  -2 -11  508.50   47.10
   0   2  11  431.60   39.85
   0   2  11  450.50   45.24
   0   2 -11  526.50   46.67
   0   2 -11  485.10   43.75
   0  -2  12   32.56   24.31
   0  -2  12   -8.86   14.99
   0  -2 -12   -1.69   21.27
   0  -2 -12   12.48   19.59
   0   2  12    8.54   15.80
   0   2  12   36.61   31.85
   0   2 -12   -2.38   15.39
   0   2 -12   23.37   18.60
   0  -2  13    7.87   26.41
   0  -2  13   23.35   19.32
   0  -2 -13   26.68   20.07
   0  -2 -13    0.07   25.10
   0   2  13   28.22   30.27
   0   2  13   30.41   20.46
   0   2 -13   23.61   17.00
   0   2 -13   -1.28   28.92
   0  -2  14   -7.66   27.39
   0  -2  14  -26.80   34.12
   0  -2 -14    7.18   30.44
   0  -2 -14    9.98   21.63
   0   2  14  -45.30   27.11
   0   2  14  -27.69   25.04
   0   2 -14   -6.80   22.45
   0   2 -14  -29.82   25.61
   0  -3   0    2.69    1.19
   0  -3   0    1.97    1.98
   0   3   0   -0.10    1.15
   0   3   0   -0.30    1.83
   0  -3   1  714.90   57.35
   0  -3   1  646.90   52.05
   0  -3  -1  728.50   58.55
   0  -3  -1  742.70   59.66
   0   3   1  706.00   56.76
   0   3   1  692.90   55.74
   0   3  -1  670.10   53.79
   0   3  -1  686.90   55.24
   0  -3   2 3117.00  249.30
   0  -3   2 3395.00  271.70
   0  -3  -2 3502.00  280.20
   0  -3  -2 3715.00  297.10
   0   3   2 3716.00  297.20
   0   3   2 3639.00  291.20
   0   3  -2 3603.00  288.30
   0   3  -2 3814.00  305.00
   0  -3   3  235.50   20.54
   0  -3   3  268.90   22.40
   0  -3  -3  307.10   25.48
   0  -3  -3  271.40   23.28
   0   3   3  272.70   23.35
   0   3   3  278.00   23.44
   0   3  -3  240.70   20.45
   0   3  -3  235.20   20.60
   0  -3   4  163.40   16.50
   0  -3   4  161.70   14.69
   0  -3  -4  119.80   13.53
   0  -3  -4  170.00   15.13
   0   3   4  169.50   16.11
   0   3   4  136.30   13.33
   0   3  -4  155.50   15.53
   0   3  -4  134.80   12.39
   0  -3   5  226.70   22.25
   0  -3   5  213.10   18.70
   0  -3  -5  168.50   15.68
   0  -3  -5  207.50   20.17
   0   3   5  162.60   16.42
   0   3   5  195.20   19.01
   0   3  -5  213.00   18.81
   0  -3   6 1155.00   93.72
   0  -3   6 1230.00  100.60
   0  -3  -6 1084.00   87.98
   0  -3  -6 1238.00  100.80
   0   3   6 1047.00   85.55
   0   3   6 1069.00   86.79
   0   3  -6 1081.00   87.88
   0   3  -6 1123.00   91.71
   0  -3   7   25.36   14.85
   0  -3   7   12.53    9.43
   0  -3  -7   -0.61    7.44
   0  -3  -7  -12.51   12.64
   0   3   7    1.19    9.91
   0   3   7   23.07   11.66
   0   3  -7   17.28   11.01
   0   3  -7  -17.45   13.08
   0  -3   8   93.61   21.32
   0  -3   8   72.32   10.47
   0  -3  -8   88.42   14.97
   0   3   8   81.17   20.96
   0   3  -8   60.37   15.65
   0   3  -8   75.72   12.70
   0  -3   9  428.20   41.13
   0  -3   9  351.40   32.92
   0  -3  -9  391.10   36.52
   0  -3  -9  383.10   34.01
   0   3   9  335.80   35.78
   0   3   9  334.80   30.66
   0   3  -9  385.10   35.89
   0   3  -9  312.70   29.55
   0  -3  10   85.61   25.47
   0  -3  10   48.03   12.81
   0  -3 -10   68.65   17.01
   0  -3 -10   69.04   16.61
   0   3  10  109.80   26.03
   0   3  10   52.51   17.71
   0   3 -10   80.85   19.84
   0   3 -10   49.16   14.03
   0  -3  11   30.40   18.89
   0  -3  11   22.35   27.38
   0  -3 -11  -11.61   20.15
   0  -3 -11    5.01   12.43
   0   3  11    7.18   21.47
   0   3  11   18.01   19.34
   0   3 -11    4.15   17.81
   0   3 -11  -13.40   17.60
   0  -3  12   95.68   17.64
   0  -3  12  110.50   27.84
   0  -3 -12  124.20   25.99
   0  -3 -12   90.68   21.77
   0   3  12   93.30   31.37
   0   3  12   66.94   17.83
   0   3 -12  106.10   21.29
   0   3 -12  121.00   22.04
   0  -3  13   45.72   21.73
   0  -3  13   23.99   25.11
   0  -3 -13    7.78   25.33
   0  -3 -13   15.20   17.89
   0   3  13   25.85   19.94
   0   3  13   37.55   31.48
   0   3 -13  -17.76   29.15
   0   3 -13   31.40   20.69
   0  -3  14    5.31   27.29
   0  -3  14    8.75   32.17
   0  -3 -14   23.42   22.88
   0  -3 -14   12.38   28.47
   0   3  14   33.65   26.89
   0   3  14   -4.29   26.19
   0   3 -14  -10.87   22.28
   0   3 -14    7.73   23.40
   0  -4   0 5544.00  442.90
   0  -4   0 5460.00  436.30
   0  -4   1    2.65    2.57
   0  -4   1    0.92    1.89
   0  -4  -1    1.71    2.88
   0  -4  -1   -4.02    2.76
   0   4   1    1.82    2.06
   0   4   1   -0.21    2.74
   0   4  -1    2.69    1.82
   0   4  -1    3.53    2.90
   0  -4   2  604.40   49.02
   0  -4   2  504.80   40.87
   0  -4  -2  482.00   39.16
   0  -4  -2  462.10   37.71
   0   4   2  482.20   39.36
   0   4   2  418.10   34.09
   0   4  -2  487.40   39.53
   0   4  -2  558.90   45.50
   0  -4   3  124.50   12.66
   0  -4  -3  143.50   12.95
   0  -4  -3  133.20   13.20
   0   4   3  114.50   11.86
   0   4   3  118.60   11.50
   0   4  -3   94.76    8.86
   0   4  -3  102.50   11.00
   0  -4   4  832.40   67.47
   0  -4   4  977.50   79.51
   0  -4  -4  974.80   79.33
   0  -4  -4  944.70   76.44
   0   4   4  784.10   63.87
   0   4   4  938.70   76.41
   0   4  -4 1033.00   83.56
   0   4  -4  870.30   71.00
   0  -4   5  496.80   42.53
   0  -4   5  480.20   40.04
   0  -4  -5  577.20   48.15
   0  -4  -5  527.00   43.78
   0   4   5  514.80   42.62
   0   4   5  530.70   44.90
   0   4  -5  534.60   44.20
   0   4  -5  549.70   45.70
   0  -4   6  849.30   69.33
   0  -4   6 1023.00   84.22
   0  -4  -6  978.80   79.65
   0  -4  -6  915.40   75.44
   0   4   6  929.50   76.24
   0   4   6  803.60   65.94
   0   4  -6  948.30   77.12
   0   4  -6  880.80   72.59
   0  -4   7   17.12   10.32
   0  -4   7   -9.49   15.02
   0  -4  -7   20.68   12.56
   0  -4  -7   -4.33    9.88
   0   4   7   -0.59    8.97
   0   4   7   11.33   11.12
   0   4  -7   -5.84   10.70
   0   4  -7  -12.27   11.38
   0  -4   8  200.60   20.68
   0  -4   8  233.70   28.66
   0  -4  -8  220.30   21.26
   0   4   8  264.90   26.21
   0   4  -8  254.10   26.67
   0  -4   9   21.75   11.36
   0  -4   9    9.66   20.73
   0  -4  -9    3.48   13.07
   0  -4  -9    9.85   16.39
   0   4   9   11.28   20.47
   0   4   9    1.65   16.22
   0   4  -9   -2.21   17.11
   0   4  -9   16.32   12.17
   0  -4  10  295.70   28.88
   0  -4  10  296.70   34.49
   0  -4 -10  320.30   31.28
   0  -4 -10  250.00   26.56
   0   4  10  305.60   29.38
   0   4  10  274.60   34.43
   0   4 -10  294.10   29.78
   0   4 -10  299.10   29.17
   0  -4  11   -2.61   17.86
   0  -4  11  -12.13   26.46
   0  -4 -11   15.03   20.23
   0  -4 -11   10.11   13.20
   0   4  11   -4.12   20.77
   0   4  11  -23.94   25.48
   0   4 -11   -1.38   14.06
   0   4 -11   -6.42   20.26
   0  -4  12   15.19   15.45
   0  -4  12    8.34   32.28
   0  -4 -12   19.72   24.36
   0  -4 -12   50.61   20.50
   0   4  12    1.13   28.59
   0   4  12    3.20   19.00
   0   4 -12   37.02   19.32
   0   4 -12   32.59   19.05
   0  -4  13   22.97   21.76
   0  -4  13   23.40   25.91
   0  -4 -13   11.91   25.74
   0  -4 -13   15.32   17.71
   0   4  13    6.88   20.67
   0   4  13   -4.74   31.09
   0   4 -13   -5.92   27.80
   0   4 -13   11.08   22.53
   0  -4  14   71.02   28.83
   0  -4  14   81.27   27.57
   0  -4 -14   87.03   26.04
   0  -4 -14  109.80   27.99
   0   4  14  121.10   29.59
   0   4  14   85.18   29.44
   0   4 -14   66.33   23.87
   0   4 -14   96.92   29.42
   0  -5   0    0.76    3.09
   0  -5   0   -3.10    1.98
   0   5   0    1.87    2.80
   0   5   0   -0.86    1.85
   0  -5   1  593.20   47.74
   0  -5   1  556.20   45.04
   0  -5  -1  546.50   44.09
   0  -5  -1  491.40   39.87
   0   5   1  508.30   41.21
   0   5   1  529.00   42.76
   0   5  -1  460.30   37.15
   0   5  -1  510.30   41.32
   0  -5   2 2181.00  174.90
   0  -5   2 1916.00  153.50
   0  -5  -2 2203.00  176.50
   0  -5  -2 2520.00  201.90
   0   5   2 2086.00  167.20
   0   5   2 2110.00  169.20
   0   5  -2 1894.00  151.70
   0   5  -2 2041.00  163.60
   0  -5   3  659.70   53.50
   0  -5   3  744.90   60.76
   0  -5  -3  575.90   46.80
   0  -5  -3  741.40   60.49
   0   5   3  680.20   55.41
   0   5   3  570.60   46.69
   0   5  -3  668.10   54.21
   0   5  -3  561.20   46.09
   0  -5   4   49.67    6.61
   0  -5   4   51.24   10.06
   0  -5  -4   62.01    8.38
   0  -5  -4   64.79   10.02
   0   5   4   37.22    7.48
   0   5   4   39.09    9.65
   0   5  -4   56.81    6.89
   0   5  -4   67.61   10.71
   0  -5   5  418.40   34.84
   0  -5  -5  391.90   33.05
   0   5   5  539.90   44.96
   0   5   5  592.00   49.42
   0   5  -5  487.70   40.70
   0   5  -5  534.50   45.14
   0  -5   6  368.50   31.68
   0  -5   6  331.30   30.13
   0  -5  -6  378.40   32.16
   0  -5  -6  393.30   35.15
   0   5   6  444.00   37.93
   0   5   6  416.70   35.90
   0   5  -6  314.60   29.00
   0   5  -6  383.50   33.01
   0  -5   7   21.37   15.35
   0  -5   7   13.01    9.19
   0  -5  -7    7.66   11.02
   0  -5  -7   11.67    9.44
   0   5   7    4.66    7.93
   0   5   7   -3.35   14.80
   0   5  -7    8.58   10.71
   0   5  -7   12.84    9.98
   0  -5   8  104.90   20.56
   0  -5   8  106.40   12.83
   0  -5  -8   88.95   15.50
   0  -5  -8   82.77   13.81
   0   5   8  108.50   22.38
   0   5   8   73.96   13.41
   0   5  -8   69.44   14.63
   0   5  -8   70.64   15.92
   0  -5   9  146.90   25.82
   0  -5   9  119.10   16.47
   0  -5  -9  157.30   18.57
   0  -5  -9  132.20   18.26
   0   5   9  150.90   19.68
   0   5   9  166.00   25.40
   0   5  -9  184.00   22.25
   0   5  -9  135.90   18.68
   0  -5  10   77.00   17.94
   0  -5  10  116.50   28.50
   0  -5 -10   97.06   20.93
   0  -5 -10   98.14   14.48
   0   5  10   92.17   23.72
   0   5  10  116.50   20.16
   0   5 -10  121.50   17.97
   0   5 -10  102.40   16.54
   0  -5  11   26.56   15.86
   0  -5  11   -4.51   20.50
   0  -5 -11   24.49   15.83
   0  -5 -11   28.68   16.50
   0   5  11   13.69   20.65
   0   5  11  -21.79   27.70
   0   5 -11   46.97   22.48
   0   5 -11    2.53   16.39
   0  -5  12   57.38   16.57
   0  -5  12   38.06   33.23
   0  -5 -12   52.54   19.99
   0  -5 -12   67.91   25.16
   0   5  12   13.65   26.99
   0   5  12   23.24   21.91
   0   5 -12   45.34   15.95
   0   5 -12   18.20   19.61
   0  -5  13   64.52   32.65
   0  -5  13   62.78   25.59
   0  -5 -13   62.12   18.74
   0  -5 -13   70.87   25.40
   0   5  13   71.49   30.63
   0   5  13   64.02   21.61
   0   5 -13   97.76   26.68
   0   5 -13   52.56   23.08
   0  -5  14   29.15   28.69
   0  -5  14   15.84   22.63
   0  -5 -14    0.70   28.41
   0  -5 -14   30.46   25.48
   0   5  14   45.01   27.87
   0   5  14   30.36   33.96
   0   5 -14  -16.89   29.78
   0   5 -14  -26.60   27.20
   0  -6   0  431.40   35.23
   0  -6   0  530.70   42.80
   0   6   0  568.10   46.02
   0   6   0  530.70   42.76
   0   6   0  499.70   40.60
   0  -6   1  433.60   35.42
   0  -6   1  398.20   32.25
   0  -6  -1  463.70   37.58
   0  -6  -1  385.70   31.63
   0   6   1  360.50   29.41
   0   6   1  407.80   33.42
   0   6  -1  460.50   37.26
   0   6  -1  403.20   32.96
   0  -6   2 4328.00  346.30
   0  -6   2 5275.00  421.70
   0  -6  -2 4245.00  339.60
   0  -6  -2 4138.00  330.90
   0   6   2 3711.00  297.10
   0   6   2 4389.00  351.20
   0   6  -2 5058.00  404.40
   0   6  -2 4133.00  330.70
   0  -6   3 2083.00  167.10
   0  -6   3 1954.00  157.10
   0  -6  -3 2016.00  161.90
   0  -6  -3 1756.00  141.00
   0   6   3 2053.00  164.70
   0   6   3 1752.00  140.90
   0   6  -3 2228.00  178.80
   0   6  -3 1799.00  144.30
   0  -6   4   26.12    8.42
   0  -6   4   30.16    5.54
   0  -6  -4   32.52    6.66
   0  -6  -4   28.89    8.59
   0   6   4   44.28    8.03
   0   6   4   41.60    9.25
   0   6  -4   25.55    8.56
   0   6  -4   34.89    6.97
   0  -6   5  351.20   29.85
   0  -6   5  305.50   27.51
   0  -6  -5  307.00   26.09
   0  -6  -5  283.50   25.53
   0   6   5  321.40   27.66
   0   6   5  318.60   27.90
   0   6  -5  291.80   26.06
   0   6  -5  295.10   25.89
   0  -6   6  328.70   30.85
   0  -6   6  288.50   25.48
   0  -6  -6  271.20   25.73
   0  -6  -6  283.30   25.24
   0   6   6  292.00   27.01
   0   6   6  343.10   30.39
   0   6  -6  252.20   23.07
   0   6  -6  283.90   26.95
   0  -6   7 1053.00   87.34
   0  -6   7 1262.00  102.20
   0  -6  -7  950.10   77.79
   0  -6  -7 1030.00   84.36
   0   6   7 1200.00   98.69
   0   6   7  963.90   78.96
   0   6  -7 1126.00   92.38
   0   6  -7 1085.00   88.70
   0  -6   8   -6.99   12.29
   0  -6   8  -26.75   18.60
   0  -6  -8   19.28   15.72
   0  -6  -8    2.56    9.44
   0   6   8   14.94   13.71
   0   6   8    6.77   14.14
   0   6  -8    0.28   12.09
   0   6  -8   14.90   15.56
   0  -6   9   30.45   20.16
   0  -6   9   -4.85   13.12
   0  -6  -9    2.36   16.10
   0  -6  -9   20.04   10.13
   0   6   9   -8.31   16.27
   0   6   9    6.45   15.32
   0   6  -9    5.92   12.87
   0   6  -9    3.58   14.02
   0  -6  10   11.78   15.93
   0  -6  10   20.80   19.70
   0  -6 -10   14.50   11.23
   0  -6 -10    2.74   18.58
   0   6  10   20.92   19.62
   0   6  10   39.22   19.79
   0   6 -10   15.40   15.94
   0   6 -10   24.52   18.13
   0  -6  11  188.30   21.85
   0  -6  11  130.70   30.15
   0  -6 -11  167.20   21.69
   0  -6 -11  183.20   23.94
   0   6  11  170.20   32.60
   0   6  11  226.60   26.36
   0   6 -11  187.50   28.20
   0   6 -11  179.90   24.21
   0  -6  12   29.14   16.18
   0  -6  12   38.28   29.39
   0  -6 -12   -0.86   24.07
   0  -6 -12   13.02   18.43
   0   6  12    5.65   23.40
   0   6  12  -35.50   26.65
   0   6 -12   15.83   20.64
   0   6 -12    7.58   14.29
   0  -6  13   38.03   26.80
   0  -6  13   11.61   36.07
   0  -6 -13   21.59   23.06
   0  -6 -13   23.14   17.26
   0   6  13    2.71   27.56
   0   6  13   23.31   21.16
   0   6 -13   -1.92   20.42
   0   6 -13    4.41   21.79
   0  -6  14    2.79   22.30
   0  -6  14   22.93   29.81
   0  -6 -14   27.45   29.30
   0  -6 -14   21.13   24.85
   0   6  14  -36.66   35.46
   0   6  14   48.53   33.56
   0   6 -14   23.33   33.84
   0   6 -14    2.94   29.97
   0  -7   0   -0.10    4.20
   0  -7   0   -0.45    2.63
   0   7   0   -1.32    2.68
   0   7   0   -1.07    4.31
   0   7   0    0.07    4.06
   0  -7   1  276.90   22.67
   0  -7   1  266.70   22.53
   0  -7  -1  284.50   23.41
   0  -7  -1  271.10   22.54
   0   7   1  297.90   24.99
   0   7   1  230.40   19.31
   0   7  -1  284.40   23.76
   0   7  -1  249.80   20.61
   0  -7   2 1278.00  102.60
   0  -7   2 1317.00  106.00
   0  -7  -2 1340.00  107.70
   0  -7  -2 1329.00  106.90
   0   7   2 1461.00  117.40
   0   7   2 1136.00   91.53
   0   7  -2 1371.00  110.10
   0   7  -2 1525.00  122.60
   0  -7   3   38.01    8.06
   0  -7   3   65.94    7.80
   0  -7  -3   68.53    8.13
   0  -7  -3   57.29    8.87
   0   7   3   60.17    8.28
   0   7   3   55.49    8.27
   0   7  -3   39.78    7.64
   0   7  -3   51.27    6.44
   0  -7   4  564.20   46.27
   0  -7   4  565.60   47.35
   0  -7  -4  627.60   51.88
   0  -7  -4  641.90   52.39
   0   7   4  647.60   53.55
   0   7   4  654.80   53.80
   0   7  -4  730.40   59.92
   0   7  -4  678.40   55.26
   0  -7   5  168.40   17.68
   0  -7   5  229.70   21.26
   0  -7  -5  180.70   18.79
   0  -7  -5  159.90   15.21
   0   7   5  196.70   19.37
   0   7   5  155.70   16.51
   0   7  -5  178.60   17.85
   0   7  -5  131.10   13.74
   0  -7   6  474.10   41.79
   0  -7   6  373.00   31.95
   0  -7  -6  447.00   37.91
   0  -7  -6  371.50   32.89
   0   7   6  442.50   39.10
   0   7   6  464.70   39.63
   0   7  -6  496.60   42.97
   0   7  -6  466.90   39.37
   0  -7   7   21.83   10.21
   0  -7   7    5.54   18.05
   0  -7  -7    7.62   10.02
   0  -7  -7    8.16   12.74
   0   7   7   23.28   12.09
   0   7   7    7.91   12.02
   0   7  -7   14.58    9.14
   0   7  -7    6.72   12.34
   0  -7   8  301.40   32.88
   0  -7   8  328.10   29.31
   0  -7  -8  273.80   27.50
   0  -7  -8  312.20   29.58
   0   7   8  332.80   30.89
   0   7   8  262.70   29.86
   0   7  -8  277.10   28.41
   0   7  -8  294.50   27.38
   0  -7   9  224.70   30.46
   0  -7   9  155.80   17.93
   0  -7  -9  147.90   18.75
   0  -7  -9  218.70   22.90
   0   7   9  173.10   21.63
   0   7   9  193.60   27.45
   0   7  -9  103.20   20.60
   0   7  -9  135.60   17.77
   0  -7  10  103.10   28.54
   0  -7  10   72.65   14.80
   0  -7 -10   63.00   15.27
   0  -7 -10  103.70   18.16
   0   7  10   83.38   18.27
   0   7  10   78.83   24.46
   0   7 -10   69.67   16.44
   0   7 -10   99.00   21.39
   0  -7  11    6.60   12.91
   0  -7  11    2.14   27.27
   0  -7 -11   32.53   19.95
   0  -7 -11   20.81   18.42
   0   7  11  -10.39   28.16
   0   7  11   52.23   17.08
   0   7 -11   42.36   23.50
   0   7 -11   24.49   13.34
   0  -7  12   77.49   25.06
   0  -7  12   57.13   16.24
   0  -7 -12   82.02   24.00
   0  -7 -12   79.69   19.66
   0   7  12   60.49   31.87
   0   7  12   52.17   25.97
   0   7 -12   82.03   23.89
   0   7 -12   91.06   22.53
   0  -7  13   12.35   24.88
   0  -7  13    0.95   35.19
   0  -7 -13   -5.06   17.10
   0  -7 -13    0.46   22.77
   0   7  13    7.12   24.93
   0   7  13    1.04   22.07
   0   7 -13  -16.77   20.34
   0   7 -13  -14.00   16.60
   0  -7  14   35.99   34.78
   0  -7  14   69.52   26.43
   0  -7 -14   41.04   29.07
   0  -7 -14   39.93   25.56
   0   7  14   84.07   41.06
   0   7  14   46.50   35.59
   0   7 -14   12.58   30.65
   0   7 -14   43.25   31.68
   0  -8   0  868.60   70.31
   0  -8   0  857.80   69.00
   0   8   0  815.30   65.98
   0   8   0  697.30   56.18
   0   8   0  797.00   64.48
   0  -8   1 1694.00  136.00
   0  -8   1 1509.00  121.00
   0  -8  -1 1388.00  111.40
   0  -8  -1 1621.00  130.30
   0   8   1 1621.00  129.90
   0   8   1 1455.00  117.00
   0   8  -1 1634.00  131.20
   0   8  -1 1718.00  137.70
   0  -8   2  177.00   15.17
   0  -8   2  172.50   15.53
   0  -8  -2  175.30   15.79
   0  -8  -2  197.50   17.37
   0   8   2  206.40   18.12
   0   8   2  174.90   15.93
   0   8  -2  166.50   14.27
   0   8  -2  181.20   16.20
   0  -8   3  111.20   10.88
   0  -8   3  113.80   12.55
   0  -8  -3  124.40   11.46
   0  -8  -3  133.70   12.83
   0   8   3  142.10   13.98
   0   8   3  122.50   12.44
   0   8  -3  125.70   11.63
   0   8  -3  112.70   11.89
   0  -8   4 1672.00  134.90
   0  -8   4 2221.00  178.20
   0  -8  -4 2073.00  166.40
   0  -8  -4 2135.00  171.80
   0   8   4 1970.00  158.50
   0   8   4 2265.00  182.10
   0   8  -4 2025.00  162.60
   0   8  -4 1991.00  160.10
   0  -8   5   26.69    7.15
   0  -8   5   23.08   11.66
   0  -8  -5   37.60    8.30
   0  -8  -5   18.05    7.41
   0   8   5   31.91    9.72
   0   8   5   24.69    8.47
   0   8  -5   37.56   10.73
   0   8  -5   32.28    7.33
   0  -8   6   97.11   12.48
   0  -8   6   92.47   15.02
   0  -8  -6   98.72   13.06
   0  -8  -6  141.80   16.17
   0   8   6  161.70   17.53
   0   8   6  158.40   19.23
   0   8  -6  122.40   15.58
   0   8  -6  121.80   14.32
   0  -8   7   40.18   16.65
   0  -8   7   42.09   10.94
   0  -8  -7   68.24   15.09
   0  -8  -7   58.77   12.32
   0   8   7   47.81   15.58
   0   8   7   65.39   14.32
   0   8  -7   48.84   10.14
   0   8  -7   46.25   11.22
   0  -8   8  250.40   29.94
   0  -8  -8  177.90   20.98
   0  -8  -8  210.90   21.96
   0   8   8  168.50   21.37
   0   8   8  225.70   26.03
   0   8  -8  249.30   26.58
   0   8  -8  245.60   24.04
   0  -8   9   57.69   22.09
   0  -8   9  104.00   13.93
   0  -8  -9   71.18   18.09
   0  -8  -9   85.06   16.89
   0   8   9   68.85   17.86
   0   8   9   49.68   22.23
   0   8  -9   39.02   14.68
   0   8  -9   87.99   19.71
   0  -8  10   85.39   13.52
   0  -8  10   84.02   24.49
   0  -8 -10   93.88   18.11
   0  -8 -10   74.67   20.70
   0   8  10   98.14   25.70
   0   8  10   48.44   17.29
   0   8 -10   99.83   18.67
   0   8 -10   93.61   21.40
   0  -8  11   22.73   13.11
   0  -8  11    6.64   23.06
   0  -8 -11   36.72   19.35
   0  -8 -11   32.98   22.59
   0   8  11   39.93   28.42
   0   8  11   19.29   21.87
   0   8 -11   14.68   18.28
   0   8 -11   31.60   23.55
   0  -8  12   72.21   33.49
   0  -8  12   62.89   16.88
   0  -8 -12   44.78   20.39
   0  -8 -12   26.74   19.15
   0   8  12   37.10   26.76
   0   8  12   41.00   31.38
   0   8 -12   39.54   25.39
   0   8 -12   24.59   20.63
   0  -8  13   -9.42   22.70
   0  -8  13   23.26   30.79
   0  -8 -13   -5.39   17.05
   0  -8 -13   16.22   23.80
   0   8  13  -40.83   25.55
   0   8  13   -9.45   21.50
   0   8 -13   22.15   16.96
   0   8 -13    6.68   21.22
   0  -8  14   21.28   45.01
   0  -8  14    5.61   32.02
   0  -8 -14   50.02   24.86
   0  -8 -14   41.78   25.52
   0   8  14   53.00   38.28
   0   8  14   55.81   35.31
   0   8 -14   13.24   25.38
   0   8 -14  -15.03   29.54
   0  -9   0    2.68    3.51
   0  -9   0    0.02    5.28
   0   9   0    2.04    3.37
   0   9   0    0.48    5.16
   0   9   0   -2.56    5.57
   0  -9   1  154.40   14.36
   0  -9   1  158.50   13.55
   0  -9  -1  144.20   12.81
   0  -9  -1  180.60   16.30
   0   9   1  207.70   18.43
   0   9   1  179.70   15.46
   0   9  -1  155.60   13.50
   0   9  -1  173.50   15.73
   0  -9   2   38.05    7.54
   0  -9   2   26.91    4.85
   0  -9  -2   29.48    6.07
   0  -9  -2   42.74    6.57
   0   9   2   19.77    6.74
   0   9  -2   42.57    6.97
   0   9  -2   30.72    4.88
   0  -9   3 1590.00  128.20
   0  -9   3 1655.00  133.00
   0  -9  -3 1628.00  130.90
   0  -9  -3 1380.00  111.10
   0   9   3 1306.00  105.50
   0   9   3 1477.00  119.10
   0   9  -3 1424.00  114.50
   0   9  -3 1547.00  124.60
   0  -9   4   52.66    7.02
   0  -9   4   43.85   10.19
   0  -9  -4   52.47    8.49
   0  -9  -4   59.14    8.56
   0   9   4   38.85    9.11
   0   9   4   69.00    9.61
   0   9  -4   55.45   10.34
   0   9  -4   58.62    8.43
   0  -9   5  605.30   51.08
   0  -9   5  580.70   47.67
   0  -9  -5  533.90   45.17
   0  -9  -5  573.30   47.25
   0   9   5  475.50   40.47
   0   9   5  572.00   47.79
   0   9  -5  606.40   49.86
   0   9  -5  438.20   37.71
   0  -9   6    2.57    8.95
   0  -9   6   -4.83   13.55
   0  -9  -6   -0.16    8.03
   0  -9  -6   10.32    8.58
   0   9   6   -6.79    9.79
   0   9   6   10.64    9.14
   0   9  -6   -3.86    8.44
   0   9  -6    4.35    7.24
   0  -9   7   22.83   17.00
   0  -9   7   46.24    9.74
   0  -9  -7   37.90   13.00
   0  -9  -7   33.91    8.69
   0   9   7   42.95   13.38
   0   9   7   39.52   12.54
   0   9  -7   56.27   10.91
   0   9  -7   36.71   14.04
   0  -9   8   -7.32   19.84
   0  -9  -8    2.76   10.65
   0  -9  -8    1.25   15.17
   0   9   8    9.36   14.24
   0   9   8   14.05   14.87
   0   9  -8    3.08   10.67
   0  -9   9   65.26   15.38
   0  -9   9  111.80   25.26
   0  -9  -9   97.63   18.02
   0  -9  -9  101.30   16.56
   0   9   9   99.92   22.79
   0   9   9  100.80   19.68
   0   9  -9   85.82   15.45
   0   9  -9   66.79   14.79
   0  -9  10   36.33   26.49
   0  -9  10   66.57   12.74
   0  -9 -10   56.12   20.26
   0  -9 -10   41.30   16.75
   0   9  10   52.61   24.51
   0   9  10  105.50   22.50
   0   9 -10   64.04   20.67
   0   9 -10   88.41   16.97
   0  -9  11   13.00   12.22
   0  -9  11   45.84   31.22
   0  -9 -11    6.64   22.06
   0  -9 -11   22.87   18.29
   0   9  11    5.11   23.31
   0   9  11   19.27   26.98
   0   9 -11   -3.83   17.15
   0   9 -11   16.57   23.34
   0  -9  12   52.48   33.51
   0  -9  12   66.20   16.74
   0  -9 -12   33.74   20.63
   0  -9 -12   21.23   18.34
   0   9  12   35.43   30.01
   0   9  12   45.85   27.20
   0   9 -12   38.07   15.69
   0   9 -12    4.41   26.39
   0  -9  13   96.82   27.52
   0  -9  13   93.52   20.94
   0  -9 -13  108.60   26.29
   0  -9 -13   86.77   19.77
   0   9  13   73.16   26.59
   0   9  13   65.31   24.18
   0   9 -13   72.93   22.92
   0   9 -13   59.50   27.59
   0  -9  14   10.53   44.07
   0  -9  14   31.25   29.27
   0  -9 -14   11.01   21.40
   0  -9 -14   15.69   26.15
   0   9  14   30.45   35.86
   0   9  14   28.92   31.45
   0   9 -14   -4.98   24.75
   0   9 -14   -8.15   26.14
   0 -10   0 4651.00  371.90
   0 -10   0 4375.00  350.30
   0  10   0 5391.00  431.30
   0  10   0 4437.00  355.20
   0  10   0 4836.00  386.70
   0 -10   1   20.18    6.70
   0 -10   1   13.78    3.93
   0 -10  -1    5.42    4.50
   0 -10  -1    3.99    5.37
   0  10   1   14.21    4.90
   0  10   1   20.50    7.82
   0  10  -1   14.43    4.33
   0  10  -1   15.40    6.07
   0 -10   2  800.60   65.37
   0 -10   2  896.00   72.32
   0 -10  -2  870.70   70.44
   0 -10  -2  897.20   72.74
   0  10   2  710.30   57.74
   0  10   2  879.90   71.75
   0  10  -2  819.00   66.49
   0  10  -2  894.70   72.11
   0 -10   3 3935.00  315.40
   0 -10   3 4888.00  391.10
   0 -10  -3 4402.00  352.40
   0 -10  -3 4725.00  378.20
   0  10   3 4008.00  321.10
   0  10   3 4206.00  336.90
   0  10  -3 3737.00  299.40
   0  10  -3 3861.00  309.10
   0 -10   4  108.80   11.73
   0 -10   4  111.70   13.68
   0 -10  -4  114.20   12.21
   0 -10  -4  112.80   13.88
   0  10   4  108.70   12.90
   0  10   4   97.39   12.26
   0  10  -4   95.93   12.32
   0  10  -4   92.27   10.42
   0 -10   5   49.14   11.84
   0 -10   5   64.13    8.23
   0 -10  -5   76.47    9.29
   0 -10  -5   93.56   14.09
   0  10   5   59.52   11.90
   0  10   5   91.58   13.60
   0  10  -5   54.42   11.94
   0  10  -5   77.39   10.47
   0 -10   6  129.30   14.01
   0 -10   6  149.70   18.18
   0 -10  -6  145.80   15.02
   0 -10  -6  129.60   15.85
   0  10   6  159.70   17.06
   0  10   6  164.20   19.73
   0  10  -6  154.10   16.14
   0 -10   7  383.10   36.47
   0 -10   7  359.90   31.90
   0 -10  -7  395.70   34.99
   0 -10  -7  371.50   33.53
   0  10   7  412.00   37.59
   0  10   7  413.40   36.18
   0  10  -7  367.30   32.52
   0  10  -7  367.70   32.33
   0 -10   8   59.05   15.62
   0 -10   8   44.18   21.38
   0 -10  -8   35.34   13.65
   0 -10  -8   44.06   12.07
   0  10   8   62.45   13.53
   0  10   8   45.45   18.51
   0  10  -8   51.46   13.54
   0 -10   9    2.58   23.48
   0 -10   9    3.79   14.24
   0 -10  -9   14.82   17.43
   0 -10  -9    6.58   10.71
   0  10   9    0.76   15.72
   0  10   9  -13.40   15.62
   0  10  -9    2.85   17.44
   0  10  -9    9.20   14.35
   0 -10  10  -21.88   18.97
   0 -10  10   -8.54   11.68
   0 -10 -10  -12.18   15.89
   0 -10 -10    6.02   14.63
   0  10  10  -26.44   18.07
   0  10  10   19.89   23.14
   0  10 -10   -3.48   16.29
   0  10 -10   19.52   18.98
   0 -10  11  342.70   40.75
   0 -10  11  362.30   33.02
   0 -10 -11  329.10   33.62
   0 -10 -11  333.00   34.04
   0  10  11  352.70   40.89
   0  10  11  329.50   37.76
   0  10 -11  321.30   36.73
   0  10 -11  375.70   34.89
   0 -10  12   77.24   16.86
   0 -10  12   43.01   25.30
   0 -10 -12   21.19   17.64
   0 -10 -12   72.45   23.25
   0  10  12   39.86   22.33
   0  10  12   28.29   32.03
   0  10 -12   65.64   19.85
   0  10 -12   44.76   27.01
   0 -10  13   19.60   18.47
   0 -10  13   -3.08   27.20
   0 -10 -13   46.11   21.88
   0 -10 -13   12.86   25.07
   0  10  13   54.41   23.47
   0  10  13   52.03   35.54
   0  10 -13   35.70   24.50
   0  10 -13   42.97   30.08
   0 -10  14  -35.61   44.33
   0 -10  14   -0.18   22.81
   0 -10 -14   11.35   28.91
   0 -10 -14   -2.68   22.01
   0  10  14  -10.08   35.13
   0  10  14    0.63   29.53
   0  10 -14    7.04   22.70
   0  10 -14  -13.77   32.21
   0 -11   0    2.10    4.18
   0 -11   0    5.98    7.08
   0  11   0   -3.99    6.31
   0  11   0    4.55    6.77
   0  11   0    2.37    4.23
   0 -11   1 1226.00   99.10
   0 -11   1 1412.00  113.50
   0 -11  -1 1489.00  120.00
   0 -11  -1 1505.00  120.80
   0  11   1 1395.00  112.20
   0  11   1 1252.00  101.30
   0  11  -1 1595.00  128.00
   0  11  -1 1290.00  104.20
   0 -11   2   74.51    8.03
   0 -11   2   76.27   10.24
   0 -11  -2   81.35    8.81
   0 -11  -2   75.88    9.40
   0  11   2   79.59   10.87
   0  11   2   68.76    8.37
   0  11  -2   86.05   10.24
   0  11  -2   60.58    6.99
   0 -11   3  123.40   11.84
   0 -11   3  119.10   13.70
   0 -11  -3  103.10   11.73
   0 -11  -3  119.10   12.44
   0  11   3  126.80   13.32
   0  11   3  101.50   12.00
   0  11  -3   96.48   11.25
   0  11  -3  112.10   10.93
   0 -11   4  345.10   30.58
   0 -11   4  402.20   33.66
   0 -11  -4  369.30   31.70
   0 -11  -4  444.70   37.13
   0  11   4  342.30   29.43
   0  11   4  338.70   29.74
   0  11  -4  386.30   32.41
   0  11  -4  305.70   26.78
   0 -11   5   89.18   14.37
   0 -11   5  115.90   11.69
   0 -11  -5  122.10   13.66
   0 -11  -5  123.80   15.04
   0  11   5   79.71   12.43
   0  11   5  129.40   16.95
   0  11  -5  123.30   15.41
   0  11  -5  125.70   13.55
   0 -11   6 1001.00   82.82
   0 -11   6 1150.00   93.17
   0 -11  -6  997.70   81.91
   0 -11  -6 1167.00   94.84
   0  11   6  977.40   80.47
   0  11   6  994.70   82.05
   0  11  -6 1137.00   92.47
   0  11  -6 1020.00   84.02
   0 -11   7    0.83    7.60
   0 -11   7   -0.34   16.57
   0 -11  -7    9.08   10.15
   0 -11  -7    0.50   12.88
   0  11   7    4.82   16.44
   0  11   7   -4.19   12.31
   0  11  -7  -20.26   14.32
   0  11  -7    6.41   10.13
   0 -11   8   71.47   21.68
   0 -11   8   64.39   14.76
   0 -11  -8   66.02   14.00
   0 -11  -8   76.53   18.45
   0  11   8   83.13   18.13
   0  11   8   61.59   21.88
   0  11  -8  100.90   17.11
   0  11  -8   52.34   14.00
   0 -11   9   98.36   25.86
   0 -11   9   55.43   14.75
   0 -11  -9   94.86   19.98
   0 -11  -9   75.84   14.94
   0  11   9   34.32   19.96
   0  11   9   72.66   19.13
   0  11  -9   46.91   15.48
   0  11  -9   61.46   21.10
   0 -11  10   94.96   28.47
   0 -11  10  105.20   16.37
   0 -11 -10  142.20   19.99
   0 -11 -10   85.61   20.86
   0  11  10  117.00   26.09
   0  11  10  103.30   19.78
   0  11 -10  126.00   19.51
   0  11 -10  104.50   20.36
   0 -11  11   30.23   32.85
   0 -11  11   10.36   12.63
   0 -11 -11   -5.61   16.49
   0 -11 -11  -18.30   18.98
   0  11  11    3.56   28.30
   0  11  11    1.59   18.69
   0  11 -11   23.40   24.26
   0  11 -11   14.59   17.53
   0 -11  12  232.30   35.98
   0 -11  12  252.00   27.17
   0 -11 -12  225.80   31.38
   0 -11 -12  267.00   29.23
   0  11  12  229.80   39.43
   0  11  12  251.10   31.79
   0  11 -12  252.90   30.63
   0  11 -12  194.60   31.66
   0 -11  13  -66.92   37.25
   0 -11  13   -0.99   20.49
   0 -11 -13   -2.62   26.42
   0 -11 -13  -35.13   25.39
   0  11  13  -15.36   33.89
   0  11  13   44.70   24.66
   0  11 -13  -15.76   28.06
   0  11 -13   14.89   21.22
   0 -11  14  -27.19   41.75
   0 -11  14  -17.34   23.92
   0 -11 -14   25.92   26.93
   0 -11 -14   32.68   31.42
   0  11  14   15.14   34.64
   0  11  14   20.43   34.81
   0  11 -14   68.12   34.11
   0  11 -14   12.72   23.17
   0  12   0 3603.00  288.70
   0  12   0 3793.00  303.90
   0  12   0 3917.00  313.40
   0 -12   1   49.95    6.55
   0 -12   1   68.05   10.51
   0 -12  -1   70.33    9.53
   0 -12  -1   43.84    6.64
   0  12   1   71.66   10.70
   0  12   1   72.48    8.53
   0  12  -1   72.29    7.98
   0  12  -1   94.70   11.48
   0 -12   2   14.85    4.87
   0 -12   2   27.98    9.07
   0 -12  -2   13.13    6.72
   0 -12  -2   23.73    7.11
   0  12   2   23.54    8.21
   0  12   2   36.61    8.06
   0  12  -2   26.24    5.45
   0  12  -2   20.88    7.13
   0 -12   3   60.43    7.64
   0 -12   3   46.90   10.38
   0 -12  -3   73.71   10.16
   0 -12  -3   45.36    8.80
   0  12   3   58.66    9.19
   0  12   3   48.48    9.95
   0  12  -3   49.48    9.12
   0  12  -3   52.44    7.21
   0 -12   4  439.70   37.99
   0 -12  -4  416.40   36.20
   0 -12  -4  331.20   27.98
   0  12   4  369.40   32.31
   0  12   4  400.80   34.63
   0  12  -4  377.00   32.66
   0  12  -4  371.90   31.36
   0 -12   5  431.80   35.93
   0 -12   5  303.90   28.72
   0 -12  -5  422.70   35.89
   0 -12  -5  338.30   29.83
   0  12   5  374.10   32.79
   0  12   5  321.30   28.52
   0  12  -5  392.40   33.38
   0  12  -5  355.70   31.87
   0 -12   6  521.60   46.04
   0 -12   6  479.40   40.48
   0 -12  -6  422.90   36.03
   0 -12  -6  473.10   40.96
   0  12   6  428.00   37.65
   0  12   6  428.00   38.53
   0  12  -6  382.40   32.96
   0  12  -6  474.00   40.83
   0 -12   7  335.90   33.64
   0 -12   7  254.20   24.42
   0 -12  -7  278.90   25.45
   0 -12  -7  290.40   29.01
   0  12   7  277.00   27.34
   0  12   7  298.30   29.53
   0  12  -7  275.50   25.68
   0  12  -7  291.20   27.02
   0 -12   8   59.82   12.48
   0 -12   8   62.81   21.30
   0 -12  -8   95.47   12.93
   0 -12  -8  108.40   17.43
   0  12   8   80.99   15.34
   0  12   8   67.55   19.06
   0  12  -8   56.55   14.12
   0  12  -8   89.36   19.97
   0 -12   9   69.02   12.48
   0 -12   9  128.60   26.95
   0 -12  -9   72.88   15.01
   0 -12  -9   62.24   18.30
   0  12   9   86.06   18.10
   0  12   9   50.16   20.75
   0  12  -9   54.67   24.21
   0  12  -9   87.77   16.62
   0 -12  10  406.40   37.34
   0 -12 -10  442.20   39.86
   0 -12 -10  389.70   39.31
   0  12  10  518.60   49.00
   0  12  10  463.70   46.04
   0  12 -10  393.30   37.10
   0  12 -10  376.80   35.47
   0 -12  11   86.67   34.44
   0 -12 -11  157.10   25.77
   0 -12 -11  122.30   22.38
   0  12  11   78.52   21.70
   0  12  11   82.44   30.20
   0  12 -11   61.73   13.95
   0  12 -11  100.70   26.08
   0 -12  12   32.68   19.96
   0 -12  12  -33.10   34.93
   0 -12 -12    0.86   22.55
   0 -12 -12    7.94   20.90
   0  12  12   -9.02   32.92
   0  12  12   -0.30   22.30
   0  12 -12   -6.49   22.03
   0  12 -12   -0.29   15.08
   0 -12  13    0.42   28.17
   0 -12  13   60.80   39.27
   0 -12 -13    7.17   25.93
   0 -12 -13   18.16   26.05
   0  12  13  -20.00   25.53
   0  12  13   37.65   35.77
   0  12 -13  -19.25   17.87
   0  12 -13    7.32   21.31
   0 -12  14   43.16   33.06
   0 -12  14  124.50   36.78
   0 -12 -14   46.81   32.68
   0 -12 -14   65.09   32.93
   0  12  14  -10.46   36.07
   0  12  14   53.11   42.70
   0  12 -14  120.20   29.51
   0  12 -14   98.26   26.79
   0 -13   0    6.80    8.18
   0 -13   0    1.18    4.92
   0  13   0   -5.78    4.93
   0  13   0    2.66    6.89
   0  13   0    4.04    7.73
   0 -13   1 4478.00  358.70
   0 -13   1 3527.00  282.40
   0 -13  -1 3662.00  293.20
   0 -13  -1 3902.00  312.60
   0  13   1 2812.00  225.30
   0  13  -1 3489.00  279.30
   0  13  -1 3650.00  292.50
   0 -13   2  322.40   28.14
   0 -13   2  344.90   28.89
   0 -13  -2  345.10   29.77
   0 -13  -2  360.60   30.24
   0  13   2  358.30   31.18
   0  13   2  341.30   28.76
   0  13  -2  319.60   27.42
   0  13  -2  379.00   31.58
   0 -13   3  642.80   53.67
   0 -13   3  681.30   55.51
   0 -13  -3  675.30   55.30
   0 -13  -3  563.10   46.55
   0  13   3  527.00   43.83
   0  13   3  560.70   46.84
   0  13  -3  593.70   48.57
   0  13  -3  555.10   46.15
   0 -13   4  -11.43   10.02
   0 -13   4    6.48    6.69
   0 -13  -4   11.22    8.91
   0 -13  -4    5.12    8.17
   0  13   4   -2.70    8.46
   0  13   4    6.35    9.87
   0  13  -4   -0.02    8.49
   0  13  -4   -3.67    6.48
   0 -13   5  816.20   66.69
   0 -13   5  726.60   60.65
   0 -13  -5  768.50   62.90
   0 -13  -5  667.60   55.45
   0  13   5  632.00   53.06
   0  13   5  775.80   64.82
   0  13  -5  751.50   62.02
   0  13  -5  727.50   59.84
   0 -13   6  406.70   34.71
   0 -13   6  493.80   43.50
   0 -13  -6  348.30   31.63
   0 -13  -6  419.10   35.63
   0  13   6  321.10   29.16
   0  13   6  427.60   38.04
   0  13  -6  425.70   37.81
   0  13  -6  341.90   30.09
   0 -13   7   12.25    7.93
   0 -13   7   24.60   15.65
   0 -13  -7   25.55   13.53
   0 -13  -7   23.02   14.52
   0  13   7   33.72   17.19
   0  13   7   19.37   15.78
   0  13  -7   18.50   15.01
   0  13  -7   -4.99   10.76
   0 -13   8    6.79   12.50
   0 -13   8   -9.79   17.72
   0 -13  -8  -12.05   16.38
   0 -13  -8   29.18   12.22
   0  13   8  -12.46   14.63
   0  13   8    7.58   17.39
   0  13  -8    7.39   17.87
   0  13  -8   10.55   12.48
   0 -13   9  461.90   47.91
   0 -13   9  449.60   39.60
   0 -13  -9  487.40   43.06
   0 -13  -9  438.00   41.60
   0  13   9  491.00   46.28
   0  13   9  494.50   47.02
   0  13  -9  473.60   41.40
   0  13  -9  517.30   47.76
   0 -13  10    1.08   28.38
   0 -13  10    2.24   15.80
   0 -13 -10   -5.17   14.81
   0 -13 -10  -11.71   16.68
   0  13  10  -15.28   22.13
   0  13  10    9.12   23.49
   0  13 -10   -7.77   15.02
   0  13 -10    6.02   13.08
   0 -13  11   48.64   14.31
   0 -13  11   62.34   25.47
   0 -13 -11   20.94   25.43
   0 -13 -11   72.33   20.86
   0  13  11    0.55   29.73
   0  13  11   46.08   27.99
   0  13 -11   24.39   17.35
   0  13 -11   27.56   24.22
   0 -13  12    5.72   20.14
   0 -13  12   16.69   27.67
   0 -13 -12   15.49   20.99
   0 -13 -12  -20.65   24.06
   0  13  12   -1.83   29.06
   0  13  12   -1.78   25.45
   0  13 -12  -16.89   19.98
   0  13 -12  -17.75   18.90
   0 -13  13  126.80   32.26
   0 -13  13  165.30   30.46
   0 -13 -13  119.20   23.29
   0 -13 -13  139.00   30.08
   0  13  13   75.84   29.30
   0  13  13   81.68   32.60
   0  13 -13  100.10   21.96
   0  13 -13  109.00   24.91
   0 -13  14    1.30   32.17
   0 -13  14   21.36   32.82
   0 -13 -14  -12.50   27.63
   0 -13 -14   39.47   34.09
   0  13  14   33.60   34.69
   0  13  14    5.60   38.53
   0  13 -14   48.72   32.80
   0  13 -14  -10.91   27.50
   0  14   0 2644.00  211.90
   0  14   0 2162.00  173.90
   0 -14   1 1007.00   81.41
   0 -14   1 1115.00   90.67
   0 -14  -1 1030.00   83.27
   0 -14  -1 1192.00   96.61
   0  14   1  952.10   76.96
   0  14   1 1221.00   99.13
   0  14  -1 1015.00   82.55
   0  14  -1 1229.00   99.07
   0 -14   2   24.75    9.23
   0 -14   2   37.11    6.24
   0 -14  -2   29.08    9.37
   0 -14  -2   28.71    7.82
   0  14   2   50.36   10.65
   0  14   2   29.20    6.52
   0  14  -2   40.95    7.09
   0  14  -2   18.89    8.05
   0 -14   3 2680.00  215.60
   0 -14   3 2871.00  230.10
   0 -14  -3 2490.00  200.10
   0 -14  -3 2575.00  206.70
   0  14   3 2006.00  161.60
   0  14   3 2419.00  194.70
   0  14  -3 2695.00  216.40
   0  14  -3 2714.00  217.60
   0 -14   4  211.70   21.72
   0 -14   4  295.20   25.43
   0 -14  -4  248.40   22.38
   0  14   4  237.20   23.28
   0  14   4  290.20   26.18
   0  14  -4  259.20   22.64
   0  14  -4  249.60   22.84
   0 -14   5  321.50   28.13
   0 -14   5  354.50   33.90
   0 -14  -5  316.40   28.18
   0  14   5  340.70   30.19
   0  14   5  316.10   29.49
   0  14  -5  323.40   28.14
   0  14  -5  311.90   28.64
   0 -14   6  160.60   16.41
   0 -14   6  145.20   20.30
   0 -14  -6  149.20   17.11
   0 -14  -6  171.20   19.70
   0  14   6  110.90   17.03
   0  14   6  186.70   21.86
   0  14  -6  136.10   15.29
   0  14  -6  153.30   18.43
   0 -14   7  571.00   51.20
   0 -14   7  427.90   37.00
   0 -14  -7  451.20   39.59
   0 -14  -7  488.80   42.30
   0  14   7  514.00   45.37
   0  14   7  530.80   47.70
   0  14  -7  502.60   44.38
   0  14  -7  472.80   40.93
   0 -14   8   42.53   14.64
   0 -14   8   47.26   22.03
   0 -14  -8   60.10   17.25
   0 -14  -8   92.59   15.20
   0  14   8   55.39   18.06
   0  14   8   48.90   16.01
   0  14  -8   38.59   13.94
   0  14  -8   54.59   13.73
   0 -14   9   53.93   27.99
   0 -14   9   71.58   14.58
   0 -14  -9   70.66   15.32
   0 -14  -9   39.23   15.01
   0  14   9   36.20   22.45
   0  14   9   69.53   18.00
   0  14  -9   72.15   16.11
   0  14  -9   42.11   19.69
   0 -14  10   81.13   27.87
   0 -14  10  125.90   19.96
   0 -14 -10   81.61   17.96
   0 -14 -10  111.10   20.86
   0  14  10   35.57   25.86
   0  14  10  113.90   20.08
   0  14 -10  124.00   19.93
   0  14 -10  102.20   18.78
   0 -14  11   65.92   34.78
   0 -14  11   87.25   18.61
   0 -14 -11   70.21   20.00
   0 -14 -11   83.44   25.18
   0  14  11   79.04   27.83
   0  14  11  130.50   29.36
   0  14 -11  121.90   26.53
   0  14 -11  116.50   16.76
   0 -14  12   33.85   30.27
   0 -14  12    3.99   19.81
   0 -14 -12   40.20   17.20
   0 -14 -12   -4.52   27.20
   0  14  12   16.67   24.61
   0  14  12    3.93   29.51
   0  14 -12   20.08   21.45
   0  14 -12   18.10   21.33
   0 -14  13   39.26   20.76
   0 -14  13   85.17   30.50
   0 -14 -13    3.64   29.58
   0 -14 -13   57.63   20.28
   0  14  13   63.49   29.48
   0  14  13   50.12   30.05
   0  14 -13   99.81   31.36
   0  14 -13   56.13   26.60
   0 -14  14   -7.12   34.85
   0 -14  14   13.04   24.58
   0  14  14   28.91   31.79
   0  14 -14   67.99   34.51
   0 -15   0    5.12    6.59
   0 -15   0    8.72    9.55
   0  15   0   -1.90    9.10
   0  15   0    3.17    5.84
   0 -15   1  523.40   44.15
   0 -15   1  531.60   44.65
   0 -15   1  540.40   44.40
   0 -15  -1  457.70   37.83
   0 -15  -1  443.30   37.64
   0  15   1  411.50   35.48
   0  15   1  489.40   40.38
   0  15  -1  457.20   37.74
   0  15  -1  539.80   45.02
   0 -15   2 1068.00   86.22
   0 -15   2 1041.00   85.15
   0 -15  -2  939.90   76.77
   0 -15  -2  904.60   73.51
   0  15   2 1191.00   96.90
   0  15  -2  989.00   80.66
   0  15  -2 1216.00   98.19
   0 -15   3  219.50   19.57
   0 -15   3  237.80   23.21
   0 -15  -3  275.40   24.06
   0 -15  -3  234.10   21.70
   0  15   3  231.80   21.89
   0  15   3  262.90   24.85
   0  15  -3  229.30   20.47
   0  15  -3  221.70   20.86
   0 -15   4 1759.00  141.60
   0 -15   4 1545.00  125.50
   0 -15  -4 1427.00  115.40
   0 -15  -4 1727.00  139.40
   0  15   4 1876.00  151.60
   0  15  -4 1474.00  118.90
   0  15  -4 1393.00  112.90
   0 -15   5    1.88    6.57
   0 -15   5   -8.10   12.34
   0 -15  -5   16.97    9.49
   0 -15  -5   14.75    9.24
   0  15   5   27.19   13.68
   0  15   5   23.29   12.25
   0  15  -5    0.70   11.18
   0  15  -5   -8.74    8.29
   0 -15   6  751.40   64.04
   0 -15   6  819.20   67.26
   0 -15  -6  791.50   66.12
   0 -15  -6  975.40   79.85
   0  15   6  808.50   67.92
   0  15   6  934.00   77.93
   0  15  -6  821.80   67.50
   0  15  -6  744.70   62.35
   0 -15   7   29.32   18.00
   0 -15   7    8.43   11.23
   0 -15  -7   10.24   11.67
   0  15   7    5.44   16.69
   0  15  -7   11.81   10.83
   0  15  -7   26.27   11.30
   0 -15   8  171.30   30.22
   0 -15   8  128.50   17.91
   0 -15  -8  193.30   21.61
   0 -15  -8  143.00   20.56
   0  15   8  153.60   20.72
   0  15   8  120.90   20.15
   0  15  -8  124.60   16.16
   0  15  -8  129.80   18.35
   0 -15   9   52.57   16.51
   0 -15   9   96.50   27.37
   0 -15  -9   95.80   20.87
   0 -15  -9  103.00   17.51
   0  15   9   85.13   22.94
   0  15   9   87.87   22.13
   0  15  -9  103.10   21.60
   0  15  -9   90.37   17.12
   0 -15  10  208.80   35.11
   0 -15  10  155.00   22.34
   0 -15 -10  171.30   22.84
   0  15  10  162.50   31.19
   0  15  10  126.50   26.13
   0  15 -10  193.50   23.47
   0  15 -10  131.80   20.01
   0 -15  11    4.79   18.96
   0 -15  11   -7.06   24.32
   0 -15 -11  -15.94   15.83
   0 -15 -11   14.45   20.15
   0  15  11    1.60   22.51
   0  15  11   -7.27   20.70
   0  15 -11   -0.27   20.36
   0  15 -11   13.43   18.67
   0 -15  12   61.01   40.25
   0 -15  12   89.68   18.84
   0 -15 -12   88.23   28.30
   0 -15 -12   75.58   18.68
   0  15  12   77.57   25.93
   0  15  12   99.86   32.11
   0  15 -12   87.88   28.06
   0  15 -12   94.85   18.29
   0 -15  13   -6.73   40.88
   0 -15  13   14.86   20.07
   0 -15 -13   53.63   30.47
   0 -15 -13   31.13   19.95
   0  15  13    1.96   35.87
   0  15  13   50.95   31.56
   0  15 -13   22.23   22.48
   0  15 -13  -19.54   32.23
   0 -16   0 1192.00   96.93
   0 -16   0 1434.00  115.50
   0  16   0 1044.00   84.26
   0  16   0 1291.00  104.70
   0 -16   1  791.40   65.18
   0 -16   1  631.10   51.58
   0 -16   1  655.00   54.61
   0 -16  -1  673.80   55.96
   0 -16  -1  580.30   47.73
   0  16   1  637.90   53.17
   0  16  -1  702.60   57.96
   0  16  -1  572.30   46.91
   0 -16   2   57.39   11.72
   0 -16   2   53.84    7.76
   0 -16  -2   59.79   11.64
   0 -16  -2   37.10    8.58
   0  16   2   71.78   12.00
   0  16   2   67.09    9.27
   0  16  -2   44.79    9.99
   0  16  -2   52.13    8.31
   0 -16   3  214.40   19.02
   0 -16   3  165.70   18.53
   0 -16  -3  174.60   17.25
   0 -16  -3  238.10   22.00
   0  16   3  168.40   18.36
   0  16   3  223.80   21.26
   0  16  -3  148.90   14.66
   0  16  -3  202.00   19.88
   0 -16   4 1239.00  100.20
   0 -16   4 1177.00   96.37
   0 -16  -4  973.80   79.51
   0 -16  -4 1182.00   96.13
   0  16   4 1107.00   90.36
   0  16   4 1156.00   94.70
   0  16  -4 1037.00   84.67
   0  16  -4 1150.00   93.17
   0 -16   5   66.43   10.84
   0 -16   5   84.61   15.92
   0 -16  -5   73.10   13.66
   0 -16  -5   52.44   10.59
   0  16   5   68.87   15.27
   0  16   5   55.06   14.01
   0  16  -5   58.59   10.79
   0  16  -5   88.64   14.16
   0 -16   6  290.70   30.57
   0 -16   6  350.40   30.87
   0 -16  -6  319.20   28.01
   0 -16  -6  350.10   31.48
   0  16   6  312.20   30.90
   0  16   6  278.90   28.22
   0  16  -6  295.70   27.85
   0  16  -6  370.70   32.37
   0 -16   7   68.97   11.95
   0 -16   7   90.40   20.68
   0 -16  -7   79.60   17.75
   0 -16  -7   65.58   12.75
   0  16   7   63.01   18.87
   0  16   7   77.34   18.44
   0  16  -7   64.25   15.21
   0  16  -7   85.94   14.23
   0 -16   8  680.20   62.87
   0 -16  -8  652.10   56.41
   0 -16  -8  664.50   56.27
   0  16   8  576.70   51.39
   0  16   8  579.20   50.60
   0  16  -8  587.60   50.14
   0  16  -8  600.10   52.85
   0 -16   9    2.11   27.78
   0 -16   9   69.24   17.35
   0 -16  -9   47.86   15.39
   0 -16  -9   13.77   18.57
   0  16   9   28.72   19.01
   0  16   9    1.45   15.86
   0  16  -9   15.90   12.54
   0  16  -9    9.65   18.66
   0 -16  10  170.50   33.50
   0 -16  10  159.30   21.72
   0 -16 -10  211.40   25.07
   0 -16 -10  164.60   25.74
   0  16  10  154.90   26.69
   0  16  10  202.60   31.73
   0  16 -10  130.20   20.22
   0 -16  11  138.70   23.25
   0 -16  11   87.08   34.80
   0 -16 -11  155.90   19.89
   0 -16 -11  116.30   21.25
   0  16  11  189.50   25.97
   0  16  11  181.90   26.88
   0  16 -11  139.20   22.57
   0  16 -11  163.80   21.74
   0 -16  12   55.13   16.54
   0 -16  12   27.18   33.10
   0 -16 -12    9.38   27.48
   0 -16 -12   45.00   22.51
   0  16  12   10.06   32.94
   0  16  12   31.83   30.50
   0  16 -12   42.37   31.71
   0  16 -12   23.83   21.30
   0 -16  13  -15.22   43.42
   0 -16  13   -2.72   27.59
   0 -16 -13   32.63   33.35
   0 -16 -13    7.10   27.94
   0  16  13   -4.04   36.66
   0  16  13   13.00   34.86
   0  16 -13  -28.45   24.69
   0  16 -13    0.71   19.41
   0 -17   0   -2.11   10.58
   0 -17   0   -5.86    6.67
   0  17   0    9.48    6.35
   0  17   0    5.17    9.85
   0 -17   1 1211.00   97.94
   0 -17   1 1208.00   98.47
   0 -17   1 1557.00  126.10
   0 -17  -1 1261.00  102.60
   0 -17  -1 1384.00  111.60
   0  17   1 1338.00  107.90
   0  17   1 1402.00  113.80
   0  17  -1 1377.00  111.00
   0  17  -1 1228.00   99.72
   0 -17   2    5.04   10.51
   0 -17   2   11.70    6.37
   0 -17  -2    2.79    7.56
   0 -17  -2    3.88    9.96
   0  17   2   11.38    7.69
   0  17   2   31.81   12.66
   0  17  -2    5.50    9.62
   0  17  -2    8.54    6.67
   0 -17   3  952.60   77.32
   0 -17   3 1025.00   84.21
   0 -17  -3 1096.00   89.04
   0 -17  -3  902.10   73.88
   0  17   3  930.40   76.08
   0  17   3  825.20   68.29
   0  17  -3  747.80   61.70
   0  17  -3  950.80   77.29
   0 -17   4    5.41    7.48
   0 -17   4   15.16   12.06
   0 -17  -4    5.55    9.88
   0 -17  -4   -2.61    9.13
   0  17   4   -2.12   13.61
   0  17   4   22.58   11.43
   0  17  -4   -4.64   10.37
   0  17  -4   -5.30    7.14
   0 -17   5  935.80   76.27
   0 -17   5  805.40   68.06
   0 -17  -5  737.70   60.77
   0 -17  -5  762.40   63.05
   0  17   5  771.10   64.62
   0  17   5  743.60   62.46
   0  17  -5  956.00   78.63
   0  17  -5  824.10   67.55
   0 -17   6   21.97    7.78
   0 -17   6   32.62   16.93
   0 -17  -6    5.59   12.37
   0 -17  -6   10.05    8.25
   0  17   6   31.09   13.24
   0  17   6   40.90   14.89
   0  17  -6   28.01   14.18
   0  17  -6   20.74    9.87
   0 -17   7   60.78   18.08
   0 -17   7   72.42   10.91
   0 -17  -7   80.96   16.61
   0 -17  -7   93.75   13.96
   0  17   7  104.40   18.28
   0  17   7   71.64   17.97
   0  17  -7   75.14   17.46
   0  17  -7   67.35   13.45
   0 -17   8   56.49   11.37
   0 -17   8   30.87   26.38
   0 -17  -8   13.08   17.52
   0 -17  -8    5.47   13.39
   0  17   8   67.88   20.14
   0  17   8   24.77   17.89
   0  17  -8   42.61   14.58
   0  17  -8   42.02   19.26
   0 -17   9  548.50   48.22
   0 -17   9  723.70   67.77
   0 -17  -9  588.90   50.64
   0 -17  -9  540.20   48.34
   0  17   9  505.70   45.57
   0  17   9  451.30   43.61
   0  17  -9  560.90   48.97
   0  17  -9  548.80   50.15
   0 -17  10    8.91   29.14
   0 -17  10   -3.53   13.64
   0 -17 -10   -7.06   16.83
   0 -17 -10   -8.41   15.65
   0  17  10  -24.64   24.39
   0  17  10   23.13   18.56
   0  17 -10   -2.64   15.90
   0  17 -10   -2.14   21.83
   0 -17  11   48.68   32.11
   0 -17  11   66.46   19.55
   0 -17 -11   68.89   23.09
   0 -17 -11   66.69   17.03
   0  17  11   68.99   25.60
   0  17  11  106.90   29.18
   0  17 -11   41.35   20.66
   0  17 -11   30.01   22.08
   0 -17  12    1.61   32.35
   0 -17  12    8.35   19.99
   0 -17 -12  -19.87   24.05
   0 -17 -12   -0.21   25.36
   0  17  12  -23.73   37.21
   0  17  12  -35.06   27.76
   0  17 -12    0.33   26.17
   0  17 -12  -19.51   21.90
   0 -17  13  102.70   37.18
   0 -17  13   98.29   26.22
   0 -17 -13  137.60   27.24
   0 -17 -13  121.00   37.04
   0  17  13   88.39   28.79
   0  17  13   35.71   37.16
   0  17 -13   75.14   28.09
   0  17 -13  103.90   28.80
   0 -18   0  279.00   26.22
   0 -18   0  279.20   24.55
   0  18   0  291.40   25.24
   0  18   0  218.90   22.10
   0 -18   1  612.70   51.30
   0 -18   1  643.70   52.95
   0 -18  -1  511.20   42.45
   0 -18  -1  591.20   49.79
   0  18   1  570.00   48.45
   0  18   1  645.80   53.00
   0  18  -1  564.00   46.48
   0  18  -1  592.60   49.81
   0 -18   2  143.40   13.76
   0 -18   2  172.00   19.01
   0 -18  -2  147.10   15.39
   0 -18  -2  145.40   16.18
   0  18   2  148.50   15.39
   0  18   2  137.60   18.13
   0  18  -2  138.80   15.71
   0  18  -2  143.00   14.25
   0 -18   3 3353.00  269.60
   0 -18   3 3292.00  263.80
   0 -18  -3 3067.00  246.20
   0 -18  -3 3031.00  243.40
   0  18   3 3302.00  265.60
   0  18   3 2584.00  207.70
   0  18  -3 2992.00  240.30
   0  18  -3 3044.00  244.20
   0 -18   4  623.70   53.54
   0 -18   4  601.00   49.72
   0 -18  -4  708.90   58.64
   0 -18  -4  780.70   64.40
   0  18   4  720.00   60.25
   0  18   4  651.10   56.03
   0  18  -4  883.70   72.38
   0  18  -4  895.00   73.08
   0 -18   5   39.96   15.19
   0 -18   5   20.96    9.09
   0 -18  -5   12.11   12.02
   0 -18  -5   30.84    9.58
   0  18   5   19.48   13.47
   0  18   5   13.87   13.25
   0  18  -5    2.88   12.62
   0  18  -5   14.35    9.12
   0 -18   6   -6.39   17.57
   0 -18   6   29.69    9.24
   0 -18  -6   25.92   13.80
   0 -18  -6   31.10    9.14
   0  18   6   27.50   14.82
   0  18   6   10.08   15.58
   0  18  -6   28.18   10.43
   0  18  -6   19.17   14.88
   0 -18   7  488.40   41.98
   0 -18  -7  507.30   45.51
   0 -18  -7  398.90   35.41
   0  18   7  435.40   40.50
   0  18   7  438.50   42.28
   0  18  -7  542.80   48.08
   0 -18   8  172.60   18.76
   0 -18   8  168.60   27.37
   0 -18  -8  231.50   27.16
   0 -18  -8  197.30   20.90
   0  18   8  230.10   24.77
   0  18  -8  224.70   27.94
   0  18  -8  168.40   21.26
   0 -18   9   -1.40   27.55
   0 -18   9   -4.72   15.55
   0 -18  -9   10.98   20.37
   0 -18  -9   -2.71   11.43
   0  18   9  -19.68   24.22
   0  18   9    4.99   22.38
   0  18  -9  -10.88   16.45
   0  18  -9   40.86   21.14
   0 -18  10  110.40   33.14
   0 -18  10  107.50   16.98
   0 -18 -10   96.99   24.10
   0 -18 -10  122.20   18.25
   0  18  10  103.20   27.14
   0  18  10  148.70   24.20
   0  18 -10  119.00   17.97
   0  18 -10  115.90   25.27
   0 -18  11   58.47   15.73
   0 -18  11   45.20   37.51
   0 -18 -11  106.00   28.06
   0 -18 -11   49.63   20.63
   0  18  11  114.80   31.50
   0  18  11  125.60   32.92
   0  18 -11  109.70   22.22
   0  18 -11   77.35   28.00
   0 -18  12   48.44   26.65
   0 -18  12   61.96   42.65
   0 -18 -12   41.95   19.84
   0 -18 -12   38.90   22.57
   0  18  12   48.20   23.67
   0  18  12   18.27   25.88
   0  18 -12   13.91   16.02
   0  18 -12   31.87   22.43
   0 -18  13   47.78   21.53
   0 -18  13   63.24   33.33
   0 -18 -13   70.75   22.28
   0 -18 -13    6.07   36.41
   0  18  13   42.20   28.70
   0  18  13  -19.21   37.53
   0  18 -13   -4.53   37.10
   0  18 -13   59.86   30.84
   0 -19   0    3.40    7.77
   0 -19   0    7.95   11.75
   0  19   0   -7.74    7.12
   0  19   0   -6.15   11.31
   0 -19   1   57.83   11.62
   0 -19   1   60.17    9.14
   0 -19  -1   94.26   14.24
   0 -19  -1   71.77   10.68
   0  19   1   62.89   13.21
   0  19   1   79.46   10.21
   0  19  -1   62.02    8.91
   0  19  -1   57.99   11.45
   0 -19   2 1611.00  131.00
   0 -19   2 1368.00  110.40
   0 -19  -2 1401.00  113.80
   0  19   2 1537.00  125.20
   0  19   2 1509.00  121.70
   0  19  -2 1356.00  110.10
   0  19  -2 1313.00  106.20
   0 -19   3  384.10   34.88
   0 -19   3  410.00   34.53
   0 -19  -3  352.50   30.74
   0 -19  -3  422.70   36.28
   0  19   3  335.00   29.81
   0  19   3  367.80   34.20
   0  19  -3  349.00   30.01
   0  19  -3  433.40   37.36
   0 -19   4  287.40   25.12
   0 -19   4  241.20   25.84
   0 -19  -4  232.40   22.62
   0 -19  -4  289.10   26.24
   0  19   4  306.50   28.47
   0  19   4  350.40   33.44
   0  19  -4  309.70   28.23
   0 -19   5   29.80   16.12
   0 -19   5   20.66    9.54
   0 -19  -5    4.37    9.02
   0 -19  -5    9.09   13.14
   0  19   5   23.63   15.72
   0  19   5    7.51   13.49
   0  19  -5    3.07   12.42
   0  19  -5   15.02    9.31
   0 -19   6  584.60   49.24
   0 -19   6  548.00   49.90
   0 -19  -6  555.10   47.98
   0  19   6  612.90   53.37
   0  19   6  685.80   59.33
   0  19  -6  512.70   45.15
   0  19  -6  550.90   46.63
   0 -19   7  -16.89   22.22
   0 -19   7    8.23   12.41
   0 -19  -7   11.02   14.28
   0 -19  -7   21.71   12.57
   0  19   7   17.53   18.86
   0  19   7    5.66   18.45
   0  19  -7    9.38   12.42
   0  19  -7   16.33   17.55
   0 -19   8  513.30   50.67
   0 -19   8  700.10   58.54
   0 -19  -8  495.60   45.53
   0 -19  -8  474.50   40.73
   0  19   8  458.00   41.99
   0  19   8  584.50   53.73
   0  19  -8  551.50   48.16
   0  19  -8  628.00   55.77
   0 -19   9  100.30   30.92
   0 -19   9   56.42   15.35
   0 -19  -9   45.25   18.61
   0 -19  -9   76.07   16.34
   0  19   9   77.75   24.34
   0  19   9   70.99   19.74
   0  19  -9   72.55   22.81
   0  19  -9   58.19   15.23
   0 -19  10   48.75   14.62
   0 -19  10   76.40   27.78
   0 -19 -10   99.07   25.40
   0 -19 -10  100.10   15.28
   0  19  10   76.96   22.65
   0  19  10   62.37   27.50
   0  19 -10   30.08   23.57
   0  19 -10   63.82   19.03
   0 -19  11   31.38   41.39
   0 -19  11    9.91   14.27
   0 -19 -11   -4.72   27.49
   0 -19 -11   -6.89   18.65
   0  19  11  -20.01   30.70
   0  19  11  -19.63   26.88
   0  19 -11   -1.16   28.94
   0  19 -11   19.42   17.93
   0 -19  12   67.22   19.25
   0 -19  12   44.00   31.69
   0 -19 -12   -9.29   21.16
   0 -19 -12   37.77   18.34
   0  19  12   46.31   30.63
   0  19  12  100.50   24.38
   0  19 -12   66.67   28.95
   0  19 -12   50.31   23.53
   0 -19  13   24.54   40.12
   0 -19  13   25.87   26.82
   0 -19 -13   47.65   29.93
   0 -19 -13  -29.96   34.52
   0  19  13   41.48   39.98
   0  19  13   37.51   36.57
   0  19 -13   -9.42   26.57
   0  19 -13   11.59   22.40
   0 -20   0  901.80   74.74
   0 -20   0  771.70   63.14
   0  20   0  654.10   55.30
   0  20   0  806.20   65.78
   0 -20   1  451.90   38.10
   0 -20   1  456.10   39.71
   0 -20  -1  447.10   39.20
   0 -20  -1  439.40   37.10
   0  20   1  467.50   39.03
   0  20   1  329.50   29.83
   0  20  -1  411.40   36.19
   0  20  -1  359.60   30.50
   0 -20   2    5.27    6.73
   0 -20   2  -13.21   12.98
   0 -20  -2  -11.95   10.34
   0 -20  -2   10.24    8.65
   0  20   2   -2.26   13.80
   0  20   2    4.29    8.96
   0  20  -2    8.17   10.43
   0  20  -2    5.93    8.16
   0 -20   3  551.50   47.82
   0 -20   3  534.50   44.47
   0 -20  -3  576.80   48.10
   0 -20  -3  439.30   38.30
   0  20   3  491.30   44.22
   0  20   3  493.60   41.88
   0  20  -3  555.70   47.09
   0  20  -3  554.40   46.18
   0 -20   4  345.20   29.65
   0 -20   4  430.20   39.76
   0 -20  -4  463.70   39.75
   0 -20  -4  334.20   30.42
   0  20   4  437.40   39.59
   0  20   4  324.70   29.86
   0  20  -4  378.50   33.06
   0  20  -4  390.20   34.46
   0 -20   5   45.38   17.59
   0 -20   5   18.97    9.76
   0 -20  -5   28.37   13.01
   0 -20  -5   20.97   11.43
   0  20   5   43.09   17.56
   0  20   5   42.14   14.14
   0  20  -5   23.57    9.37
   0  20  -5   13.09   11.40
   0 -20   6   33.64   11.78
   0 -20   6   73.90   21.42
   0 -20  -6   64.59   12.78
   0 -20  -6   44.71   13.06
   0  20   6   22.42   16.34
   0  20   6   22.67   17.30
   0  20  -6   19.68   15.30
   0  20  -6   36.76   11.37
   0 -20   7  411.40   44.88
   0 -20  -7  461.80   41.07
   0 -20  -7  429.60   39.83
   0  20   7  418.80   40.21
   0  20   7  387.80   37.65
   0  20  -7  383.20   38.03
   0  20  -7  374.80   34.02
   0 -20   8  329.00   29.95
   0 -20   8  325.50   39.64
   0 -20  -8  316.80   28.79
   0 -20  -8  302.90   30.64
   0  20   8  444.40   42.23
   0  20   8  344.90   38.15
   0  20  -8  327.80   31.26
   0  20  -8  286.80   31.62
   0 -20   9   58.10   27.66
   0 -20   9   72.16   15.62
   0 -20  -9   57.14   20.35
   0 -20  -9   26.04   16.01
   0  20   9   43.61   24.92
   0  20   9   44.84   24.70
   0  20  -9   35.88   16.44
   0  20  -9   39.94   22.80
   0 -20  10   59.59   18.74
   0 -20  10   35.27   33.72
   0 -20 -10   58.01   22.68
   0 -20 -10   66.11   17.62
   0  20  10   29.03   26.35
   0  20  10  114.50   23.30
   0  20 -10   70.76   15.13
   0  20 -10   47.29   20.54
   0 -20  11  161.30   30.45
   0 -20  11   97.04   22.07
   0 -20 -11  139.00   19.18
   0 -20 -11  113.00   26.30
   0  20  11  115.00   25.42
   0  20  11  149.80   28.09
   0  20 -11  147.00   25.55
   0  20 -11  161.50   26.16
   0 -20  12   -4.82   29.20
   0 -20  12  -10.81   19.12
   0 -20 -12  -20.10   25.72
   0 -20 -12    4.75   23.29
   0  20  12  -19.64   22.74
   0  20  12  -20.11   34.80
   0  20 -12  -17.27   33.10
   0  20 -12   36.27   22.81
   0 -20  13  -31.43   47.83
   0 -20  13   16.47   28.77
   0 -20 -13   17.87   24.54
   0 -20 -13   39.62   31.87
   0  20  13   27.89   29.68
   0  20  13    6.94   35.11
   0 -21   0    8.58   13.00
   0 -21   0    6.49    8.63
   0  21   0   -1.76   11.85
   0  21   0   -6.59    7.76
   0 -21   1  460.90   40.66
   0 -21   1  488.40   40.95
   0 -21  -1  485.10   42.36
   0 -21  -1  456.50   38.51
   0  21   1  483.20   40.33
   0  21   1  423.50   38.04
   0  21  -1  419.20   36.65
   0  21  -1  402.80   34.01
   0 -21   2    8.61   14.20
   0 -21   2    6.77    7.44
   0 -21  -2   -0.05   12.19
   0 -21  -2   18.96    9.35
   0  21   2   13.71   13.29
   0  21   2   -0.32    8.65
   0  21  -2   11.52   11.27
   0  21  -2    3.18    7.93
   0 -21   3  331.10   28.80
   0 -21   3  326.20   31.56
   0 -21  -3  290.90   26.80
   0 -21  -3  362.40   32.57
   0  21   3  306.50   27.77
   0  21   3  355.40   33.44
   0  21  -3  314.60   28.07
   0  21  -3  325.50   28.78
   0 -21   4   77.13   10.88
   0 -21   4   42.96   16.44
   0 -21  -4   82.46   14.89
   0 -21  -4   81.05   14.31
   0  21   4   60.25   11.07
   0  21   4   55.44   15.72
   0  21  -4   70.75   12.19
   0  21  -4   65.22   13.56
   0 -21   5  835.80   68.70
   0 -21   5  662.20   57.57
   0 -21  -5  618.40   52.43
   0 -21  -5  677.90   56.82
   0  21   5  613.90   52.38
   0  21   5  776.60   66.26
   0  21  -5  820.90   68.24
   0  21  -5  664.10   55.29
   0 -21   6  112.60   23.25
   0 -21   6   89.30   14.37
   0 -21  -6   69.60   15.05
   0  21   6   70.24   17.37
   0  21  -6  108.30   18.14
   0  21  -6   87.82   13.79
   0 -21   7   33.31   28.14
   0 -21   7   27.52   14.86
   0 -21  -7   23.16   14.50
   0 -21  -7   23.67   16.77
   0  21   7   30.81   21.59
   0  21   7   20.00   19.28
   0  21  -7    0.45   19.37
   0  21  -7   19.89   13.04
   0 -21   8   14.91   28.32
   0 -21   8   -6.18   13.04
   0 -21  -8   -3.49   13.89
   0 -21  -8   -1.98   19.11
   0  21   8   23.08   24.38
   0  21   8    9.00   19.99
   0  21  -8   -3.24   13.42
   0  21  -8   -9.36   18.28
   0 -21   9  315.30   29.89
   0 -21   9  286.50   39.39
   0 -21  -9  288.40   32.18
   0 -21  -9  201.70   23.88
   0  21   9  254.50   30.49
   0  21   9  255.70   33.69
   0  21  -9  216.60   25.28
   0  21  -9  223.00   30.20
   0 -21  10   38.37   19.67
   0 -21  10    9.72   27.54
   0 -21 -10    5.18   18.40
   0 -21 -10   34.87   19.55
   0  21  10   -0.46   25.70
   0  21  10   11.66   24.53
   0  21 -10   24.00   18.88
   0  21 -10   23.73   20.40
   0 -21  11   12.70   22.08
   0 -21  11   49.72   38.04
   0 -21 -11   34.25   20.11
   0 -21 -11   19.61   18.04
   0  21  11   42.77   25.17
   0  21  11   31.28   33.54
   0  21 -11   10.02   22.65
   0  21 -11   76.59   17.96
   0 -21  12   26.57   25.82
   0 -21  12  -39.32   42.35
   0 -21 -12   36.32   24.36
   0 -21 -12    3.70   20.14
   0  21  12   29.09   25.04
   0  21  12  -11.12   29.00
   0  21 -12   10.84   18.31
   0  21 -12  -10.72   23.85
   0 -21  13  104.80   37.55
   0 -21  13   96.35   23.98
   0 -21 -13   75.72   31.52
   0 -21 -13   85.67   23.36
   0  21  13   37.99   34.00
   0  21  13   89.49   33.48
   0  21 -13   69.05   37.28
   0  21 -13  122.90   32.46
   0  22   0  605.60   50.08
   0  22   0  523.40   45.70
   0 -22   1  738.00   60.52
   0 -22   1  773.50   65.41
   0 -22  -1  749.10   61.76
   0  22   1  683.90   57.84
   0  22   1  733.60   60.18
   0  22  -1  758.10   62.09
   0  22  -1  709.90   59.30
   0 -22   2  193.70   22.23
   0 -22   2  139.10   14.59
   0 -22  -2  181.50   20.47
   0 -22  -2  194.60   19.31
   0  22   2  140.70   15.50
   0  22   2  128.60   19.62
   0  22  -2  113.40   15.66
   0  22  -2  152.30   15.80
   0 -22   3  583.60   48.39
   0 -22  -3  689.10   57.65
   0 -22  -3  694.10   57.47
   0  22   3  556.30   46.94
   0  22   3  594.90   52.35
   0  22  -3  527.70   44.49
   0  22  -3  538.30   46.00
   0 -22   4  549.90   48.83
   0 -22   4  480.20   40.51
   0 -22  -4  454.30   39.38
   0 -22  -4  486.10   41.82
   0  22   4  494.00   43.04
   0  22   4  461.40   42.58
   0  22  -4  532.10   45.05
   0  22  -4  495.00   42.89
   0 -22   5    4.05   10.23
   0 -22   5   10.01   18.55
   0 -22  -5   -2.74   12.82
   0 -22  -5  -10.24   13.28
   0  22   5   11.70   17.29
   0  22   5   -5.82   10.10
   0  22  -5   -4.10   11.92
   0  22  -5    0.32   10.01
   0 -22   6   29.15   21.41
   0 -22   6    2.43   11.62
   0 -22  -6   -8.26   12.47
   0 -22  -6   12.24   13.26
   0  22   6  -17.98   21.47
   0  22   6   15.56   14.59
   0  22  -6   11.76   15.55
   0  22  -6   11.19   11.07
   0 -22   7   77.54   30.45
   0 -22   7   85.48   16.64
   0 -22  -7   91.29   15.27
   0 -22  -7   74.34   19.86
   0  22   7   95.84   23.46
   0  22   7   80.66   15.76
   0  22  -7   86.90   21.81
   0  22  -7   69.60   14.95
   0 -22   8   11.27   14.51
   0 -22   8   18.50   29.13
   0 -22  -8  -10.63   18.24
   0 -22  -8    7.76   14.77
   0  22   8   20.94   19.29
   0  22   8   17.02   24.38
   0  22  -8   16.19   14.34
   0  22  -8   18.62   16.81
   0 -22   9   18.94   32.29
   0 -22   9    5.36   14.86
   0 -22  -9   12.51   13.38
   0 -22  -9    2.07   19.36
   0  22   9    0.81   22.17
   0  22   9   22.34   23.70
   0  22  -9   -3.46   20.21
   0  22  -9   -6.76   12.93
   0 -22  10   38.84   19.66
   0 -22  10  163.30   40.57
   0 -22 -10   96.83   26.03
   0 -22 -10   72.70   16.85
   0  22  10   61.84   21.16
   0  22  10   56.17   27.44
   0  22 -10   82.43   25.69
   0  22 -10   70.65   16.87
   0 -22  11   34.11   17.53
   0 -22  11   57.15   28.87
   0 -22 -11   33.96   19.92
   0 -22 -11   39.86   23.28
   0  22  11   39.85   30.24
   0  22  11   44.67   29.27
   0  22 -11   52.64   23.11
   0  22 -11   45.51   29.02
   0 -22  12   51.72   24.37
   0 -22  12   77.38   32.89
   0 -22 -12   52.38   20.17
   0 -22 -12   29.32   31.07
   0  22  12   31.79   31.77
   0  22  12  112.20   35.58
   0  22 -12   42.69   26.76
   0  22 -12   60.12   32.08
   0 -22  13   11.43   38.08
   0 -22  13    0.20   30.54
   0 -22 -13  -13.43   31.29
   0 -22 -13   27.16   31.30
   0  22  13   -1.63   29.24
   0  22  13  -16.18   37.64
   0  22 -13    2.01   24.24
   0  22 -13  -10.60   25.21
   0 -23   0    6.45    9.59
   0 -23   0   -2.92   15.23
   0  23   0  -13.96   13.87
   0  23   0    6.93    9.28
   0 -23   1   38.44   14.30
   0 -23   1   34.65    9.45
   0 -23  -1   55.98   11.08
   0 -23  -1   -2.35   14.05
   0  23   1   31.18   13.85
   0  23   1   47.19    9.78
   0  23  -1   21.85    8.81
   0  23  -1   30.03   13.16
   0 -23   2 2455.00  198.50
   0 -23   2 2133.00  171.50
   0 -23   2 2392.00  193.40
   0 -23  -2 2655.00  213.70
   0 -23  -2 1964.00  158.70
   0  23   2 2440.00  197.40
   0  23   2 2274.00  183.10
   0  23  -2 2081.00  167.60
   0  23  -2 2253.00  181.70
   0 -23   3  117.10   13.46
   0 -23   3  147.50   21.02
   0 -23  -3   94.07   16.31
   0  23   3   86.99   18.82
   0  23   3  112.80   14.88
   0  23  -3  117.80   16.77
   0  23  -3  109.40   14.30
   0 -23   4   73.84   11.20
   0 -23   4   95.67   20.11
   0 -23  -4   85.82   15.71
   0 -23  -4   47.55   12.92
   0  23   4   46.78   14.56
   0  23   4   78.82   17.21
   0  23  -4   88.39   15.83
   0  23  -4   79.05   12.86
   0 -23   5    3.82   10.71
   0 -23   5    4.65   17.64
   0 -23  -5    2.56   12.44
   0 -23  -5    4.10   11.33
   0  23   5   -9.24   19.23
   0  23   5    4.68   15.15
   0  23  -5   -8.80   11.07
   0  23  -5  -15.63   14.47
   0 -23   6 1078.00   88.42
   0 -23   6  861.80   76.01
   0 -23  -6 1159.00   95.73
   0 -23  -6 1104.00   90.48
   0  23   6 1041.00   86.24
   0  23   6 1274.00  105.80
   0  23  -6 1202.00   99.36
   0  23  -6 1184.00   97.03
   0 -23   7   -2.69   27.68
   0 -23   7  -16.20   12.33
   0 -23  -7    5.68   16.47
   0 -23  -7   -6.35   12.28
   0  23   7   11.44   25.09
   0  23   7    5.21   19.16
   0  23  -7   -7.65   20.16
   0  23  -7  -17.27   14.18
   0 -23   8   86.66   32.41
   0 -23   8   70.09   17.38
   0 -23  -8  111.40   16.40
   0 -23  -8   60.06   20.49
   0  23   8   66.01   26.81
   0  23   8   72.35   18.36
   0  23  -8   85.36   16.91
   0  23  -8   91.61   19.99
   0 -23   9  -18.26   18.24
   0 -23   9  -28.18   31.01
   0 -23  -9   -6.04   14.56
   0 -23  -9    7.34   20.68
   0  23   9   10.07   24.29
   0  23   9   -2.66   26.16
   0  23  -9    2.16   15.32
   0  23  -9    3.57   17.47
   0 -23  10  119.10   18.38
   0 -23  10   72.34   30.41
   0 -23 -10   79.09   27.65
   0 -23 -10  129.80   20.43
   0  23  10   51.37   29.25
   0  23  10   21.85   29.92
   0  23 -10   92.57   28.49
   0  23 -10   55.37   20.22
   0 -23  11  -24.62   42.63
   0 -23  11    2.71   17.22
   0 -23 -11    1.26   14.41
   0 -23 -11  -28.13   29.24
   0  23  11  -18.38   27.79
   0  23  11   13.63   30.83
   0  23 -11    4.72   28.25
   0  23 -11  -12.46   15.26
   0 -23 -12   94.56   27.57
   0 -23 -12  109.00   34.36
   0  23  12   58.09   35.22
   0  23  12   77.13   32.80
   0  23 -12  123.50   23.39
   0  23 -12   99.45   38.56
   0 -23  13   -9.79   22.66
   0 -23  13   31.30   51.50
   0 -23 -13   -0.93   27.22
   0 -23 -13  -17.38   24.16
   0  23  13  -28.06   31.15
   0  23  13    8.58   27.08
   0  23 -13    0.01   34.32
   0  23 -13   15.52   20.60
   0 -24   0  103.40   18.55
   0 -24   0  137.50   15.81
   0  24   0   94.93   17.04
   0  24   0  118.00   14.07
   0 -24   1  457.30   38.83
   0 -24   1  534.50   46.91
   0 -24  -1  597.50   51.79
   0 -24  -1  644.10   53.57
   0  24   1  377.00   32.83
   0  24  -1  435.10   37.12
   0  24  -1  443.60   39.58
   0 -24   2   89.28   17.89
   0 -24   2   59.88   10.19
   0 -24   2   40.91   15.14
   0 -24  -2   63.68   14.74
   0 -24  -2   58.18   11.50
   0  24   2   45.20   11.71
   0  24   2   72.81   17.07
   0  24  -2   47.65   14.10
   0  24  -2   61.28   10.95
   0 -24   3  302.20   31.56
   0 -24   3  360.60   31.29
   0 -24  -3  403.90   36.81
   0 -24  -3  365.50   32.46
   0  24   3  353.80   31.66
   0  24  -3  419.90   36.58
   0  24  -3  329.40   30.64
   0 -24   4  210.70   25.72
   0 -24   4  225.50   21.74
   0 -24  -4  213.70   22.36
   0 -24  -4  227.00   24.29
   0  24   4  210.40   22.43
   0  24   4  208.00   26.42
   0  24  -4  182.00   19.24
   0  24  -4  208.60   22.86
   0 -24   5   94.11   13.85
   0 -24   5  110.70   23.14
   0 -24  -5  109.60   17.77
   0  24   5  128.10   23.21
   0  24  -5  136.70   17.50
   0  24  -5   88.76   18.17
   0 -24   6  213.70   22.81
   0 -24  -6  202.30   23.41
   0 -24  -6  242.80   24.63
   0  24   6  240.50   31.04
   0  24   6  289.50   30.93
   0  24  -6  266.50   29.56
   0 -24   7  807.50   73.78
   0 -24   7  762.00   63.73
   0 -24  -7  751.50   64.84
   0 -24  -7  719.70   61.46
   0  24   7  739.80   66.80
   0  24   7  659.20   57.64
   0  24  -7  783.00   65.99
   0  24  -7  572.40   51.59
   0 -24   8   73.42   18.27
   0 -24   8  127.50   34.94
   0 -24  -8   88.48   22.03
   0 -24  -8   75.73   15.16
   0  24   8   74.85   25.42
   0  24   8   67.24   23.28
   0  24  -8   82.86   16.84
   0  24  -8   60.99   22.87
   0 -24   9   22.42   19.46
   0 -24   9   21.16   35.90
   0 -24  -9   35.77   16.76
   0 -24  -9   26.21   22.63
   0  24   9   -3.54   22.39
   0  24   9   25.98   26.69
   0  24  -9   39.33   17.15
   0  24  -9   31.31   24.65
   0 -24  10    8.40   17.79
   0 -24  10   33.65   40.74
   0 -24 -10   24.05   19.08
   0 -24 -10   22.36   25.17
   0  24  10   27.27   25.76
   0  24  10   -5.63   25.78
   0  24 -10   19.49   21.96
   0  24 -10    5.78   17.42
   0 -24  11  165.60   29.08
   0 -24  11  109.50   34.75
   0 -24 -11   59.18   30.02
   0 -24 -11  143.30   24.62
   0  24  11  136.20   39.72
   0  24  11  115.30   34.12
   0  24 -11   74.87   25.36
   0  24 -11  139.40   25.05
   0 -24  12   39.65   49.01
   0 -24  12  -25.08   29.37
   0 -24 -12   54.81   34.14
   0 -24 -12   -5.31   19.12
   0  24  12  -11.56   33.09
   0  24  12   23.46   28.92
   0  24 -12   24.88   22.93
   0  24 -12   -2.97   27.58
   0 -24  13   16.45   28.07
   0 -24  13  -18.69   40.06
   0 -24 -13   50.56   35.33
   0 -24 -13   12.95   25.14
   0  24  13   22.98   26.91
   0  24  13  -37.01   43.41
   0  24 -13   14.96   28.56
   0  24 -13   34.74   26.69
   0 -25   0  -14.44   17.05
   0 -25   0   11.20   10.03
   0  25   0   13.73   10.22
   0  25   0   25.32   15.21
   0 -25   1  462.70   39.42
   0 -25   1  494.10   44.54
   0 -25  -1  584.30   49.21
   0 -25  -1  463.50   42.01
   0  25   1  535.70   45.31
   0  25   1  565.40   49.78
   0  25   1  446.40   40.92
   0  25  -1  490.10   43.41
   0  25  -1  470.10   39.98
   0 -25   2  162.20   21.00
   0 -25   2  130.40   20.25
   0 -25   2  127.20   14.24
   0 -25  -2  160.40   20.47
   0 -25  -2  154.00   17.17
   0  25   2  132.00   16.31
   0  25   2  132.80   20.57
   0  25  -2  177.10   18.35
   0  25  -2  173.20   20.04
   0 -25   3  738.90   61.00
   0 -25   3  559.80   50.20
   0 -25  -3  705.50   58.87
   0  25   3  759.30   63.78
   0  25   3  704.40   61.31
   0  25  -3  634.10   53.00
   0  25  -3  588.20   50.46
   0 -25   4  -13.14   18.85
   0 -25   4    2.70    9.61
   0 -25  -4   19.80   14.63
   0 -25  -4   15.74   12.55
   0  25   4   11.56   19.28
   0  25   4   -0.37   14.33
   0  25  -4    5.05   11.29
   0  25  -4   17.35   14.70
   0 -25   5  708.90   58.94
   0 -25   5  632.80   57.16
   0 -25  -5  659.40   56.48
   0  25   5  654.70   55.88
   0  25   5  716.90   64.80
   0  25  -5  556.40   48.98
   0  25  -5  567.20   48.81
   0 -25   6   42.57   13.02
   0 -25   6   38.66   27.99
   0 -25  -6   57.97   17.08
   0 -25  -6   38.74   15.54
   0  25   6    8.59   20.32
   0  25   6   51.10   15.08
   0  25  -6   35.89   19.76
   0  25  -6   77.43   18.04
   0 -25   7   51.47   28.87
   0 -25   7   33.60   13.65
   0 -25  -7    9.55   15.26
   0 -25  -7   27.46   14.12
   0  25   7   43.66   26.13
   0  25   7    9.89   13.97
   0  25  -7   40.30   18.66
   0  25  -7   13.65   15.62
   0 -25   8   24.88   16.47
   0 -25   8   -0.68   33.28
   0 -25  -8    7.86   17.73
   0 -25  -8   27.62   16.17
   0  25   8  -17.88   28.14
   0  25   8   23.09   23.11
   0  25  -8   28.77   16.16
   0  25  -8   17.65   23.61
   0 -25   9  280.40   45.62
   0 -25   9  336.90   33.46
   0 -25  -9  306.80   28.77
   0 -25  -9  319.90   36.41
   0  25   9  301.20   36.12
   0  25   9  292.00   34.10
   0  25  -9  269.20   27.49
   0  25  -9  312.60   37.90
   0 -25  10  -13.02   21.96
   0 -25  10   13.49   32.90
   0 -25 -10   10.90   20.13
   0 -25 -10    5.86   13.58
   0  25  10   -7.10   28.86
   0  25  10   -7.71   29.31
   0  25 -10    1.06   19.72
   0  25 -10   -2.10   24.05
   0 -25  11  -23.50   48.52
   0 -25  11   23.39   19.86
   0 -25 -11   23.83   17.77
   0 -25 -11   13.34   30.57
   0  25  11  -10.11   28.45
   0  25  11   21.36   31.26
   0  25 -11   -0.43   33.60
   0  25 -11    9.00   15.40
   0 -25  12  -11.02   20.62
   0 -25  12   49.59   36.78
   0 -25 -12   11.47   27.64
   0 -25 -12   30.92   32.50
   0  25  12    7.73   40.02
   0  25  12   -1.54   31.26
   0  25 -12   47.80   38.81
   0  25 -12   -1.59   26.01
   0 -26   0 1474.00  119.50
   0 -26   0 1438.00  118.20
   0  26   0 1349.00  109.40
   0  26   0 1230.00  101.50
   0 -26   1   76.81   13.40
   0 -26   1  110.20   19.64
   0 -26  -1  134.90   16.07
   0 -26  -1  115.00   19.66
   0  26   1   83.59   18.17
   0  26   1  115.80   15.09
   0  26   1  102.60   20.31
   0  26  -1  152.30   17.32
   0  26  -1   96.98   17.05
   0 -26   2  208.00   20.17
   0 -26  -2  171.10   21.65
   0 -26  -2  193.80   20.50
   0  26   2  152.10   17.97
   0  26   2  226.40   26.79
   0  26  -2  159.20   17.25
   0  26  -2  144.80   19.53
   0 -26   3  374.40   32.77
   0 -26   3  401.80   39.01
   0 -26  -3  447.90   39.33
   0 -26  -3  378.00   35.62
   0  26   3  309.70   29.35
   0  26   3  348.70   36.52
   0  26  -3  401.30   35.13
   0  26  -3  293.10   28.72
   0 -26   4  967.60   82.26
   0 -26   4  708.50   58.83
   0 -26  -4  776.90   65.43
   0 -26  -4  827.20   68.88
   0  26   4  746.20   65.84
   0  26   4  668.70   57.23
   0  26  -4  695.20   58.27
   0  26  -4  801.20   67.46
   0 -26   5    1.47    9.62
   0 -26   5   -3.70   21.85
   0 -26  -5   -6.30   15.78
   0 -26  -5   -7.71   15.72
   0  26   5   -9.42   20.48
   0  26   5   14.54   15.73
   0  26  -5    9.10   12.63
   0  26  -5   -0.77   14.83
   0 -26   6  -10.44   29.83
   0 -26   6   -5.82   12.45
   0 -26  -6    2.93   10.73
   0 -26  -6   25.46   18.38
   0  26   6   15.63   25.06
   0  26   6   -7.67   18.18
   0  26  -6   17.91   15.65
   0 -26   7   67.26   17.49
   0 -26   7   53.58   30.51
   0 -26  -7   51.93   21.34
   0 -26  -7   47.84   15.20
   0  26   7   54.58   20.32
   0  26   7   63.78   28.48
   0  26  -7   66.73   21.57
   0  26  -7   61.57   17.90
   0 -26   8  330.40   32.16
   0 -26   8  409.00   48.73
   0 -26  -8  370.30   37.86
   0 -26  -8  395.40   35.24
   0  26   8  340.20   42.22
   0  26   8  357.60   37.21
   0  26  -8  303.50   34.72
   0  26  -8  388.50   38.34
   0 -26   9   -5.97   33.09
   0 -26   9   37.53   17.29
   0 -26  -9   21.21   17.16
   0 -26  -9   26.33   21.14
   0  26   9   91.48   32.72
   0  26   9   47.24   25.57
   0  26  -9   42.02   23.12
   0  26  -9   28.99   18.66
   0 -26  10  146.70   43.53
   0 -26  10  121.00   21.03
   0 -26 -10   96.03   21.93
   0 -26 -10  149.50   29.95
   0  26  10   99.94   35.95
   0  26  10  104.80   32.32
   0  26 -10   85.08   32.19
   0  26 -10   93.84   22.20
   0 -26  11   -2.24   24.11
   0 -26 -11   26.34   27.00
   0 -26 -11    8.16   20.85
   0  26  11  -12.93   38.85
   0  26  11  -16.75   27.05
   0  26 -11   31.12   23.27
   0  26 -11  -11.86   24.64
   0 -26  12   74.34   29.01
   0 -26  12   29.69   55.74
   0 -26 -12   30.10   29.92
   0 -26 -12   70.27   21.02
   0  26  12   29.58   30.64
   0  26  12   14.58   29.52
   0  26 -12   80.46   20.99
   0  26 -12   65.69   27.45
   0 -27   0   -1.57   11.01
   0 -27   0  -17.96   18.42
   0  27   0    7.03   10.12
   0  27   0   -5.27   17.26
   0 -27   1  293.30   27.01
   0 -27   1  282.50   31.17
   0 -27  -1  272.60   28.98
   0 -27  -1  245.20   23.95
   0  27   1  239.30   27.83
   0  27   1  197.20   20.46
   0  27   1  230.80   26.44
   0  27  -1  193.80   23.04
   0  27  -1  294.00   26.83
   0 -27   2  436.60   40.61
   0 -27   2  377.50   32.93
   0 -27  -2  378.70   33.78
   0 -27  -2  356.20   34.56
   0  27   2  433.20   40.96
   0  27   2  339.40   31.28
   0  27  -2  355.60   34.13
   0  27  -2  316.70   28.33
   0 -27   3   89.56   13.34
   0 -27   3   86.76   20.31
   0 -27  -3  113.00   19.96
   0 -27  -3   63.77   13.95
   0  27   3  102.80   16.08
   0  27   3   77.23   20.66
   0  27  -3   79.47   16.79
   0  27  -3  107.40   15.13
   0 -27   4   79.38   12.95
   0 -27   4  119.30   25.20
   0 -27  -4  122.10   18.25
   0 -27  -4  120.10   21.30
   0  27   4   99.11   25.05
   0  27   4  109.80   15.54
   0  27  -4  105.20   18.76
   0  27  -4   74.39   14.52
   0 -27   5   88.45   30.66
   0 -27   5  140.20   17.46
   0 -27  -5  113.60   18.42
   0 -27  -5  144.40   20.76
   0  27   5  143.70   18.99
   0  27   5   82.26   27.16
   0  27  -5   92.10   19.09
   0  27  -5  138.00   19.11
   0 -27   6  725.10   62.02
   0 -27   6  573.50   56.38
   0 -27  -6  696.00   59.57
   0 -27  -6  562.10   50.43
   0  27   6  696.00   59.83
   0  27   6  721.30   66.39
   0  27  -6  585.70   51.28
   0  27  -6  563.20   51.69
   0 -27   7  144.90   20.91
   0 -27   7  158.80   40.59
   0 -27  -7  180.70   26.11
   0 -27  -7  137.80   19.73
   0  27   7  204.90   24.00
   0  27   7  205.60   34.14
   0  27  -7  133.70   20.45
   0  27  -7  144.80   26.06
   0 -27   8  333.10   33.51
   0 -27   8  369.20   46.86
   0 -27  -8  377.00   38.40
   0 -27  -8  421.10   39.18
   0  27   8  288.30   38.08
   0  27   8  433.30   43.60
   0  27  -8  349.70   37.51
   0  27  -8  339.30   34.06
   0 -27   9   55.62   38.01
   0 -27   9   54.62   20.97
   0 -27  -9   64.09   26.42
   0 -27  -9   62.56   15.46
   0  27   9   17.63   20.53
   0  27   9   67.96   33.36
   0  27  -9   85.48   26.94
   0  27  -9   76.24   20.14
   0 -27  10   44.46   32.83
   0 -27  10   29.31   21.92
   0 -27 -10   77.36   28.51
   0 -27 -10   47.39   15.09
   0  27  10   63.93   36.84
   0  27  10   34.68   29.26
   0  27 -10    2.84   21.32
   0  27 -10   61.30   23.82
   0 -27  11  -50.85   45.43
   0 -27  11  -56.61   27.37
   0 -27 -11    3.29   24.20
   0 -27 -11   -5.09   20.35
   0  27  11   38.86   26.33
   0  27  11   22.19   28.46
   0  27 -11   -1.82   18.76
   0  27 -11  -11.37   31.84
   0 -27  12   12.49   45.05
   0 -27  12   44.84   27.18
   0 -27 -12   31.19   26.73
   0 -27 -12   13.81   28.57
   0  27  12   87.08   43.08
   0  27  12   13.73   27.27
   0  27 -12  106.80   42.77
   0  27 -12   43.84   27.91
   0 -28   0 1013.00   83.15
   0 -28   0  973.80   82.52
   0  28   0 1073.00   89.52
   0  28   0  937.80   76.99
   0 -28   1  420.60   40.95
   0 -28   1  461.70   40.06
   0 -28  -1  385.70   37.13
   0 -28  -1  369.60   33.06
   0  28   1  499.90   46.24
   0  28   1  372.80   33.25
   0  28   1  385.20   36.87
   0  28  -1  394.30   34.52
   0  28  -1  440.60   40.60
   0 -28   2   30.37   19.05
   0 -28   2   65.32   11.64
   0 -28  -2   30.00   12.65
   0 -28  -2   49.27   17.30
   0  28   2   36.86   13.71
   0  28   2   50.33   20.81
   0  28  -2   47.14   16.95
   0  28  -2   35.81   11.05
   0 -28   3  684.90   57.02
   0 -28   3  682.80   60.66
   0 -28   3  618.70   54.53
   0 -28  -3  536.90   46.44
   0 -28  -3  750.40   64.28
   0  28   3  531.70   45.96
   0  28  -3  476.90   41.49
   0  28  -3  553.30   48.87
   0 -28   4  204.90   20.65
   0 -28  -4  194.40   22.46
   0 -28  -4  130.30   20.53
   0  28   4  157.00   21.64
   0  28   4  176.70   29.71
   0  28  -4  239.70   25.18
   0  28  -4  186.80   23.74
   0 -28   5   -7.41   11.54
   0 -28  -5    0.66   15.85
   0 -28  -5   -4.07   16.81
   0  28   5   18.47   22.97
   0  28   5   -6.79   17.36
   0  28  -5  -15.48   18.85
   0 -28   6  111.90   18.55
   0 -28   6  122.20   30.64
   0 -28  -6  124.60   18.14
   0 -28  -6  158.30   23.55
   0  28   6  139.30   22.60
   0  28   6   88.71   27.18
   0  28  -6  163.30   25.85
   0  28  -6  107.80   19.34
   0 -28   7  256.60   41.20
   0 -28   7  249.80   26.19
   0 -28  -7  319.60   30.64
   0 -28  -7  366.90   38.77
   0  28   7  301.60   33.11
   0  28   7  240.10   35.82
   0  28  -7  254.20   28.12
   0  28  -7  287.60   35.18
   0 -28   8    4.81   17.11
   0 -28   8  -18.24   36.73
   0 -28  -8   20.31   12.50
   0 -28  -8   46.26   22.88
   0  28   8   -0.58   20.11
   0  28   8   39.58   29.89
   0  28  -8    0.37   25.13
   0  28  -8   -1.40   17.37
   0 -28   9   14.22   34.14
   0 -28   9   -7.65   17.56
   0 -28  -9   44.40   26.10
   0 -28  -9   20.44   17.19
   0  28   9   10.89   26.07
   0  28   9   47.76   31.19
   0  28  -9  -25.43   27.02
   0  28  -9    1.28   20.29
   0 -28  10   44.51   26.00
   0 -28  10   29.74   42.51
   0 -28 -10   52.20   28.06
   0 -28 -10   55.58   21.71
   0  28  10   48.69   31.48
   0  28  10   48.72   32.49
   0  28 -10   54.82   33.36
   0  28 -10   74.85   24.00
   0 -28  11  178.40   26.13
   0 -28  11  187.90   53.86
   0 -28 -11  229.80   31.82
   0 -28 -11  153.00   26.81
   0  28  11  125.50   51.38
   0  28  11  196.60   41.67
   0  28 -11  155.40   31.76
   0  28 -11  202.50   30.54
   0 -28  12  -36.03   26.15
   0 -28  12    0.96   36.00
   0 -28 -12   11.72   26.23
   0 -28 -12   19.54   20.92
   0  28  12   13.27   29.70
   0  28  12    1.62   33.10
   0  28 -12  -27.96   24.32
   0  28 -12   23.65   23.53
   0 -29   0   -8.64   19.42
   0 -29   0    4.78   11.64
   0  29   0    5.29   11.40
   0  29   0  -20.38   17.71
   0 -29   1  612.70   51.68
   0 -29   1  447.60   43.91
   0 -29  -1  433.30   40.50
   0 -29  -1  571.00   48.84
   0  29   1  518.50   48.33
   0  29  -1  401.30   37.93
   0  29  -1  539.90   45.79
   0 -29   2  217.10   27.75
   0 -29   2  252.60   23.97
   0 -29  -2  211.00   25.39
   0 -29  -2  231.10   23.88
   0  29   2  161.90   24.64
   0  29   2  242.10   25.12
   0  29  -2  263.90   28.73
   0  29  -2  217.10   21.98
   0 -29   3  386.40   39.04
   0 -29   3  385.10   34.08
   0 -29   3  388.80   39.41
   0 -29  -3  386.60   37.60
   0 -29  -3  350.90   32.63
   0  29   3  320.10   31.03
   0  29   3  315.70   35.10
   0  29  -3  403.30   36.09
   0  29  -3  368.50   35.54
   0 -29   4  127.30   28.09
   0 -29   4   98.47   14.74
   0 -29  -4   81.52   18.16
   0 -29  -4  111.90   19.43
   0  29   4   83.59   18.48
   0  29   4   76.76   25.10
   0  29  -4   70.71   18.78
   0  29  -4  102.90   16.84
   0 -29   5  807.80   73.63
   0 -29  -5  963.80   80.87
   0 -29  -5  734.40   62.59
   0  29   5  791.70   67.47
   0  29   5  753.90   68.50
   0  29  -5  818.00   71.19
   0  29  -5  934.10   78.08
   0 -29   6    5.10   28.64
   0 -29   6   -1.69   15.31
   0 -29  -6   11.11   19.08
   0 -29  -6   18.01   17.47
   0  29   6   -1.03   13.35
   0  29   6    0.31   27.08
   0  29  -6   -4.25   16.94
   0  29  -6   17.32   16.23
   0 -29   7   33.49   18.06
   0 -29   7   51.67   33.08
   0 -29  -7   22.78   15.81
   0 -29  -7   26.95   21.44
   0  29   7   38.58   19.44
   0  29   7   28.28   31.22
   0  29  -7  -20.60   18.36
   0  29  -7   17.76   25.31
   0 -29   8    0.81   34.49
   0 -29   8    7.80   17.06
   0 -29  -8    4.71   17.63
   0 -29  -8   11.89   23.45
   0  29   8   28.14   33.04
   0  29   8    2.97   23.99
   0  29  -8   -6.50   18.04
   0  29  -8   -1.04   21.59
   0 -29   9  573.00   51.92
   0 -29   9  461.40   57.09
   0 -29  -9  497.80   44.24
   0 -29  -9  622.40   56.57
   0  29   9  463.00   46.60
   0  29   9  414.10   49.22
   0  29  -9  513.70   48.20
   0  29  -9  535.50   50.48
   0 -29 -10   39.18   16.19
   0 -29 -10   47.63   23.95
   0  29  10   23.46   33.48
   0  29  10   15.51   32.00
   0  29 -10   51.13   23.25
   0  29 -10   17.90   27.95
   0 -29  11   -0.07   34.00
   0 -29  11  -29.53   28.90
   0 -29 -11   17.38   20.62
   0 -29 -11   38.30   31.88
   0  29  11  -15.30   29.38
   0  29  11  -25.68   39.58
   0  29 -11    7.66   27.43
   0  29 -11   30.20   31.10
   0 -29  12  -21.23   29.07
   0 -29  12    5.77   48.94
   0 -29 -12   19.66   31.69
   0 -29 -12    6.77   27.22
   0  29  12   -6.15   37.83
   0  29  12   32.86   40.10
   0  29 -12  -11.76   20.90
   0  29 -12  -23.93   33.38
   0 -30   0  813.60   70.86
   0 -30   0 1015.00   83.61
   0  30   0  857.50   73.40
   0  30   0  801.50   66.60
   0 -30   1   13.52   11.59
   0 -30   1    4.22   20.95
   0 -30  -1    8.61   13.96
   0 -30  -1    3.58   19.23
   0  30   1    8.38   10.93
   0  30   1    0.88   21.02
   0  30  -1  -10.82   17.05
   0  30  -1   15.25   12.66
   0 -30   2   23.24   22.25
   0 -30   2   23.80   10.77
   0 -30  -2    2.65   18.54
   0 -30  -2    3.70   14.15
   0  30   2    0.11   14.32
   0  30   2    0.03   20.40
   0  30  -2   17.64   12.17
   0  30  -2    6.72   17.87
   0 -30   3  158.10   18.13
   0 -30   3  124.40   24.47
   0 -30   3  128.80   23.88
   0 -30  -3  175.40   21.43
   0 -30  -3  186.20   25.83
   0  30   3  128.90   19.74
   0  30   3  150.00   26.28
   0  30  -3  143.40   18.52
   0  30  -3  138.30   22.58
   0 -30   4  652.60   61.07
   0 -30   4  675.90   56.99
   0 -30  -4  856.50   73.28
   0 -30  -4  803.30   68.15
   0  30   4  609.60   52.66
   0  30   4  502.80   49.80
   0  30  -4  707.00   60.23
   0  30  -4  583.60   52.46
   0 -30   5  -30.40   29.10
   0 -30   5   11.49   13.01
   0 -30  -5  -29.89   17.20
   0 -30  -5    2.15   15.97
   0  30   5  -40.05   28.63
   0  30   5    8.96   15.75
   0  30  -5   28.90   18.40
   0  30  -5    8.42   22.03
   0 -30   6   40.07   30.97
   0 -30   6   64.26   17.67
   0 -30  -6   52.19   17.96
   0 -30  -6   63.58   22.00
   0  30   6   78.51   21.83
   0  30   6   61.70   20.11
   0  30  -6   49.37   17.05
   0  30  -6   88.57   24.25
   0 -30   7   30.47   14.65
   0 -30   7   42.53   29.69
   0 -30  -7    3.94   16.16
   0 -30  -7   25.09   20.35
   0  30   7   19.47   21.44
   0  30   7   -8.99   28.39
   0  30  -7   22.19   23.71
   0  30  -7   18.33   18.57
   0 -30   8  398.80   39.59
   0 -30   8  415.30   48.57
   0 -30  -8  420.20   43.31
   0 -30  -8  483.70   42.48
   0  30   8  356.90   39.04
   0  30   8  401.50   48.01
   0  30  -8  486.90   49.13
   0  30  -8  432.00   41.52
   0 -30   9   28.59   20.82
   0 -30   9   21.29   38.39
   0 -30  -9    4.61   24.22
   0 -30  -9    5.15   18.94
   0  30   9  -37.16   35.41
   0  30   9   11.42   26.79
   0  30  -9   17.26   22.79
   0  30  -9   38.86   28.80
   0 -30  10  144.50   28.50
   0 -30  10  103.50   53.78
   0 -30 -10  127.20   25.89
   0 -30 -10  135.50   25.81
   0  30  10  101.80   33.64
   0  30  10   65.94   37.00
   0  30 -10  139.50   26.31
   0  30 -10  129.90   35.64
   0 -30  11   -5.27   20.40
   0 -30  11  134.00   46.39
   0 -30 -11   21.04   26.93
   0 -30 -11   34.54   34.26
   0  30  11   -2.85   39.76
   0  30  11   -1.26   40.49
   0  30 -11    3.00   19.30
   0  30 -11   -6.28   27.98
   0 -30  12    9.70   34.63
   0 -30  12    0.43   29.37
   0 -30 -12  -25.31   29.54
   0 -30 -12    6.32   23.34
   0  30  12    1.22   42.53
   0  30  12  -25.75   43.16
   0  30 -12   33.65   29.85
   0  30 -12   18.18   24.60
   0 -31   0    0.33   21.44
   0 -31   0   10.81   13.62
   0  31   0    1.63   12.68
   0  31   0   -9.20   20.22
   0 -31   1   46.58   22.72
   0 -31   1    6.75   12.95
   0 -31  -1    4.44   14.18
   0 -31  -1  -14.05   20.90
   0  31   1   18.41   14.35
   0  31   1   21.91   21.20
   0  31  -1   11.51   18.84
   0  31  -1   22.38   13.34
   0 -31   2 1303.00  108.80
   0 -31   2 1218.00   99.31
   0 -31  -2 1272.00  104.50
   0 -31  -2  980.10   83.15
   0  31   2 1137.00   93.63
   0  31   2 1091.00   92.51
   0  31  -2 1053.00   86.63
   0  31  -2 1085.00   90.95
   0 -31   3   20.90   24.26
   0 -31   3   22.55   13.15
   0 -31   3    4.92   28.34
   0 -31  -3   45.23   17.05
   0 -31  -3   50.67   20.28
   0  31   3    6.29   15.32
   0  31  -3   15.55   13.19
   0  31  -3    8.29   16.73
   0 -31   4  119.70   18.03
   0 -31   4  105.00   32.88
   0 -31  -4  168.90   22.27
   0 -31  -4  101.20   22.19
   0  31   4  169.50   22.03
   0  31   4  184.40   31.63
   0  31  -4  139.20   26.40
   0  31  -4  131.50   20.13
   0 -31   5   59.32   29.55
   0 -31   5   83.74   18.13
   0 -31  -5   61.24   18.84
   0 -31  -5  101.30   21.16
   0  31   5   89.08   19.02
   0  31   5  119.70   32.89
   0  31  -5  132.10   20.73
   0  31  -5  124.60   26.02
   0 -31   6  282.00   29.81
   0 -31   6  347.80   49.25
   0 -31  -6  301.50   30.48
   0 -31  -6  351.80   36.27
   0  31   6  293.50   32.23
   0  31   6  346.80   42.18
   0  31  -6  324.60   34.18
   0  31  -6  300.20   31.89
   0 -31   7   36.17   33.36
   0 -31   7   99.62   20.33
   0 -31  -7  113.90   17.85
   0 -31  -7  169.70   26.10
   0  31   7   95.27   23.47
   0  31   7   35.53   31.48
   0  31  -7  104.10   20.44
   0  31  -7  105.20   27.55
   0 -31   8  125.80   21.23
   0 -31   8  130.60   37.16
   0 -31  -8  152.60   27.01
   0 -31  -8  101.40   21.51
   0  31   8  119.90   21.10
   0  31   8  237.00   39.83
   0  31  -8  161.30   27.19
   0  31  -8  148.60   25.17
   0 -31   9   68.18   22.90
   0 -31   9   90.90   47.58
   0 -31  -9   20.33   25.72
   0 -31  -9   56.00   15.14
   0  31   9   91.93   38.41
   0  31   9   52.94   27.76
   0  31  -9   30.35   22.36
   0  31  -9   68.18   22.56
   0 -31  10   51.33   38.14
   0 -31  10   54.95   18.87
   0 -31 -10   59.07   29.77
   0 -31 -10   28.78   16.52
   0  31  10   34.99   37.38
   0  31  10   30.52   37.54
   0  31 -10   32.48   25.08
   0  31 -10   34.69   28.86
   0 -31  11   23.84   30.09
   0 -31  11  -18.21   32.26
   0 -31 -11   19.20   19.76
   0 -31 -11   51.22   35.92
   0  31  11    3.56   40.19
   0  31  11   -7.39   36.43
   0  31 -11   20.87   28.32
   0  31 -11  -16.62   34.16
   0 -32   0  606.50   56.40
   0 -32   0  685.60   58.40
   0  32   0  517.30   48.77
   0  32   0  565.70   48.49
   0 -32   1  520.00   45.42
   0 -32  -1  515.80   45.61
   0 -32  -1  581.30   53.81
   0  32   1  486.40   47.43
   0  32   1  521.10   45.58
   0  32  -1  449.40   40.06
   0  32  -1  428.20   41.76
   0 -32   2  118.90   25.45
   0 -32   2  123.70   16.70
   0 -32  -2  121.50   24.66
   0 -32  -2   68.02   17.03
   0  32   2   71.97   23.91
   0  32   2   87.03   17.75
   0  32   2   94.88   26.81
   0  32  -2  135.40   23.00
   0  32  -2  131.00   18.58
   0 -32   3  917.40   76.31
   0 -32   3 1197.00  102.30
   0 -32  -3  849.20   71.82
   0 -32  -3 1059.00   89.96
   0  32   3  750.70   63.86
   0  32   3  675.90   62.49
   0  32  -3  800.40   69.38
   0  32  -3  795.30   67.02
   0 -32   4    1.15   15.22
   0 -32   4   21.73   27.84
   0 -32  -4    4.30   20.17
   0 -32  -4    7.23   18.58
   0  32   4   16.23   29.88
   0  32   4   -0.73   17.69
   0  32  -4   -4.19   22.50
   0  32  -4   -1.03   17.75
   0 -32   5   28.98   31.89
   0 -32   5   21.51   13.10
   0 -32  -5   19.76   21.15
   0 -32  -5   43.94   17.53
   0  32   5   31.19   20.20
   0  32   5   20.59   31.30
   0  32  -5   46.69   23.25
   0  32  -5   51.31   19.93
   0 -32   6   23.82   18.18
   0 -32   6   -4.53   35.78
   0 -32  -6   37.65   20.44
   0 -32  -6    0.21   17.70
   0  32   6   12.06   31.13
   0  32   6   18.29   14.40
   0  32  -6   -8.70   23.36
   0  32  -6   22.54   17.36
   0 -32   7  538.50   61.99
   0 -32   7  562.90   49.36
   0 -32  -7  444.10   41.10
   0  32   7  541.60   48.39
   0  32   7  432.90   49.31
   0  32  -7  628.60   55.75
   0  32  -7  499.50   49.06
   0 -32   8   32.33   35.59
   0 -32   8   41.70   21.77
   0 -32  -8   36.90   18.29
   0 -32  -8   66.21   25.83
   0  32   8   58.77   33.78
   0  32   8   66.40   26.54
   0  32  -8   36.15   20.35
   0  32  -8   58.33   28.22
   0 -32   9   -5.67   23.33
   0 -32   9   64.41   34.79
   0 -32  -9   -9.91   25.31
   0 -32  -9   21.70   20.95
   0  32   9   -4.60   20.85
   0  32   9   34.53   36.96
   0 -32  10   70.35   27.47
   0 -32  10  -16.33   49.94
   0 -32 -10  -10.07   30.66
   0 -32 -10   42.43   22.32
   0  32  10   60.20   31.22
   0  32  10   22.47   39.08
   0  32 -10   60.02   32.46
   0  32 -10   19.58   19.99
   0 -32  11  103.80   23.89
   0 -32  11   22.40   42.00
   0 -32 -11   94.76   29.56
   0 -32 -11   61.64   34.92
   0  32  11   73.15   31.06
   0  32  11   97.17   29.37
   0  32 -11   73.98   26.17
   0  32 -11  100.90   24.30
   0 -33   0   16.54   15.22
   0 -33   0  -23.23   23.75
   0  33   0    1.04   22.75
   0  33   0   -3.69   14.17
   0 -33   1 1075.00   96.94
   0 -33   1 1026.00   84.93
   0 -33  -1 1154.00   95.68
   0 -33  -1 1130.00   96.58
   0  33   1 1032.00   89.07
   0  33  -1  986.30   83.81
   0  33  -1  949.50   78.77
   0 -33   2  160.80   31.69
   0 -33   2  174.00   20.92
   0 -33  -2  153.70   23.22
   0 -33  -2   77.91   25.19
   0  33   2  176.70   23.52
   0  33   2  115.60   29.40
   0  33   2  113.50   27.10
   0  33  -2  156.00   24.29
   0  33  -2  208.30   23.68
   0 -33   3   25.23   25.54
   0 -33   3   16.89   16.05
   0 -33  -3   13.04   22.29
   0 -33  -3   12.23   18.32
   0  33   3  -16.09   30.21
   0  33   3   -6.53   16.64
   0  33  -3    1.27   14.33
   0  33  -3    4.03   22.95
   0 -33   4   -4.47   15.32
   0 -33   4    4.47   31.90
   0 -33   4  -22.98   31.80
   0 -33  -4   -0.50   20.57
   0 -33  -4    7.74   22.09
   0  33   4   -5.03   34.30
   0  33   4   19.97   18.01
   0  33  -4   29.10   23.44
   0  33  -4   -8.72   16.37
   0 -33   5  409.20   37.75
   0 -33   5  309.20   42.39
   0 -33  -5  430.90   40.68
   0 -33  -5  437.50   41.12
   0  33   5  342.50   44.19
   0  33   5  446.10   42.76
   0  33  -5  321.10   36.27
   0  33  -5  371.80   36.33
   0 -33   6   81.38   19.90
   0 -33   6   51.27   34.94
   0 -33  -6  164.30   26.52
   0 -33  -6  119.60   21.34
   0  33   6   66.37   21.60
   0  33   6   40.31   34.46
   0  33  -6   90.85   24.78
   0  33  -6  107.70   21.49
   0 -33   7    3.34   35.15
   0 -33   7   12.56   19.43
   0 -33  -7    4.10   17.70
   0 -33  -7   25.18   24.22
   0  33   7    4.26   21.94
   0  33   7    2.50   31.70
   0  33  -7   -1.76   19.30
   0  33  -7   11.53   26.67
   0 -33   8   62.55   40.40
   0 -33   8   68.74   19.39
   0 -33  -8   65.58   26.99
   0 -33  -8   35.49   18.01
   0  33   8   26.27   32.91
   0  33   8   54.13   26.38
   0  33  -8   76.77   23.34
   0  33  -8   29.51   25.22
   0 -33   9  183.80   27.94
   0 -33   9  121.50   47.39
   0 -33  -9  119.10   22.09
   0 -33  -9  173.30   30.84
   0  33   9  122.90   34.12
   0  33   9  201.90   36.97
   0  33  -9  147.50   27.10
   0  33  -9  160.70   30.74
   0 -33  10   17.29   45.14
   0 -33  10   20.52   21.33
   0 -33 -10  -17.30   24.09
   0 -33 -10   22.45   31.03
   0  33  10   53.63   34.87
   0  33  10   -2.36   35.09
   0  33 -10   31.07   24.83
   0  33 -10   59.63   26.85
   0 -33  11  -27.79   42.96
   0 -33  11   35.84   29.52
   0 -33 -11   42.44   28.67
   0 -33 -11   55.00   26.87
   0  33  11  -38.02   45.42
   0  33  11  -24.57   30.82
   0  33 -11  -23.55   36.28
   0  33 -11    5.02   31.13
   0 -34   0  346.80   40.60
   0 -34   0  421.80   39.82
   0  34   0  315.60   38.91
   0  34   0  356.20   33.80
   0 -34   1   24.91   33.80
   0 -34   1   15.88   17.14
   0 -34  -1   30.27   26.52
   0 -34  -1   13.76   19.27
   0  34   1   11.90   15.54
   0  34  -1   -3.44   32.61
   0  34  -1  -26.27   14.88
   0 -34   2   47.59   16.98
   0 -34   2   36.06   34.73
   0 -34  -2   23.57   18.17
   0 -34  -2   87.41   25.84
   0  34   2   14.51   33.13
   0  34   2   43.77   16.34
   0  34   2   10.95   32.84
   0  34  -2    7.10   15.07
   0  34  -2   50.22   25.29
   0 -34   3   48.31   31.70
   0 -34   3   -9.12   16.62
   0 -34  -3   32.21   18.28
   0 -34  -3    6.71   21.94
   0  34   3   24.43   17.24
   0  34   3   17.40   28.53
   0  34  -3   19.09   24.30
   0  34  -3   -3.32   15.36
   0 -34   4  873.50   82.80
   0 -34   4  861.30   80.31
   0 -34   4  819.70   69.58
   0 -34  -4  718.80   62.35
   0 -34  -4  697.90   64.20
   0  34   4  876.40   79.56
   0  34   4  813.90   69.42
   0  34  -4  675.40   61.49
   0  34  -4  832.00   70.41
   0 -34   5   19.66   16.43
   0 -34   5  -47.78   34.02
   0 -34  -5   -1.12   19.85
   0 -34  -5   -2.87   19.52
   0  34   5   -3.57   37.79
   0  34   5   -6.43   19.36
   0  34  -5  -17.27   22.95
   0  34  -5    6.74   20.42
   0 -34   6  180.10   42.16
   0 -34   6  175.00   24.55
   0 -34  -6  170.00   26.75
   0 -34  -6  181.00   23.21
   0  34   6  205.90   40.87
   0  34   6  186.50   27.02
   0  34  -6  155.90   27.72
   0  34  -6  184.90   25.66
   0 -34   7  -10.71   39.42
   0 -34   7   -6.87   17.17
   0 -34  -7    5.84   13.80
   0 -34  -7  -20.81   23.87
   0  34   7   18.52   35.71
   0  34   7   18.77   23.66
   0  34  -7  -13.91   26.93
   0  34  -7   -8.34   22.20
   0 -34   8   14.21   23.25
   0 -34   8   59.05   43.15
   0 -34  -8   52.23   26.88
   0 -34  -8   71.15   21.92
   0  34   8   87.55   21.99
   0  34   8   34.85   33.79
   0  34  -8   39.55   23.38
   0  34  -8   40.25   29.84
   0 -34   9  -26.05   20.97
   0 -34   9   64.91   41.58
   0 -34  -9  -13.29   15.54
   0 -34  -9  -10.73   25.16
   0  34   9    2.98   33.43
   0  34   9   13.91   32.06
   0  34  -9   11.08   24.96
   0  34  -9    1.77   30.94
   0 -34  10  123.90   28.05
   0 -34  10   55.94   43.42
   0 -34 -10   43.63   32.06
   0 -34 -10   88.50   19.79
   0  34  10   64.81   38.88
   0  34  10   45.86   27.60
   0  34 -10   92.24   34.63
   0  34 -10   71.18   20.83
   0 -34  11    4.86   30.08
   0 -34  11    3.67   28.52
   0 -34 -11   19.35   22.54
   0 -34 -11   11.21   26.99
   0  34  11   26.92   36.70
   0  34  11   16.07   41.56
   0  34 -11   -3.48   24.68
   0  34 -11  -10.43   32.95
   0 -35   0   34.48   27.74
   0 -35   0  -13.08   18.35
   0  35   0    1.99   16.16
   0  35   0  -27.33   31.04
   0 -35   1    4.66   18.26
   0 -35   1   -8.21   36.80
   0 -35  -1   37.28   20.16
   0 -35  -1    3.78   28.72
   0  35   1   32.29   17.31
   0  35   1   -0.58   33.07
   0  35  -1   27.69   34.36
   0  35  -1   16.63   14.96
   0 -35   2  555.10   59.08
   0 -35   2  469.60   43.37
   0 -35  -2  551.80   50.03
   0 -35  -2  514.00   50.26
   0  35   2  531.70   55.74
   0  35   2  447.10   40.92
   0  35   2  468.00   52.17
   0  35  -2  619.90   53.94
   0  35  -2  506.50   49.81
   0 -35   3  268.10   37.63
   0 -35   3  279.00   29.84
   0 -35  -3  247.20   32.32
   0 -35  -3  247.90   29.09
   0  35   3  225.60   36.44
   0  35   3  240.10   27.62
   0  35  -3  217.00   31.87
   0  35  -3  234.50   26.26
   0 -35   4  -23.64   29.40
   0 -35   4   19.89   29.18
   0 -35   4   -0.47   15.66
   0 -35  -4   -5.74   26.45
   0 -35  -4   23.17   22.68
   0  35   4   44.27   30.77
   0  35   4   25.53   19.61
   0  35  -4    9.94   17.85
   0  35  -4   22.04   25.35
   0 -35   5  112.20   20.03
   0 -35   5   45.06   32.54
   0 -35  -5  121.40   24.06
   0 -35  -5  105.80   23.04
   0  35   5  134.20   21.53
   0  35   5  110.10   41.90
   0  35  -5  162.20   23.89
   0  35  -5  141.30   31.74
   0 -35   6   56.52   36.45
   0 -35   6  139.50   23.65
   0 -35  -6  103.80   22.25
   0 -35  -6  165.40   23.54
   0  35   6  134.50   25.19
   0  35   6  121.70   38.26
   0  35  -6  166.80   27.33
   0  35  -6  142.10   29.04
   0 -35   7   -2.03   36.82
   0 -35   7   -8.34   20.18
   0 -35  -7   19.14   22.59
   0 -35  -7   17.98   21.39
   0  35   7   30.12   22.55
   0  35   7   21.83   36.44
   0  35  -7   16.08   27.08
   0  35  -7    1.11   20.63
   0 -35   8  252.00   31.61
   0 -35   8  341.10   53.72
   0 -35  -8  294.90   37.39
   0  35   8  204.10   32.95
   0  35   8  254.80   45.44
   0  35  -8  304.10   38.71
   0  35  -8  186.50   29.22
   0 -35   9   81.01   43.89
   0 -35   9   32.54   24.24
   0 -35  -9   66.32   28.59
   0 -35  -9   38.31   22.84
   0  35   9   29.00   36.26
   0  35   9   37.67   27.98
   0  35  -9   31.55   23.97
   0  35  -9   27.86   32.24
   0 -35  10  -42.06   42.98
   0 -35  10   22.84   26.62
   0 -35 -10   23.12   25.51
   0 -35 -10   42.42   24.17
   0  35  10  -30.81   35.05
   0  35  10   56.07   33.12
   0  35 -10   25.11   26.99
   0  35 -10   12.49   26.06
   0 -35  11  -58.42   40.17
   0 -35  11   18.66   24.11
   0 -35 -11   -9.23   28.27
   0 -35 -11   34.96   32.25
   0  35  11  -25.48   40.16
   0  35  11  -14.21   31.56
   0  35 -11  -10.04   29.37
   0  35 -11   17.21   25.44
   0 -36   0    1.46   23.40
   0 -36   0   17.36   27.45
   0  36   0    7.35   28.39
   0  36   0    8.29   16.09
   0 -36   1  271.40   30.64
   0 -36   1  266.80   41.31
   0 -36  -1  295.00   37.26
   0 -36  -1  326.60   35.02
   0  36   1  288.70   40.25
   0  36   1  309.10   30.94
   0  36  -1  218.70   24.68
   0  36  -1  241.30   40.85
   0 -36   2   84.66   18.11
   0 -36   2   78.25   47.90
   0 -36  -2   96.46   25.64
   0 -36  -2   59.37   20.40
   0  36   2  108.50   20.04
   0  36   2   68.75   33.29
   0  36   2  106.80   31.79
   0  36  -2   97.21   26.68
   0  36  -2   85.16   17.94
   0 -36   3  460.80   50.79
   0 -36   3  450.60   42.07
   0 -36  -3  577.00   54.79
   0 -36  -3  518.50   47.79
   0  36   3  404.90   39.80
   0  36   3  472.40   50.96
   0  36  -3  403.60   43.78
   0  36  -3  411.80   37.63
   0 -36   4  -43.71   31.12
   0 -36   4    7.60   16.13
   0 -36  -4  -26.14   26.80
   0 -36  -4    5.42   21.62
   0  36   4    8.68   32.06
   0  36   4  -24.55   19.97
   0  36  -4   -0.98   16.86
   0  36  -4    8.40   25.78
   0 -36   5   14.23   17.12
   0 -36   5   14.63   34.46
   0 -36   5   48.72   30.89
   0 -36  -5   24.93   21.67
   0 -36  -5    3.72   21.00
   0  36   5   29.61   15.43
   0  36   5  -12.98   36.06
   0  36  -5   12.34   18.77
   0  36  -5   10.87   26.40
   0 -36   6   55.78   36.23
   0 -36   6   17.55   20.23
   0 -36  -6   48.39   22.97
   0 -36  -6   18.14   20.96
   0  36   6   22.78   20.71
   0  36   6  103.30   39.43
   0  36  -6    3.48   24.75
   0  36  -6   52.48   21.61
   0 -36   7  695.20   73.94
   0 -36  -7  451.20   45.24
   0 -36  -7  542.30   50.43
   0  36   7  424.10   51.08
   0  36   7  513.80   47.92
   0  36  -7  449.80   49.53
   0  36  -7  480.60   47.30
   0 -36   8   17.71   17.85
   0 -36   8  -15.79   43.97
   0 -36  -8  -30.09   24.75
   0 -36  -8    8.10   17.05
   0  36   8   35.92   30.10
   0  36   8  -10.73   40.15
   0  36  -8    0.83   27.16
   0  36  -8   -7.89   25.80
   0 -36   9  -14.64   41.82
   0 -36   9  -10.34   22.38
   0 -36  -9  -15.44   31.70
   0 -36  -9    2.71   24.75
   0  36   9   -6.89   33.37
   0  36   9    2.09   35.01
   0  36  -9   -3.63   24.97
   0  36  -9   31.58   25.43
   0 -36  10    2.55   20.02
   0 -36  10   17.28   32.32
   0 -36 -10   -0.06   27.86
   0 -36 -10   15.27   27.13
   0  36  10  -28.68   37.91
   0  36  10    6.86   36.26
   0  36 -10  -20.13   27.69
   0  36 -10    9.32   29.51
   0 -37   0  -13.33   18.92
   0 -37   0   23.25   30.99
   0  37   0   44.31   18.03
   0  37   0  -13.55   28.64
   0 -37   1  343.60   34.87
   0 -37   1  212.60   40.66
   0 -37  -1  239.40   35.15
   0 -37  -1  253.90   29.83
   0  37   1  261.20   28.56
   0  37   1  215.40   35.83
   0  37  -1  300.90   31.18
   0  37  -1  288.10   38.32
   0 -37   2  184.50   51.27
   0 -37   2  202.40   24.81
   0 -37  -2  166.60   26.01
   0 -37  -2  127.70   29.52
   0  37   2  245.00   38.01
   0  37   2  217.20   26.52
   0  37  -2  182.90   22.83
   0  37  -2  188.50   30.80
   0 -37   3   75.12   19.25
   0 -37   3  104.90   31.34
   0 -37  -3   59.54   26.60
   0 -37  -3   94.89   23.95
   0  37   3  103.70   34.02
   0  37   3   61.09   21.90
   0  37  -3   94.91   26.95
   0  37  -3   73.60   17.79
   0 -37   4   95.86   19.22
   0 -37   4   39.25   35.31
   0 -37  -4   55.54   29.11
   0 -37  -4   45.58   22.80
   0  37   4   52.64   34.16
   0  37   4   49.44   21.16
   0  37  -4   99.33   20.90
   0  37  -4   44.58   28.68
   0 -37   5  240.10   38.87
   0 -37   5  283.30   29.63
   0 -37   5  270.30   39.86
   0 -37  -5  279.00   34.56
   0 -37  -5  252.00   31.82
   0  37   5  247.50   42.18
   0  37   5  301.70   31.96
   0  37  -5  305.80   33.15
   0  37  -5  317.60   40.01
   0 -37   6  220.20   45.84
   0 -37   6  240.20   29.41
   0 -37  -6  164.20   27.38
   0 -37  -6  241.00   31.76
   0  37   6  197.60   45.65
   0  37   6  232.90   28.96
   0  37  -6  208.60   30.12
   0  37  -6  238.00   32.54
   0 -37   7   44.88   20.44
   0 -37   7   -1.93   42.90
   0 -37  -7    3.61   21.67
   0 -37  -7   42.10   26.06
   0  37   7   22.34   24.66
   0  37   7   58.93   42.38
   0  37  -7    9.41   24.19
   0  37  -7   30.57   30.36
   0 -37   8  113.00   25.28
   0 -37   8   43.33   42.48
   0 -37  -8   44.41   18.65
   0 -37  -8   40.28   27.14
   0  37   8   95.54   39.83
   0  37   8   86.01   32.97
   0  37  -8   16.61   30.76
   0  37  -8   53.22   25.69
   0 -37   9   77.37   25.42
   0 -37   9   63.18   43.12
   0 -37  -9   98.02   22.87
   0 -37  -9   33.79   31.40
   0  37   9   52.03   37.24
   0  37   9   53.71   32.64
   0  37  -9   42.56   32.72
   0  37  -9   29.41   24.79
   0 -37  10   30.28   30.00
   0 -37  10   -9.11   37.13
   0 -37 -10   44.34   33.74
   0 -37 -10   49.99   24.28
   0  37  10   19.35   36.80
   0  37  10    3.56   42.15
   0  37 -10   49.51   29.26
   0  37 -10    5.48   36.38
   0  38   0  433.60   41.14
   0  38   0  362.90   48.95
   0 -38   1  117.20   22.60
   0 -38   1  137.10   37.38
   0 -38  -1   80.46   30.94
   0 -38  -1   90.74   22.41
   0  38   1   63.25   32.04
   0  38   1   96.38   21.63
   0  38  -1   52.73   19.13
   0  38  -1  122.20   34.66
   0 -38   2   45.41   19.07
   0 -38   2   28.90   50.40
   0 -38  -2   19.52   28.14
   0 -38  -2   31.92   22.28
   0  38   2   47.06   18.63
   0  38   2   40.64   33.36
   0  38  -2   18.20   28.38
   0  38  -2   50.64   17.30
   0 -38   3    2.03   31.18
   0 -38   3   13.08   18.33
   0 -38  -3   19.52   23.69
   0 -38  -3    7.21   26.32
   0  38   3   42.69   21.32
   0  38   3   15.27   32.82
   0  38   3   -7.91   35.70
   0  38  -3   24.63   16.61
   0  38  -3   -1.25   28.23
   0 -38   4  468.70   44.10
   0 -38   4  466.30   51.97
   0 -38  -4  368.60   44.24
   0 -38  -4  544.00   51.19
   0  38   4  439.90   52.66
   0  38  -4  458.70   49.31
   0  38  -4  472.10   43.67
   0 -38   5   -3.93   32.09
   0 -38   5   -4.46   17.16
   0 -38   5   -5.99   33.20
   0 -38  -5   28.25   24.10
   0 -38  -5  -18.65   24.20
   0  38   5   23.73   35.81
   0  38   5  -11.72   18.39
   0  38  -5  -10.59   19.19
   0  38  -5    6.12   26.29
   0 -38   6   54.22   38.14
   0 -38   6  107.80   22.08
   0 -38  -6  157.80   29.14
   0 -38  -6   96.24   25.88
   0  38   6   63.42   23.02
   0  38   6  135.30   39.82
   0  38  -6  133.70   32.07
   0  38  -6   93.77   23.84
   0 -38   7   49.10   45.30
   0 -38   7  -10.88   20.12
   0 -38  -7  -11.48   20.72
   0 -38  -7   21.00   26.56
   0  38   7  -10.97   38.57
   0  38   7   -9.96   28.67
   0  38  -7  -14.77   30.43
   0  38  -7   32.01   24.42
   0 -38   8   53.61   24.27
   0 -38   8   39.43   42.39
   0 -38  -8   82.96   22.56
   0 -38  -8   28.99   28.69
   0  38   8   83.13   24.47
   0  38   8   38.08   36.99
   0  38  -8   71.18   31.18
   0  38  -8   39.17   26.88
   0 -38   9   26.87   25.52
   0 -38   9   36.08   43.70
   0 -38  -9  -21.95   18.69
   0 -38  -9  -44.87   31.43
   0  38   9   48.97   38.65
   0  38   9   47.45   32.05
   0  38  -9   -1.94   28.19
   0  38  -9   29.13   33.51
   0 -38  10   23.92   30.25
   0 -38  10   61.56   36.88
   0 -38 -10   82.53   35.84
   0 -38 -10   44.25   22.04
   0  38  10   40.14   45.31
   0  38  10   58.80   41.29
   0  38 -10   40.44   32.78
   0  38 -10   50.30   31.32
   0 -39   0    0.33   35.39
   0 -39   0  -11.07   22.47
   0  39   0   -9.27   18.02
   0  39   0    2.19   39.00
   0 -39   1  185.80   26.44
   0 -39   1  275.50   43.92
   0 -39  -1  245.00   31.45
   0 -39  -1  247.90   40.17
   0  39   1  377.20   51.62
   0  39   1  272.90   30.15
   0  39  -1  310.30   41.85
   0  39  -1  251.90   28.44
   0 -39   2  233.20   27.69
   0 -39   2  181.40   53.18
   0 -39  -2  205.60   29.36
   0 -39  -2  291.80   36.60
   0  39   2  253.50   48.29
   0  39   2  259.90   29.26
   0  39  -2  169.00   31.38
   0  39  -2  288.00   30.15
   0 -39   3   23.31   18.46
   0 -39   3    2.30   33.01
   0 -39  -3  -51.56   26.94
   0 -39  -3  -12.72   24.65
   0  39   3  -13.91   34.52
   0  39   3    1.43   21.68
   0  39   3  -32.03   37.36
   0  39  -3  -19.22   18.31
   0  39  -3   -9.83   26.03
   0 -39   4   60.26   33.10
   0 -39   4   42.61   19.87
   0 -39  -4   30.87   23.81
   0 -39  -4   36.72   28.04
   0  39   4   36.36   23.56
   0  39   4   13.98   40.01
   0  39  -4    8.92   17.94
   0  39  -4   87.17   30.42
   0 -39   5  117.90   43.08
   0 -39   5   82.70   20.55
   0 -39   5  162.10   40.45
   0 -39  -5  147.70   28.45
   0 -39  -5  128.60   28.82
   0  39   5  114.80   37.09
   0  39   5  143.60   23.36
   0  39  -5  107.70   23.00
   0  39  -5  125.60   29.61
   0 -39   6  168.40   43.01
   0 -39   6  117.00   23.09
   0 -39   6  110.40   40.57
   0 -39  -6  136.70   27.87
   0 -39  -6  158.70   28.91
   0  39   6   89.70   43.76
   0  39   6   64.29   24.51
   0  39  -6   44.86   30.54
   0  39  -6   86.20   22.50
   0 -39   7   -9.60   39.35
   0 -39   7   -6.64   21.99
   0 -39  -7   -4.31   27.67
   0 -39  -7  -15.75   19.87
   0  39   7   55.54   40.43
   0  39   7    5.45   29.77
   0  39  -7   -2.20   26.84
   0  39  -7  -22.06   31.36
   0 -39   8   83.07   44.31
   0 -39   8  146.40   25.27
   0 -39  -8  131.80   27.11
   0 -39  -8  155.90   33.87
   0  39   8  155.30   28.11
   0  39   8   97.61   40.56
   0  39  -8  125.70   29.03
   0  39  -8  149.00   32.71
   0 -39   9   40.86   43.05
   0 -39   9   -0.42   23.84
   0 -39  -9   11.95   24.68
   0 -39  -9   46.11   30.89
   0  39   9   14.93   34.14
   0  39   9    4.61   38.46
   0  39  -9    7.94   29.46
   0  39  -9  -15.43   28.36
   0 -39  10  -20.49   36.99
   0 -39  10   14.13   23.54
   0 -39 -10   28.46   27.32
   0 -39 -10   -6.23   36.29
   0  39  10  -20.53   42.85
   0  39  10  -26.58   38.50
   0  39 -10   24.66   24.95
   0  39 -10   -1.05   26.20
   0 -40   0   14.48   22.16
   0 -40   0  -19.69   32.07
   0  40   0    2.23   18.27
   0  40   0   -8.20   36.75
   0 -40   1   61.82   24.23
   0 -40   1   38.20   34.79
   0 -40  -1  101.60   32.20
   0 -40  -1  117.70   25.80
   0  40   1  129.10   44.24
   0  40   1   66.56   20.60
   0  40  -1   65.04   19.77
   0  40  -1  124.00   37.39
   0 -40   2   10.80   51.52
   0 -40   2   11.19   18.09
   0 -40  -2  -11.02   22.68
   0 -40  -2   -8.26   27.55
   0  40   2   33.73   45.88
   0  40   2    2.20   21.65
   0  40  -2   25.33   18.55
   0  40  -2   31.70   28.72
   0 -40   3  310.50   33.18
   0 -40   3  398.80   52.43
   0 -40  -3  467.70   46.91
   0  40   3  407.00   42.06
   0  40   3  299.20   44.40
   0  40   3  352.20   49.76
   0  40  -3  333.50   40.06
   0  40  -3  386.90   37.79
   0 -40   4    7.31   18.03
   0 -40   4   33.11   35.05
   0 -40  -4  -16.09   25.17
   0 -40  -4  -40.61   28.88
   0  40   4   -5.67   24.49
   0  40   4  -27.60   40.36
   0  40  -4  -24.97   29.38
   0  40  -4    4.73   19.45
   0 -40   5   61.20   20.19
   0 -40   5  130.40   50.52
   0 -40  -5   71.55   27.38
   0 -40  -5  112.10   27.91
   0  40   5   45.78   20.94
   0  40   5   59.90   39.06
   0 -40   6  -36.50   51.93
   0 -40   6   -7.63   45.74
   0 -40   6   -2.64   19.93
   0 -40  -6   -9.16   28.24
   0 -40  -6  -15.98   27.26
   0  40   6   -0.19   37.97
   0  40   6   19.34   24.57
   0  40  -6   -2.43   23.82
   0  40  -6   -0.05   30.87
   0 -40   7  190.30   28.97
   0 -40   7  203.90   45.13
   0 -40  -7  169.90   31.06
   0 -40  -7  179.50   23.47
   0  40   7  150.10   34.74
   0  40   7  205.00   46.87
   0  40  -7  135.50   32.38
   0  40  -7  151.30   27.76
   0 -40   8   14.66   47.68
   0 -40   8   30.99   22.09
   0 -40  -8   14.86   31.05
   0 -40  -8   28.91   25.65
   0  40   8   31.45   31.02
   0  40   8   12.91   38.46
   0  40  -8   32.96   27.66
   0  40  -8   14.76   29.54
   0 -40   9   16.45   19.07
   0 -40   9   16.80   38.00
   0 -40  -9  -10.32   29.38
   0 -40  -9   51.22   31.05
   0  40   9   18.19   27.32
   0  40   9  -17.71   39.01
   0  40  -9   24.49   26.18
   0  40  -9   35.49   29.54
   0 -41   0    3.28   35.88
   0 -41   0  -10.07   26.10
   0  41   0   19.18   19.28
   0  41   0   -9.73   44.39
   0 -41   1  230.60   29.48
   0 -41   1  350.10   47.46
   0 -41  -1  360.10   45.76
   0 -41  -1  279.50   35.93
   0  41   1  286.30   47.79
   0  41   1  246.10   29.18
   0  41  -1  228.60   39.79
   0  41  -1  259.70   30.57
   0 -41   2  183.20   27.03
   0 -41   2  207.40   51.15
   0 -41  -2  224.20   31.71
   0 -41  -2  168.60   34.05
   0  41   2  170.10   45.40
   0  41   2  167.30   25.31
   0  41  -2  162.20   23.84
   0  41  -2  137.80   34.43
   0 -41   3   22.95   36.98
   0 -41   3   82.71   21.86
   0 -41  -3   61.24   27.50
   0 -41  -3   86.50   30.14
   0  41   3   54.83   46.12
   0  41   3   32.82   24.48
   0  41   3   69.11   35.94
   0  41  -3   28.77   26.90
   0  41  -3   47.51   19.92
   0 -41   4  120.80   39.87
   0 -41  -4  103.50   27.30
   0 -41  -4  108.60   32.14
   0  41   4   90.42   32.67
   0  41   4  147.20   25.17
   0  41  -4   91.32   33.59
   0  41  -4  113.30   23.12
   0 -41   5  253.20   45.90
   0 -41   5  300.10   32.71
   0 -41  -5  253.20   34.62
   0 -41  -5  191.00   31.80
   0  41   5  200.30   45.78
   0  41   5  240.00   28.12
   0  41  -5  239.70   29.99
   0  41  -5  183.40   31.27
   0 -41   6   72.96   40.12
   0 -41   6  130.20   24.14
   0 -41   6  137.80   42.76
   0 -41  -6  145.80   32.68
   0 -41  -6  157.40   31.37
   0  41   6   61.22   26.56
   0  41   6   83.15   38.40
   0  41  -6   95.22   34.23
   0  41  -6   79.56   24.49
   0 -41   7   -3.73   39.57
   0 -41   7   32.64   22.70
   0 -41  -7   23.77   22.11
   0 -41  -7   30.91   29.79
   0  41   7   11.72   43.30
   0  41   7   21.05   32.49
   0  41  -7   43.64   29.73
   0  41  -7   39.28   24.56
   0 -41   8   49.83   25.36
   0 -41   8   65.44   39.69
   0 -41  -8   29.94   26.92
   0 -41  -8   32.01   32.67
   0  41   8   -2.42   38.98
   0  41   8   -3.51   35.10
   0  41  -8   -2.63   32.10
   0  41  -8   31.67   31.28
   0 -41   9   26.81   36.49
   0 -41   9   58.55   24.63
   0 -41  -9  111.40   35.10
   0 -41  -9   56.17   30.76
   0  41   9   76.71   45.41
   0  41   9   62.03   29.62
   0  41  -9   62.68   32.76
   0  41  -9   72.95   34.38
   0 -42   0  396.40   40.08
   0 -42   0  413.30   52.39
   0  42   0  274.70   31.32
   0  42   0  426.10   50.59
   0 -42   1    7.31   23.14
   0 -42   1   -4.34   34.08
   0 -42  -1    4.52   31.41
   0 -42  -1    8.48   23.77
   0  42   1  -10.29   37.99
   0  42   1  -14.36   22.16
   0  42  -1   -1.30   37.33
   0  42  -1    8.59   23.20
   0 -42   2   28.64   20.46
   0 -42   2    5.13   43.91
   0 -42  -2   13.55   24.79
   0 -42  -2    1.38   29.57
   0  42   2  -74.81   42.03
   0  42   2   15.09   21.90
   0  42  -2   31.65   30.72
   0  42  -2   23.26   19.86
   0 -42  -3  -10.35   26.69
   0 -42  -3  -11.35   31.11
   0  42   3   21.25   44.16
   0  42   3   -2.09   30.35
   0  42  -3  -27.24   28.99
   0  42  -3    2.17   19.94
   0 -42   4  445.60   55.50
   0 -42   4  451.00   43.38
   0 -42  -4  662.00   60.60
   0 -42  -4  499.40   52.02
   0  42   4  517.10   57.20
   0  42   4  507.50   50.50
   0  42   4  509.80   60.44
   0  42  -4  380.70   46.04
   0  42  -4  491.20   46.69
   0 -42   5   60.85   37.90
   0 -42   5   -9.60   19.60
   0 -42  -5    9.12   25.91
   0 -42  -5   -3.92   27.00
   0  42   5    3.04   37.04
   0  42   5  -30.03   22.43
   0  42  -5   22.76   27.07
   0  42  -5   37.23   21.91
   0 -42   6   50.14   21.47
   0 -42   6  144.30   49.61
   0 -42   6  101.70   40.44
   0 -42  -6   99.51   31.38
   0 -42  -6   37.54   28.90
   0  42   6  122.60   42.44
   0  42   6    4.13   23.90
   0  42  -6   56.06   23.27
   0  42  -6   59.34   33.00
   0 -42   7    4.44   19.62
   0 -42   7    6.47   43.21
   0 -42   7   17.35   39.71
   0 -42  -7  -29.08   32.93
   0 -42  -7   15.88   24.57
   0  42   7   15.73   33.95
   0  42   7   -5.11   45.75
   0  42  -7  -28.18   26.18
   0  42  -7  -12.04   28.16
   0 -42   8  112.50   27.34
   0 -42   8   55.79   40.20
   0 -42  -8   82.74   32.64
   0 -42  -8  181.70   31.33
   0  42   8   99.53   38.33
   0  42   8  114.00   41.71
   0  42  -8   60.21   33.78
   0  42  -8  157.50   31.01
   0 -42   9   -2.96   26.51
   0 -42   9    3.22   39.59
   0 -42  -9   20.48   33.53
   0 -42  -9   48.40   35.77
   0  42   9  -25.27   42.80
   0  42   9  147.10   54.28
   0  42  -9  -28.03   35.95
   0  42  -9    9.62   32.58
   0 -43   0  -49.11   33.71
   0 -43   0  -22.12   23.71
   0  43   0   -2.27   22.23
   0  43   0   10.43   41.34
   0 -43   1  344.60   41.92
   0 -43   1  420.00   42.63
   0 -43  -1  400.70   42.27
   0 -43  -1  274.90   40.73
   0  43   1  339.20   37.07
   0  43   1  467.00   54.23
   0  43  -1  393.80   48.95
   0  43  -1  436.80   44.40
   0 -43   2  153.80   27.97
   0 -43  -2  189.20   38.19
   0 -43  -2  198.20   31.34
   0  43   2  133.30   42.37
   0  43   2  108.00   28.66
   0  43  -2  200.50   37.30
   0  43  -2  139.80   24.02
   0 -43   3    7.38   42.32
   0 -43   3   16.38   20.98
   0 -43  -3   43.88   26.42
   0 -43  -3   38.14   32.38
   0  43   3   10.36   25.40
   0  43   3   73.51   44.03
   0  43  -3   26.97   20.97
   0  43  -3   26.33   27.05
   0 -43   4   13.76   41.07
   0 -43   4   61.58   20.95
   0 -43  -4   74.99   26.09
   0 -43  -4   -9.57   30.95
   0  43   4   36.87   44.94
   0  43   4   26.94   42.50
   0  43   4   40.21   27.80
   0  43  -4   63.90   23.33
   0  43  -4   26.62   28.93
   0 -43   5   96.27   22.37
   0 -43   5  114.20   41.90
   0 -43  -5  102.80   28.25
   0 -43  -5   41.07   28.81
   0  43   5   83.01   26.72
   0  43   5  117.60   40.53
   0  43  -5   57.02   29.28
   0  43  -5   56.69   24.39
   0 -43   6  218.50   58.62
   0 -43   6   85.62   22.61
   0 -43  -6  108.00   30.79
   0 -43  -6   89.22   32.18
   0  43   6   32.76   45.04
   0  43   6   43.32   24.64
   0  43  -6   90.35   33.56
   0  43  -6   91.87   25.10
   0 -43   7    7.76   42.96
   0 -43   7   37.97   21.39
   0 -43   7   67.46   43.30
   0 -43  -7   50.27   32.69
   0 -43  -7   35.61   26.00
   0  43   7    1.98   47.75
   0  43   7   17.13   37.11
   0  43  -7   27.68   25.37
   0  43  -7   22.46   32.42
   0 -43   8   29.16   26.29
   0 -43   8  -30.23   41.41
   0 -43  -8    8.53   24.48
   0 -43  -8   23.07   34.02
   0  43   8   97.51   47.53
   0  43   8   35.54   36.34
   0  43  -8   28.96   30.12
   0  43  -8    4.97   33.70
   0 -43   9   72.71   43.95
   0 -43   9  103.50   27.95
   0 -43  -9  143.20   34.02
   0 -43  -9   52.86   39.61
   0  43   9   21.90   56.08
   0  43   9   99.75   46.29
   0  43  -9   25.54   34.65
   0  43  -9   20.95   36.07
   0 -44   0   66.39   25.01
   0 -44   0   -0.65   41.19
   0  44   0   75.31   47.04
   0  44   0   30.46   20.96
   0 -44   1  185.70   32.40
   0 -44  -1  119.60   36.53
   0 -44  -1  135.30   28.18
   0  44   1  170.20   45.30
   0  44   1  133.60   29.45
   0  44  -1  126.00   37.11
   0  44  -1   72.13   23.89
   0 -44   2  -16.84   20.57
   0 -44   2  -29.49   43.22
   0 -44  -2   50.88   26.01
   0 -44  -2    6.97   33.01
   0  44   2  -24.96   41.12
   0  44   2   16.62   26.41
   0  44  -2  -10.63   35.29
   0 -44   3  211.00   27.79
   0 -44   3  210.40   55.16
   0 -44  -3  210.90   31.42
   0 -44  -3  225.90   35.33
   0  44   3  192.10   31.54
   0  44   3  214.10   48.79
   0  44  -3  213.70   35.81
   0  44  -3  247.10   30.31
   0 -44   4    8.78   41.05
   0 -44   4    1.17   20.27
   0 -44  -4  -73.81   38.67
   0 -44  -4   -6.92   25.66
   0  44   4   21.92   46.08
   0  44   4  -20.69   43.34
   0  44   4   -2.51   28.15
   0  44  -4   27.11   30.13
   0  44  -4    1.47   23.59
   0 -44   5   11.78   39.54
   0 -44   5   80.68   22.21
   0 -44  -5   70.30   27.90
   0 -44  -5   73.08   27.03
   0  44   5   32.68   28.51
   0  44   5   35.93   42.60
   0  44  -5   72.13   25.08
   0  44  -5   73.04   31.31
   0 -44   6    1.84   38.56
   0 -44   6    5.34   20.49
   0 -44  -6   29.21   32.01
   0 -44  -6    3.79   31.83
   0  44   6  -31.85   28.56
   0  44   6  -10.11   39.36
   0  44  -6  -15.86   32.73
   0  44  -6   -0.28   24.54
   0 -44   7  140.30   22.76
   0 -44   7   88.18   46.47
   0 -44   7  177.30   56.38
   0 -44  -7  193.60   38.98
   0 -44  -7  174.30   32.10
   0  44   7  167.10   42.46
   0  44   7   29.31   42.91
   0  44  -7  123.30   29.80
   0  44  -7   58.53   31.58
   0 -44   8  -43.80   39.38
   0 -44   8   45.07   40.88
   0 -44   8   77.14   26.37
   0 -44  -8   -9.50   27.24
   0 -44  -8   49.71   37.70
   0  44   8   73.76   55.98
   0  44   8    4.53   38.53
   0  44  -8   31.64   35.75
   0  44  -8    1.02   31.06
   0  45   0  -37.12   40.53
   0  45   0   -7.70   23.82
   0 -45   1   68.64   44.24
   0 -45   1  164.20   27.23
   0 -45  -1  123.10   38.26
   0 -45  -1  168.50   35.52
   0  45   1  161.40   30.30
   0  45   1   85.84   41.61
   0  45  -1  105.90   26.19
   0  45  -1  110.70   38.87
   0 -45   2  134.40   45.25
   0 -45   2  164.90   25.12
   0 -45  -2  170.40   31.63
   0 -45  -2  114.10   36.55
   0  45   2  160.10   32.15
   0  45   2  127.20   42.82
   0  45  -2  205.00   39.49
   0  45  -2  131.80   25.79
   0 -45   3   34.60   19.96
   0 -45   3    1.02   50.50
   0 -45  -3   35.09   26.69
   0 -45  -3   16.30   32.58
   0  45   3   38.74   30.90
   0  45   3  -42.71   49.45
   0  45  -3    2.98   23.40
   0  45  -3  -18.72   28.54
   0 -45   4   56.28   39.30
   0 -45   4   18.87   21.61
   0 -45  -4   42.62   26.30
   0 -45  -4   23.77   38.73
   0  45   4   -0.50   47.56
   0  45   4    0.14   29.53
   0  45   4   40.43   46.71
   0  45  -4   23.01   30.92
   0  45  -4  -13.06   24.79
   0 -45   5  106.70   40.24
   0 -45   5  162.70   25.10
   0 -45  -5  120.50   32.75
   0 -45  -5  126.80   28.61
   0  45   5   67.93   42.78
   0  45   5  104.30   32.03
   0  45  -5  116.60   26.61
   0  45  -5  144.40   33.70
   0 -45   6  108.20   39.18
   0 -45   6  105.00   23.81
   0 -45  -6  118.60   34.49
   0 -45  -6  162.20   34.90
   0  45   6  168.20   32.07
   0  45   6   33.35   38.52
   0  45  -6  103.70   34.85
   0  45  -6  115.80   26.70
   0 -45   7  -13.27   21.95
   0 -45   7  -32.97   34.95
   0 -45   7  -46.86   42.44
   0 -45  -7   -3.86   34.72
   0 -45  -7   38.80   28.75
   0  45   7   20.18   39.38
   0  45   7  -31.03   47.59
   0  45  -7   -9.41   33.08
   0  45  -7   39.30   28.27
   0 -45   8   17.66   22.88
   0 -45   8   36.29   43.01
   0 -45   8   84.26   41.46
   0 -45  -8   31.00   37.83
   0 -45  -8   66.02   30.18
   0  45   8  -33.32   51.16
   0  45   8   39.56   41.29
   0  45  -8   15.99   37.42
   0  45  -8   17.35   32.74
   0 -46   0  701.70   72.89
   0 -46   0  695.10   63.27
   0  46   0  574.40   70.62
   0  46   0  621.10   58.05
   0 -46   1   11.00   24.71
   0 -46   1   -2.23   41.90
   0 -46  -1  -17.52   41.39
   0 -46  -1   11.52   25.99
   0  46   1   23.15   27.89
   0  46  -1   35.04   24.04
   0  46  -1   50.67   41.67
   0 -46   2   83.95   42.37
   0 -46   2  147.00   28.07
   0 -46  -2   95.42   31.91
   0  46   2   58.38   44.39
   0  46   2   58.49   28.77
   0  46  -2   96.08   27.38
   0  46  -2  177.20   41.06
   0 -46   3  -15.39   21.24
   0 -46   3  -30.27   50.79
   0 -46  -3  -11.45   34.93
   0 -46  -3  -16.53   28.16
   0  46   3   -2.51   44.04
   0  46   3  -12.82   28.19
   0  46  -3  -17.89   23.88
   0  46  -3   24.10   29.75
   0 -46   4  383.30   54.06
   0 -46   4  350.30   36.23
   0 -46  -4  284.10   38.02
   0 -46  -4  397.50   47.61
   0  46   4  462.80   62.93
   0  46   4  374.50   41.49
   0  46   4  408.40   57.05
   0  46  -4  351.00   47.90
   0  46  -4  368.00   39.55
   0 -46   5   17.78   20.37
   0 -46   5   25.87   37.80
   0 -46  -5  -13.46   27.22
   0 -46  -5  -22.89   30.97
   0  46   5  -30.46   41.20
   0  46   5    8.77   52.28
   0  46   5   30.39   35.19
   0  46  -5    3.45   23.84
   0  46  -5   19.71   31.80
   0 -46   6   86.96   38.75
   0 -46   6   50.77   22.89
   0 -46  -6  104.00   36.32
   0 -46  -6   12.63   34.36
   0  46   6   60.72   34.94
   0  46   6   82.78   43.39
   0  46  -6  116.70   34.94
   0  46  -6   82.16   27.99
   0 -46   7   55.45   42.58
   0 -46   7   -7.37   22.50
   0 -46  -7   45.64   38.89
   0 -46  -7   34.48   31.21
   0  46   7  -15.51   38.71
   0  46   7  -83.35   52.22
   0  46  -7    7.07   36.14
   0  46  -7    7.30   27.57
   0 -47   0  -35.85   22.84
   0 -47   0   12.02   41.02
   0  47   0  -33.72   45.07
   0  47   0    0.83   27.89
   0 -47   1  275.00   51.89
   0 -47   1  208.10   30.44
   0 -47  -1  149.10   45.54
   0 -47  -1  191.60   30.94
   0  47   1  158.10   30.92
   0  47   1  186.70   46.24
   0  47  -1  280.50   34.41
   0  47  -1  195.30   40.61
   0 -47   2   76.57   22.72
   0 -47   2   73.28   42.21
   0 -47  -2   73.74   43.15
   0 -47  -2  122.10   31.59
   0  47   2   88.54   44.34
   0  47   2  113.50   31.42
   0  47  -2  132.40   38.81
   0  47  -2  106.90   28.63
   0 -47   3   90.85   23.36
   0 -47   3  117.60   48.95
   0 -47  -3   88.74   31.54
   0 -47  -3  115.50   40.06
   0  47   3   46.83   49.01
   0  47  -3   72.44   32.44
   0  47  -3   38.07   25.42
   0 -47   4   31.74   40.97
   0 -47   4    8.54   20.99
   0 -47  -4   -0.92   30.00
   0 -47  -4  -17.31   33.86
   0  47  -4   19.92   24.84
   0  47  -4    1.35   33.73
   0 -47   5  100.40   37.88
   0 -47   5  162.40   26.41
   0 -47  -5  177.20   37.59
   0 -47  -5   98.19   35.00
   0  47  -5  203.20   38.42
   0  47  -5  135.40   29.41
   0 -47   6   36.30   24.47
   0 -47   6  -15.36   39.48
   0 -47  -6    4.16   36.25
   0 -47  -6    0.78   34.93
   0  47   6   45.09   51.24
   0  47  -6   22.29   28.83
   0  47  -6   24.43   35.26
   0 -47   7    2.70   21.87
   0 -47   7   43.51   45.00
   0 -47  -7   51.66   37.04
   0 -47  -7  -30.30   26.88
   0  47   7  -33.20   48.68
   0  47   7    0.47   39.10
   0  47  -7   26.04   35.76
   0  47  -7   10.72   31.26
   0 -48   0   73.34   27.02
   0 -48   0   60.68   39.71
   0  48   0   15.80   46.84
   0  48   0   29.56   28.36
   0 -48   1  328.40   55.31
   0 -48   1  280.30   34.05
   0 -48  -1  239.70   34.97
   0 -48  -1  264.10   46.74
   0  48   1  261.40   36.99
   0  48   1  401.60   65.29
   0  48  -1  430.30   56.08
   0  48  -1  384.10   41.74
   0 -48   2   54.26   38.31
   0 -48   2   82.91   26.93
   0 -48  -2   80.10   40.44
   0 -48  -2   89.48   33.75
   0  48   2   33.91   30.33
   0  48   2   79.16   48.98
   0  48  -2  123.10   39.03
   0  48  -2   62.07   30.45
   0 -48   3  114.60   50.57
   0 -48   3  220.10   29.18
   0 -48  -3  216.20   39.96
   0 -48  -3  126.30   33.76
   0  48   3  269.70   42.01
   0  48   3  154.00   48.20
   0  48  -3  200.30   31.12
   0  48  -3  132.30   33.83
   0 -48   4   41.31   22.46
   0 -48   4   87.90   40.61
   0 -48  -4   15.66   35.93
   0 -48  -4   15.32   30.89
   0  48   4  136.80   51.52
   0  48   4   67.44   35.20
   0  48  -4   32.83   31.82
   0  48  -4   36.48   26.00
   0 -48   5    7.56   22.04
   0 -48   5  -19.58   41.02
   0 -48  -5   18.64   34.56
   0 -48  -5    7.59   35.56
   0  48   5    2.78   43.21
   0  48   5   59.27   49.37
   0  48   5   51.34   30.32
   0  48  -5  -14.23   27.10
   0  48  -5   18.40   39.61
   0 -48   6  -19.74   25.01
   0 -48   6   -6.50   43.17
   0 -48  -6  -38.18   32.89
   0 -48  -6  -40.51   33.72
   0  48   6  -27.96   36.89
   0  48   6   28.65   48.27
   0  48  -6    2.97   28.89
   0  48  -6   -9.81   37.61
   0 -48   7  154.70   49.73
   0 -48   7  286.80   31.97
   0 -48  -7  180.60   34.89
   0 -48  -7  291.30   44.57
   0  48   7  235.80   45.20
   0  48   7  269.20   52.76
   0  48  -7  182.00   39.42
   0  48  -7  241.00   38.79
   0 -49   0   24.68   26.97
   0 -49   0  -29.33   40.97
   0  49   0   -3.09   31.32
   0  49   0   50.14   57.91
   0 -49   1   68.55   23.35
   0 -49   1   13.13   41.24
   0 -49  -1   53.33   39.57
   0 -49  -1   48.05   33.98
   0  49   1   23.11   31.01
   0  49   1  -26.71   62.46
   0  49  -1   42.51   39.36
   0  49  -1   23.50   27.13
   0 -49   2  220.00   41.24
   0 -49   2  308.20   35.87
   0 -49  -2  235.60   47.91
   0 -49  -2  227.30   37.74
   0  49   2  221.30   37.93
   0  49   2  300.60   57.69
   0  49  -2  337.60   42.49
   0  49  -2  294.50   45.68
   0 -49   3   18.17   23.34
   0 -49   3   59.77   41.66
   0 -49  -3   -1.54   36.30
   0 -49  -3   19.75   32.16
   0  49   3  -26.72   32.17
   0  49   3   -1.73   46.01
   0  49  -3  -20.72   31.17
   0  49  -3   13.82   28.13
   0 -49   4   41.39   23.19
   0 -49   4   56.13   49.39
   0 -49  -4   67.30   33.83
   0 -49  -4    3.92   36.44
   0  49   4   50.31   34.87
   0  49   4   95.51   45.37
   0  49  -4   21.76   32.05
   0  49  -4    2.25   25.91
   0 -49   5    2.77   42.66
   0 -49   5   21.47   24.25
   0 -49  -5  -10.62   37.21
   0 -49  -5   45.02   35.19
   0  49   5  -20.35   57.72
   0  49   5   71.43   37.88
   0  49   5   63.09   45.66
   0  49  -5  -15.48   33.68
   0  49  -5   15.01   27.79
   0 -49   6   94.23   43.78
   0 -49   6  108.10   26.68
   0 -49  -6  182.00   42.14
   0 -49  -6  135.10   37.96
   0  49   6   65.08   44.58
   0  49   6  168.60   50.72
   0  49   6  111.00   39.29
   0  49  -6   91.41   34.13
   0  49  -6   80.33   37.00
   0 -50   0  232.60   46.91
   0 -50   0  176.80   32.32
   0  50   0  251.20   43.73
   0  50   0  154.50   47.11
   0 -50   1   29.28   24.93
   0 -50   1  125.70   43.38
   0 -50  -1   42.79   42.18
   0 -50  -1  120.70   30.63
   0  50   1  120.50   33.58
   0  50   1   67.82   58.07
   0  50  -1   91.64   32.08
   0  50  -1   29.49   37.63
   0 -50   2  -12.23   28.45
   0 -50   2    4.11   41.93
   0 -50  -2   24.69   35.68
   0 -50  -2   48.57   39.71
   0  50   2   25.60   33.05
   0  50   2   15.55   45.56
   0  50  -2   -6.45   31.46
   0  50  -2   -8.76   36.87
   0 -50   3   66.77   25.89
   0 -50   3   22.48   40.95
   0 -50  -3   10.41   33.35
   0 -50  -3    0.50   40.84
   0  50   3   28.97   34.16
   0  50   3   12.92   46.76
   0  50  -3   18.61   32.46
   0  50  -3   63.26   28.44
   0 -50   4  139.90   50.76
   0 -50   4  104.20   25.39
   0 -50  -4  121.10   39.22
   0 -50  -4  158.60   36.39
   0  50   4  143.60   40.84
   0  50   4   85.96   45.77
   0  50  -4  166.70   30.93
   0  50  -4  163.70   38.99
   0 -50   5  -83.20   65.41
   0 -50   5   14.68   23.97
   0 -50  -5   25.76   34.56
   0 -50  -5   -4.65   36.31
   0  50   5   13.96   40.85
   0  50   5    7.78   54.04
   0  50  -5   20.52   30.53
   0  50  -5  112.90   36.96
   0 -50   6   76.26   25.16
   0 -50   6  109.20   48.46
   0 -50  -6   75.46   41.96
   0 -50  -6  130.70   37.69
   0  50   6   47.29   49.97
   0  50   6   59.13   38.17
   0  50   6   22.56   45.68
   0  50  -6  132.70   37.84
   0  50  -6  101.00   34.19
   0 -51   0    9.72   40.48
   0 -51   0    4.49   26.55
   0  51   0  -70.38   42.58
   0  51   0   20.44   32.06
   0 -51   1  200.10   50.36
   0 -51   1  174.30   31.31
   0 -51  -1  181.50   43.07
   0 -51  -1  201.00   31.82
   0  51   1  193.80   37.39
   0  51   1  126.30   45.32
   0  51  -1  156.30   38.33
   0  51  -1  209.00   34.40
   0 -51   2   31.66   26.30
   0 -51   2  -19.06   46.40
   0 -51  -2   61.38   30.72
   0 -51  -2   77.82   37.65
   0  51   2   18.94   34.49
   0  51   2  -15.22   45.04
   0  51  -2   77.79   36.77
   0  51  -2   65.77   29.71
   0 -51   3   68.87   39.00
   0 -51   3   47.41   25.53
   0 -51  -3   66.90   33.04
   0 -51  -3   46.45   35.76
   0  51   3   28.53   39.25
   0  51   3   17.34   43.46
   0  51  -3   47.91   31.46
   0  51  -3  150.80   31.70
   0 -51   4   19.52   23.47
   0 -51   4    2.02   47.31
   0 -51  -4   56.12   35.47
   0 -51  -4   21.61   33.10
   0  51   4  -35.25   46.87
   0  51   4   38.27   41.93
   0  51  -4   33.08   29.54
   0  51  -4   10.89   37.45
   0 -51   5  261.40   33.20
   0 -51   5  366.60   78.15
   0 -51  -5  251.90   44.65
   0 -51  -5  209.40   43.42
   0  51   5   83.33   52.95
   0  51   5  211.80   42.45
   0  51  -5  256.30   38.92
   0  51  -5  287.70   45.85
   0 -52   0  -17.07   40.06
   0 -52   0   66.06   30.16
   0  52   0   15.47   35.26
   0  52   0    7.21   48.83
   0 -52   1  200.10   31.92
   0 -52   1  183.70   49.19
   0 -52  -1  215.10   44.02
   0 -52  -1  146.70   31.92
   0  52   1  141.70   36.70
   0  52   1  174.80   52.68
   0  52  -1  265.30   39.61
   0  52  -1  147.50   39.97
   0 -52   2   -8.51   29.80
   0 -52   2  -18.40   39.95
   0 -52  -2   19.34   38.21
   0 -52  -2  -15.66   30.55
   0  52   2  -18.53   39.81
   0  52   2   13.46   40.37
   0  52  -2    0.52   28.55
   0  52  -2   17.91   36.18
   0 -52   3  166.20   41.59
   0 -52   3   90.58   25.39
   0 -52  -3   48.95   43.25
   0 -52  -3  106.70   34.90
   0  52   3  118.90   42.65
   0  52   3   68.60   43.23
   0  52  -3  171.10   33.01
   0  52  -3  123.80   35.63
   0 -52   4   25.17   50.46
   0 -52   4  160.40   28.43
   0 -52  -4   95.74   43.87
   0 -52  -4  151.70   38.68
   0  52   4  124.60   42.98
   0  52   4    9.61   40.81
   0  52  -4  110.00   31.73
   0  52  -4   70.30   35.79
   0 -53   0    9.92   29.93
   0 -53   0   47.46   38.92
   0  53   0   33.06   34.45
   0  53   0   -9.06   39.84
   0 -53   1   25.95   26.96
   0 -53   1    0.37   38.64
   0 -53  -1  -71.51   43.01
   0 -53  -1  -14.99   30.49
   0  53   1   -1.20   35.42
   0  53   1   58.49   50.41
   0  53  -1  -21.92   30.83
   0  53  -1   11.01   40.21
   0 -53   2  228.50   32.01
   0 -53   2  186.40   45.34
   0 -53  -2   76.51   41.13
   0 -53  -2  150.70   34.39
   0  53   2  208.40   45.36
   0  53   2  176.70   41.88
   0  53  -2  255.80   37.84
   0  53  -2  163.60   38.85
   0 -53   3   25.85   24.11
   0 -53   3  -44.23   42.00
   0 -53  -3  -22.87   38.98
   0 -53  -3    6.56   46.88
   0  53   3  -24.00   44.74
   0  53   3  -78.61   42.55
   0  53  -3   35.13   44.76
   0  53  -3  -18.43   32.43
   0 -54   0  372.20   41.43
   0 -54   0  232.90   47.40
   0  54   0  233.00   43.06
   0  54   0  280.90   42.27
   0 -54   1   -5.09   24.34
   0 -54   1    5.26   44.36
   0 -54  -1    9.54   29.92
   0 -54  -1   56.00   41.08
   0  54   1   22.87   43.04
   0  54   1  -11.27   47.73
   0  54  -1    7.24   33.17
   0  54  -1   30.19   40.11
   0 -54   2  -44.29   27.13
   0 -54   2    0.95   46.02
   0 -54  -2  -10.16   41.58
   0 -54  -2  -18.80   33.81
   0  54   2   22.92   41.29
   0  54   2   -0.38   43.84
   0  54  -2   46.19   37.14
   0  54  -2  -35.96   33.64
   0 -55   0   23.12   28.99
   0  55   0   11.92   44.74
   1   0 -14  -13.43   22.49
   1   0 -14    2.85   26.63
  -1   0  14  -10.18   31.53
  -1   0  14    7.41   36.72
   1   0 -13   41.92   22.55
   1   0 -13   25.71   21.85
  -1   0  13   28.41   25.68
  -1   0  13   20.20   25.54
   1   0 -12    1.61   13.19
   1   0 -12    9.30   17.51
  -1   0  12   13.62   25.56
  -1   0  12   13.69   23.10
   1   0 -11  163.30   20.48
   1   0 -11  155.80   20.72
  -1   0  11  142.60   30.13
  -1   0  11  152.00   23.61
   1   0 -10  -13.61   14.78
   1   0 -10   -6.34   17.40
  -1   0  10   -8.88   12.65
  -1   0  10  -46.68   24.98
   1   0  -9   79.89   18.08
   1   0  -9   88.03   12.61
  -1   0   9   53.11   21.57
  -1   0   9   80.74   15.75
   1   0  -8    3.26   11.29
   1   0  -8    5.90   11.78
  -1   0   8   -3.59   10.56
  -1   0   8   -5.82   14.49
   1   0  -7  703.60   57.85
   1   0  -7  578.80   48.66
  -1   0   7  752.70   62.19
  -1   0   7  692.30   58.92
   1   0  -6    0.26    7.53
   1   0  -6   13.28    9.85
  -1   0   6  -10.82    9.92
  -1   0   6    3.55    8.44
   1   0  -5  570.60   46.72
   1   0  -5  489.00   40.81
  -1   0   5  574.30   48.01
  -1   0   5  609.40   50.05
   1   0  -4   -4.40    5.39
   1   0  -4    8.69    6.00
  -1   0   4   -1.51    5.81
  -1   0   4   -3.25    5.92
   1   0  -3 2550.00  204.20
   1   0  -3 2765.00  221.40
  -1   0   3 2934.00  234.90
  -1   0   3 2881.00  230.80
   1   0  -2    0.20    2.57
   1   0  -2    2.77    3.09
  -1   0   2   -2.31    2.90
  -1   0   2   -1.34    2.70
   1   0  -1 2388.00  190.90
   1   0  -1 2100.00  167.90
  -1   0   1 2246.00  179.60
  -1   0   1 1973.00  157.80
   1   0   0    2.14    1.11
   1   0   0   -1.45    1.87
  -1   0   0    1.27    1.76
  -1   0   0    1.12    1.13
   1   0   1 4716.00  376.90
   1   0   1 4922.00  393.50
  -1   0  -1 5180.00  414.10
  -1   0  -1 4771.00  381.30
   1   0   2   -0.94    6.01
   1   0   2    4.97    3.78
  -1   0  -2    6.62    2.82
  -1   0  -2    0.09    5.68
   1   0   3 1106.00   89.70
   1   0   3  985.70   79.48
  -1   0  -3 1011.00   81.58
  -1   0  -3 1221.00   98.66
   1   0   4   -5.74    9.13
   1   0   4   -4.15    6.44
  -1   0  -4   -3.48    5.61
  -1   0  -4   -5.90    8.99
   1   0   5  131.00   15.45
   1   0   5  180.60   16.86
  -1   0  -5  137.10   13.71
  -1   0  -5  138.00   15.98
   1   0   6    5.49   11.53
   1   0   6    3.11    9.35
  -1   0  -6    1.68   12.94
  -1   0  -6   -0.62    7.73
   1   0   7 1109.00   90.10
   1   0   7  979.40   81.49
  -1   0  -7 1034.00   84.43
  -1   0  -7 1143.00   93.66
   1   0   8   -5.53   12.12
   1   0   8  -10.01   19.46
  -1   0  -8   -9.44   15.59
  -1   0  -8   -6.22   12.26
   1   0   9   19.12   10.87
   1   0   9   36.21   23.42
  -1   0  -9   30.35   14.59
  -1   0  -9   26.89   13.16
   1   0  10   -1.13   18.76
   1   0  10   -5.33   15.04
  -1   0 -10    8.14   12.01
  -1   0 -10   -3.89   19.84
   1   0  11  381.40   41.69
   1   0  11  326.90   34.25
  -1   0 -11  324.60   31.52
  -1   0 -11  394.60   38.21
   1   0  12    5.53   31.98
   1   0  12  -12.25   16.14
  -1   0 -12  -15.31   17.24
  -1   0 -12   -0.47   18.84
   1   0  13   -0.35   36.47
   1   0  13   10.26   21.00
  -1   0 -13    9.36   21.52
  -1   0 -13  -36.81   28.52
   1   0  14  -21.65   32.71
   1   0  14    8.19   42.26
  -1   0 -14  -10.61   28.77
  -1   0 -14    1.56   27.74
   1  -1 -14   14.14   25.07
   1  -1 -14  -17.78   31.24
  -1  -1  14   35.51   37.36
  -1  -1  14   35.53   34.00
   1   1 -14  -25.03   22.08
   1   1 -14  -16.91   23.15
  -1   1  14   49.78   36.66
  -1   1  14   58.96   28.13
   1  -1 -13   49.88   24.06
   1  -1 -13   70.09   21.38
  -1  -1  13   14.47   28.68
  -1  -1  13  103.00   28.34
   1   1 -13   36.73   20.99
   1   1 -13   98.65   23.90
  -1   1  13  104.70   25.64
  -1   1  13   24.30   25.05
   1  -1 -12  185.20   24.29
   1  -1 -12  170.20   20.48
  -1  -1  12  104.50   25.63
  -1  -1  12  137.50   25.95
   1   1 -12  160.80   23.98
   1   1 -12  141.90   22.75
  -1   1  12  200.20   30.90
  -1   1  12  209.90   35.80
   1  -1 -11   -5.38   16.90
   1  -1 -11   17.83   16.66
  -1  -1  11    1.39   24.12
  -1  -1  11   -1.27   19.10
   1   1 -11    0.31   11.71
   1   1 -11   13.06   16.42
  -1   1  11    3.53   24.11
  -1   1  11   -7.61   15.24
   1  -1 -10   50.12   11.85
   1  -1 -10   21.74   17.97
  -1  -1  10   74.54   25.20
  -1  -1  10   48.46   17.04
   1   1 -10   74.08   14.67
   1   1 -10   50.36   13.12
  -1   1  10   65.73   17.39
  -1   1  10   84.93   24.59
   1  -1  -9  467.80   41.57
   1  -1  -9  512.00   44.61
  -1  -1   9  412.10   40.09
  -1  -1   9  504.50   43.66
   1   1  -9  457.80   39.98
   1   1  -9  521.70   46.30
  -1   1   9  454.60   44.87
  -1   1   9  501.60   44.09
   1  -1  -8  213.10   22.38
   1  -1  -8  229.70   22.35
  -1  -1   8  190.80   19.27
   1   1  -8  185.90   21.10
   1   1  -8  189.70   20.05
  -1   1   8  181.20   23.84
  -1   1   8  214.10   21.85
   1  -1  -7  107.00   12.16
   1  -1  -7   96.70   15.04
  -1  -1   7   78.54   16.55
  -1  -1   7   65.75   11.90
   1   1  -7   78.60   11.50
   1   1  -7  100.30   11.51
  -1   1   7  116.90   14.23
  -1   1   7   89.65   16.80
   1  -1  -6  348.80   30.02
   1  -1  -6  420.30   35.31
  -1  -1   6  371.30   32.67
  -1  -1   6  347.20   29.39
   1   1  -6  331.50   29.59
   1   1  -6  343.20   29.51
  -1   1   6  389.40   34.65
  -1   1   6  334.90   29.27
   1  -1  -5 1909.00  153.60
   1  -1  -5 1993.00  160.20
  -1  -1   5 1865.00  150.30
  -1  -1   5 2247.00  180.30
   1   1  -5 1800.00  144.70
   1   1  -5 1976.00  158.90
  -1   1   5 1712.00  138.00
  -1   1   5 1700.00  136.80
   1  -1  -4  210.10   18.96
   1  -1  -4  283.90   23.97
  -1  -1   4  232.20   19.92
   1   1  -4  231.00   19.89
   1   1  -4  271.10   23.41
  -1   1   4  257.00   21.94
  -1   1   4  282.40   24.89
   1  -1  -3  154.30   13.55
   1  -1  -3  161.10   14.39
  -1  -1   3  128.10   11.77
  -1  -1   3  137.80   12.33
   1   1  -3  151.60   13.28
   1   1  -3  160.70   14.27
  -1   1   3  177.90   15.57
  -1   1   3  157.30   13.94
   1  -1  -2   99.70    8.85
   1  -1  -2   94.57    8.58
  -1  -1   2  104.60    9.11
  -1  -1   2  110.70    9.81
   1   1  -2   96.31    8.40
   1   1  -2   95.03    8.57
  -1   1   2  109.60    9.76
  -1   1   2  110.90    9.85
   1  -1  -1 1719.00  137.60
   1  -1  -1 1730.00  138.40
  -1  -1   1 1677.00  134.10
  -1  -1   1 1887.00  150.90
   1   1  -1 1775.00  141.90
   1   1  -1 1661.00  132.80
  -1   1   1 1780.00  142.50
  -1   1   1 1664.00  133.10
   1  -1   0  148.30   12.41
   1  -1   0  142.40   11.63
  -1  -1   0  155.70   12.71
  -1  -1   0  172.20   13.89
   1   1   0  150.20   12.27
   1   1   0  150.10   12.15
  -1   1   0  149.50   12.47
  -1   1   0  178.90   14.55
   1  -1   1  936.00   75.32
   1  -1   1 1339.00  107.20
  -1  -1  -1 1093.00   87.83
  -1  -1  -1 1091.00   87.44
   1   1   1 1205.00   96.73
   1   1   1 1330.00  106.50
  -1   1  -1 1334.00  107.00
  -1   1  -1 1317.00  105.50
   1  -1   2 4507.00  360.40
   1  -1   2 4065.00  325.40
  -1  -1  -2 5136.00  410.80
  -1  -1  -2 4134.00  330.60
   1   1   2 4014.00  321.20
   1   1   2 4150.00  331.80
  -1   1  -2 4205.00  336.30
  -1   1  -2 4844.00  387.50
   1  -1   3  726.50   59.42
   1  -1   3  903.70   72.94
  -1  -1  -3  740.50   60.11
  -1  -1  -3  674.70   55.34
   1   1   3  819.00   66.81
   1   1   3  804.80   65.12
  -1   1  -3  829.10   67.41
  -1   1  -3  756.30   61.23
   1  -1   4   16.63    8.92
   1  -1   4   13.05    6.59
  -1  -1  -4    6.60    9.26
  -1  -1  -4   12.52    5.98
   1   1   4    1.41    6.48
   1   1   4    1.70    9.35
  -1   1  -4   11.74    9.30
  -1   1  -4    1.29    5.36
   1  -1   5  690.80   57.73
   1  -1   5  568.40   47.12
  -1  -1  -5  668.70   55.54
  -1  -1  -5  596.40   49.35
   1   1   5  622.40   52.44
   1   1   5  600.90   49.40
  -1   1  -5  606.50   49.99
   1  -1   6  397.40   34.32
   1  -1   6  416.60   37.11
  -1  -1  -6  420.70   35.70
  -1  -1  -6  488.60   42.35
   1   1   6  373.50   33.56
   1   1   6  326.30   28.63
  -1   1  -6  323.80   30.56
  -1   1  -6  345.50   29.79
   1  -1   7   32.33   15.29
   1  -1   7   13.75   10.00
  -1  -1  -7   38.63   11.34
  -1  -1  -7   31.67   11.58
   1   1   7   36.98    8.39
   1   1   7   27.46   16.73
  -1   1  -7   29.46   14.76
  -1   1  -7   38.56    9.26
   1  -1   8  157.90   23.59
   1  -1   8  163.50   17.01
  -1  -1  -8  185.70   18.84
  -1  -1  -8  192.50   22.36
   1   1   8  183.80   24.22
   1   1   8  135.80   16.19
  -1   1  -8  184.00   20.11
  -1   1  -8  179.80   21.09
   1  -1   9  191.00   22.40
   1  -1   9  215.50   29.82
  -1  -1  -9  173.30   19.83
  -1  -1  -9  173.80   23.86
   1   1   9  183.80   22.17
   1   1   9  159.60   24.47
  -1   1  -9  151.10   19.63
  -1   1  -9  161.80   22.77
   1  -1  10  120.70   16.15
   1  -1  10   93.08   26.07
  -1  -1 -10   93.44   21.00
  -1  -1 -10   78.84   17.24
   1   1  10  132.10   28.77
   1   1  10   78.92   18.40
  -1   1 -10  117.80   20.04
  -1   1 -10   92.89   20.05
   1  -1  11   27.46   21.66
   1  -1  11   25.46   19.67
  -1  -1 -11   -2.74   18.08
  -1  -1 -11    4.93   15.88
   1   1  11  -11.40   27.87
   1   1  11   -0.64   17.76
  -1   1 -11  -13.58   20.52
  -1   1 -11   19.03   13.46
   1  -1  12   65.37   17.56
   1  -1  12   31.01   31.72
  -1  -1 -12  124.60   24.62
  -1  -1 -12   73.60   18.87
   1   1  12   65.42   17.72
   1   1  12   64.63   33.43
  -1   1 -12   64.56   18.47
  -1   1 -12   75.33   18.54
   1  -1  13   43.07   36.60
   1  -1  13   74.90   24.02
  -1  -1 -13  117.90   28.89
  -1  -1 -13    8.08   22.41
   1   1  13  104.70   23.64
   1   1  13   59.38   40.81
  -1   1 -13   67.38   22.25
  -1   1 -13   59.49   30.92
   1  -1  14   -1.00   42.25
   1  -1  14   56.74   30.87
  -1  -1 -14  -40.90   33.68
  -1  -1 -14  -26.80   25.03
   1   1  14    8.72   34.55
   1   1  14  -16.84   40.69
  -1   1 -14    0.90   23.75
  -1   1 -14   13.34   30.34
   1  -2 -14   93.36   33.87
   1  -2 -14   39.92   26.66
  -1  -2  14  178.80   44.54
  -1  -2  14   80.02   34.37
   1   2 -14   81.63   21.36
   1   2 -14   72.68   24.57
  -1   2  14   38.57   26.71
  -1   2  14   99.53   37.68
   1  -2 -13   19.57   23.65
   1  -2 -13  -17.67   16.76
  -1  -2  13   23.67   31.51
  -1  -2  13   40.93   26.16
   1   2 -13  -11.18   19.17
   1   2 -13    5.23   19.80
  -1   2  13  -30.05   25.28
  -1   2  13  -26.96   22.96
   1  -2 -12   39.30   17.58
   1  -2 -12   38.11   17.90
  -1  -2  12   48.68   23.37
  -1  -2  12   54.99   29.48
   1   2 -12   28.72   19.83
   1   2 -12   23.29   20.01
  -1   2  12   20.94   23.98
  -1   2  12   59.47   31.10
   1  -2 -11    3.85   12.66
   1  -2 -11   24.56   20.63
  -1  -2  11   13.28   23.04
  -1  -2  11   -6.23   18.34
   1   2 -11   17.41   18.11
   1   2 -11   21.43   16.90
  -1   2  11   14.09   14.63
  -1   2  11  -17.65   25.45
   1  -2 -10  271.40   27.64
   1  -2 -10  295.10   29.29
  -1  -2  10  309.70   31.79
  -1  -2  10  331.20   32.50
   1   2 -10  300.20   30.90
   1   2 -10  278.40   27.89
  -1   2  10  312.60   32.41
  -1   2  10  357.30   39.07
   1  -2  -9   26.41   13.00
   1  -2  -9   38.18   16.46
  -1  -2   9   52.37   14.96
  -1  -2   9   35.36   16.84
   1   2  -9   56.69   15.23
   1   2  -9   48.09   13.14
  -1   2   9   31.06   13.82
  -1   2   9   68.82   21.19
   1  -2  -8  185.00   18.39
   1  -2  -8  187.20   21.57
  -1  -2   8  153.30   17.89
  -1  -2   8  230.50   25.00
   1   2  -8  179.80   18.59
   1   2  -8  153.50   17.49
  -1   2   8  180.30   23.74
  -1   2   8  245.90   23.29
   1  -2  -7   19.59   12.69
   1  -2  -7    9.10    7.30
  -1  -2   7   11.97    9.73
  -1  -2   7    5.73   11.65
   1   2  -7    3.05    8.54
   1   2  -7    4.96    8.33
  -1   2   7   18.30    9.25
  -1   2   7    1.87   14.12
   1  -2  -6  434.50   36.78
   1  -2  -6  402.20   34.53
  -1  -2   6  397.40   34.74
  -1  -2   6  351.50   29.97
   1   2  -6  398.70   34.62
   1   2  -6  358.70   30.52
  -1   2   6  415.90   35.29
  -1   2   6  447.10   38.28
   1  -2  -5  305.00   26.30
   1  -2  -5  301.30   26.72
  -1  -2   5  274.30   23.54
  -1  -2   5  268.90   24.47
   1   2  -5  266.40   23.81
   1   2  -5  279.00   23.99
  -1   2   5  241.20   21.00
  -1   2   5  265.50   23.77
   1  -2  -4 1806.00  145.00
   1  -2  -4 1738.00  139.80
  -1  -2   4 1678.00  134.80
  -1  -2   4 1842.00  148.20
   1   2  -4 1839.00  147.60
   1   2  -4 1775.00  142.70
  -1   2   4 1818.00  146.10
  -1   2   4 1789.00  143.90
   1  -2  -3  294.30   24.81
   1  -2  -3  234.80   19.64
  -1  -2   3  280.20   23.31
  -1  -2   3  226.70   19.57
   1   2  -3  268.60   22.68
   1   2  -3  291.00   23.95
  -1   2   3  267.40   22.86
  -1   2   3  262.10   21.99
   1  -2  -2  482.40   39.15
   1  -2  -2  437.30   35.56
  -1  -2   2  451.30   36.67
  -1  -2   2  474.20   38.25
   1   2  -2  457.70   36.97
   1   2  -2  446.90   36.25
  -1   2   2  444.90   36.14
  -1   2   2  436.30   35.57
   1  -2  -1    8.03    2.19
   1  -2  -1   12.28    3.11
  -1  -2   1   10.83    1.56
  -1  -2   1   11.88    1.39
   1   2  -1   10.77    1.37
   1   2  -1   11.34    1.55
  -1   2   1   15.32    2.63
  -1   2   1   12.05    3.24
   1  -2   0 7798.00  623.00
   1  -2   0 7926.00  633.20
  -1  -2   0 8001.00  639.20
   1   2   0 8163.00  652.10
  -1   2   0 8074.00  645.10
  -1   2   0 8587.00  685.90
   1  -2   1  575.80   46.68
   1  -2   1  532.70   42.94
  -1  -2  -1  597.60   48.11
  -1  -2  -1  625.10   50.47
   1   2   1  551.40   44.40
   1   2   1  579.60   46.90
  -1   2  -1  530.50   43.09
  -1   2  -1  545.60   44.02
   1  -2   2  144.40   12.82
   1  -2   2  144.00   14.06
  -1  -2  -2  129.30   11.59
  -1  -2  -2  123.90   11.36
   1   2   2  123.50   11.45
   1   2   2  174.40   15.02
  -1   2  -2  146.80   12.93
  -1   2  -2  156.80   14.55
   1  -2   3    2.59    5.31
   1  -2   3   -6.31    6.73
  -1  -2  -3   -2.46    7.14
  -1  -2  -3    2.61    4.28
   1   2   3    5.48    5.46
   1   2   3   12.11    5.30
  -1   2  -3    5.86    7.76
  -1   2  -3    5.23    4.31
   1  -2   4 2808.00  225.50
   1  -2   4 2493.00  200.00
  -1  -2  -4 2254.00  181.00
  -1  -2  -4 2235.00  179.80
   1   2   4 2559.00  205.80
   1   2   4 2729.00  218.80
  -1   2  -4 2453.00  196.80
  -1   2  -4 2378.00  191.20
   1  -2   5  460.70   38.26
   1  -2   5  428.90   37.51
  -1  -2  -5  434.40   36.21
  -1  -2  -5  475.90   40.79
   1   2   5  455.30   38.70
   1   2   5  404.30   34.08
  -1   2  -5  431.00   36.35
  -1   2  -5  408.80   34.91
   1  -2   6 1066.00   86.76
   1  -2   6  983.30   80.72
  -1  -2  -6  982.50   80.01
  -1  -2  -6  950.90   78.43
   1   2   6 1051.00   86.29
   1   2   6 1011.00   82.29
  -1   2  -6 1117.00   90.72
  -1   2  -6  945.10   78.13
   1  -2   7    1.66   15.51
   1  -2   7   -8.36   10.47
  -1  -2  -7    8.00   10.92
  -1  -2  -7    5.66   13.15
   1   2   7    0.35   15.56
   1   2   7    0.98   10.54
  -1   2  -7    2.93    8.97
  -1   2  -7    9.94   13.76
   1  -2   8  727.40   60.97
   1  -2   8  561.90   50.66
  -1  -2  -8  714.30   60.02
  -1  -2  -8  768.40   64.91
   1   2   8  664.90   58.98
   1   2   8  849.00   70.42
  -1   2  -8  865.50   72.84
  -1   2  -8  703.70   58.64
   1  -2   9   58.90   21.79
   1  -2   9   22.01   11.40
  -1  -2  -9   23.21   14.62
  -1  -2  -9   41.28   15.93
   1   2   9    7.79   23.23
   1   2   9   25.74   14.57
  -1   2  -9   40.72   14.16
  -1   2  -9   28.80   18.32
   1  -2  10  246.10   33.85
   1  -2  10  207.80   22.33
  -1  -2 -10  242.10   26.68
  -1  -2 -10  231.40   25.49
   1   2  10  244.70   25.41
   1   2  10  226.70   33.30
  -1   2 -10  243.30   25.94
  -1   2 -10  250.80   27.40
   1  -2  11   41.29   23.83
   1  -2  11   16.07   18.79
  -1  -2 -11    9.41   15.08
  -1  -2 -11    9.83   18.79
   1   2  11    2.77   13.96
   1   2  11   53.40   29.22
  -1   2 -11    9.95   21.58
  -1   2 -11    1.18   15.72
   1  -2  12   33.37   30.20
   1  -2  12   36.35   16.89
  -1  -2 -12    7.62   17.83
  -1  -2 -12    1.84   22.09
   1   2  12   25.93   17.59
   1   2  12    0.16   32.08
  -1   2 -12   44.84   15.86
  -1   2 -12   29.60   17.86
   1  -2  13   -0.79   23.13
   1  -2  13   16.28   36.15
  -1  -2 -13   17.63   24.84
  -1  -2 -13    9.39   21.80
   1   2  13   26.25   21.37
   1   2  13  -17.46   34.42
  -1   2 -13   -5.58   19.80
  -1   2 -13   35.73   29.96
   1  -2  14   77.78   25.63
   1  -2  14   67.87   41.26
  -1  -2 -14   76.08   24.44
  -1  -2 -14   51.88   37.26
   1   2  14   97.51   31.59
   1   2  14   34.17   38.01
  -1   2 -14   39.80   24.64
  -1   2 -14   75.63   32.49
   1  -3 -14    3.20   23.84
   1  -3 -14   52.92   35.58
  -1  -3  14   13.46   29.24
  -1  -3  14  -11.99   37.13
   1   3 -14  -14.55   19.23
   1   3 -14   34.14   28.66
  -1   3  14   -9.37   36.38
  -1   3  14   19.69   25.15
   1  -3 -13   34.51   24.95
   1  -3 -13   33.14   16.09
  -1  -3  13   54.47   31.45
  -1  -3  13   49.52   26.11
   1   3 -13   49.70   20.19
   1   3 -13   31.67   17.62
  -1   3  13   39.46   23.87
  -1   3  13   21.85   25.69
   1  -3 -12   48.38   17.75
   1  -3 -12   48.68   19.45
  -1  -3  12   63.85   23.07
  -1  -3  12   36.15   31.83
   1   3 -12   39.19   16.35
   1   3 -12   47.92   21.60
  -1   3  12   82.83   24.40
  -1   3  12    1.19   30.43
   1  -3 -11   67.41   22.39
   1  -3 -11   63.47   13.61
  -1  -3  11   63.13   27.85
  -1  -3  11   37.89   16.40
   1   3 -11   21.55   20.03
   1   3 -11   64.81   15.19
  -1   3  11   75.47   19.51
  -1   3  11   35.31   26.96
   1  -3 -10   25.63   12.69
   1  -3 -10   12.25   16.16
  -1  -3  10   35.15   23.71
  -1  -3  10   35.54   13.64
   1   3 -10   26.16   12.80
   1   3 -10   15.91   17.78
  -1   3  10   -8.95   15.06
  -1   3  10   30.12   20.99
   1  -3  -9  224.90   23.63
   1  -3  -9  251.20   24.66
  -1  -3   9  201.90   20.44
  -1  -3   9  183.40   25.81
   1   3  -9  210.70   24.73
   1   3  -9  248.10   23.21
  -1   3   9  242.60   26.47
  -1   3   9  253.50   26.72
   1  -3  -8  112.80   15.96
   1  -3  -8  111.70   14.20
  -1  -3   8  100.40   13.73
  -1  -3   8  126.70   20.06
   1   3  -8  106.50   13.25
   1   3  -8   75.87   15.03
  -1   3   8  121.10   16.82
  -1   3   8  106.40   16.44
   1  -3  -7   59.37   13.72
   1  -3  -7   58.52    9.15
  -1  -3   7   44.15    9.89
  -1  -3   7   84.36   15.64
   1   3  -7   70.34   11.70
   1   3  -7   56.28   12.14
  -1   3   7   51.54   14.63
  -1   3   7   50.53   10.19
   1  -3  -6  439.10   37.84
   1  -3  -6  408.20   34.60
  -1  -3   6  395.30   34.93
  -1  -3   6  438.90   37.00
   1   3  -6  401.20   33.74
   1   3  -6  409.70   34.95
  -1   3   6  464.30   38.97
  -1   3   6  393.10   33.90
   1  -3  -5 1185.00   95.95
   1  -3  -5 1192.00   96.30
  -1  -3   5 1238.00  100.30
  -1  -3   5 1150.00   92.89
   1   3  -5 1232.00   99.52
   1   3  -5 1081.00   87.47
  -1   3   5 1089.00   88.70
  -1   3   5 1213.00   98.23
   1  -3  -4  212.70   18.18
   1  -3  -4  204.70   18.19
  -1  -3   4  264.50   22.41
  -1  -3   4  226.20   20.60
   1   3  -4  201.20   18.16
   1   3  -4  204.10   17.69
  -1   3   4  168.80   15.77
  -1   3   4  233.80   20.92
   1  -3  -3 2376.00  190.50
   1  -3  -3 2050.00  164.30
  -1  -3   3 2071.00  166.10
  -1  -3   3 2443.00  195.60
   1   3  -3 2058.00  165.00
   1   3  -3 2166.00  173.50
  -1   3   3 2074.00  166.30
  -1   3   3 2015.00  161.70
   1  -3  -2  256.10   21.35
   1  -3  -2  332.50   27.24
  -1  -3   2  297.30   24.45
  -1  -3   2  288.60   23.45
   1   3  -2  325.50   26.43
   1   3  -2  317.20   25.96
  -1   3   2  345.20   28.35
  -1   3   2  305.40   25.37
   1  -3  -1 1079.00   86.67
   1  -3  -1 1093.00   87.63
  -1  -3   1 1022.00   81.76
  -1  -3   1 1118.00   89.47
   1   3  -1 1080.00   86.41
   1   3  -1 1019.00   81.58
  -1   3   1 1066.00   85.46
  -1   3   1 1078.00   86.71
   1  -3   0  149.40   12.39
   1  -3   0  189.80   16.01
  -1  -3   0  175.80   14.25
  -1  -3   0  188.70   15.21
   1   3   0  188.20   15.19
   1   3   0  173.50   14.09
  -1   3   0  164.30   13.64
  -1   3   0  150.20   13.00
   1  -3   1  881.00   71.03
   1  -3   1  713.90   57.45
  -1  -3  -1  732.70   59.02
  -1  -3  -1  733.80   58.93
   1   3   1  632.00   50.83
   1   3   1  770.10   61.98
  -1   3  -1  898.40   72.45
  -1   3  -1  807.30   64.89
   1  -3   2 2235.00  179.30
   1  -3   2 2857.00  228.70
  -1  -3  -2 2649.00  212.30
  -1  -3  -2 2791.00  223.40
   1   3   2 2580.00  206.50
  -1   3  -2 2937.00  235.10
  -1   3  -2 2850.00  228.40
   1  -3   3   14.38    7.96
  -1  -3  -3   26.48    5.67
  -1  -3  -3   13.61    6.96
   1   3   3   34.76    5.98
   1   3   3   29.49    8.30
  -1   3  -3   26.87    7.06
  -1   3  -3   23.95    5.82
   1  -3   4  408.60   33.91
   1  -3   4  449.60   38.06
  -1  -3  -4  497.40   41.22
  -1  -3  -4  490.00   41.37
   1   3   4  422.40   35.07
   1   3   4  376.90   32.65
  -1   3  -4  392.00   33.19
  -1   3  -4  458.10   37.87
   1  -3   5 1643.00  133.00
   1  -3   5 1811.00  145.80
  -1  -3  -5 1639.00  132.10
  -1  -3  -5 1574.00  127.20
   1   3   5 1652.00  133.70
   1   3   5 1763.00  141.90
  -1   3  -5 1562.00  126.00
  -1   3  -5 1454.00  117.80
   1  -3   6  735.60   60.60
   1  -3   6  634.20   53.60
  -1  -3  -6  754.40   61.90
  -1  -3  -6  651.10   54.83
   1   3   6  833.30   68.16
   1   3   6  625.30   52.64
  -1   3  -6  752.20   61.94
  -1   3  -6  629.30   53.31
   1  -3   7   21.14    8.18
   1  -3   7   -3.03   16.20
  -1  -3  -7    1.55    7.73
  -1  -3  -7   26.69   14.14
   1   3   7   -1.87   11.18
   1   3   7   15.38   11.63
  -1   3  -7   -0.08   10.14
  -1   3  -7   -3.41   10.77
   1  -3   8   68.65   20.96
   1  -3   8   49.45   10.16
  -1  -3  -8   41.78   16.80
  -1  -3  -8   56.77   10.71
   1   3   8   36.41   13.09
   1   3   8   44.03   16.94
  -1   3  -8   58.74   15.01
  -1   3  -8   42.42   13.58
   1  -3   9  306.40   27.90
   1  -3   9  297.00   34.93
  -1  -3  -9  295.80   27.42
  -1  -3  -9  258.40   28.16
   1   3   9  369.60   38.69
  -1   3  -9  324.40   30.77
  -1   3  -9  355.20   33.59
   1  -3  10  359.20   37.75
   1  -3  10  310.30   30.93
  -1  -3 -10  288.10   29.93
   1   3  10  332.00   31.19
   1   3  10  324.30   37.57
  -1   3 -10  316.00   31.89
  -1   3 -10  366.80   33.40
   1  -3  11   12.61   28.71
   1  -3  11   54.61   17.38
  -1  -3 -11   36.93   17.10
  -1  -3 -11   53.39   19.09
   1   3  11  -28.17   28.84
   1   3  11   62.75   15.73
  -1   3 -11   49.39   19.19
  -1   3 -11    1.25   22.48
   1  -3  12    5.01   25.40
   1  -3  12   32.86   16.75
  -1  -3 -12   78.56   23.29
  -1  -3 -12   41.75   18.57
   1   3  12   15.80   31.79
   1   3  12   15.13   17.55
  -1   3 -12   51.55   18.16
  -1   3 -12   21.77   15.13
   1  -3  13   21.18   35.04
   1  -3  13   -9.65   25.96
  -1  -3 -13   31.80   22.35
  -1  -3 -13   45.77   25.90
   1   3  13    9.71   20.78
   1   3  13  -13.47   33.66
  -1   3 -13   14.75   27.34
  -1   3 -13   11.00   17.35
   1  -3  14  -12.89   43.45
   1  -3  14  -15.73   23.20
  -1  -3 -14   -9.47   34.32
  -1  -3 -14   -1.05   23.69
   1   3  14  -15.83   31.59
   1   3  14  -14.09   24.72
  -1   3 -14   20.92   30.88
  -1   3 -14   24.80   24.20
   1  -4 -14   -1.03   30.65
   1  -4 -14    0.21   22.89
  -1  -4  14   47.38   22.80
  -1  -4  14   32.57   35.23
   1   4 -14   35.86   30.10
   1   4 -14   17.05   19.64
  -1   4  14  -24.95   37.59
  -1   4  14  -15.42   24.68
   1  -4 -13   31.24   16.42
   1  -4 -13  -14.72   26.21
  -1  -4  13   59.77   25.82
  -1  -4  13   30.90   28.83
   1   4 -13   12.79   20.26
   1   4 -13   20.65   15.25
  -1   4  13    5.59   25.29
  -1   4  13   64.01   25.33
   1  -4 -12    6.92   17.14
   1  -4 -12  -15.45   19.07
  -1  -4  12   18.50   21.44
  -1  -4  12    7.15   27.51
   1   4 -12    3.12   20.32
   1   4 -12  -14.80   14.03
  -1   4  12  -23.67   21.07
  -1   4  12  -19.73   29.68
   1  -4 -11  301.90   30.24
   1  -4 -11  357.20   36.88
  -1  -4  11  307.20   34.69
  -1  -4  11  293.50   28.88
   1   4 -11  317.50   34.15
   1   4 -11  338.90   33.22
  -1   4  11  287.10   32.83
  -1   4  11  275.70   36.27
   1  -4 -10   -4.88   13.73
   1  -4 -10    5.59   18.39
  -1  -4  10   -7.68   13.75
  -1  -4  10  -11.75   20.81
   1   4 -10   15.23   17.54
   1   4 -10   -9.70   14.94
  -1   4  10  -11.57   21.86
  -1   4  10  -10.63   15.14
   1  -4  -9   51.61   10.68
   1  -4  -9   33.06   15.69
  -1  -4   9   55.90   15.43
  -1  -4   9   29.55   19.59
   1   4  -9   51.83   13.47
   1   4  -9   54.34   13.00
  -1   4   9   40.33   22.18
  -1   4   9   58.10   13.75
   1  -4  -8    6.29   14.02
   1  -4  -8   -8.40   12.10
  -1  -4   8    0.94   10.69
  -1  -4   8  -26.25   17.06
   1   4  -8   -7.03   12.69
   1   4  -8  -13.06    9.21
  -1   4   8  -13.59   13.22
  -1   4   8  -15.77   18.30
   1  -4  -7 1684.00  136.40
   1  -4  -7 1823.00  147.00
  -1  -4   7 1774.00  143.80
  -1  -4   7 1664.00  134.20
   1   4  -7 1599.00  129.30
   1   4  -7 1594.00  129.10
  -1   4   7 1742.00  141.10
  -1   4   7 1692.00  136.80
   1  -4  -6   48.32    7.82
   1  -4  -6   64.29   12.09
  -1  -4   6   28.48   10.40
  -1  -4   6   65.71    9.73
   1   4  -6   35.80    8.08
   1   4  -6   41.84    8.82
  -1   4   6   48.91   10.02
  -1   4   6   54.88    9.48
   1  -4  -5   51.33    8.22
   1  -4  -5   36.67    9.54
  -1  -4   5   30.83    7.35
  -1  -4   5   23.32    8.38
   1   4  -5   30.00    8.76
   1   4  -5   27.08    7.20
  -1   4   5   39.00    7.93
  -1   4   5   30.40    8.09
   1  -4  -4  114.80   11.20
   1  -4  -4  155.00   13.86
  -1  -4   4  147.10   13.83
  -1  -4   4  135.00   13.86
   1   4  -4  119.30   12.31
   1   4  -4  116.10   11.27
  -1   4   4  132.30   13.61
  -1   4   4  132.00   13.46
   1  -4  -3 3609.00  288.80
   1  -4  -3 2968.00  237.70
  -1  -4   3 3528.00  282.40
  -1  -4   3 3351.00  268.10
   1   4  -3 2879.00  230.60
   1   4  -3 3285.00  262.90
  -1   4   3 3003.00  240.50
  -1   4   3 3372.00  270.00
   1  -4  -2  516.00   41.88
   1  -4  -2  507.90   41.29
  -1  -4   2  472.50   38.36
  -1  -4   2  500.80   40.37
   1   4  -2  541.10   43.62
   1   4  -2  433.00   35.13
  -1   4   2  494.00   40.42
  -1   4   2  447.60   36.58
   1  -4  -1  958.50   76.93
   1  -4  -1  833.10   67.27
  -1  -4   1  859.40   68.83
  -1  -4   1  840.90   67.31
   1   4  -1  910.90   72.96
   1   4  -1  881.20   70.52
  -1   4   1  999.70   80.22
  -1   4   1  944.00   76.12
   1  -4   0    0.88    2.40
   1  -4   0    0.70    4.00
  -1  -4   0    1.13    1.31
  -1  -4   0    0.15    1.44
   1   4   0    1.13    1.35
   1   4   0    5.00    1.67
  -1   4   0    0.97    3.78
  -1   4   0   -0.04    2.30
   1  -4   1  940.20   75.79
   1  -4   1  966.10   77.63
  -1  -4  -1  906.50   72.88
  -1  -4  -1  890.70   71.47
   1   4   1 1047.00   83.94
  -1   4  -1  907.20   72.91
  -1   4  -1  843.60   68.12
   1  -4   2  396.70   32.58
   1  -4   2  431.80   35.60
  -1  -4  -2  440.20   36.17
  -1  -4  -2  408.70   33.32
   1   4   2  381.10   31.21
   1   4   2  447.50   37.02
  -1   4  -2  445.60   36.32
  -1   4  -2  428.40   35.65
   1  -4   3  761.70   62.27
   1  -4   3  745.60   60.61
  -1  -4  -3  712.00   57.80
  -1  -4  -3  807.60   65.68
   1   4   3  631.40   51.37
   1   4   3  728.30   59.39
  -1   4  -3  771.00   62.55
  -1   4  -3  633.10   52.29
   1  -4   4   11.29    7.07
   1  -4   4   14.42    6.50
  -1  -4  -4   10.65    9.38
  -1  -4  -4   14.31    5.77
   1   4   4    9.91    6.24
   1   4   4    3.71    6.71
  -1   4  -4   18.95    9.36
  -1   4  -4   21.58    6.02
   1  -4   5  250.40   22.58
   1  -4   5  310.60   28.94
  -1  -4  -5  303.90   28.00
  -1  -4  -5  325.50   28.32
   1   4   5  307.40   26.85
   1   4   5  289.80   27.36
  -1   4  -5  300.00   27.63
  -1   4  -5  261.10   23.47
   1  -4   6   12.72    9.28
   1  -4   6    6.90   12.87
  -1  -4  -6   13.89    6.95
  -1  -4  -6   16.33   11.44
   1   4   6    4.30    8.46
   1   4   6    8.87   10.17
  -1   4  -6    0.19    9.88
  -1   4  -6    7.96   11.95
   1  -4   7  628.80   52.66
   1  -4   7  734.30   63.09
  -1  -4  -7  752.70   62.43
  -1  -4  -7  689.50   58.32
   1   4   7  763.90   65.14
   1   4   7  606.10   50.74
  -1   4  -7  666.30   56.04
  -1   4  -7  642.10   54.65
   1  -4   8    1.41   16.66
   1  -4   8  -15.17   12.61
  -1  -4  -8   -6.86   13.88
  -1  -4  -8   -1.60   12.56
   1   4   8   20.59   10.08
   1   4   8   -5.90   19.08
  -1   4  -8   -2.28   11.65
  -1   4  -8   22.98   16.60
   1  -4   9   15.51   17.22
   1  -4   9   39.64   14.53
  -1  -4  -9   13.73   13.09
  -1  -4  -9   52.51   18.48
   1   4   9   29.97   21.92
   1   4   9   22.28   16.09
  -1   4  -9   48.35   14.23
  -1   4  -9   10.04   16.89
   1  -4  10    3.80   23.28
   1  -4  10   -4.24   15.57
  -1  -4 -10   -2.74   21.50
  -1  -4 -10    7.94   11.60
   1   4  10    5.24   19.33
   1   4  10   -8.17   16.79
  -1   4 -10   -0.10   20.61
  -1   4 -10   26.56   16.67
   1  -4  11  101.60   31.03
   1  -4  11   86.88   16.59
  -1  -4 -11   33.88   14.41
  -1  -4 -11   63.35   21.44
   1   4  11   93.81   27.47
   1   4  11   76.51   18.86
  -1   4 -11   52.23   22.82
  -1   4 -11   29.63   17.71
   1  -4  12   24.58   16.33
   1  -4  12   11.77   24.92
  -1  -4 -12   -0.47   21.49
  -1  -4 -12  -17.34   19.00
   1   4  12  -20.00   31.67
   1   4  12  -10.32   18.13
  -1   4 -12   14.96   17.16
  -1   4 -12    8.19   17.58
   1  -4  13   21.50   27.00
   1  -4  13   10.61   32.23
  -1  -4 -13   29.82   25.41
  -1  -4 -13    2.54   22.67
   1   4  13    4.79   32.06
   1   4  13  -24.62   21.31
  -1   4 -13  -23.72   25.35
  -1   4 -13   -7.16   16.27
   1  -4  14   28.78   43.74
   1  -4  14   -1.66   23.23
  -1  -4 -14   -3.72   31.37
  -1  -4 -14   18.57   23.24
   1   4  14  -23.88   29.55
   1   4  14   16.45   24.58
  -1   4 -14  -54.99   32.44
  -1   4 -14    3.24   31.97
   1  -5 -14   47.88   29.96
   1  -5 -14   26.72   21.73
  -1  -5  14   23.99   30.07
  -1  -5  14    9.62   22.44
   1   5 -14   -8.44   22.21
   1   5 -14   12.47   32.19
  -1   5  14   -3.45   26.26
  -1   5  14  -17.42   35.90
   1  -5 -13  -17.19   16.18
   1  -5 -13   21.46   25.88
  -1  -5  13   12.28   24.16
  -1  -5  13   11.50   23.30
   1   5 -13   -6.99   21.36
   1   5 -13    9.66   19.63
  -1   5  13   -9.44   25.53
  -1   5  13  -19.30   27.14
   1  -5 -12   64.45   20.03
   1  -5 -12   48.68   18.89
  -1  -5  12  100.50   22.87
  -1  -5  12   56.97   25.02
   1   5 -12   63.36   21.41
   1   5 -12   88.82   21.52
  -1   5  12   93.21   20.88
  -1   5  12  119.30   32.25
   1  -5 -11    3.04   17.59
   1  -5 -11    7.80   17.22
  -1  -5  11   19.23   27.58
  -1  -5  11    6.04   13.01
   1   5 -11   10.38   16.81
   1   5 -11   20.21   20.27
  -1   5  11  -11.92   21.58
  -1   5  11  -18.83   25.71
   1  -5 -10  170.70   23.28
   1  -5 -10  160.60   20.81
  -1  -5  10  151.80   21.19
  -1  -5  10  201.10   30.62
   1   5 -10  130.70   19.40
   1   5 -10  129.50   16.65
  -1   5  10  137.00   25.42
  -1   5  10  188.00   25.47
   1  -5  -9  151.90   19.36
   1  -5  -9  112.70   17.94
  -1  -5   9  121.10   16.38
  -1  -5   9  143.20   21.79
   1   5  -9  139.00   20.94
   1   5  -9  130.30   17.67
  -1   5   9  141.90   22.26
  -1   5   9  132.80   23.31
   1  -5  -8   60.51   13.75
  -1  -5   8   57.89   11.93
  -1  -5   8   60.48   17.92
   1   5  -8   68.95   11.20
   1   5  -8   58.88   13.77
  -1   5   8   59.80   11.60
   1  -5  -7   41.13    9.57
   1  -5  -7   25.88   10.15
  -1  -5   7   20.27   14.18
  -1  -5   7   48.06    8.16
   1   5  -7   23.59    7.72
   1   5  -7   43.78   12.52
  -1   5   7   22.49   11.79
  -1   5   7   60.72   11.88
   1  -5  -6  422.10   35.35
   1  -5  -6  407.50   35.38
  -1  -5   6  464.30   40.56
  -1  -5   6  447.20   37.36
   1   5  -6  390.30   33.85
   1   5  -6  391.20   33.00
  -1   5   6  505.40   42.69
  -1   5   6  407.90   35.26
   1  -5  -5  185.00   16.86
   1  -5  -5  140.70   13.89
  -1  -5   5  146.80   13.61
  -1  -5   5  139.50   15.20
   1   5  -5  157.90   16.37
   1   5  -5  165.50   15.33
  -1   5   5  172.50   17.18
  -1   5   5  168.40   17.50
   1  -5  -4  882.10   71.56
   1  -5  -4  868.60   70.38
  -1  -5   4  732.00   59.36
  -1  -5   4  686.20   56.31
   1   5  -4  755.00   61.28
   1   5  -4  867.30   70.30
  -1   5   4  759.20   61.88
  -1   5   4  655.60   53.87
   1  -5  -3  499.80   40.82
   1  -5  -3  451.90   37.23
  -1  -5   3  495.50   40.65
  -1  -5   3  527.60   42.88
   1   5  -3  527.50   42.82
   1   5  -3  584.10   47.66
  -1   5   3  514.00   42.29
  -1   5   3  526.40   43.51
   1  -5  -2  727.60   58.78
   1  -5  -2  835.70   67.62
  -1  -5   2  795.50   64.10
  -1  -5   2  846.30   67.98
   1   5  -2  832.30   67.01
   1   5  -2  819.70   65.84
  -1   5   2  821.90   66.47
  -1   5   2  779.40   62.88
   1  -5  -1 1054.00   85.04
   1  -5  -1 1008.00   80.91
  -1  -5   1 1147.00   91.76
  -1  -5   1 1056.00   84.61
   1   5  -1 1114.00   89.14
   1   5  -1 1041.00   83.36
  -1   5   1 1163.00   93.29
  -1   5   1  963.30   77.91
   1  -5   0  135.00   11.56
   1  -5   0  129.90   12.08
  -1  -5   0  111.00    9.26
  -1  -5   0  100.50    8.50
   1   5   0  115.90    9.66
   1   5   0  112.10    9.48
  -1   5   0  111.50    9.77
  -1   5   0  120.60   11.20
   1  -5   1  901.40   72.90
   1  -5   1 1001.00   80.42
  -1  -5  -1  907.80   73.06
  -1  -5  -1  774.90   62.30
   1   5   1  839.10   67.57
   1   5   1 1007.00   80.77
  -1   5  -1 1033.00   83.28
  -1   5  -1  859.00   69.11
   1  -5   2 4913.00  393.10
   1  -5   2 3799.00  304.00
  -1  -5  -2 4873.00  389.80
  -1  -5  -2 4829.00  386.10
   1   5   2 4596.00  367.50
   1   5   2 4693.00  375.40
  -1   5  -2 5428.00  434.30
  -1   5  -2 5160.00  412.60
   1  -5   3  519.60   43.15
   1  -5   3  487.50   40.06
  -1  -5  -3  530.10   43.88
  -1  -5  -3  555.80   45.48
   1   5   3  630.60   51.91
   1   5   3  609.40   49.57
  -1   5  -3  542.20   45.12
   1  -5   4  118.60   12.45
   1  -5   4  164.00   16.69
  -1  -5  -4  138.80   13.48
  -1  -5  -4  105.30   13.34
   1   5   4  129.70   15.11
   1   5   4  165.40   15.43
  -1   5  -4  127.10   12.46
   1  -5   5  268.30   23.48
   1  -5   5  270.20   25.41
  -1  -5  -5  275.80   24.28
  -1  -5  -5  284.50   25.40
   1   5   5  257.20   22.58
   1   5   5  293.20   27.68
  -1   5  -5  277.00   24.68
  -1   5  -5  262.00   24.80
   1  -5   6 1289.00  105.90
   1  -5   6 1203.00   97.59
  -1  -5  -6 1057.00   85.85
  -1  -5  -6 1047.00   85.93
   1   5   6 1043.00   84.71
   1   5   6 1147.00   94.16
  -1   5  -6 1223.00   99.65
   1  -5   7   31.88   17.98
   1  -5   7    3.69   11.04
  -1  -5  -7  -20.96   12.17
  -1  -5  -7   10.44   11.70
   1   5   7    1.86    8.76
   1   5   7   -0.39   16.95
  -1   5  -7   20.73   12.17
  -1   5  -7   20.68   11.47
   1  -5   8  335.90   35.47
   1  -5   8  301.20   27.88
  -1  -5  -8  267.50   28.29
  -1  -5  -8  303.50   27.41
   1   5   8  320.40   29.91
   1   5   8  313.80   31.80
  -1   5  -8  283.10   26.57
  -1   5  -8  304.70   30.38
   1  -5   9  527.60   45.65
   1  -5   9  485.20   47.55
  -1  -5  -9  465.40   41.24
  -1  -5  -9  491.30   43.59
   1   5   9  491.30   42.60
   1   5   9  486.30   47.43
  -1   5  -9  536.60   48.84
  -1   5  -9  510.20   44.73
   1  -5  10   35.10   14.39
   1  -5  10   78.58   27.52
  -1  -5 -10   79.56   21.63
  -1  -5 -10   81.85   15.76
   1   5  10   53.32   22.79
   1   5  10   44.47   18.52
  -1   5 -10   12.40   16.18
  -1   5 -10   46.50   21.18
   1  -5  11   12.73   25.81
   1  -5  11    3.41   13.26
  -1  -5 -11   10.11   13.19
  -1  -5 -11   26.19   22.59
   1   5  11   -1.89   20.51
   1   5  11   46.93   24.53
  -1   5 -11   -3.79   12.79
  -1   5 -11  -28.57   22.70
   1  -5  12  142.30   20.72
   1  -5  12  177.80   35.18
  -1  -5 -12  144.90   25.92
  -1  -5 -12  188.90   27.35
   1   5  12  125.50   22.58
   1   5  12  139.80   35.31
  -1   5 -12  168.90   25.89
  -1   5 -12  108.80   21.88
   1  -5  13   53.90   30.75
   1  -5  13   91.72   27.40
  -1  -5 -13   56.40   25.46
  -1  -5 -13   87.71   22.95
   1   5  13   85.96   30.20
   1   5  13   63.61   22.54
  -1   5 -13   51.13   17.31
  -1   5 -13   52.64   23.02
   1  -5  14  -25.07   44.37
   1  -5  14   -2.62   26.37
  -1  -5 -14   50.41   30.49
  -1  -5 -14   12.93   23.34
   1   5  14   -2.68   23.75
   1   5  14    1.91   28.82
  -1   5 -14   59.87   35.45
  -1   5 -14    4.99   31.99
   1  -6 -14   51.69   26.46
   1  -6 -14   44.60   20.43
  -1  -6  14   51.04   29.75
  -1  -6  14   72.69   25.87
   1   6 -14   95.12   29.40
   1   6 -14    5.50   30.09
  -1   6  14   55.31   27.26
  -1   6  14   24.20   34.18
   1  -6 -13   13.55   17.13
   1  -6 -13   -1.74   26.21
  -1  -6  13  -19.29   22.04
  -1  -6  13    4.53   24.51
   1   6 -13    6.37   21.01
   1   6 -13  -31.73   23.87
  -1   6  13  -25.92   25.67
  -1   6  13    1.68   27.45
   1  -6 -12   48.30   16.32
   1  -6 -12   84.73   24.22
  -1  -6  12   20.76   33.13
  -1  -6  12   69.67   21.81
   1   6 -12   42.72   20.50
   1   6 -12   68.15   18.30
  -1   6  12   69.31   29.45
  -1   6  12   50.35   18.98
   1  -6 -11  -19.06   17.04
   1  -6 -11    3.14   15.06
  -1  -6  11   -4.09   14.15
  -1  -6  11    4.75   25.95
   1   6 -11  -23.39   20.21
   1   6 -11    0.84   13.76
  -1   6  11   -0.25   20.65
  -1   6  11   23.33   20.14
   1  -6 -10  153.50   19.69
   1  -6 -10  170.50   20.16
  -1  -6  10  171.20   22.13
  -1  -6  10  199.00   31.53
   1   6 -10  209.10   24.60
   1   6 -10  225.80   25.13
  -1   6  10  154.10   23.23
  -1   6  10  172.40   22.46
   1  -6  -9    7.17   15.40
   1  -6  -9   28.98   10.07
  -1  -6   9   -7.13   19.50
  -1  -6   9   -9.44   12.01
   1   6  -9   40.96   16.64
   1   6  -9   21.12   12.82
  -1   6   9   16.16   19.13
  -1   6   9   12.06   16.32
   1  -6  -8   48.07   13.24
   1  -6  -8   34.54   12.74
  -1  -6   8   61.53   18.44
  -1  -6   8   83.91   12.08
   1   6  -8  101.30   13.36
   1   6  -8   71.37   15.38
  -1   6   8   79.70   16.23
  -1   6   8   54.81   18.02
   1  -6  -7   -4.05    8.45
   1  -6  -7   12.29   10.28
  -1  -6   7    7.93   14.04
  -1  -6   7    3.38    8.34
   1   6  -7    4.99   11.22
   1   6  -7   -3.67    9.65
  -1   6   7    4.68   15.91
  -1   6   7   21.13   12.39
   1  -6  -6  478.90   39.81
   1  -6  -6  427.80   36.92
  -1  -6   6  448.50   37.33
  -1  -6   6  438.10   38.31
   1   6  -6  483.00   40.23
   1   6  -6  421.60   36.50
  -1   6   6  452.00   38.72
  -1   6   6  485.50   41.62
   1  -6  -5   11.86    7.45
   1  -6  -5   35.35    9.97
  -1  -6   5   21.86    6.98
  -1  -6   5   15.23   10.31
   1   6  -5   19.05    7.22
   1   6  -5   20.39    5.80
  -1   6   5   20.90    7.84
  -1   6   5   29.76   10.53
   1  -6  -4 2685.00  215.40
   1  -6  -4 2686.00  215.40
  -1  -6   4 2826.00  226.40
  -1  -6   4 2462.00  197.70
   1   6  -4 3119.00  250.00
   1   6  -4 2613.00  209.40
  -1   6   4 2588.00  207.80
  -1   6   4 3350.00  268.60
   1  -6  -3   27.38    5.64
   1  -6  -3   25.49    5.38
  -1  -6   3   22.90    4.25
  -1  -6   3   18.90    6.02
   1   6  -3   37.50    6.15
   1   6  -3   31.54    4.86
  -1   6   3   28.56    6.18
  -1   6   3   29.40    6.98
   1  -6  -2  253.90   21.42
   1  -6  -2  231.60   20.14
  -1  -6   2  243.50   19.96
  -1  -6   2  250.20   20.84
   1   6  -2  261.30   21.73
   1   6  -2  237.90   19.53
  -1   6   2  286.00   23.93
  -1   6   2  244.30   21.20
   1  -6  -1   25.11    5.92
   1  -6  -1   20.74    3.83
  -1  -6   1   27.25    3.82
  -1  -6   1   26.80    2.86
   1   6  -1   24.27    2.84
   1   6  -1   32.61    3.82
  -1   6   1   25.24    6.08
  -1   6   1   27.32    4.36
   1  -6   0  367.60   30.61
   1  -6   0  357.90   29.23
  -1  -6   0  408.60   32.92
  -1  -6   0  384.60   31.14
   1   6   0  375.50   30.33
   1   6   0  365.40   29.68
  -1   6   0  453.70   36.85
  -1   6   0  383.60   31.87
   1  -6   1 1706.00  137.10
   1  -6   1 1780.00  142.70
  -1  -6  -1 1765.00  141.50
  -1  -6  -1 1869.00  149.70
   1   6   1 1458.00  116.90
   1   6   1 1855.00  148.60
  -1   6  -1 1578.00  126.80
  -1   6  -1 1870.00  149.80
   1  -6   2  338.30   27.86
   1  -6   2  426.80   35.71
  -1  -6  -2  306.10   25.62
  -1  -6  -2  359.80   29.46
   1   6   2  345.90   28.97
   1   6   2  342.00   28.26
  -1   6  -2  326.50   27.11
  -1   6  -2  279.70   23.79
   1  -6   3  365.70   30.40
   1  -6   3  382.90   32.66
  -1  -6  -3  389.10   32.14
  -1  -6  -3  364.80   31.18
   1   6   3  383.50   32.65
   1   6   3  394.00   32.50
  -1   6  -3  387.40   32.37
  -1   6  -3  377.00   32.27
   1  -6   4  708.50   57.69
   1  -6   4  703.40   58.09
  -1  -6  -4  685.60   56.71
  -1  -6  -4  527.60   43.55
   1   6   4  663.60   54.83
   1   6   4  630.00   51.62
  -1   6  -4  662.70   54.17
  -1   6  -4  709.00   58.50
   1  -6   5   10.86   12.64
   1  -6   5   18.10    6.21
  -1  -6  -5   15.39    6.13
  -1  -6  -5  -13.70   10.69
   1   6   5   20.00   11.91
   1   6   5   18.35    8.39
  -1   6  -5   15.72    9.85
  -1   6  -5    8.90    8.31
   1  -6   6  177.90   21.80
  -1  -6  -6  182.30   18.46
  -1  -6  -6  191.30   18.66
   1   6   6  154.50   20.00
  -1   6  -6  138.10   15.83
  -1   6  -6  181.80   18.76
   1  -6   7  169.50   21.50
   1  -6   7  123.50   13.79
  -1  -6  -7  124.80   16.47
  -1  -6  -7  102.40   12.74
   1   6   7  157.70   20.71
   1   6   7  150.30   16.17
  -1   6  -7  132.70   17.45
  -1   6  -7  176.00   19.74
   1  -6   8  417.80   40.67
   1  -6   8  532.40   45.91
  -1  -6  -8  395.60   35.43
  -1  -6  -8  472.70   41.63
   1   6   8  436.80   37.85
   1   6   8  412.50   39.97
  -1   6  -8  504.20   44.92
  -1   6  -8  456.00   40.28
   1  -6   9   24.61   16.97
   1  -6   9   10.82   10.38
  -1  -6  -9   11.28   12.25
  -1  -6  -9   37.20   18.65
   1   6   9    1.19   23.45
   1   6   9   21.69   16.18
  -1   6  -9   -3.60   16.65
  -1   6  -9   33.47   14.34
   1  -6  10  152.30   17.55
   1  -6  10  140.20   26.52
  -1  -6 -10  136.60   20.39
  -1  -6 -10  144.20   19.93
   1   6  10  164.70   29.98
   1   6  10  147.40   18.55
  -1   6 -10  115.70   17.19
  -1   6 -10  166.30   25.80
   1  -6  11    4.65   12.80
   1  -6  11    9.48   23.62
  -1  -6 -11   -0.84   21.66
  -1  -6 -11  -15.70   13.64
   1   6  11    8.62   24.72
   1   6  11   15.29   20.93
  -1   6 -11  -20.04   15.71
  -1   6 -11  -10.56   21.90
   1  -6  12   -1.29   15.78
   1  -6  12  -22.11   34.92
  -1  -6 -12   14.81   21.68
  -1  -6 -12    7.41   25.04
   1   6  12  -38.48   22.98
   1   6  12   19.85   32.71
  -1   6 -12   15.11   20.55
  -1   6 -12  -10.44   19.72
   1  -6  13   15.95   27.02
   1  -6  13   30.56   24.46
  -1  -6 -13   13.66   18.52
  -1  -6 -13  -16.83   24.85
   1   6  13   24.76   25.63
   1   6  13   -0.93   22.06
  -1   6 -13    6.34   22.40
  -1   6 -13   -6.12   16.87
   1  -6  14   -8.26   34.69
   1  -6  14  -22.56   44.11
  -1  -6 -14    5.27   25.62
  -1  -6 -14   18.96   25.87
   1   6  14   32.23   34.78
   1   6  14   32.03   24.30
  -1   6 -14   27.63   29.51
  -1   6 -14   42.51   31.61
   1  -7 -14   24.70   26.09
   1  -7 -14    5.10   19.39
  -1  -7  14    9.76   30.46
  -1  -7  14    3.74   30.70
   1   7 -14  -15.16   23.57
   1   7 -14    7.95   28.03
  -1   7  14   -6.19   31.31
  -1   7  14   11.75   30.33
   1  -7 -13   84.66   19.63
   1  -7 -13  100.10   27.45
  -1  -7  13  125.50   35.83
  -1  -7  13  118.60   21.36
   1   7 -13  106.20   19.98
   1   7 -13  142.50   31.21
  -1   7  13   77.42   27.22
  -1   7  13  114.60   30.69
   1  -7 -12   26.07   14.23
   1  -7 -12   28.69   23.85
  -1  -7  12   32.68   32.01
  -1  -7  12   30.99   21.48
   1   7 -12    7.51   14.91
   1   7 -12   38.93   19.25
  -1   7  12   33.63   19.49
  -1   7  12   -0.72   26.46
   1  -7 -11   26.23   14.57
   1  -7 -11   22.27   19.92
  -1  -7  11    0.86   15.33
  -1  -7  11   48.67   24.71
   1   7 -11   17.90   20.17
   1   7 -11    9.36   17.52
  -1   7  11   21.12   18.32
  -1   7  11   17.31   17.32
   1  -7 -10   77.35   20.03
   1  -7 -10   60.17   12.78
  -1  -7  10   77.04   15.89
  -1  -7  10   37.90   25.91
   1   7 -10   51.13   16.03
   1   7 -10   30.84   19.57
  -1   7  10   52.96   17.08
  -1   7  10   98.68   17.18
   1  -7  -9  176.60   22.30
   1  -7  -9  258.10   25.54
  -1  -7   9  184.00   21.04
  -1  -7   9  213.40   30.39
   1   7  -9  201.20   21.62
   1   7  -9  172.80   18.65
  -1   7   9  260.20   28.98
  -1   7   9  222.30   29.26
   1  -7  -8  171.00   21.32
   1  -7  -8  147.70   15.97
  -1  -7   8  112.60   14.98
  -1  -7   8  110.90   20.26
   1   7  -8  101.20   13.29
   1   7  -8  150.50   18.06
  -1   7   8  151.50   19.98
  -1   7   8  146.00   19.56
   1  -7  -7    5.30   12.00
   1  -7  -7   13.40    7.85
  -1  -7   7   38.28   13.90
  -1  -7   7   39.13   10.55
   1   7  -7   15.76    9.12
   1   7  -7   30.36   10.55
  -1   7   7    7.29   12.92
  -1   7   7   -7.16   12.56
   1  -7  -6   41.76   11.45
   1  -7  -6    3.00    7.50
  -1  -7   6   28.15   11.95
  -1  -7   6    6.48    7.26
   1   7  -6   24.68   12.54
   1   7  -6   12.26    8.28
  -1   7   6   15.41   11.33
  -1   7   6   12.48    8.49
   1  -7  -5 1003.00   81.76
   1  -7  -5 1168.00   94.60
  -1  -7   5 1117.00   90.27
  -1  -7   5 1006.00   82.26
   1   7  -5  976.20   79.58
   1   7  -5  929.30   75.38
  -1   7   5  918.30   75.15
  -1   7   5 1022.00   83.55
   1  -7  -4   28.62    6.47
   1  -7  -4   42.96    8.63
  -1  -7   4   38.89    6.93
  -1  -7   4   42.21    8.50
   1   7  -4   30.84    6.28
   1   7  -4   42.65    7.67
  -1   7   4   52.66    9.71
  -1   7   4   18.27    6.26
   1  -7  -3 1155.00   93.07
   1  -7  -3 1030.00   83.28
  -1  -7   3 1114.00   89.66
  -1  -7   3 1062.00   85.69
   1   7  -3 1122.00   90.46
   1   7  -3 1129.00   90.76
  -1   7   3 1356.00  109.40
  -1   7   3 1142.00   92.20
   1  -7  -2  186.70   16.38
   1  -7  -2  193.00   17.02
  -1  -7   2  177.20   14.75
  -1  -7   2  192.20   16.38
   1   7  -2  203.80   16.89
   1   7  -2  185.40   15.79
  -1   7   2  188.50   17.56
  -1   7   2  182.00   15.86
   1  -7  -1 1250.00  100.90
   1  -7  -1 1139.00   91.52
  -1  -7   1 1092.00   87.71
  -1  -7   1 1132.00   90.69
   1   7  -1 1142.00   91.64
   1   7  -1 1152.00   92.32
  -1   7   1 1157.00   92.92
  -1   7   1 1334.00  107.60
   1  -7   0  641.70   51.90
   1  -7   0  760.80   61.94
  -1  -7   0  707.00   56.93
  -1  -7   0  641.90   51.60
   1   7   0  800.70   64.28
   1   7   0  740.30   59.76
  -1   7   0  748.30   60.90
  -1   7   0  743.00   59.96
   1  -7   1  745.40   60.16
   1  -7   1  770.50   62.75
  -1  -7  -1  801.10   64.52
  -1  -7  -1  927.10   74.58
   1   7   1 1031.00   82.91
  -1   7  -1  883.90   71.62
  -1   7  -1  971.80   78.23
   1  -7   2  596.10   48.50
   1  -7   2  549.90   45.24
  -1  -7  -2  558.50   45.68
  -1  -7  -2  642.80   52.04
   1   7   2  627.60   51.17
   1   7   2  624.80   50.66
  -1   7  -2  524.70   43.20
  -1   7  -2  545.00   44.38
   1  -7   3  203.30   18.07
  -1  -7  -3  219.40   19.63
  -1  -7  -3  199.10   17.28
   1   7   3  207.80   19.25
   1   7   3  212.90   18.78
  -1   7  -3  180.70   16.36
  -1   7  -3  179.00   17.53
   1  -7   4   69.08    9.47
   1  -7   4   83.17   12.98
  -1  -7  -4   71.79   11.42
  -1  -7  -4   54.00    7.11
   1   7   4   57.14   11.58
   1   7   4   77.88   10.12
  -1   7  -4   68.97   10.91
  -1   7  -4   78.37    9.17
   1  -7   5  155.30   17.60
   1  -7   5  107.90   11.35
  -1  -7  -5  100.90   13.87
  -1  -7  -5  115.30   11.89
   1   7   5  122.70   12.37
   1   7   5  101.20   14.82
  -1   7  -5  110.10   12.25
  -1   7  -5  101.00   12.81
   1  -7   6  374.30   34.94
  -1  -7  -6  474.80   40.28
  -1  -7  -6  445.90   38.24
   1   7   6  444.40   37.53
   1   7   6  481.30   42.79
  -1   7  -6  463.80   40.63
  -1   7  -6  452.70   38.85
   1  -7   7   17.70   12.70
   1  -7   7   25.14   11.36
  -1  -7  -7   22.68   14.29
  -1  -7  -7    5.86   12.57
   1   7   7    9.15   17.68
   1   7   7   23.07   11.21
  -1   7  -7    7.78   11.43
  -1   7  -7   11.71   14.07
   1  -7   8   46.77   13.43
   1  -7   8   36.10   17.99
  -1  -7  -8   46.71   13.90
  -1  -7  -8   57.90   17.61
   1   7   8   63.79   14.87
   1   7   8   69.80   21.14
  -1   7  -8   62.50   14.20
  -1   7  -8   62.43   22.13
   1  -7   9  326.90   37.83
  -1  -7  -9  369.70   35.32
  -1  -7  -9  424.40   37.19
   1   7   9  406.20   36.87
   1   7   9  520.50   48.07
  -1   7  -9  453.50   40.54
  -1   7  -9  445.40   40.03
   1  -7  10   29.85   11.22
   1  -7  10    8.71   28.21
  -1  -7 -10   55.84   17.82
  -1  -7 -10   19.24   18.71
   1   7  10   45.44   26.70
   1   7  10   48.51   18.86
  -1   7 -10   29.62   17.68
  -1   7 -10   23.49   18.68
   1  -7  11    3.13   12.48
   1  -7  11   13.47   31.15
  -1  -7 -11   10.04   13.85
  -1  -7 -11   16.13   17.92
   1   7  11   32.56   19.44
   1   7  11   27.05   22.35
  -1   7 -11    1.87   22.75
  -1   7 -11   36.15   18.39
   1  -7  12   36.81   16.25
   1  -7  12   22.07   34.18
  -1  -7 -12    8.43   26.62
  -1  -7 -12   21.21   21.65
   1   7  12   17.91   26.58
   1   7  12   32.15   33.32
  -1   7 -12   33.55   18.96
  -1   7 -12   19.30   23.52
   1  -7  13   46.84   27.47
   1  -7  13   75.20   20.37
  -1  -7 -13   83.42   19.33
  -1  -7 -13   43.80   25.00
   1   7  13  107.70   24.19
   1   7  13   44.18   26.75
  -1   7 -13   83.21   23.88
  -1   7 -13   90.60   19.76
   1  -7  14  -17.08   43.46
   1  -7  14  -76.38   32.88
  -1  -7 -14   19.60   26.11
  -1  -7 -14  -64.87   32.94
   1   7  14  -42.75   25.00
   1   7  14   -4.36   40.82
  -1   7 -14    4.51   30.13
  -1   7 -14    9.58   24.58
   1  -8 -14    3.39   24.10
   1  -8 -14    0.34   19.73
  -1  -8  14    7.87   31.48
  -1  -8  14   -0.96   42.68
   1   8 -14   54.74   27.49
   1   8 -14   -3.31   23.44
  -1   8  14   16.47   32.60
  -1   8  14   39.98   27.26
   1  -8 -13   34.67   26.39
   1  -8 -13   13.53   17.56
  -1  -8  13   -4.68   34.89
  -1  -8  13  -10.08   18.57
   1   8 -13   40.65   29.87
   1   8 -13   11.22   14.82
  -1   8  13   19.82   27.08
  -1   8  13   16.81   29.42
   1  -8 -12   11.85   14.25
   1  -8 -12  -21.59   25.55
  -1  -8  12   13.29   20.98
  -1  -8  12   -6.84   23.45
   1   8 -12   17.27   20.18
   1   8 -12   15.88   18.41
  -1   8  12    8.51   26.14
  -1   8  12   -1.12   19.73
   1  -8 -11  188.90   21.00
   1  -8 -11  159.40   26.88
  -1  -8  11  142.50   30.82
  -1  -8  11  231.50   26.97
   1   8 -11  191.30   21.71
   1   8 -11  185.30   25.43
  -1   8  11  168.20   24.72
   1  -8 -10   21.01   13.71
   1  -8 -10   23.47   19.87
  -1  -8  10    4.61   28.30
  -1  -8  10   14.46   12.06
   1   8 -10  -15.07   19.73
   1   8 -10   26.41   14.14
  -1   8  10   50.48   20.69
  -1   8  10  -13.22   22.06
   1  -8  -9   22.98   16.09
   1  -8  -9   11.62   13.02
  -1  -8   9   22.59   11.37
  -1  -8   9  -22.53   27.09
   1   8  -9   21.92   12.04
   1   8  -9   21.20   16.84
  -1   8   9   39.91   20.63
  -1   8   9   20.13   17.12
   1  -8  -8   45.47   13.09
  -1  -8   8   27.08   18.44
  -1  -8   8   34.71    8.92
   1   8  -8   10.63   11.25
   1   8  -8    6.20   14.52
  -1   8   8   16.54   18.01
   1  -8  -7  649.70   54.94
   1  -8  -7  619.80   51.83
  -1  -8   7  625.80   53.81
  -1  -8   7  638.10   52.98
   1   8  -7  687.40   57.44
   1   8  -7  578.70   48.36
  -1   8   7  616.40   52.46
  -1   8   7  704.00   59.26
   1  -8  -6   13.86   11.30
   1  -8  -6   13.16    9.14
  -1  -8   6   -0.42   12.02
  -1  -8   6    4.37    7.14
   1   8  -6    8.24    8.28
   1   8  -6    3.30   10.39
  -1   8   6    6.70   12.04
  -1   8   6   13.12   11.57
   1  -8  -5   18.68    7.29
   1  -8  -5    9.75    8.17
  -1  -8   5    0.21    9.33
  -1  -8   5   15.46    5.77
   1   8  -5   10.20    6.94
   1   8  -5    8.59    6.51
  -1   8   5   -4.42    9.98
  -1   8   5   -1.32    9.59
   1  -8  -4   28.50    6.45
   1  -8  -4   25.30    7.28
  -1  -8   4   22.36    7.78
  -1  -8   4   20.82    5.10
   1   8  -4   28.01    6.56
   1   8  -4   22.89    5.68
  -1   8   4   20.67    8.10
  -1   8   4   36.83    8.43
   1  -8  -3 2400.00  192.50
   1  -8  -3 2577.00  206.70
  -1  -8   3 2657.00  212.70
  -1  -8   3 2661.00  213.30
   1   8  -3 2495.00  200.00
   1   8  -3 2683.00  214.90
  -1   8   3 2883.00  231.40
  -1   8   3 2343.00  188.00
   1  -8  -2 2808.00  224.80
   1  -8  -2 3064.00  245.50
  -1  -8   2 2855.00  228.40
  -1  -8   2 2694.00  215.70
   1   8  -2 2593.00  207.60
   1   8  -2 3041.00  243.30
  -1   8   2 2675.00  214.60
  -1   8   2 2852.00  228.40
   1  -8  -1 4641.00  371.60
   1  -8  -1 3994.00  319.50
  -1  -8   1 3727.00  297.90
  -1  -8   1 3879.00  310.30
   1   8  -1 3952.00  316.10
   1   8  -1 3639.00  290.90
  -1   8   1 4172.00  333.60
  -1   8   1 3283.00  263.20
   1  -8   0   19.97    6.77
   1  -8   0   19.24    4.48
   1  -8   0   18.48    6.35
  -1  -8   0   11.73    2.99
  -1  -8   0   19.78    4.46
   1   8   0   26.34    5.09
   1   8   0   13.95    3.31
  -1   8   0   17.69    4.36
  -1   8   0    6.58    6.44
   1  -8   1   98.87   11.14
   1  -8   1  131.40   11.60
  -1  -8  -1  125.50   11.06
   1   8   1  126.50   11.35
   1   8   1  114.10   10.78
  -1   8  -1  125.30   11.45
  -1   8  -1  106.10   10.96
   1  -8   2  176.70   16.84
   1  -8   2  205.40   17.78
  -1  -8  -2  205.80   18.06
  -1  -8  -2  226.60   19.28
   1   8   2  222.70   19.25
   1   8   2  172.80   15.65
  -1   8  -2  208.20   18.65
  -1   8  -2  176.90   15.52
   1  -8   3 3642.00  291.60
   1  -8   3 3562.00  285.70
  -1  -8  -3 4178.00  334.60
  -1  -8  -3 4220.00  337.70
   1   8   3 4328.00  346.40
   1   8   3 3984.00  319.10
  -1   8  -3 4246.00  339.90
  -1   8  -3 4438.00  355.50
   1  -8   4  193.80   19.83
   1  -8   4  226.80   20.42
  -1  -8  -4  225.30   20.87
  -1  -8  -4  206.10   18.51
   1   8   4  147.10   14.63
   1   8   4  143.70   15.35
  -1   8  -4  221.50   21.31
  -1   8  -4  150.50   14.72
   1  -8   5  479.60   39.73
  -1  -8  -5  534.60   44.11
  -1  -8  -5  529.90   44.82
   1   8   5  462.90   40.27
   1   8   5  433.50   36.75
  -1   8  -5  408.40   34.85
  -1   8  -5  442.70   38.19
   1  -8   6   18.15    9.97
   1  -8   6   14.61   14.04
  -1  -8  -6   19.00    9.55
  -1  -8  -6   13.12    9.27
   1   8   6   10.66    8.89
   1   8   6   10.81   11.67
  -1   8  -6    9.90    7.95
  -1   8  -6   13.11   13.74
   1  -8   7  507.20   45.54
   1  -8   7  480.30   40.49
  -1  -8  -7  560.00   48.57
  -1  -8  -7  482.60   41.10
   1   8   7  572.80   48.89
   1   8   7  498.50   43.98
  -1   8  -7  523.30   45.16
  -1   8  -7  439.80   38.07
   1  -8   8   62.34   23.03
   1  -8   8   25.29    9.59
  -1  -8  -8   48.76   10.91
  -1  -8  -8   34.18   15.55
   1   8   8   32.33   13.97
   1   8   8   45.93   15.31
  -1   8  -8   44.36   11.71
  -1   8  -8   37.72   14.59
   1  -8   9   25.52   15.02
   1  -8   9   18.47   22.08
  -1  -8  -9   -1.91   14.27
  -1  -8  -9   22.09   17.65
   1   8   9   23.25   16.18
   1   8   9   26.37   18.71
  -1   8  -9  -12.49   17.14
  -1   8  -9    4.63   14.50
   1  -8  10   63.49   12.35
   1  -8  10  117.80   28.22
  -1  -8 -10  113.60   23.43
  -1  -8 -10  100.20   19.67
   1   8  10   92.89   21.96
   1   8  10  144.00   29.80
  -1   8 -10  105.80   18.23
  -1   8 -10  119.20   20.61
   1  -8  11  174.20   34.73
   1  -8  11  171.40   19.71
  -1  -8 -11  160.10   20.24
  -1  -8 -11  117.60   20.22
   1   8  11  159.50   30.99
   1   8  11  149.20   21.16
  -1   8 -11  189.80   23.48
  -1   8 -11  151.80   26.21
   1  -8  12  -13.40   15.15
   1  -8  12   10.17   29.71
  -1  -8 -12  -20.13   26.27
  -1  -8 -12    6.46   21.89
   1   8  12    7.48   26.33
   1   8  12   39.13   33.52
  -1   8 -12   -1.08   14.86
  -1   8 -12    9.77   26.99
   1  -8  13   29.56   19.46
   1  -8  13    0.74   26.88
  -1  -8 -13    2.14   17.64
  -1  -8 -13    4.73   24.04
   1   8  13   18.65   26.33
   1   8  13   24.16   22.85
  -1   8 -13   32.93   27.77
  -1   8 -13  -10.57   22.74
   1  -8  14   27.40   24.32
   1   8  14   15.15   25.70
   1   8  14  -45.52   40.82
   1  -9 -14   18.36   20.40
   1  -9 -14   20.77   24.06
  -1  -9  14   21.68   26.34
  -1  -9  14  -24.31   46.18
   1   9 -14   13.45   21.26
   1   9 -14    8.03   30.29
  -1   9  14   11.98   27.35
  -1   9  14   61.73   32.88
   1  -9 -13   23.21   26.72
   1  -9 -13  -16.74   17.98
  -1  -9  13   29.70   19.82
  -1  -9  13  -13.45   26.63
   1   9 -13   25.16   19.72
   1   9 -13   -4.70   27.90
  -1   9  13   30.53   30.03
  -1   9  13   10.07   29.70
   1  -9 -12   76.20   25.54
   1  -9 -12  114.90   18.79
  -1  -9  12   82.87   35.70
  -1  -9  12   89.37   24.67
   1   9 -12  113.10   20.97
   1   9 -12   84.30   18.31
  -1   9  12   49.74   25.20
  -1   9  12   81.34   22.81
   1  -9 -11   65.80   14.18
   1  -9 -11   81.69   23.23
  -1  -9  11   89.62   20.68
  -1  -9  11   74.97   22.64
   1   9 -11   71.97   19.36
   1   9 -11   81.78   20.21
  -1   9  11   65.88   26.00
  -1   9  11  129.70   22.66
   1  -9 -10  456.30   40.85
   1  -9 -10  438.70   39.40
  -1  -9  10  469.40   42.12
  -1  -9  10  438.70   44.97
   1   9 -10  358.80   36.01
   1   9 -10  373.00   35.63
  -1   9  10  339.20   35.79
  -1   9  10  421.40   42.77
   1  -9  -9   24.70   17.23
   1  -9  -9   12.12    9.33
  -1  -9   9   31.22   14.11
  -1  -9   9   33.20   21.82
   1   9  -9    8.31   13.90
   1   9  -9   15.04   16.81
  -1   9   9   22.71   19.77
  -1   9   9   25.53   16.86
   1  -9  -8  151.90   21.30
   1  -9  -8   83.69   14.10
  -1  -9   8  109.90   15.68
  -1  -9   8  108.20   20.84
   1   9  -8  110.40   14.88
   1   9  -8  169.20   18.94
  -1   9   8  140.70   21.30
  -1   9   8  136.60   18.66
   1  -9  -7   -3.03   11.91
   1  -9  -7    2.60    8.98
  -1  -9   7   15.40    8.51
  -1  -9   7   19.68   15.13
   1   9  -7    1.06    9.63
   1   9  -7    8.44   13.80
  -1   9   7   10.94   11.26
  -1   9   7   24.93   14.61
   1  -9  -6  249.30   22.91
   1  -9  -6  345.60   31.16
  -1  -9   6  281.90   24.80
  -1  -9   6  241.30   23.95
   1   9  -6  295.10   25.90
   1   9  -6  324.90   29.35
  -1   9   6  365.10   33.38
  -1   9   6  294.40   28.11
   1  -9  -5  248.80   22.76
   1  -9  -5  241.80   22.04
  -1  -9   5  249.90   22.02
  -1  -9   5  239.40   22.91
   1   9  -5  234.80   20.78
   1   9  -5  230.40   21.71
  -1   9   5  237.80   22.34
  -1   9   5  235.70   22.64
   1  -9  -4  710.10   58.34
   1  -9  -4  731.10   59.65
  -1  -9   4  774.80   62.76
  -1  -9   4  746.60   61.20
   1   9  -4  636.60   51.83
   1   9  -4  762.30   62.21
  -1   9   4  840.30   68.60
  -1   9   4  807.50   66.43
   1  -9  -3  302.90   25.99
   1  -9  -3  267.80   23.37
  -1  -9   3  291.30   25.05
  -1  -9   3  277.70   23.19
   1   9  -3  267.30   22.90
   1   9  -3  321.70   26.59
  -1   9   3  333.90   28.36
  -1   9   3  280.00   25.19
   1  -9  -2 1799.00  144.40
   1  -9  -2 1574.00  126.70
  -1  -9   2 1798.00  144.40
  -1  -9   2 1711.00  137.10
   1   9  -2 1779.00  142.70
   1   9  -2 1786.00  143.10
  -1   9   2 1626.00  131.10
  -1   9   2 2020.00  162.00
   1  -9  -1 4067.00  325.40
  -1  -9   1 4857.00  388.20
  -1  -9   1 4781.00  382.40
   1   9  -1 5248.00  419.50
   1   9  -1 5164.00  413.00
  -1   9   1 5599.00  447.70
  -1   9   1 5614.00  449.40
   1  -9   0   16.03    4.24
   1  -9   0   28.01    7.07
   1  -9   0   29.86    6.69
  -1  -9   0   21.78    3.39
  -1  -9   0   22.51    4.96
   1   9   0   24.24    4.28
   1   9   0   21.71    5.69
  -1   9   0   29.59    7.06
  -1   9   0   22.23    4.69
   1  -9   1  344.90   28.46
  -1  -9  -1  283.10   23.61
  -1  -9  -1  369.60   30.29
   1   9   1  319.40   26.60
   1   9   1  329.70   27.34
  -1   9  -1  313.50   26.75
  -1   9  -1  350.70   29.10
   1  -9   2 4574.00  366.40
   1  -9   2 3539.00  283.40
  -1  -9  -2 4747.00  379.70
  -1  -9  -2 4723.00  377.90
   1   9   2 4191.00  335.40
   1   9   2 4134.00  330.90
  -1   9  -2 4811.00  385.10
  -1   9  -2 3435.00  275.00
   1  -9   3  126.10   12.49
   1  -9   3  152.10   15.75
  -1  -9  -3  153.20   14.49
   1   9   3  157.20   15.42
   1   9   3  115.90   12.06
  -1   9  -3  116.60   11.45
  -1   9  -3  159.80   16.40
   1  -9   4   12.67   10.46
   1  -9   4   11.02    6.09
  -1  -9  -4    9.78    6.97
  -1  -9  -4   11.55    8.14
   1   9   4   10.64    8.32
   1   9   4    2.42    7.51
  -1   9  -4    9.33    7.16
  -1   9  -4    1.59    9.98
   1  -9   5  292.30   25.15
   1  -9   5  326.60   30.40
  -1  -9  -5  323.80   29.34
  -1  -9  -5  272.20   23.99
   1   9   5  322.10   30.19
   1   9   5  307.70   27.11
  -1   9  -5  246.60   22.49
  -1   9  -5  272.90   25.67
   1  -9   6  417.10   38.00
   1  -9   6  389.90   33.68
  -1  -9  -6  486.90   41.41
  -1  -9  -6  437.20   36.87
   1   9   6  378.30   34.81
   1   9   6  501.10   42.58
  -1   9  -6  377.30   33.24
  -1   9  -6  438.80   37.40
   1  -9   7   60.62   12.52
   1  -9   7   87.69   20.03
  -1  -9  -7   79.16   15.62
  -1  -9  -7  112.30   17.05
   1   9   7   48.56   13.36
   1   9   7   91.14   20.00
  -1   9  -7   78.00   12.25
  -1   9  -7   94.75   17.03
   1  -9   8  110.60   16.39
   1  -9   8  192.40   28.90
  -1  -9  -8  182.60   21.41
  -1  -9  -8  128.70   18.28
   1   9   8  148.80   18.08
   1   9   8  124.10   22.73
  -1   9  -8  161.70   20.58
  -1   9  -8  149.50   19.04
   1  -9   9   15.49   14.68
   1  -9   9   27.38   25.17
  -1  -9  -9   -0.90   14.84
  -1  -9  -9   -1.04   17.99
   1   9   9  -27.38   21.39
   1   9   9   18.43   16.07
  -1   9  -9   -9.53   14.81
  -1   9  -9    7.57   19.67
   1  -9  10  206.00   31.00
   1  -9  10  241.20   24.27
  -1  -9 -10  208.00   23.51
  -1  -9 -10  297.40   30.52
   1   9  10  227.40   25.33
   1   9  10  178.60   31.23
  -1   9 -10  198.60   24.16
  -1   9 -10  245.40   27.16
   1  -9  11   -2.77   12.03
   1  -9  11  -18.32   22.73
  -1  -9 -11   -1.59   20.18
  -1  -9 -11   -5.58   13.82
   1   9  11  -20.50   28.45
   1   9  11  -16.20   18.37
  -1   9 -11   10.70   13.06
  -1   9 -11   10.77   22.56
   1  -9  12  185.50   22.46
   1  -9  12  170.50   29.88
  -1  -9 -12  151.80   29.24
  -1  -9 -12  199.90   28.30
   1   9  12  181.20   32.48
   1   9  12  212.80   36.24
  -1   9 -12  169.20   23.20
  -1   9 -12  165.70   32.71
   1  -9  13   33.53   20.71
   1  -9  13   38.81   31.42
  -1  -9 -13  -30.97   26.45
  -1  -9 -13   26.35   18.06
   1   9  13    4.88   23.31
   1   9  13    0.06   30.52
  -1   9 -13   29.59   34.22
  -1   9 -13    1.32   26.78
   1 -10 -14   17.76   24.21
   1 -10 -14   52.66   27.55
  -1 -10  14   81.92   43.50
  -1 -10  14   52.75   22.98
   1  10 -14   60.18   37.91
   1  10 -14   66.38   22.96
  -1  10  14   53.25   34.19
  -1  10  14  101.20   36.14
   1 -10 -13    0.63   26.85
   1 -10 -13    5.31   22.82
  -1 -10  13   12.57   25.47
  -1 -10  13   14.69   27.72
   1  10 -13   25.79   31.33
   1  10 -13    3.94   21.59
  -1  10  13    4.72   30.04
  -1  10  13   12.50   32.32
   1 -10 -12   34.50   26.64
   1 -10 -12   34.75   16.76
  -1 -10  12    9.20   30.96
  -1 -10  12   44.14   23.03
   1  10 -12   41.49   20.06
   1  10 -12   65.50   19.78
  -1  10  12    5.78   21.72
  -1  10  12   47.07   27.93
   1 -10 -11   29.72   18.21
   1 -10 -11   39.21   13.59
  -1 -10  11   33.33   19.14
  -1 -10  11   21.17   30.47
   1  10 -11   41.86   19.78
   1  10 -11    5.58   12.81
  -1  10  11   26.45   22.90
  -1  10  11   12.10   26.66
   1 -10 -10  143.00   20.01
   1 -10 -10  150.90   22.67
  -1 -10  10  121.60   30.59
  -1 -10  10  124.70   20.17
   1  10 -10  143.10   21.43
   1  10 -10  109.10   17.33
  -1  10  10  129.80   19.77
  -1  10  10   78.47   24.42
   1 -10  -9   18.05   12.15
   1 -10  -9    9.10   11.63
  -1 -10   9   24.16   23.29
  -1 -10   9   46.52   15.96
   1  10  -9   23.30   15.13
   1  10  -9   35.81   14.75
  -1  10   9    8.24   20.78
  -1  10   9   31.78   19.93
   1 -10  -8    0.70   10.37
   1 -10  -8   18.32   14.86
  -1 -10   8   29.61   10.45
  -1 -10   8   -1.78   18.24
   1  10  -8   14.33   15.29
   1  10  -8   10.68   11.91
  -1  10   8  -12.63   12.51
  -1  10   8   11.35   16.51
   1 -10  -7  190.20   19.05
   1 -10  -7  170.00   18.02
  -1 -10   7  175.50   20.49
  -1 -10   7  160.40   16.89
   1  10  -7  164.60   17.50
   1  10  -7  165.00   17.74
  -1  10   7  144.10   19.18
  -1  10   7  154.70   19.70
   1 -10  -6  490.80   41.09
   1 -10  -6  372.90   33.17
  -1 -10   6  397.20   33.70
  -1 -10   6  357.10   31.90
   1  10  -6  445.20   37.74
   1  10  -6  471.70   40.64
  -1  10   6  510.50   43.17
  -1  10   6  439.50   38.96
   1 -10  -5   38.59   10.39
   1 -10  -5   44.36    8.50
  -1 -10   5   49.25    8.24
  -1 -10   5   53.38   11.57
   1  10  -5   29.81    8.65
   1  10  -5   53.31    8.01
  -1  10   5   54.19   11.86
  -1  10   5   30.14   10.36
   1 -10  -4 3538.00  283.50
   1 -10  -4 3506.00  281.00
  -1 -10   4 3572.00  286.50
  -1 -10   4 3458.00  276.90
   1  10  -4 3254.00  260.80
   1  10  -4 3313.00  265.40
  -1  10   4 3401.00  272.90
  -1  10   4 3060.00  245.50
   1 -10  -3  683.90   55.75
   1 -10  -3  580.40   47.82
  -1 -10   3  656.60   53.32
  -1 -10   3  579.40   47.72
   1  10  -3  607.40   49.32
   1  10  -3  580.80   47.60
  -1  10   3  605.70   50.27
  -1  10   3  609.10   49.95
   1 -10  -2  798.30   65.21
   1 -10  -2  890.90   72.08
  -1 -10   2  893.20   71.84
  -1 -10   2  871.20   70.60
   1  10  -2  959.40   77.18
   1  10  -2  911.10   73.54
  -1  10   2  864.50   70.04
  -1  10   2  904.10   73.69
   1 -10  -1  157.90   15.91
   1 -10  -1  134.80   12.15
  -1 -10   1  177.00   15.90
  -1 -10   1  156.00   13.27
  -1 -10   1  160.00   14.41
   1  10  -1  172.30   14.53
   1  10  -1  180.00   15.74
  -1  10   1  140.10   12.79
  -1  10   1  198.20   18.60
   1 -10   0 3912.00  313.40
   1 -10   0 3299.00  264.60
  -1 -10   0 4182.00  334.60
   1  10   0 4784.00  382.80
   1  10   0 4860.00  388.60
  -1  10   0 4597.00  368.20
  -1  10   0 5569.00  445.30
   1 -10   1  560.60   45.62
   1 -10   1  650.80   53.68
  -1 -10  -1  549.80   44.65
  -1 -10  -1  581.40   47.31
   1  10   1  497.30   40.84
   1  10   1  569.90   46.31
  -1  10  -1  466.10   38.94
  -1  10  -1  478.20   39.12
   1 -10   2  359.20   29.92
   1 -10   2  376.30   32.18
  -1 -10  -2  377.10   31.39
  -1 -10  -2  294.80   24.97
   1  10   2  353.60   29.69
   1  10   2  365.20   30.58
  -1  10  -2  347.80   29.77
   1 -10   3  899.80   72.85
   1 -10   3  829.90   68.19
  -1 -10  -3  823.60   66.79
  -1 -10  -3  789.30   64.41
   1  10   3 1012.00   82.24
   1  10   3  841.30   68.52
  -1  10  -3  788.50   64.10
   1 -10   4  309.50   26.43
   1 -10   4  317.90   28.86
  -1 -10  -4  456.30   38.09
  -1 -10  -4  336.40   29.75
   1  10   4  463.90   39.25
   1  10   4  352.20   29.96
  -1  10  -4  342.70   29.12
  -1  10  -4  421.70   36.53
   1 -10   5   78.31   13.91
   1 -10   5   95.99   11.44
  -1 -10  -5   97.52   13.08
  -1 -10  -5   74.90   11.23
   1  10   5   89.66   13.95
   1  10   5   88.20   11.02
  -1  10  -5   77.12   11.35
  -1  10  -5   80.65   13.95
   1 -10   6  174.60   20.23
   1 -10   6  162.00   15.87
  -1 -10  -6  132.50   15.09
  -1 -10  -6  137.60   16.04
   1  10   6  113.80   17.53
   1  10   6  134.20   16.26
  -1  10  -6  135.50   15.07
  -1  10  -6  116.40   17.43
   1 -10   7  237.70   29.49
   1 -10   7  227.30   21.23
   1  10   7  190.70   20.72
  -1  10  -7  172.80   21.85
  -1  10  -7  221.30   21.49
   1 -10   8  257.40   25.52
   1 -10   8  293.60   34.67
  -1 -10  -8  289.90   29.94
  -1 -10  -8  277.40   27.47
   1  10   8  308.80   34.23
   1  10   8  284.60   29.46
  -1  10  -8  244.60   27.95
  -1  10  -8  381.70   35.03
   1 -10   9   77.98   26.21
   1 -10   9   90.18   15.71
  -1 -10  -9   71.80   17.03
  -1 -10  -9   48.16   18.32
   1  10   9   80.88   24.07
   1  10   9  115.30   19.62
  -1  10  -9  116.10   26.71
  -1  10  -9  118.00   18.62
   1 -10  10   38.04   28.12
   1 -10  10   82.24   15.08
  -1 -10 -10   78.40   17.53
  -1 -10 -10   36.55   19.22
   1  10  10   63.82   25.19
   1  10  10   68.70   18.77
  -1  10 -10   85.89   17.41
  -1  10 -10   46.72   17.26
   1 -10  11   21.98   12.39
   1 -10  11  -15.54   28.62
  -1 -10 -11   -6.95   14.00
  -1 -10 -11   -7.53   23.48
   1  10  11   33.50   23.06
   1  10  11    4.84   28.89
  -1  10 -11   21.48   24.68
  -1  10 -11   22.28   18.03
   1 -10  12  -17.90   30.39
   1 -10  12  -19.22   18.33
  -1 -10 -12  -34.38   22.10
  -1 -10 -12   -5.76   19.61
   1  10  12   14.08   29.06
   1  10  12   18.33   23.97
  -1  10 -12   26.41   21.31
  -1  10 -12   -6.64   28.18
   1 -10  13   12.75   24.95
   1 -10  13  -47.86   37.54
  -1 -10 -13  -16.04   27.78
  -1 -10 -13    5.02   23.11
   1  10  13  -25.02   24.36
   1  10  13   29.70   37.33
  -1  10 -13   42.02   30.52
  -1  10 -13   27.95   27.53
   1 -11 -14    7.79   30.69
   1 -11 -14   -9.11   24.39
  -1 -11  14   18.28   35.95
  -1 -11  14    8.93   30.12
   1  11 -14   -9.10   29.44
   1  11 -14  -37.13   36.48
  -1  11  14   10.30   34.08
  -1  11  14   21.71   37.48
   1 -11 -13   16.63   25.24
   1 -11 -13   43.23   27.17
  -1 -11  13   11.26   38.71
  -1 -11  13    0.85   29.06
   1  11 -13   47.78   25.87
   1  11 -13   39.48   16.97
  -1  11  13   74.62   30.73
  -1  11  13   36.86   30.74
   1 -11 -12   16.00   19.22
   1 -11 -12   82.84   23.08
  -1 -11  12   35.11   22.72
  -1 -11  12   52.12   28.77
   1  11 -12   92.40   21.15
   1  11 -12   45.93   21.75
  -1  11  12   67.59   24.98
  -1  11  12   35.34   28.40
   1 -11 -11   -6.49   15.11
   1 -11 -11    3.57   12.39
  -1 -11  11  -12.68   19.35
  -1 -11  11  -15.83   24.50
   1  11 -11    5.41   19.56
   1  11 -11    9.02   18.37
  -1  11  11    5.91   23.68
  -1  11  11   17.74   19.01
   1 -11 -10   17.06   20.80
   1 -11 -10   28.97   15.71
  -1 -11  10   49.58   29.35
  -1 -11  10   29.31   16.42
   1  11 -10   31.55   16.18
   1  11 -10   45.35   16.18
  -1  11  10   33.07   21.74
  -1  11  10   53.51   24.45
   1 -11  -9  361.90   35.50
   1 -11  -9  330.60   31.02
  -1 -11   9  380.00   34.98
  -1 -11   9  362.40   40.36
   1  11  -9  407.00   37.06
   1  11  -9  358.40   34.77
  -1  11   9  357.70   37.91
  -1  11   9  345.40   35.59
   1 -11  -8  -10.53   15.90
   1 -11  -8   17.52   12.49
  -1 -11   8   11.04   12.05
  -1 -11   8   16.71   18.88
   1  11  -8   34.34   14.53
   1  11  -8   14.28   11.53
  -1  11   8  -11.28   18.26
  -1  11   8    1.66   18.24
   1 -11  -7   64.56   10.00
   1 -11  -7   35.46   13.33
  -1 -11   7   68.15   16.92
  -1 -11   7   59.57   11.33
   1  11  -7   44.86   10.07
   1  11  -7   33.58   12.93
  -1  11   7   53.23   13.75
  -1  11   7   52.15   16.02
   1 -11  -6  106.40   13.98
   1 -11  -6  152.70   17.70
  -1 -11   6  156.40   15.53
  -1 -11   6  114.60   16.59
   1  11  -6  187.40   19.83
   1  11  -6  134.20   14.61
  -1  11   6  144.20   18.45
  -1  11   6  158.80   19.46
   1 -11  -5 1627.00  131.20
   1 -11  -5 1488.00  120.40
  -1 -11   5 1492.00  120.10
  -1 -11   5 1548.00  125.30
   1  11  -5 1651.00  132.90
   1  11  -5 1554.00  125.40
  -1  11   5 1663.00  134.80
  -1  11   5 1577.00  127.60
   1 -11  -4   83.87   11.34
   1 -11  -4   71.87    9.92
  -1 -11   4   78.43   11.49
  -1 -11   4   87.27    9.87
   1  11  -4   98.37   10.29
   1  11  -4  104.70   12.56
  -1  11   4   89.70   12.26
  -1  11   4   85.04   11.77
   1 -11  -3  653.50   53.66
   1 -11  -3  643.40   53.01
  -1 -11   3  622.30   51.17
  -1 -11   3  624.10   50.72
   1  11  -3  637.70   51.77
   1  11  -3  539.90   44.35
  -1  11   3  686.20   56.28
  -1  11   3  665.40   55.43
   1 -11  -2   21.90    8.41
   1 -11  -2   13.02    5.90
  -1 -11   2   13.36    6.11
  -1 -11   2   12.09    4.03
   1  11  -2   15.14    4.04
   1  11  -2   31.55    6.53
  -1  11   2   22.28    8.98
  -1  11   2   15.64    6.52
   1 -11  -1   50.38    9.56
   1 -11  -1   24.75    5.47
  -1 -11   1   32.85    6.62
  -1 -11   1   38.30    5.14
  -1 -11   1   38.04    7.18
   1  11  -1   28.89    4.47
   1  11  -1   47.73    6.83
  -1  11   1   45.02    9.15
  -1  11   1   48.51    6.44
   1 -11   0 3101.00  248.40
   1 -11   0 2663.00  213.90
  -1 -11   0 2736.00  219.00
  -1 -11   0 2635.00  211.10
   1  11   0 2919.00  233.60
   1  11   0 2776.00  222.50
  -1  11   0 2709.00  217.00
  -1  11   0 2826.00  226.90
   1 -11   1 4388.00  351.70
   1 -11   1 3857.00  308.80
  -1 -11  -1 3603.00  288.40
  -1 -11  -1 3577.00  286.30
   1  11   1 3247.00  260.10
   1  11   1 3096.00  247.90
  -1  11  -1 2918.00  233.80
  -1  11  -1 3160.00  253.50
   1 -11   2  219.20   20.76
   1 -11   2  247.40   21.29
  -1 -11  -2  221.30   19.42
  -1 -11  -2  242.70   20.77
   1  11   2  200.50   18.00
  -1  11  -2  183.80   16.37
  -1  11  -2  233.00   21.10
   1 -11   3  941.30   76.22
   1 -11   3  946.70   77.68
  -1 -11  -3  828.40   67.17
  -1 -11  -3  714.40   58.51
   1  11   3 1119.00   90.75
   1  11   3  974.80   79.34
  -1  11  -3  886.00   72.41
  -1  11  -3  956.60   77.50
   1 -11   4   10.98    6.67
   1 -11   4  -11.36   12.07
  -1 -11  -4    7.67    7.48
  -1 -11  -4   -3.94    9.57
   1  11   4    9.33    9.06
   1  11   4    4.92    7.18
  -1  11  -4   17.30   10.58
  -1  11  -4   -2.02    7.09
   1 -11   5 1271.00  102.90
   1 -11   5 1147.00   94.36
  -1 -11  -5 1070.00   86.90
  -1 -11  -5 1165.00   94.74
   1  11   5 1388.00  112.70
   1  11   5 1180.00   96.05
  -1  11  -5 1364.00  110.80
   1 -11   6   45.12   10.98
   1 -11   6   43.19   14.37
  -1 -11  -6   77.63   11.84
  -1 -11  -6   55.71    9.21
   1  11   6   82.15   13.95
   1  11   6   59.62   14.29
  -1  11  -6   47.60   13.69
  -1  11  -6   63.01   11.49
   1 -11   7  176.70   19.63
  -1 -11  -7  189.70   21.45
  -1 -11  -7  192.90   21.22
   1  11   7  148.50   19.66
   1  11   7  201.00   20.77
  -1  11  -7  167.00   19.46
  -1  11  -7  181.70   19.97
   1 -11   8    4.65    9.12
   1 -11   8  -16.01   21.07
  -1 -11  -8   11.26    9.93
  -1 -11  -8   25.91   12.40
   1  11   8   -1.84   19.81
   1  11   8   -2.36   13.37
  -1  11  -8    3.08   12.36
  -1  11  -8  -20.82   18.27
   1 -11   9  361.00   32.31
   1 -11   9  405.40   43.45
  -1 -11  -9  431.20   39.01
  -1 -11  -9  324.60   33.77
   1  11   9  356.50   38.07
   1  11   9  423.40   39.81
  -1  11  -9  361.20   33.63
  -1  11  -9  400.90   39.09
   1 -11  10   11.79   14.72
   1 -11  10    1.25   21.25
  -1 -11 -10   44.29   21.69
  -1 -11 -10   -2.36   14.98
   1  11  10   45.03   24.91
   1  11  10   15.46   20.53
  -1  11 -10    2.68   15.34
  -1  11 -10   15.68   15.32
   1 -11  11   21.98   31.94
   1 -11  11   31.83   13.13
  -1 -11 -11   35.29   25.16
  -1 -11 -11   36.80   14.54
   1  11  11   35.17   29.84
   1  11  11   26.19   25.57
  -1  11 -11    9.75   15.19
  -1  11 -11   61.92   25.72
   1 -11  12  -19.94   21.41
   1 -11  12   25.41   36.69
  -1 -11 -12  -10.69   17.02
  -1 -11 -12    9.37   20.81
   1  11  12  -14.35   21.30
   1  11  12   -5.64   26.77
  -1  11 -12    8.02   24.58
  -1  11 -12    9.23   20.53
   1 -11  13  119.20   41.48
   1 -11  13  152.80   31.48
  -1 -11 -13  148.10   33.44
  -1 -11 -13  115.00   28.26
   1  11  13  160.60   31.59
   1  11  13  112.00   39.53
  -1  11 -13  142.60   26.89
  -1  11 -13  132.60   26.58
   1 -12 -14   -4.94   27.65
   1 -12 -14   20.24   25.97
  -1 -12  14   30.51   38.04
  -1 -12  14  -20.20   36.51
  -1  12  14  -57.57   39.21
  -1  12  14  -11.79   34.73
   1 -12 -13   15.79   25.02
   1 -12 -13   43.69   24.91
  -1 -12  13   74.76   31.96
  -1 -12  13   23.09   34.13
   1  12 -13   47.46   20.20
   1  12 -13   30.63   25.83
  -1  12  13   68.40   31.41
  -1  12  13   -1.83   32.54
   1 -12 -12  -15.87   19.82
   1 -12 -12   -9.85   21.16
  -1 -12  12   41.47   36.21
  -1 -12  12    8.88   21.75
   1  12 -12   -0.10   22.63
   1  12 -12  -21.95   15.23
  -1  12  12  -12.39   28.25
  -1  12  12   -2.82   26.96
   1 -12 -11  160.20   22.81
   1 -12 -11  121.30   16.65
  -1 -12  11  114.60   21.59
  -1 -12  11  124.90   35.11
   1  12 -11  101.70   22.35
   1  12 -11  118.60   18.24
  -1  12  11   77.21   20.85
  -1  12  11  162.00   24.47
   1 -12 -10   32.86   18.60
   1 -12 -10   15.71   14.90
  -1 -12  10   19.03   16.28
  -1 -12  10   17.51   23.81
   1  12 -10    6.31   14.19
   1  12 -10    7.86   16.40
  -1  12  10   22.77   21.87
  -1  12  10    2.05   23.85
   1 -12  -9   38.37   16.60
   1 -12  -9   28.44   15.17
  -1 -12   9   19.58   26.80
  -1 -12   9   57.29   12.57
   1  12  -9   28.81   19.94
   1  12  -9   71.78   15.57
  -1  12   9   23.13   19.17
  -1  12   9  108.10   30.69
   1 -12  -8  104.90   17.64
   1 -12  -8   85.11   14.89
  -1 -12   8   44.20   20.51
   1  12  -8   68.50   14.42
   1  12  -8   64.75   13.81
  -1  12   8   38.35   18.38
  -1  12   8   46.92   15.82
   1 -12  -7  439.20   38.76
   1 -12  -7  446.40   38.80
  -1 -12   7  583.60   48.38
  -1 -12   7  436.50   40.30
   1  12  -7  494.00   42.00
   1  12  -7  590.60   50.57
  -1  12   7  487.80   43.78
   1 -12  -6  115.60   15.69
   1 -12  -6  133.30   14.98
  -1 -12   6  101.30   16.31
  -1 -12   6   98.46   10.60
   1  12  -6  135.60   16.07
   1  12  -6  114.40   13.21
  -1  12   6  111.30   13.74
  -1  12   6   92.11   16.10
   1 -12  -5   17.02    8.88
   1 -12  -5    3.07   10.04
  -1 -12   5   11.11    6.25
  -1 -12   5    5.82   11.34
   1  12  -5    4.50    9.06
   1  12  -5    7.24    6.97
  -1  12   5    4.75   10.91
  -1  12   5   10.78   12.53
   1 -12  -4  300.20   26.38
   1 -12  -4  306.70   26.82
  -1 -12   4  282.80   24.04
  -1 -12   4  270.20   24.94
   1  12  -4  312.40   26.44
   1  12  -4  323.90   27.97
  -1  12   4  277.20   24.78
  -1  12   4  313.40   28.41
   1 -12  -3 1962.00  157.90
   1 -12  -3 2062.00  165.80
  -1 -12   3 2332.00  187.40
  -1 -12   3 2308.00  185.00
   1  12  -3 2102.00  168.50
   1  12  -3 1922.00  154.40
  -1  12   3 2120.00  170.40
  -1  12   3 2185.00  176.10
   1 -12  -2   25.02    6.70
   1 -12  -2   22.82    8.85
  -1 -12   2   25.20    4.75
  -1 -12   2   21.01    6.97
   1  12  -2   15.12    4.91
   1  12  -2   24.75    6.64
  -1  12   2   12.85    8.60
  -1  12   2   24.43    7.21
   1 -12  -1 1280.00  103.90
   1 -12  -1 1380.00  111.10
  -1 -12   1 1238.00   99.91
  -1 -12   1 1329.00  106.70
   1  12  -1 1253.00  100.70
   1  12  -1 1209.00   97.47
  -1  12   1 1279.00  103.90
  -1  12   1 1148.00   92.60
   1 -12   0 1779.00  143.40
   1 -12   0 1759.00  141.30
  -1 -12   0 1942.00  155.60
  -1 -12   0 1776.00  142.70
   1  12   0 1860.00  149.50
   1  12   0 1605.00  128.80
  -1  12   0 1873.00  151.00
  -1  12   0 1936.00  155.30
   1 -12   1  320.80   26.92
   1 -12   1  291.60   26.37
  -1 -12  -1  338.40   28.21
  -1 -12  -1  294.00   25.13
   1  12   1  381.70   31.69
   1  12   1  287.50   24.78
  -1  12  -1  349.40   29.26
  -1  12  -1  275.60   24.67
   1 -12   2   89.09   12.90
   1 -12   2  114.20   11.38
  -1 -12  -2  135.00   13.09
  -1 -12  -2   93.27   10.63
   1  12   2  119.10   12.34
   1  12   2  101.90   11.65
  -1  12  -2  106.70   10.80
  -1  12  -2   98.97   12.21
   1 -12   3  790.00   65.47
   1 -12   3  885.20   71.80
  -1 -12  -3  865.80   70.21
  -1 -12  -3  830.30   67.80
   1  12   3  755.50   62.06
   1  12   3  774.50   63.41
  -1  12  -3  793.50   64.67
  -1  12  -3 1021.00   83.22
   1 -12   4  685.50   57.37
   1 -12   4  531.70   44.41
  -1 -12  -4  640.70   52.73
  -1 -12  -4  693.70   57.41
   1  12   4  560.20   46.84
   1  12   4  738.30   60.76
  -1  12  -4  644.70   54.08
  -1  12  -4  713.00   58.42
   1 -12   5   89.77   15.83
   1 -12   5   82.65   10.45
  -1 -12  -5  124.50   16.13
  -1 -12  -5   86.70   10.05
   1  12   5   93.64   15.11
   1  12   5   96.39   14.16
  -1  12  -5  100.70   14.76
  -1  12  -5   98.57   12.66
   1 -12   6   41.07    8.16
   1 -12   6   22.78   15.49
  -1 -12  -6   28.14   12.29
  -1 -12  -6   41.52   11.45
   1  12   6   22.08   12.66
   1  12   6   14.37   11.05
  -1  12  -6    7.71   14.32
  -1  12  -6   15.05   10.35
   1 -12   7  334.60   36.25
   1 -12   7  426.70   36.89
  -1 -12  -7  433.30   40.00
  -1 -12  -7  401.00   36.29
   1  12   7  274.70   27.66
   1  12   7  350.50   34.87
  -1  12  -7  376.10   36.05
   1 -12   8  205.50   21.61
   1 -12   8  209.10   30.14
  -1 -12  -8  182.80   23.91
  -1 -12  -8  224.70   22.96
   1  12   8  127.50   20.50
   1  12   8  187.00   22.83
  -1  12  -8  221.30   23.10
  -1  12  -8  198.10   23.84
   1 -12   9  -21.39   26.14
   1 -12   9    7.45   10.59
  -1 -12  -9  -18.53   13.93
  -1 -12  -9    8.98   13.93
   1  12   9    2.81   15.16
   1  12   9  -21.07   22.21
  -1  12  -9   15.55   18.91
  -1  12  -9    4.01   14.79
   1 -12  10   69.10   16.46
   1 -12  10   49.32   29.52
  -1 -12 -10   31.01   16.13
  -1 -12 -10   57.48   20.21
   1  12  10   60.74   25.95
   1  12  10   34.39   18.21
  -1  12 -10   76.11   17.51
  -1  12 -10   43.42   16.08
   1 -12  11  222.90   24.38
   1 -12  11  169.70   29.16
  -1 -12 -11  165.50   20.70
  -1 -12 -11  201.40   26.72
   1  12  11  169.40   32.69
   1  12  11  265.70   31.05
  -1  12 -11  256.80   26.81
   1 -12  12   20.88   35.85
   1 -12  12   50.60   21.70
  -1 -12 -12   29.28   17.03
  -1 -12 -12   81.66   21.51
   1  12  12   64.24   32.15
   1  12  12   55.48   22.28
  -1  12 -12   50.85   16.38
  -1  12 -12   53.92   21.60
   1 -12  13   26.13   38.87
   1 -12  13   60.57   22.12
  -1 -12 -13   32.83   31.96
  -1 -12 -13    5.69   20.96
   1  12  13   12.50   31.63
   1  12  13  -13.89   30.96
  -1  12 -13  -33.08   23.85
  -1  12 -13   27.74   20.41
   1 -13 -14  -17.01   23.37
   1 -13 -14    6.76   27.63
  -1 -13  14   34.45   36.56
  -1 -13  14   11.72   49.12
   1  13 -14  -61.91   34.75
   1  13 -14   -3.89   22.95
  -1  13  14  -22.12   33.50
  -1  13  14   28.11   37.33
   1 -13 -13   21.52   22.22
   1 -13 -13    4.04   23.34
  -1 -13  13   30.84   23.07
  -1 -13  13   19.09   27.07
   1  13 -13   41.29   26.13
   1  13 -13    5.35   32.13
  -1  13  13   51.84   30.78
  -1  13  13    5.99   31.23
   1 -13 -12  210.10   25.94
   1 -13 -12  107.00   25.11
  -1 -13  12  184.80   25.13
  -1 -13  12  207.70   32.65
   1  13 -12  208.30   32.44
   1  13 -12  190.50   27.65
  -1  13  12  170.30   31.11
  -1  13  12  143.20   34.88
   1 -13 -11  -14.85   21.70
   1 -13 -11   -3.16   12.06
  -1 -13  11   -1.19   31.01
  -1 -13  11  -11.72   18.10
   1  13 -11   12.27   21.05
   1  13 -11    3.45   18.46
  -1  13  11   -1.81   19.36
  -1  13  11  -12.91   21.58
   1 -13 -10  125.70   18.70
   1 -13 -10  110.70   19.05
  -1 -13  10  172.60   33.94
  -1 -13  10  131.20   20.70
   1  13 -10  125.20   19.12
   1  13 -10  134.40   20.05
  -1  13  10   80.94   25.49
  -1  13  10  116.50   20.79
   1 -13  -9  266.20   27.92
   1 -13  -9  355.60   33.37
  -1 -13   9  277.60   27.65
  -1 -13   9  200.20   33.32
   1  13  -9  296.00   32.89
   1  13  -9  232.20   24.69
  -1  13   9  278.10   29.31
  -1  13   9  308.10   35.06
   1 -13  -8  273.90   26.21
   1 -13  -8  255.80   27.30
  -1 -13   8  308.80   33.82
  -1 -13   8  254.70   24.45
   1  13  -8  265.40   26.06
   1  13  -8  326.50   32.24
  -1  13   8  243.90   28.19
  -1  13   8  295.30   31.77
   1 -13  -7   29.11   11.87
   1 -13  -7   13.99   12.05
  -1 -13   7   -4.23   16.49
  -1 -13   7   15.21   10.75
   1  13  -7    4.05   10.03
   1  13  -7   14.04   12.02
  -1  13   7   -6.94   16.13
  -1  13   7    3.31   13.87
   1 -13  -6 1118.00   90.96
   1 -13  -6 1158.00   94.30
  -1 -13   6 1116.00   91.63
  -1 -13   6 1028.00   83.51
   1  13  -6 1080.00   88.05
   1  13  -6 1120.00   91.10
  -1  13   6 1160.00   94.91
  -1  13   6 1276.00  104.30
   1 -13  -5   -4.84   10.18
   1 -13  -5    5.27    9.46
  -1 -13   5    1.82    6.60
  -1 -13   5   -1.35   10.95
   1  13  -5    2.10    6.99
   1  13  -5   -1.52    9.80
  -1  13   5    7.40   11.30
  -1  13   5   11.94   13.14
   1 -13  -4  124.10   14.36
   1 -13  -4  147.20   15.75
  -1 -13   4  140.30   13.37
  -1 -13   4  157.20   16.98
   1  13  -4  178.10   16.14
   1  13  -4  151.50   15.73
  -1  13   4  161.30   17.62
  -1  13   4  149.70   18.26
   1 -13  -3    2.95    8.87
   1 -13  -3    7.10    7.58
  -1 -13   3    9.23    5.21
  -1 -13   3   11.20    7.98
   1  13  -3   24.09    8.00
   1  13  -3   17.20    5.20
  -1  13   3   12.80    8.27
  -1  13   3   20.28   10.83
   1 -13  -2  694.50   56.76
   1 -13  -2  512.10   43.26
  -1 -13   2  598.40   49.38
  -1 -13   2  644.80   52.26
   1  13  -2  607.10   49.32
   1  13  -2  602.80   49.30
  -1  13   2  639.20   52.44
  -1  13   2  527.60   44.94
   1 -13  -1   68.34    8.38
   1 -13  -1   78.79   12.39
  -1 -13   1   60.83    7.32
  -1 -13   1   67.52    9.02
   1  13  -1   64.83    8.88
   1  13  -1   53.48    6.41
  -1  13   1   44.71    7.37
  -1  13   1   45.09   10.43
   1 -13   0  112.30   13.45
   1 -13   0  106.80   11.29
  -1 -13   0   92.92   10.88
  -1 -13   0  101.60    9.81
   1  13   0  107.80   11.85
   1  13   0   90.63    9.12
  -1  13   0  104.50   10.46
  -1  13   0  122.90   14.40
   1 -13   1   27.14   10.24
   1 -13   1   24.00    6.27
  -1 -13  -1   35.23    6.12
  -1 -13  -1   15.04    7.02
   1  13   1   16.74    6.71
   1  13   1   24.33    5.89
  -1  13  -1   19.19    9.23
  -1  13  -1   23.28    6.65
   1 -13   2 3829.00  306.70
   1 -13   2 4489.00  359.90
  -1 -13  -2 3807.00  304.90
  -1 -13  -2 4678.00  374.30
   1  13   2 4162.00  333.30
   1  13   2 3870.00  309.90
  -1  13  -2 3437.00  275.60
  -1  13  -2 4396.00  352.00
   1 -13   3    4.72    6.51
   1 -13   3   10.51   10.42
  -1 -13  -3    1.80    7.53
  -1 -13  -3    6.12    5.59
   1  13   3    9.02    9.02
   1  13   3    2.74    9.04
  -1  13  -3   -1.91    9.21
  -1  13  -3    5.89    6.28
   1 -13   4   23.57   12.10
   1 -13   4   12.10    7.72
  -1 -13  -4    5.90    9.83
  -1 -13  -4   32.42    7.68
   1  13   4    7.43   10.68
   1  13   4   22.42   10.42
  -1  13  -4    1.19    7.41
  -1  13  -4   10.78    9.30
   1 -13   5  100.90   14.83
   1 -13   5  142.70   15.16
  -1 -13  -5  101.60   15.32
   1  13   5  132.50   16.05
   1  13   5  122.40   15.14
  -1  13  -5   97.76   15.43
  -1  13  -5  143.70   15.40
   1 -13   6  713.60   59.20
   1 -13   6  762.80   64.94
  -1 -13  -6  925.70   76.17
  -1 -13  -6  718.20   59.16
   1  13   6  649.80   55.66
   1  13   6  690.40   58.06
  -1  13  -6  753.10   62.82
  -1  13  -6  652.40   54.53
   1 -13   7    0.65    8.40
   1 -13   7    0.83   20.28
  -1 -13  -7   -6.44   16.68
  -1 -13  -7   17.24   11.82
   1  13   7   -1.48   17.58
  -1  13  -7   26.35   12.53
  -1  13  -7   18.52   16.60
   1 -13   8  124.20   17.53
   1 -13   8  131.50   25.61
  -1 -13  -8  113.30   16.49
  -1 -13  -8  106.10   20.05
   1  13   8   92.00   19.14
   1  13   8  101.80   19.86
  -1  13  -8  139.40   18.66
  -1  13  -8   78.52   16.26
   1 -13   9   58.08   13.95
   1 -13   9   17.35   25.93
  -1 -13  -9   32.40   12.13
   1  13   9   34.35   22.81
   1  13   9   43.53   20.88
  -1  13  -9    9.78   12.97
  -1  13  -9   -3.94   17.17
   1 -13  10   70.64   27.12
   1 -13  10  114.30   19.13
  -1 -13 -10   56.96   19.66
  -1 -13 -10   94.94   19.07
   1  13  10   52.98   19.22
   1  13  10  -10.89   25.81
  -1  13 -10   74.87   15.43
  -1  13 -10   87.22   17.93
   1 -13  11    4.65   17.31
   1 -13  11   28.37   27.08
  -1 -13 -11   10.48   18.37
  -1 -13 -11    6.27   16.87
   1  13  11    3.54   28.95
   1  13  11    4.02   18.43
  -1  13 -11    4.66   19.06
  -1  13 -11   45.42   26.45
   1 -13  12  155.70   30.91
   1 -13  12  216.10   26.08
  -1 -13 -12  195.30   24.41
  -1 -13 -12  159.80   25.76
   1  13  12  167.80   26.36
   1  13  12  149.30   39.57
  -1  13 -12  141.50   21.31
  -1  13 -12  218.40   28.95
   1 -13  13   27.10   19.51
   1 -13  13   51.80   32.45
  -1 -13 -13   76.32   36.36
  -1 -13 -13   43.81   19.49
   1  13  13   60.52   33.79
   1  13  13   12.61   27.82
  -1  13 -13   34.65   21.30
  -1  13 -13   20.00   30.40
   1 -14 -14  122.50   32.59
   1 -14 -14   82.25   26.26
  -1 -14  14   91.03   50.88
  -1 -14  14   49.62   28.08
   1  14 -14  109.30   37.36
   1  14 -14  100.40   24.35
  -1  14  14   40.43   32.13
  -1  14  14   87.16   37.10
   1 -14 -13   16.73   24.31
   1 -14 -13  -27.79   18.34
  -1 -14  13   -2.65   39.13
  -1 -14  13   23.51   21.01
   1  14 -13   27.82   33.74
   1  14 -13  -11.33   19.11
  -1  14  13   30.87   31.43
  -1  14  13    0.79   24.31
   1 -14 -12   13.55   17.50
   1 -14 -12   -3.68   22.67
  -1 -14  12    1.53   37.33
  -1 -14  12    4.94   15.43
   1  14 -12   14.35   28.04
   1  14 -12   36.60   16.19
  -1  14  12   31.92   32.87
  -1  14  12   -8.86   22.70
   1 -14 -11   77.37   23.34
   1 -14 -11   99.31   15.59
  -1 -14  11   81.00   36.37
  -1 -14  11   67.65   19.59
   1  14 -11  124.60   21.99
   1  14 -11   84.68   24.43
  -1  14  11   98.55   21.81
  -1  14  11   73.37   27.06
   1 -14 -10  188.20   22.53
   1 -14 -10  241.10   29.06
  -1 -14  10  230.70   25.91
  -1 -14  10  241.60   38.14
   1  14 -10  219.60   25.41
   1  14 -10  268.80   27.99
  -1  14  10  254.50   33.36
  -1  14  10  167.50   25.89
   1 -14  -9   44.60   15.26
   1 -14  -9   60.53   19.02
  -1 -14   9   45.79   17.09
  -1 -14   9   50.99   28.59
   1  14  -9   35.24   20.56
   1  14  -9   53.58   14.29
  -1  14   9   -2.90   22.50
  -1  14   9   24.99   20.43
   1 -14  -8  521.70   44.17
   1 -14  -8  377.50   34.93
  -1 -14   8  499.30   43.20
  -1 -14   8  463.80   45.29
   1  14  -8  380.80   34.62
   1  14  -8  408.90   38.14
  -1  14   8  466.20   42.12
  -1  14   8  452.00   41.44
   1 -14  -7  128.50   18.71
  -1 -14   7  184.60   17.80
  -1 -14   7  184.90   24.34
   1  14  -7  137.80   15.71
   1  14  -7  182.10   21.26
  -1  14   7  170.80   23.28
   1 -14  -6  667.00   55.56
   1 -14  -6  681.60   56.96
  -1 -14   6  633.20   54.15
  -1 -14   6  616.80   51.14
   1  14  -6  601.90   50.96
   1  14  -6  662.40   54.70
  -1  14   6  641.70   54.42
  -1  14   6  656.20   56.22
   1 -14  -5   -0.92   10.36
   1 -14  -5    9.46    7.05
  -1 -14   5   12.75   11.43
  -1 -14   5   15.63    6.58
   1  14  -5   12.57    7.83
   1  14  -5   10.23   10.08
  -1  14   5   -3.19   12.87
  -1  14   5   11.27    8.57
   1 -14  -4 3033.00  243.40
   1 -14  -4 2490.00  200.10
  -1 -14   4 2527.00  203.40
  -1 -14   4 2451.00  196.60
   1  14  -4 2355.00  188.90
   1  14  -4 2177.00  175.10
  -1  14   4 2585.00  208.30
  -1  14   4 2260.00  181.90
   1 -14  -3   36.92    8.82
   1 -14  -3   24.36   10.25
  -1 -14   3   27.45   10.25
  -1 -14   3   29.82    6.00
   1  14  -3   23.72    7.57
   1  14  -3   34.80    6.54
  -1  14   3   29.23    9.22
  -1  14   3   18.28   11.87
   1 -14  -2  272.70   25.05
   1 -14  -2  275.00   23.90
  -1 -14   2  293.00   25.96
  -1 -14   2  215.60   18.38
   1  14  -2  237.30   20.40
   1  14  -2  207.10   18.77
  -1  14   2  219.70   19.45
  -1  14   2  179.90   19.67
   1 -14  -1   69.47   12.08
   1 -14  -1   72.91    8.83
  -1 -14   1   84.57   10.88
  -1 -14   1   74.77    8.23
   1  14  -1   76.26   10.00
   1  14  -1   81.46    8.30
  -1  14   1   75.72    8.93
  -1  14   1   83.60   12.68
   1 -14   0 2191.00  176.50
   1 -14   0 2480.00  199.00
  -1 -14   0 2604.00  208.60
  -1 -14   0 2304.00  185.10
   1  14   0 2875.00  230.20
   1  14   0 2308.00  185.40
  -1  14   0 2568.00  206.60
  -1  14   0 2426.00  194.50
   1 -14   1 1185.00   96.58
   1 -14   1 1464.00  117.90
  -1 -14  -1 1144.00   92.24
  -1 -14  -1 1233.00   99.55
   1  14   1 1326.00  106.70
   1  14   1 1163.00   94.44
  -1  14  -1 1122.00   91.39
  -1  14  -1 1284.00  103.60
   1 -14   2   20.91   10.45
   1 -14   2   20.20    6.41
  -1 -14  -2   18.57    7.30
  -1 -14  -2   23.27    7.22
   1  14   2   16.41    7.66
   1  14   2   20.36    7.85
  -1  14  -2   14.97    9.27
  -1  14  -2   24.89    7.01
   1 -14   3  149.20   17.49
   1 -14   3  218.20   19.68
  -1 -14  -3  181.70   17.68
  -1 -14  -3  150.20   14.31
   1  14   3  230.70   21.43
   1  14   3  170.10   17.46
  -1  14  -3  194.40   18.76
  -1  14  -3  161.80   15.67
   1 -14   4  530.00   44.02
   1 -14   4  437.00   38.72
  -1 -14  -4  478.80   40.78
  -1 -14  -4  376.90   32.08
   1  14   4  367.20   32.06
   1  14   4  473.60   40.55
  -1  14  -4  460.60   38.59
  -1  14  -4  447.10   38.84
   1 -14   5   43.64    9.93
   1 -14   5   50.14   14.14
  -1 -14  -5   56.07   13.20
  -1 -14  -5   80.85   10.09
   1  14   5   69.15   14.69
   1  14   5   43.24   11.41
  -1  14  -5   63.71   13.13
  -1  14  -5   54.80   10.91
   1 -14   6  330.60   32.94
   1 -14   6  265.90   24.25
  -1 -14  -6  264.80   24.57
   1  14   6  192.10   20.47
   1  14   6  205.60   22.25
  -1  14  -6  239.90   25.30
  -1  14  -6  256.10   24.18
   1 -14   7   79.38   21.32
   1 -14   7  131.40   18.04
  -1 -14  -7  138.30   17.36
  -1 -14  -7  144.10   16.13
   1  14   7  122.60   19.26
   1  14   7   87.28   17.38
  -1  14  -7  100.40   15.32
  -1  14  -7  126.80   17.29
   1 -14   8  124.30   24.26
   1 -14   8  195.10   21.88
  -1 -14  -8  152.00   19.35
  -1 -14  -8  154.80   21.99
   1  14   8  162.00   22.43
   1  14   8  181.90   24.29
  -1  14  -8  168.20   20.58
  -1  14  -8  146.70   19.50
   1 -14   9   87.92   15.79
   1 -14   9   62.29   27.49
  -1 -14  -9   56.34   15.39
  -1 -14  -9   37.74   12.32
   1  14   9   54.30   16.26
   1  14   9   64.03   23.46
  -1  14  -9   54.65   15.98
  -1  14  -9   49.31   17.92
   1 -14  10   62.84   30.14
   1 -14  10   77.14   16.15
  -1 -14 -10   60.23   24.08
  -1 -14 -10   64.32   19.28
   1  14  10  150.70   30.91
   1  14  10  123.50   27.18
  -1  14 -10   99.02   18.86
  -1  14 -10  106.70   18.95
   1 -14  11   10.47   19.07
   1 -14  11   57.45   33.13
  -1 -14 -11   53.18   23.46
  -1 -14 -11   -2.00   20.42
   1  14  11   30.36   31.31
   1  14  11   -2.38   22.98
  -1  14 -11   41.90   16.60
  -1  14 -11    1.86   21.55
   1 -14  12   13.46   15.60
   1 -14  12   49.28   28.51
  -1 -14 -12   24.91   25.65
  -1 -14 -12   64.76   22.95
   1  14  12   51.22   38.83
   1  14  12   52.23   25.66
  -1  14 -12   44.41   23.51
  -1  14 -12   31.90   26.20
   1 -14  13   13.82   21.82
   1 -14  13   14.38   29.06
  -1 -14 -13   32.81   35.06
  -1 -14 -13  -19.25   19.54
   1  14  13  -44.37   37.78
   1  14  13   12.11   35.46
  -1  14 -13  -20.06   24.46
  -1  14 -13   22.56   31.45
   1 -15 -14    9.16   37.55
   1 -15 -14   16.96   32.47
  -1 -15  14   -7.77   39.36
  -1 -15  14   -7.55   34.07
   1  15 -14    2.40   29.20
   1  15 -14   19.91   30.55
  -1  15  14   -9.36   36.84
  -1  15  14    9.82   35.32
   1 -15 -13   72.23   25.03
   1 -15 -13   45.70   19.96
  -1 -15  13   18.30   25.15
  -1 -15  13   12.48   38.70
   1  15 -13   44.03   25.64
   1  15 -13   15.89   22.61
  -1  15  13   57.18   24.56
  -1  15  13   -4.84   31.39
   1 -15 -12   -2.48   19.97
   1 -15 -12    5.41   18.50
  -1 -15  12   43.75   30.88
  -1 -15  12   13.35   15.21
   1  15 -12   27.70   26.36
   1  15 -12  -10.23   22.17
  -1  15  12   -6.81   28.48
  -1  15  12  -10.91   23.73
   1 -15 -11   25.75   24.09
   1 -15 -11    5.03   14.93
  -1 -15  11   24.56   17.70
  -1 -15  11    8.72   35.86
   1  15 -11   -4.64   18.09
   1  15 -11   16.27   24.37
  -1  15  11   21.05   27.24
  -1  15  11   12.04   25.09
   1 -15 -10  -39.04   21.03
   1 -15 -10   -1.84   15.58
  -1 -15  10   -1.17   16.58
  -1 -15  10  -24.24   25.86
   1  15 -10    9.43   17.48
   1  15 -10  -17.74   19.40
  -1  15  10  -21.97   23.64
  -1  15  10    4.03   24.75
   1 -15  -9 1307.00  107.00
   1 -15  -9 1586.00  129.40
  -1 -15   9 1333.00  109.50
  -1 -15   9 1706.00  142.10
   1  15  -9 1583.00  128.90
   1  15  -9 1513.00  124.00
  -1  15   9 1335.00  111.00
  -1  15   9 1718.00  140.60
   1 -15  -8  108.50   13.81
   1 -15  -8  111.60   19.33
  -1 -15   8   84.62   15.00
   1  15  -8  114.50   16.84
  -1  15   8   93.58   17.68
  -1  15   8   95.09   22.28
   1 -15  -7    4.12   12.48
   1 -15  -7    3.69    9.21
  -1 -15   7    5.06   18.02
  -1 -15   7  -12.93   11.65
   1  15  -7    8.33    9.49
   1  15  -7   26.57   14.16
  -1  15   7    3.49   11.91
  -1  15   7   -6.59   16.70
   1 -15  -6  374.50   33.08
   1 -15  -6  424.70   37.66
  -1 -15   6  408.90   38.01
  -1 -15   6  430.00   36.29
   1  15  -6  402.60   34.49
   1  15  -6  315.10   29.03
  -1  15   6  363.40   35.18
  -1  15   6  362.00   33.55
   1 -15  -5 1581.00  127.80
   1 -15  -5 1404.00  113.70
  -1 -15   5 1724.00  139.60
  -1 -15   5 1707.00  137.40
   1  15  -5 1654.00  133.60
   1  15  -5 1797.00  144.70
  -1  15   5 1720.00  139.40
   1 -15  -4   35.25    9.13
   1 -15  -4   28.44    8.30
  -1 -15   4   20.82   10.68
  -1 -15   4   24.96    7.36
   1  15  -4   31.77    9.37
   1  15  -4   21.74    6.64
  -1  15   4   12.03   12.02
  -1  15   4   17.56    8.08
   1 -15  -3 1440.00  116.80
   1 -15  -3 1291.00  104.40
  -1 -15   3 1422.00  115.30
  -1 -15   3 1368.00  110.10
   1  15  -3 1371.00  110.70
   1  15  -3 1169.00   94.36
  -1  15   3 1314.00  106.40
  -1  15   3 1239.00  101.20
   1 -15  -2    2.02    6.80
   1 -15  -2    4.97    9.39
  -1 -15   2    3.85    4.64
  -1 -15   2    0.03    8.98
   1  15  -2   -6.17    5.04
   1  15  -2   -1.98    7.44
  -1  15   2   -1.25    7.62
  -1  15   2    7.10   11.05
   1 -15  -1 1833.00  147.40
   1 -15  -1 1937.00  156.60
  -1 -15   1 1716.00  137.90
  -1 -15   1 1865.00  150.10
   1  15  -1 1828.00  147.20
   1  15  -1 2008.00  161.00
  -1  15   1 1803.00  145.00
  -1  15   1 2187.00  176.30
   1 -15   0   20.33    6.93
   1 -15   0   27.16   10.12
  -1 -15   0   37.90    8.93
  -1 -15   0   22.55    5.72
   1  15   0   28.45    5.93
   1  15   0   23.16    8.09
  -1  15   0   33.27    6.78
  -1  15   0   58.65   11.62
   1 -15   1 1629.00  131.90
   1 -15   1 1779.00  143.10
  -1 -15  -1 2051.00  164.80
   1  15   1 2263.00  181.50
   1  15   1 2041.00  164.50
  -1  15  -1 2131.00  171.70
  -1  15  -1 1923.00  154.70
   1 -15   2   13.92   10.85
   1 -15   2   20.51    6.37
  -1 -15  -2   14.05    7.91
  -1 -15  -2   12.75    6.09
   1  15   2   13.67    9.19
   1  15   2   19.39    5.98
  -1  15  -2   12.20    9.62
  -1  15  -2    6.89    7.07
   1 -15   3  704.90   57.64
   1 -15   3  745.60   62.62
  -1 -15  -3  856.80   69.96
  -1 -15  -3  826.20   67.52
   1  15   3  887.50   72.82
   1  15   3  782.60   64.13
  -1  15  -3  706.10   57.90
  -1  15  -3  857.30   70.51
   1 -15   4  158.90   19.55
  -1 -15  -4  132.70   14.47
  -1 -15  -4  113.20   12.83
   1  15   4  140.20   17.34
   1  15   4  161.30   17.83
  -1  15  -4  164.50   16.59
  -1  15  -4  164.10   17.67
   1 -15   5 1929.00  156.50
   1 -15   5 2123.00  171.00
  -1 -15  -5 1829.00  147.60
  -1 -15  -5 1497.00  121.10
   1  15   5 1641.00  132.90
   1  15   5 1984.00  160.20
  -1  15  -5 1614.00  130.90
  -1  15  -5 1750.00  141.30
   1 -15   6   -2.65    8.47
   1 -15   6   -2.91   14.12
  -1 -15  -6   -1.53   10.20
  -1 -15  -6    9.62   12.45
   1  15   6   -1.01   12.64
   1  15   6    8.37   11.81
  -1  15  -6    1.89   10.70
  -1  15  -6   -3.44   13.97
   1 -15   7   47.44   19.36
   1 -15   7   37.90   13.58
  -1 -15  -7   75.68   14.16
  -1 -15  -7   70.12   17.25
   1  15   7   75.87   15.10
   1  15   7   68.55   17.15
  -1  15  -7  111.30   19.46
  -1  15  -7   70.83   13.87
   1 -15   8   34.66   24.69
   1 -15   8   27.05   14.80
  -1 -15  -8   34.50   14.87
  -1 -15  -8   80.62   19.65
   1  15   8   20.84   19.35
   1  15   8   55.43   20.35
  -1  15  -8   52.86   17.59
  -1  15  -8   23.23   12.12
   1 -15   9  366.40   33.53
   1 -15   9  435.90   44.25
  -1 -15  -9  438.50   38.61
  -1 -15  -9  531.60   48.73
   1  15   9  425.90   42.89
   1  15   9  557.80   51.46
  -1  15  -9  460.00   41.48
  -1  15  -9  438.30   41.21
   1 -15  10   34.19   29.35
   1 -15  10    5.58   13.46
  -1 -15 -10    8.50   18.99
  -1 -15 -10  -10.54   20.49
   1  15  10   30.65   20.03
   1  15  10    2.04   26.35
  -1  15 -10   16.14   18.94
  -1  15 -10    9.00   11.89
   1 -15  11   11.47   18.71
   1 -15  11  -41.42   27.13
  -1 -15 -11   29.90   21.66
  -1 -15 -11    5.57   27.36
   1  15  11   23.35   29.30
   1  15  11  -12.81   25.80
  -1  15 -11   24.14   18.02
  -1  15 -11    9.16   18.19
   1 -15  12    2.52   15.12
   1 -15  12   16.45   38.56
  -1 -15 -12   42.51   28.87
  -1 -15 -12    0.93   25.89
   1  15  12   -2.09   28.61
   1  15  12  -27.06   35.87
  -1  15 -12   58.06   22.72
  -1  15 -12    0.69   30.16
   1 -15  13  148.50   29.65
   1 -15  13  106.60   32.88
  -1 -15 -13  136.70   31.19
  -1 -15 -13  125.70   36.85
   1  15  13  128.00   35.99
   1  15  13  106.80   40.91
  -1  15 -13  148.80   27.97
  -1  15 -13   88.37   30.75
   1 -16 -14   -2.79   32.28
   1 -16 -14   23.10   31.64
  -1 -16  14   80.80   38.30
  -1 -16  14    6.84   37.17
   1  16 -14    9.54   31.34
   1  16 -14    9.38   31.58
  -1  16  14   32.32   35.72
  -1  16  14  -34.29   36.94
   1 -16 -13   22.46   24.37
   1 -16 -13   45.55   27.29
  -1 -16  13   35.48   32.61
  -1 -16  13   20.77   31.39
   1  16 -13   11.48   28.63
  -1  16  13   18.21   32.41
  -1  16  13    7.51   31.63
   1 -16 -12  -16.08   22.52
   1 -16 -12   10.97   16.23
  -1 -16  12  -10.99   36.31
  -1 -16  12    6.31   19.38
   1  16 -12   24.56   22.22
   1  16 -12   23.95   16.89
  -1  16  12   13.45   25.74
  -1  16  12    9.44   22.87
   1 -16 -11   43.20   18.21
   1 -16 -11   49.06   20.85
  -1 -16  11   38.41   14.39
  -1 -16  11   36.80   35.31
   1  16 -11   39.54   25.27
   1  16 -11   32.08   19.25
  -1  16  11   13.16   27.62
  -1  16  11   29.28   27.63
   1 -16 -10   26.42   18.94
   1 -16 -10   18.16   16.08
  -1 -16  10   23.28   17.20
  -1 -16  10   13.93   31.31
   1  16 -10   37.46   17.00
   1  16 -10   43.75   17.27
  -1  16  10   57.70   24.08
  -1  16  10   43.91   30.93
   1 -16  -9   47.40   15.80
   1 -16  -9   52.81   19.87
  -1 -16   9   61.67   30.50
  -1 -16   9   76.79   17.85
   1  16  -9   55.47   16.24
   1  16  -9   90.50   18.60
  -1  16   9  102.30   24.53
  -1  16   9   89.16   23.70
   1 -16  -8   65.60   11.64
   1 -16  -8   64.53   17.00
  -1 -16   8   94.25   28.96
  -1 -16   8   56.45   11.84
   1  16  -8   42.05   17.51
   1  16  -8   85.42   16.27
  -1  16   8   90.43   20.55
  -1  16   8   68.52   16.84
   1 -16  -7  879.90   72.47
  -1 -16   7  851.40   69.81
  -1 -16   7  780.30   67.30
   1  16  -7  881.70   72.99
   1  16  -7  832.50   68.67
  -1  16   7  926.00   77.07
   1 -16  -6  204.40   20.68
   1 -16  -6  227.60   22.89
  -1 -16   6  220.60   26.52
  -1 -16   6  198.80   19.39
   1  16  -6  193.90   18.88
   1  16  -6  178.80   19.69
  -1  16   6  206.60   23.79
  -1  16   6  184.80   21.22
   1 -16  -5   -1.57   10.31
   1 -16  -5    4.71   10.58
  -1 -16   5   12.40    7.67
  -1 -16   5   15.49   12.06
   1  16  -5    5.05   10.50
   1  16  -5   10.01    7.77
  -1  16   5   10.22   11.28
  -1  16   5    0.72   12.92
   1 -16  -4  529.70   44.51
   1 -16  -4  476.40   40.18
  -1 -16   4  489.50   42.08
  -1 -16   4  377.10   31.69
   1  16  -4  386.30   33.33
   1  16  -4  399.00   33.50
  -1  16   4  452.30   38.40
  -1  16   4  383.50   34.17
   1 -16  -3 1831.00  147.90
   1 -16  -3 1858.00  149.60
  -1 -16   3 1818.00  146.80
  -1 -16   3 1772.00  142.40
   1  16  -3 1703.00  137.00
   1  16  -3 1802.00  145.10
  -1  16   3 1999.00  161.70
  -1  16   3 1727.00  139.20
   1 -16  -2  326.10   29.53
  -1 -16   2  256.80   23.88
  -1 -16   2  262.60   22.33
   1  16  -2  265.80   23.96
   1  16  -2  269.40   23.16
  -1  16   2  253.40   22.20
  -1  16   2  246.10   24.57
   1 -16  -1  723.60   60.50
   1 -16  -1  764.50   62.37
  -1 -16   1  765.10   62.85
  -1 -16   1  717.90   58.38
   1  16  -1  710.00   58.47
   1  16  -1  693.00   56.25
  -1  16   1  908.00   74.69
  -1  16   1  616.10   50.61
   1 -16   0  688.60   57.63
   1 -16   0  589.90   48.62
  -1 -16   0  725.90   59.57
  -1 -16   0  678.20   55.22
   1  16   0  723.40   58.69
   1  16   0  585.60   48.67
  -1  16   0  664.50   54.31
  -1  16   0  637.10   53.45
   1 -16   1  682.20   57.07
   1 -16   1  728.00   59.55
  -1 -16  -1  664.50   54.66
  -1 -16  -1  706.50   57.59
   1  16   1  735.20   60.88
   1  16   1  604.00   49.46
  -1  16  -1  578.80   47.77
  -1  16  -1  613.60   51.55
   1 -16   2  349.20   29.54
   1 -16   2  368.60   33.34
  -1 -16  -2  345.70   29.58
  -1 -16  -2  422.00   35.57
   1  16   2  355.80   30.64
   1  16   2  293.20   26.64
  -1  16  -2  352.60   30.10
  -1  16  -2  313.70   28.34
   1 -16   3 1243.00  101.70
   1 -16   3 1412.00  114.00
  -1 -16  -3 1428.00  115.20
  -1 -16  -3 1560.00  125.90
   1  16   3 1600.00  129.20
   1  16   3 1293.00  105.00
  -1  16  -3 1475.00  119.10
  -1  16  -3 1372.00  111.50
   1 -16   4   43.91   12.76
   1 -16   4   63.00   10.03
  -1 -16  -4   43.60    9.75
  -1 -16  -4   39.73   11.09
   1  16   4   51.81   11.21
   1  16   4   64.68   13.60
  -1  16  -4   44.25   12.61
  -1  16  -4   51.54    9.94
   1 -16   5  190.40   23.80
   1 -16   5  155.00   15.29
  -1 -16  -5  176.80   18.17
  -1 -16  -5  160.70   17.77
   1  16   5  162.90   19.65
   1  16   5  186.30   21.22
  -1  16  -5  125.10   17.73
  -1  16  -5  123.10   14.45
   1 -16   6   14.86   14.68
   1 -16   6   40.07   11.56
  -1 -16  -6   46.88   14.30
  -1 -16  -6   37.90   11.05
   1  16   6    5.12   15.63
   1  16   6   17.54   13.33
  -1  16  -6   18.81   11.03
  -1  16  -6   22.18   13.81
   1 -16   7  615.60   58.16
   1 -16   7  436.70   38.69
  -1 -16  -7  510.40   45.82
  -1 -16  -7  526.90   45.46
   1  16   7  449.80   41.59
   1  16   7  501.60   44.16
  -1  16  -7  519.70   44.85
  -1  16  -7  484.90   44.52
   1 -16   8  228.20   23.87
   1 -16   8  241.70   32.81
  -1 -16  -8  348.60   34.41
  -1 -16  -8  285.70   28.47
   1  16   8  258.60   27.69
   1  16   8  275.90   31.19
  -1  16  -8  246.00   28.66
  -1  16  -8  297.30   29.24
   1 -16   9   24.63   27.87
   1 -16   9    6.29   13.41
  -1 -16  -9    4.38   18.47
  -1 -16  -9   11.96   13.44
   1  16   9    3.95   18.18
   1  16   9   11.92   24.97
  -1  16  -9   18.97   18.42
  -1  16  -9   10.63   15.43
   1 -16  10   56.61   13.41
   1 -16  10   19.56   25.90
  -1 -16 -10   52.00   19.29
  -1 -16 -10   66.56   19.58
   1  16  10   45.49   25.03
   1  16  10   52.26   20.01
  -1  16 -10   97.14   23.61
  -1  16 -10   33.15   17.47
   1 -16  11   57.96   31.96
   1 -16  11   76.57   16.30
  -1 -16 -11   49.70   20.17
  -1 -16 -11   50.94   25.88
   1  16  11  103.30   25.82
   1  16  11   47.80   24.99
  -1  16 -11   72.29   21.73
  -1  16 -11   85.83   21.17
   1 -16  12   35.50   39.73
   1 -16  12    6.43   23.28
  -1 -16 -12   45.09   28.90
  -1 -16 -12   12.95   22.36
   1  16  12   39.69   28.16
   1  16  12   29.93   26.53
  -1  16 -12   27.71   23.95
  -1  16 -12   40.87   17.41
   1 -16  13   13.51   45.73
   1 -16  13   11.26   19.89
  -1 -16 -13    3.41   23.71
  -1 -16 -13   43.66   34.90
   1  16  13    8.23   31.52
   1  16  13  -22.79   34.55
  -1  16 -13    9.68   27.38
  -1  16 -13  -14.72   26.78
   1 -17 -14  -34.45   25.23
  -1 -17  14  -15.78   25.37
  -1 -17  14   -4.24   50.63
   1  17 -14   19.81   23.04
   1  17 -14    4.58   35.80
  -1  17  14   35.80   28.25
  -1  17  14   -8.07   35.87
   1 -17 -13    8.06   23.98
   1 -17 -13   37.09   24.68
  -1 -17  13  -15.14   26.36
  -1 -17  13  -17.78   45.54
   1  17 -13   33.35   34.42
   1  17 -13  -10.07   19.91
  -1  17  13  -24.68   30.31
  -1  17  13   40.66   34.70
   1 -17 -12  118.80   21.82
   1 -17 -12  125.30   27.33
  -1 -17  12  102.50   39.66
  -1 -17  12  152.00   27.16
   1  17 -12   99.92   24.12
   1  17 -12  122.60   24.98
  -1  17  12   74.89   30.06
  -1  17  12   31.71   29.21
   1 -17 -11   26.88   17.90
   1 -17 -11   -3.85   20.19
  -1 -17  11   37.58   36.46
  -1 -17  11   24.12   13.92
   1  17 -11   10.77   14.30
   1  17 -11    1.72   26.28
  -1  17  11   10.46   27.55
  -1  17  11   12.67   20.94
   1 -17 -10  231.30   27.38
   1 -17 -10  189.70   22.55
  -1 -17  10  133.10   34.52
  -1 -17  10  216.00   26.15
   1  17 -10  146.50   21.87
   1  17 -10  179.10   20.06
  -1  17  10  163.40   26.13
  -1  17  10  234.50   29.63
   1 -17  -9  -13.43   18.84
   1 -17  -9    2.85   14.66
  -1 -17   9    5.37   16.10
  -1 -17   9    4.81   29.48
   1  17  -9   27.57   15.74
   1  17  -9  -11.71   15.79
  -1  17   9    2.04   21.05
  -1  17   9    0.02   23.64
   1 -17  -8  643.60   56.11
   1 -17  -8  678.00   56.61
  -1 -17   8  647.80   62.69
  -1 -17   8  860.20   71.56
   1  17  -8  676.80   59.83
   1  17  -8  605.40   52.22
  -1  17   8  808.90   68.40
  -1  17   8  743.00   65.53
   1 -17  -7   86.51   17.56
   1 -17  -7  115.60   14.47
  -1 -17   7   85.97   20.51
  -1 -17   7   91.30   13.45
   1  17  -7   98.73   17.27
   1  17  -7   88.88   14.15
  -1  17   7   79.08   14.91
  -1  17   7   77.40   21.11
   1 -17  -6 1285.00  104.70
   1 -17  -6 1496.00  121.40
  -1 -17   6 1281.00  103.80
  -1 -17   6 1285.00  105.80
   1  17  -6 1248.00  101.80
   1  17  -6 1306.00  105.90
  -1  17   6 1293.00  105.80
  -1  17   6 1037.00   85.89
   1 -17  -5   51.88   11.97
   1 -17  -5   75.47   14.00
  -1 -17   5   84.73   11.37
  -1 -17   5   80.47   15.43
   1  17  -5   51.41    9.21
   1  17  -5   70.11   12.99
  -1  17   5   28.96   16.31
  -1  17   5   62.07   12.69
   1 -17  -4  191.80   19.28
   1 -17  -4  163.70   17.63
  -1 -17   4  188.80   20.62
  -1 -17   4  174.30   16.52
   1  17  -4  200.90   18.73
   1  17  -4  181.80   18.53
  -1  17   4  196.60   19.83
  -1  17   4  240.20   25.25
   1 -17  -3  588.60   49.34
   1 -17  -3  594.10   49.62
  -1 -17   3  629.00   51.48
  -1 -17   3  644.60   53.92
   1  17  -3  629.60   52.11
   1  17  -3  638.80   52.42
  -1  17   3  650.70   55.51
  -1  17   3  603.20   50.11
   1 -17  -2 2243.00  180.80
   1 -17  -2 2120.00  170.60
  -1 -17   2 2211.00  177.30
  -1 -17   2 2138.00  172.30
   1  17  -2 2265.00  182.10
   1  17  -2 2071.00  166.30
  -1  17   2 2055.00  165.30
  -1  17   2 2148.00  173.40
   1 -17  -1  176.80   16.84
   1 -17  -1  126.30   17.31
  -1 -17   1  137.40   15.13
  -1 -17   1  142.60   13.97
   1  17  -1  171.50   17.27
   1  17  -1  172.90   15.73
  -1  17   1  159.70   15.64
  -1  17   1  163.20   17.70
   1 -17   0    4.46    7.62
   1 -17   0   19.57   11.25
  -1 -17   0   13.07    6.43
  -1 -17   0    5.21    8.75
   1  17   0    8.08    8.84
   1  17   0   -3.30    6.07
   1  17   0    7.36    9.18
  -1  17   0   23.82   11.08
  -1  17   0    8.82    6.68
   1 -17   1  198.50   21.01
   1 -17   1  174.60   16.74
  -1 -17  -1  142.50   15.28
  -1 -17  -1  165.10   15.97
   1  17   1  179.10   18.93
   1  17   1  151.00   14.54
  -1  17  -1  127.00   15.45
  -1  17  -1  137.90   14.08
   1 -17   2 1901.00  154.00
   1 -17   2 1877.00  151.00
  -1 -17  -2 2366.00  189.90
  -1 -17  -2 2409.00  193.60
   1  17   2 2177.00  175.50
   1  17   2 2054.00  165.20
  -1  17  -2 1918.00  154.40
  -1  17  -2 1906.00  154.00
   1 -17   3  299.20   25.98
   1 -17   3  290.00   27.69
  -1 -17  -3  232.90   21.13
  -1 -17  -3  263.30   23.83
   1  17   3  235.20   23.50
   1  17   3  263.60   24.29
  -1  17  -3  187.30   19.51
  -1  17  -3  239.10   21.99
   1 -17   4  456.40   40.67
   1 -17   4  448.20   37.88
  -1 -17  -4  472.30   40.50
  -1 -17  -4  435.40   36.48
   1  17   4  409.50   36.05
   1  17   4  458.60   40.01
  -1  17  -4  392.50   33.69
  -1  17  -4  484.70   42.08
   1 -17   5  141.60   15.79
   1 -17   5  134.70   20.93
  -1 -17  -5  189.80   18.11
  -1 -17  -5  150.10   17.69
   1  17   5  146.10   19.19
   1  17   5   92.62   16.34
  -1  17  -5  129.30   17.43
  -1  17  -5  117.90   14.10
   1 -17   6  687.70   59.99
   1 -17   6  712.90   59.35
  -1 -17  -6  524.30   44.52
  -1 -17  -6  693.60   58.76
   1  17   6  722.80   61.78
   1  17   6  845.60   70.77
  -1  17  -6  662.80   56.31
  -1  17  -6  707.10   59.03
   1 -17   7    3.90   10.81
   1 -17   7    2.43   21.71
  -1 -17  -7    4.37   14.51
   1  17   7    0.56   13.13
   1  17   7  -12.69   16.97
  -1  17  -7    2.13   11.55
  -1  17  -7   -2.11   18.09
   1 -17   8  312.40   35.41
   1 -17   8  367.50   33.69
  -1 -17  -8  318.60   31.15
  -1 -17  -8  291.60   31.05
   1  17   8  294.40   30.15
   1  17   8  261.50   30.07
  -1  17  -8  367.00   36.42
  -1  17  -8  268.90   27.31
   1 -17   9    8.40   21.61
   1 -17   9   -1.42   10.92
  -1 -17  -9  -11.26   14.80
  -1 -17  -9    6.86   18.97
   1  17   9   -7.62   23.53
   1  17   9   10.39   21.14
  -1  17  -9   -5.03   20.36
  -1  17  -9   -7.58   16.21
   1 -17  10   41.35   13.76
   1 -17  10   -0.99   32.71
  -1 -17 -10   60.22   18.33
  -1 -17 -10   72.73   24.07
   1  17  10   46.92   24.70
   1  17  10   39.97   19.70
  -1  17 -10   33.38   13.58
  -1  17 -10   48.14   23.78
   1 -17  11    3.12   14.63
   1 -17  11   -2.96   34.90
  -1 -17 -11    9.33   15.20
  -1 -17 -11   29.35   19.14
   1  17  11    5.45   18.42
   1  17  11   16.07   24.05
  -1  17 -11   32.92   25.02
  -1  17 -11   -6.60   15.04
   1 -17  12  109.30   24.69
   1 -17  12   83.36   32.21
  -1 -17 -12   97.76   20.74
  -1 -17 -12   59.48   29.66
   1  17  12   63.80   26.25
   1  17  12   63.24   26.08
  -1  17 -12   99.68   22.32
  -1  17 -12   49.19   21.26
   1 -17  13   34.56   18.72
   1 -17  13  -51.39   57.21
  -1 -17 -13   15.04   21.40
  -1 -17 -13   24.35   34.68
   1  17  13   30.89   32.31
   1  17  13   -5.38   41.07
  -1  17 -13   33.09   21.57
  -1  17 -13   13.90   36.36
   1 -18 -13   24.10   20.71
   1 -18 -13   26.29   22.68
  -1 -18  13   15.09   21.79
  -1 -18  13  -97.73   43.56
   1  18 -13  -22.53   27.68
   1  18 -13    4.44   32.00
  -1  18  13   -7.91   29.43
  -1  18  13  -39.76   26.54
   1 -18 -12   -7.39   24.11
   1 -18 -12  -33.50   27.25
  -1 -18  12  -10.79   31.57
  -1 -18  12  -11.22   23.10
   1  18 -12    0.98   20.29
   1  18 -12   10.96   30.45
  -1  18  12   25.09   31.61
  -1  18  12   17.69   34.96
   1 -18 -11   44.91   22.36
   1 -18 -11   55.43   15.77
  -1 -18  11   27.47   31.29
  -1 -18  11   83.31   18.57
   1  18 -11   52.48   21.33
   1  18 -11   44.76   24.30
  -1  18  11   56.48   25.43
  -1  18  11   73.07   24.70
   1 -18 -10  151.00   25.64
   1 -18 -10  172.20   19.17
  -1 -18  10  156.90   28.43
  -1 -18  10  145.70   22.82
   1  18 -10  130.80   20.44
   1  18 -10  147.40   21.97
  -1  18  10  187.50   30.82
  -1  18  10  126.30   21.64
   1 -18  -9    1.52   13.64
   1 -18  -9  -10.36   16.82
  -1 -18   9    8.21   31.29
  -1 -18   9   27.12   16.20
   1  18  -9    8.10   15.96
   1  18  -9    5.38   16.67
  -1  18   9  -14.01   19.92
  -1  18   9   -3.01   20.68
   1 -18  -8  330.40   29.70
   1 -18  -8  341.70   33.21
  -1 -18   8  398.50   44.91
   1  18  -8  348.60   33.66
  -1  18   8  370.60   36.77
  -1  18   8  278.70   30.39
   1 -18  -7  194.40   22.46
   1 -18  -7  167.00   17.74
  -1 -18   7  202.60   20.64
  -1 -18   7  218.60   27.07
   1  18  -7  220.10   24.26
   1  18  -7  185.60   19.80
  -1  18   7  184.30   20.72
  -1  18   7  198.30   25.30
   1 -18  -6  180.70   21.14
   1 -18  -6  153.40   18.71
  -1 -18   6  167.80   17.58
  -1 -18   6  157.60   21.96
   1  18  -6  165.20   17.08
   1  18  -6  164.70   19.60
  -1  18   6  145.70   23.43
  -1  18   6  117.80   18.51
   1 -18  -5   68.06   12.62
   1 -18  -5   77.68   13.63
  -1 -18   5   51.34   15.93
  -1 -18   5   64.68   10.06
   1  18  -5   48.91    9.59
   1  18  -5   37.54   11.92
  -1  18   5   81.72   18.30
  -1  18   5   60.50   11.10
   1 -18  -4 1359.00  110.30
   1 -18  -4 1273.00  103.50
  -1 -18   4 1351.00  109.00
  -1 -18   4 1462.00  119.00
   1  18  -4 1405.00  113.50
   1  18  -4 1357.00  110.10
  -1  18   4 1279.00  105.30
  -1  18   4 1416.00  115.20
   1 -18  -3 1087.00   89.03
   1 -18  -3 1057.00   86.04
  -1 -18   3 1049.00   84.79
  -1 -18   3  976.60   80.27
   1  18  -3 1017.00   82.84
   1  18  -3 1064.00   86.21
  -1  18   3  972.40   79.49
  -1  18   3 1053.00   87.27
   1 -18  -2    2.94    7.81
   1 -18  -2   -6.72   11.28
  -1 -18   2    3.83    5.84
  -1 -18   2    4.17   10.56
   1  18  -2    7.91    9.03
   1  18  -2    5.89    6.42
  -1  18   2    8.97   12.36
  -1  18   2    3.56    8.36
   1 -18  -1  142.60   18.85
   1 -18  -1  136.40   14.67
  -1 -18   1  114.80   14.69
  -1 -18   1  146.80   14.24
   1  18  -1  125.90   12.61
   1  18  -1  115.70   14.01
  -1  18   1  137.40   16.08
  -1  18   1  128.60   13.44
   1 -18   0  694.30   57.04
   1 -18   0  859.30   71.33
  -1 -18   0  773.90   63.04
  -1 -18   0  886.00   72.73
   1  18   0  841.50   69.38
   1  18   0  809.90   65.76
   1  18   0  794.40   65.51
  -1  18   0  812.80   67.38
  -1  18   0  929.30   75.51
   1 -18   1   30.00    9.65
   1 -18   1   40.96    8.81
   1 -18   1   33.81   12.65
  -1 -18  -1   34.41    8.21
  -1 -18  -1   27.81    9.66
   1  18   1   30.68   11.16
   1  18   1   25.38    7.37
  -1  18  -1   34.18    7.98
  -1  18  -1   40.12   13.36
   1 -18   2   15.50    6.99
   1 -18   2   21.28   13.15
  -1 -18  -2   30.49    9.44
  -1 -18  -2   17.79    7.57
   1  18   2   12.43    8.44
   1  18   2  -11.57   11.33
  -1  18  -2    8.08   11.48
  -1  18  -2    8.06    8.28
   1 -18   3  369.10   31.59
   1 -18   3  376.50   34.10
  -1 -18  -3  397.10   34.15
  -1 -18  -3  387.70   32.99
   1  18   3  375.30   32.38
   1  18   3  419.70   37.32
  -1  18  -3  393.30   34.43
  -1  18  -3  345.20   30.12
   1 -18   4  387.40   35.98
   1 -18   4  450.40   38.03
  -1 -18  -4  427.00   36.19
  -1 -18  -4  318.80   28.84
   1  18   4  331.90   29.95
   1  18   4  384.80   34.13
  -1  18  -4  436.60   37.36
  -1  18  -4  400.00   35.50
   1 -18   5  316.60   28.46
   1 -18   5  294.20   31.80
  -1 -18  -5  290.30   27.22
  -1 -18  -5  278.10   25.11
   1  18   5  288.70   28.60
   1  18   5  313.40   30.30
  -1  18  -5  272.40   26.31
   1 -18   6  255.80   24.66
   1 -18   6  164.80   25.13
  -1 -18  -6  252.80   26.15
  -1 -18  -6  240.10   22.58
   1  18   6  197.50   24.46
   1  18   6  193.60   24.24
  -1  18  -6  242.90   23.34
  -1  18  -6  190.00   22.76
   1 -18   7  270.90   30.98
   1 -18   7  226.30   22.63
  -1 -18  -7  277.60   27.42
  -1 -18  -7  267.20   28.15
   1  18   7  321.40   31.12
   1  18   7  331.60   31.64
  -1  18  -7  328.70   33.63
  -1  18  -7  255.50   25.42
   1 -18   8  177.70   20.50
   1 -18   8  173.30   29.81
  -1 -18  -8  168.20   21.87
  -1 -18  -8  170.20   21.15
   1  18   8  149.50   21.04
   1  18   8  135.10   20.87
  -1  18  -8  172.70   21.16
  -1  18  -8  145.70   22.62
   1 -18   9   13.70   28.28
   1 -18   9   56.05   12.80
  -1 -18  -9   30.51   19.97
  -1 -18  -9   70.54   17.60
   1  18   9   88.25   22.71
   1  18   9   34.46   24.41
  -1  18  -9   74.27   22.94
  -1  18  -9   56.07   16.56
   1 -18  10   74.50   24.81
   1 -18  10   82.93   17.72
  -1 -18 -10  115.90   25.83
  -1 -18 -10   56.93   14.36
   1  18  10   80.30   23.24
   1  18  10   67.08   20.91
  -1  18 -10   82.48   19.24
  -1  18 -10   91.97   25.21
   1 -18  11   14.17   26.85
   1 -18  11   76.36   18.12
  -1 -18 -11   62.67   20.52
  -1 -18 -11   60.19   18.58
   1  18  11   66.64   34.19
   1  18  11   11.37   22.72
  -1  18 -11   47.54   30.18
  -1  18 -11   66.73   20.41
   1 -18  12   21.97   28.54
   1 -18  12    9.40   17.66
  -1 -18 -12   41.33   26.10
  -1 -18 -12   17.72   24.43
   1  18  12   32.07   22.34
   1  18  12   52.07   34.96
  -1  18 -12   16.38   24.02
  -1  18 -12   50.01   24.01
   1 -18  13   82.52   47.39
   1 -18  13   48.40   27.52
  -1 -18 -13   -0.81   30.06
  -1 -18 -13    3.22   33.47
   1  18  13  -11.72   30.33
   1  18  13   50.16   45.99
  -1  18 -13  -15.19   25.64
  -1  18 -13    3.99   21.27
   1 -19 -13  126.30   29.00
   1 -19 -13   83.32   24.36
  -1 -19  13  118.50   35.66
  -1 -19  13  120.80   30.76
   1  19 -13  121.40   27.46
   1  19 -13  106.20   30.08
  -1  19  13  113.70   36.17
  -1  19  13  128.10   30.47
   1 -19 -12  -36.24   28.58
   1 -19 -12    0.27   19.52
  -1 -19  12    5.19   17.94
   1  19 -12  -21.79   18.82
   1  19 -12   -6.92   33.22
  -1  19  12  -48.71   30.59
  -1  19  12   -0.62   32.75
   1 -19 -11   94.23   26.84
   1 -19 -11   90.20   15.41
  -1 -19  11   31.16   38.70
  -1 -19  11   85.28   21.47
   1  19 -11  124.70   22.92
   1  19 -11   85.78   17.43
  -1  19  11  136.90   32.28
  -1  19  11  101.20   24.37
   1 -19 -10   45.63   22.66
   1 -19 -10   36.86   15.04
  -1 -19  10    5.90   18.88
  -1 -19  10   45.28   32.74
   1  19 -10   36.58   17.48
   1  19 -10   62.42   20.17
  -1  19  10   32.81   27.23
  -1  19  10   -3.38   24.15
   1 -19  -9  542.30   46.35
   1 -19  -9  561.20   50.37
  -1 -19   9  669.40   67.97
  -1 -19   9  533.70   47.46
   1  19  -9  545.80   48.30
   1  19  -9  501.20   44.82
  -1  19   9  683.30   62.18
  -1  19   9  634.00   54.98
   1 -19  -8   51.59   18.69
   1 -19  -8   49.84   14.54
  -1 -19   8   46.17   27.21
  -1 -19   8   18.15   17.15
   1  19  -8   56.30   16.53
   1  19  -8   42.39   21.50
  -1  19   8   -1.60   19.55
  -1  19   8   54.46   23.15
   1 -19  -7   36.50   15.50
   1 -19  -7   18.51   10.98
  -1 -19   7   14.38   10.46
  -1 -19   7   10.77   18.23
   1  19  -7    0.72   12.55
   1  19  -7   12.37   11.94
  -1  19   7  -15.96   19.40
  -1  19   7   15.63   16.29
   1 -19  -6   17.95   13.89
   1 -19  -6    5.22    9.77
  -1 -19   6   -1.13    7.75
  -1 -19   6   14.71   18.06
   1  19  -6    4.94   13.25
   1  19  -6   23.37    9.81
  -1  19   6    0.34   14.85
  -1  19   6   -4.27   15.67
   1 -19  -5  670.20   56.15
   1 -19  -5  720.20   59.74
  -1 -19   5  786.60   64.66
  -1 -19   5  756.80   64.05
   1  19  -5  782.90   64.23
   1  19  -5  765.70   63.68
  -1  19   5  701.70   60.17
  -1  19   5  714.70   59.44
   1 -19  -4   10.27    9.26
   1 -19  -4   20.58   12.65
  -1 -19   4   26.21   13.37
  -1 -19   4   15.35    7.67
   1  19  -4   12.98   10.28
   1  19  -4   26.09    8.44
  -1  19   4   25.72   11.85
  -1  19   4   19.78   13.86
   1 -19  -3  859.90   70.49
   1 -19  -3  812.60   67.65
  -1 -19   3  921.50   74.79
  -1 -19   3  826.30   68.58
   1  19  -3  843.60   69.21
   1  19  -3  731.60   59.86
  -1  19   3  801.80   67.76
  -1  19   3  945.90   77.45
   1 -19  -2   64.19   10.74
   1 -19  -2   79.41   14.68
  -1 -19   2   72.87   13.72
  -1 -19   2   80.77    9.45
  -1 -19   2   59.56   11.67
   1  19  -2   55.31    8.90
   1  19  -2   51.36   11.14
  -1  19   2   49.24   13.54
  -1  19   2   83.31   10.96
   1 -19  -1 2034.00  163.80
   1 -19  -1 1954.00  158.40
  -1 -19   1 2128.00  171.50
  -1 -19   1 2096.00  168.50
   1  19  -1 2024.00  163.30
   1  19  -1 1792.00  144.10
  -1  19   1 2130.00  171.30
  -1  19   1 2273.00  183.50
  -1  19   1 2374.00  191.60
   1 -19   0  680.40   56.08
   1 -19   0  618.50   52.61
  -1 -19   0  682.40   56.88
  -1 -19   0  677.00   55.37
   1  19   0  687.50   57.45
   1  19   0  749.50   61.03
   1  19   0  742.80   61.57
  -1  19   0  608.40   50.25
  -1  19   0  702.30   59.08
   1 -19   1  414.10   34.98
   1 -19   1  538.40   46.19
  -1 -19  -1  442.40   37.67
   1  19   1  544.80   45.00
   1  19   1  582.80   49.42
  -1  19  -1  493.30   41.27
   1 -19   2  214.30   19.71
   1 -19   2  277.80   27.15
  -1 -19  -2  266.70   23.58
  -1 -19  -2  222.50   21.39
   1  19   2  249.50   22.78
   1  19   2  201.40   21.36
  -1  19  -2  210.10   21.19
  -1  19  -2  177.40   17.47
   1 -19   3  440.80   37.29
   1 -19   3  482.40   42.75
  -1 -19  -3  522.00   44.09
  -1 -19  -3  462.00   39.27
   1  19   3  525.30   45.46
   1  19   3  614.40   51.15
  -1  19  -3  578.80   48.32
   1 -19   4  105.60   19.63
   1 -19   4  109.50   13.12
  -1 -19  -4  107.60   15.10
  -1 -19  -4  111.00   14.04
   1  19   4  105.10   15.34
   1  19   4  117.10   15.95
  -1  19  -4  116.00   14.08
  -1  19  -4  134.70   17.19
   1 -19   5  589.70   52.43
   1 -19   5  524.90   44.45
  -1 -19  -5  527.30   44.50
  -1 -19  -5  590.20   50.24
   1  19   5  564.50   48.66
   1  19   5  562.90   48.63
  -1  19  -5  521.70   44.36
  -1  19  -5  575.40   48.33
   1 -19   6   34.78   11.42
   1 -19   6   43.69   23.54
  -1 -19  -6   43.76   13.40
  -1 -19  -6   51.13   10.74
   1  19   6   71.65   20.29
   1  19   6   38.55   17.41
  -1  19  -6   37.00   11.07
  -1  19  -6   66.18   17.43
   1 -19   7    1.43   23.11
   1 -19   7   26.22   11.05
  -1 -19  -7    6.17   16.06
  -1 -19  -7   21.99   13.31
   1  19   7   30.20   18.96
   1  19   7    4.97   18.53
  -1  19  -7   19.93   12.42
  -1  19  -7   41.51   18.84
   1 -19   8   38.87   24.27
   1 -19   8  -18.21   14.30
  -1 -19  -8   -2.32   19.65
  -1 -19  -8    7.05   13.47
   1  19   8   16.03   21.18
   1  19   8   24.96   21.61
  -1  19  -8   11.33   17.31
  -1  19  -8   23.29   15.47
   1 -19   9  251.90   24.73
   1 -19   9  276.90   34.20
  -1 -19  -9  222.20   25.35
  -1 -19  -9  253.70   27.08
   1  19   9  202.10   28.25
   1  19   9  257.40   31.10
  -1  19  -9  214.10   29.34
  -1  19  -9  281.30   29.07
   1 -19  10   -6.98   17.73
   1 -19  10   19.11   33.82
  -1 -19 -10   12.12   13.23
  -1 -19 -10   -5.52   16.94
   1  19  10   -6.28   20.96
   1  19  10  -17.43   26.89
  -1  19 -10   13.03   16.91
  -1  19 -10   -6.53   17.21
   1 -19  11  -20.70   21.09
   1 -19  11   20.52   26.56
  -1 -19 -11   19.48   22.51
  -1 -19 -11   36.36   25.23
   1  19  11  -12.43   30.46
   1  19  11  -24.29   33.82
  -1  19 -11  -11.73   20.94
  -1  19 -11  -28.92   22.01
   1 -19  12  -19.56   20.12
   1 -19  12   -2.30   38.98
  -1 -19 -12   23.04   24.82
  -1 -19 -12  -15.93   22.76
   1  19  12    6.09   26.57
   1  19  12   -1.05   21.99
  -1  19 -12   15.12   21.45
  -1  19 -12   19.45   31.15
   1 -19  13   65.75   22.69
   1 -19  13   77.69   38.81
  -1 -19 -13   66.68   32.00
  -1 -19 -13   86.85   30.80
   1  19  13    9.95   29.23
   1  19  13   83.50   34.52
  -1  19 -13   38.34   25.69
  -1  19 -13   35.04   28.09
   1 -20 -13   41.16   27.82
   1 -20 -13   21.53   24.21
  -1 -20  13   53.73   27.32
  -1 -20  13  -11.96   43.25
   1  20 -13   50.71   32.55
   1  20 -13   47.75   21.61
  -1  20  13   16.49   35.60
  -1  20  13  -23.05   27.96
   1 -20 -12   56.56   30.31
   1 -20 -12   23.85   16.55
  -1 -20  12   22.52   31.65
  -1 -20  12   38.34   20.25
   1  20 -12   32.36   25.79
  -1  20  12   41.33   33.11
  -1  20  12   46.65   26.07
   1 -20 -11  111.80   21.10
   1 -20 -11  112.80   29.45
  -1 -20  11   85.96   27.80
  -1 -20  11   93.32   23.52
   1  20 -11   97.09   23.90
   1  20 -11  142.10   26.85
  -1  20  11   70.02   30.63
  -1  20  11   57.50   31.83
   1 -20 -10   23.97   17.58
   1 -20 -10   27.84   21.73
  -1 -20  10   47.02   20.31
  -1 -20  10   -1.32   30.63
   1  20 -10   60.22   13.77
   1  20 -10   60.68   23.62
  -1  20  10   26.89   25.97
  -1  20  10   41.79   26.84
   1 -20  -9    9.43   20.26
   1 -20  -9   25.01   11.44
  -1 -20   9   22.88   29.36
  -1 -20   9   -4.27   16.71
   1  20  -9   10.75   16.84
   1  20  -9   16.33   18.69
  -1  20   9   46.17   21.10
  -1  20   9   22.54   25.54
   1 -20  -8   94.81   17.93
   1 -20  -8   63.40   19.78
  -1 -20   8   74.00   29.01
  -1 -20   8   99.06   18.89
   1  20  -8  123.90   24.63
   1  20  -8   68.89   17.89
  -1  20   8   66.35   24.37
  -1  20   8  111.50   22.84
   1 -20  -7  508.90   44.34
   1 -20  -7  506.80   44.91
  -1 -20   7  556.20   53.15
  -1 -20   7  555.50   46.82
   1  20  -7  489.60   43.24
   1  20  -7  480.20   41.40
  -1  20   7  573.00   51.52
  -1  20   7  487.40   44.83
   1 -20  -6   33.61   15.10
   1 -20  -6   38.87   15.26
  -1 -20   6   14.21   18.78
  -1 -20   6   31.85   10.39
   1  20  -6   15.87    9.70
   1  20  -6   22.62   14.11
  -1  20   6   55.72   21.05
  -1  20   6   51.79   15.85
   1 -20  -5   56.12   12.32
   1 -20  -5   55.40   13.98
  -1 -20   5    4.03   16.30
  -1 -20   5   43.65   10.37
   1  20  -5   50.55   10.25
   1  20  -5   23.94   12.61
  -1  20   5   42.38   18.47
  -1  20   5   70.02   15.05
   1 -20  -4  507.30   43.38
   1 -20  -4  472.80   41.05
  -1 -20   4  489.30   40.77
  -1 -20   4  500.80   44.08
   1  20  -4  474.30   40.73
   1  20  -4  549.70   45.87
  -1  20   4  409.60   38.76
  -1  20   4  483.40   41.63
   1 -20  -3  118.00   17.28
   1 -20  -3   88.87   12.23
  -1 -20   3  119.10   13.03
  -1 -20   3  143.50   18.54
   1  20  -3  113.10   13.12
   1  20  -3  143.00   16.03
  -1  20   3  112.60   14.74
  -1  20   3  110.20   18.99
   1 -20  -2  531.20   46.15
   1 -20  -2  620.80   51.66
  -1 -20   2  608.50   51.51
  -1 -20   2  535.90   45.75
  -1 -20   2  586.30   48.11
   1  20  -2  552.40   45.57
   1  20  -2  552.20   46.44
  -1  20   2  597.60   49.49
  -1  20   2  623.80   53.54
   1 -20  -1  214.10   20.33
  -1 -20   1  231.70   20.86
  -1 -20   1  273.00   26.20
   1  20  -1  257.60   22.73
   1  20  -1  292.20   26.97
  -1  20   1  265.60   26.35
  -1  20   1  244.00   25.28
  -1  20   1  277.10   24.91
   1 -20   0  697.10   57.61
   1 -20   0  753.10   63.19
  -1 -20   0  780.40   64.74
  -1 -20   0  854.80   69.73
   1  20   0  607.10   49.80
   1  20   0  697.50   58.36
   1  20   0  785.60   65.10
  -1  20   0  767.60   64.41
  -1  20   0  739.10   60.68
   1 -20   1  550.70   47.75
   1 -20   1  605.10   50.17
   1 -20   1  579.10   49.68
  -1 -20  -1  583.90   48.26
  -1 -20  -1  578.20   48.62
   1  20   1  501.00   43.13
   1  20   1  436.10   36.60
  -1  20  -1  507.80   44.31
  -1  20  -1  635.40   52.41
   1 -20   2   47.12    9.20
   1 -20   2   22.96   15.33
  -1 -20  -2   46.20   10.58
  -1 -20  -2   35.67    9.44
   1  20   2   20.70   14.83
   1  20   2   36.32    9.63
  -1  20  -2   37.85    9.70
  -1  20  -2   42.04   13.11
   1 -20   3  652.20   53.70
   1 -20   3  759.20   64.29
  -1 -20  -3  833.10   68.25
  -1 -20  -3  905.00   74.24
   1  20   3  704.40   58.28
   1  20   3  773.50   64.81
  -1  20  -3  775.90   63.87
  -1  20  -3  797.90   66.47
   1 -20   4   95.46   18.99
   1 -20   4  113.20   13.57
  -1 -20  -4   94.86   14.63
  -1 -20  -4   78.02   12.74
   1  20   4   57.18   13.17
   1  20   4   74.22   13.89
  -1  20  -4   92.49   13.39
  -1  20  -4   85.95   15.04
   1 -20   5  320.10   33.03
   1 -20   5  360.60   32.06
  -1 -20  -5  303.60   27.50
  -1 -20  -5  299.50   28.65
   1  20   5  307.40   29.82
   1  20   5  359.20   33.38
  -1  20  -5  398.60   34.89
  -1  20  -5  312.90   28.74
   1 -20   6  156.40   29.20
   1 -20   6   92.43   15.01
  -1 -20  -6  120.50   14.83
   1  20   6  142.10   23.47
   1  20   6  119.70   20.41
  -1  20  -6  144.40   21.50
  -1  20  -6  115.10   16.06
   1 -20   7  354.50   31.90
   1 -20   7  303.50   36.35
  -1 -20  -7  333.50   30.70
  -1 -20  -7  331.50   34.11
   1  20   7  290.90   30.78
   1  20   7  317.50   34.27
  -1  20  -7  219.20   23.27
  -1  20  -7  268.00   30.15
   1 -20   8  131.40   29.38
   1 -20   8  205.40   23.32
  -1 -20  -8  192.00   20.30
  -1 -20  -8  193.10   24.36
   1  20   8  196.00   27.81
   1  20   8  216.50   28.67
  -1  20  -8  252.90   25.94
  -1  20  -8  203.60   24.74
   1 -20   9   18.39   14.55
   1 -20   9   40.44   29.41
  -1 -20  -9   11.06   14.98
  -1 -20  -9   14.60   22.03
   1  20   9    5.79   19.07
   1  20   9   -6.26   24.21
  -1  20  -9   29.43   13.71
  -1  20  -9    1.44   22.05
   1 -20  10   14.74   18.24
   1 -20  10  -39.26   32.32
  -1 -20 -10   -3.65   23.68
  -1 -20 -10   10.46   18.19
   1  20  10   44.92   28.63
   1  20  10  -11.09   27.20
  -1  20 -10    1.46   19.37
  -1  20 -10   38.46   18.20
   1 -20  11   36.39   36.35
   1 -20  11  103.90   22.42
  -1 -20 -11   48.53   28.34
  -1 -20 -11  102.70   21.83
   1  20  11   99.31   33.71
   1  20  11   61.27   25.99
  -1  20 -11   97.31   17.99
  -1  20 -11   67.06   22.58
   1 -20  12   38.73   41.16
   1 -20  12   55.09   27.00
  -1 -20 -12    9.27   22.05
  -1 -20 -12   62.59   19.72
   1  20  12   17.67   22.42
   1  20  12    4.29   26.34
  -1  20 -12   84.79   19.91
  -1  20 -12   70.84   23.43
   1 -20  13  -20.94   33.96
   1 -20  13   58.91   22.10
  -1 -20 -13   61.56   24.20
  -1 -20 -13   42.87   28.09
   1  20  13   52.46   43.76
   1  20  13  -23.24   26.83
  -1  20 -13   55.70   32.00
  -1  20 -13   23.88   34.69
   1 -21 -13   30.55   21.99
   1 -21 -13   10.72   23.66
  -1 -21  13   27.31   20.92
  -1 -21  13   10.76   39.53
   1  21 -13    9.12   30.21
   1  21 -13    2.35   29.33
  -1  21  13   -0.95   26.91
  -1  21  13   20.96   27.46
   1 -21 -12   97.74   31.40
   1 -21 -12  156.80   27.49
  -1 -21  12  111.20   28.99
  -1 -21  12   82.56   44.99
   1  21 -12   77.06   19.76
   1  21 -12   77.28   25.15
  -1  21  12  122.90   35.97
  -1  21  12   69.90   36.61
   1 -21 -11   23.13   28.47
   1 -21 -11   -5.98   18.18
  -1 -21  11   -5.86   21.02
  -1 -21  11   12.07   37.01
   1  21 -11   -0.36   20.72
   1  21 -11    0.21   28.70
  -1  21  11  -23.55   33.41
  -1  21  11    6.33   27.37
   1 -21 -10  191.20   23.91
   1 -21 -10  162.20   23.33
  -1 -21  10  151.70   24.61
  -1 -21  10  128.70   30.83
   1  21 -10  171.60   29.21
   1  21 -10  149.80   23.05
  -1  21  10  199.50   28.84
  -1  21  10  176.80   28.59
   1 -21  -9    3.16   15.50
   1 -21  -9  -11.17   19.04
  -1 -21   9    0.67   29.23
  -1 -21   9    9.26   19.00
   1  21  -9    6.13   19.71
   1  21  -9  -16.61   17.18
  -1  21   9   -1.15   24.15
  -1  21   9    1.87   23.41
   1 -21  -8  269.40   29.65
  -1 -21   8  327.80   32.90
  -1 -21   8  209.40   36.22
   1  21  -8  348.70   37.38
   1  21  -8  377.10   35.82
  -1  21   8  267.60   34.01
  -1  21   8  400.80   39.80
   1 -21  -7    5.23   17.11
   1 -21  -7   -2.20   13.69
  -1 -21   7   23.94   24.84
  -1 -21   7    2.56   11.85
   1  21  -7   -1.00   12.29
   1  21  -7   -0.58   16.12
  -1  21   7   13.86   23.75
  -1  21   7    3.12   17.39
   1 -21  -6  606.20   51.71
  -1 -21   6  672.30   59.53
  -1 -21   6  534.30   45.22
   1  21  -6  600.70   51.65
   1  21  -6  551.80   46.58
  -1  21   6  551.60   47.64
   1 -21  -5   65.71   15.24
   1 -21  -5   63.10   12.84
  -1 -21   5   45.24   18.12
  -1 -21   5   65.70   10.43
   1  21  -5   38.56   14.12
   1  21  -5   50.76   10.93
  -1  21   5   69.20   15.95
  -1  21   5   49.12   17.58
   1 -21  -4   16.59   10.75
   1 -21  -4   32.89   12.23
  -1 -21   4   35.86   14.77
  -1 -21   4   24.36    8.06
   1  21  -4   34.16   12.41
   1  21  -4   37.25   10.31
  -1  21   4    6.25   12.33
  -1  21   4   39.05   16.63
   1 -21  -3   37.28   12.87
   1 -21  -3   38.47   11.01
  -1 -21   3   55.98    9.50
  -1 -21   3   36.93   14.44
   1  21  -3   45.79   11.86
   1  21  -3   54.05    9.73
  -1  21   3   52.84   11.68
  -1  21   3   27.68   17.22
   1 -21  -2 1850.00  150.20
   1 -21  -2 1269.00  103.00
  -1 -21   2 1544.00  124.50
  -1 -21   2 1466.00  119.10
  -1 -21   2 1553.00  126.20
   1  21  -2 1414.00  114.50
   1  21  -2 1444.00  116.40
  -1  21   2 1366.00  112.00
  -1  21   2 1269.00  102.80
   1 -21  -1   46.94   16.58
   1 -21  -1   45.30    9.06
  -1 -21   1   50.96   13.07
  -1 -21   1   51.40    9.03
   1  21  -1   73.10    9.65
   1  21  -1   49.35   12.89
  -1  21   1   60.87   15.94
  -1  21   1   64.25   15.31
  -1  21   1   57.24   10.32
   1 -21   0  246.50   25.43
  -1 -21   0  306.80   26.72
  -1 -21   0  272.30   25.95
   1  21   0  309.50   29.21
   1  21   0  327.70   28.05
   1  21   0  275.70   25.75
  -1  21   0  278.90   27.75
  -1  21   0  273.70   24.84
   1 -21   1   89.51   15.95
   1 -21   1   53.12   15.38
   1 -21   1   76.70   11.27
  -1 -21  -1   68.86   12.25
  -1 -21  -1   63.75   10.10
   1  21   1   55.84   13.53
   1  21   1   66.08   10.11
  -1  21  -1   53.64    9.82
  -1  21  -1   34.29   12.10
   1 -21   2  504.80   42.28
   1 -21   2  680.60   58.55
  -1 -21  -2  541.00   45.51
  -1 -21  -2  609.70   50.57
   1  21   2  488.80   43.51
   1  21   2  446.40   37.76
  -1  21  -2  608.90   51.87
  -1  21  -2  468.30   39.85
   1 -21   3  -27.19   16.14
   1 -21   3   -4.84    7.82
  -1 -21  -3    3.81    9.91
  -1 -21  -3    0.83   10.60
   1  21   3  -10.57   14.31
   1  21   3    3.91   11.14
  -1  21  -3    9.14   15.04
  -1  21  -3   -9.92    8.99
   1 -21   4    1.54    8.05
   1 -21   4   18.08   15.70
  -1 -21  -4    2.76   10.51
  -1 -21  -4    2.85   12.14
   1  21   4  -10.44   12.52
   1  21   4    7.16   14.59
  -1  21  -4    8.45   13.08
  -1  21  -4    5.62   10.72
   1 -21   5   31.88   11.48
   1 -21   5   19.79   20.19
  -1 -21  -5   25.93   13.97
  -1 -21  -5   46.43   10.87
   1  21   5   40.62   15.70
   1  21   5   53.42   14.82
  -1  21  -5   28.74   13.48
  -1  21  -5   49.73   12.30
   1 -21   6  678.50   57.51
   1 -21   6  496.00   48.08
  -1 -21  -6  570.80   50.51
   1  21   6  676.90   58.95
   1  21   6  682.80   59.11
  -1  21  -6  682.70   59.33
  -1  21  -6  617.30   52.16
   1 -21   7   42.48   26.01
   1 -21   7   -8.04   13.13
  -1 -21  -7   -4.83   11.06
  -1 -21  -7   20.04   18.34
   1  21   7  -28.06   18.56
   1  21   7    0.27   19.22
  -1  21  -7   -8.04   18.07
  -1  21  -7   -7.06   12.27
   1 -21   8  358.60   42.16
   1 -21   8  301.20   29.91
  -1 -21  -8  355.60   36.42
  -1 -21  -8  291.80   28.78
   1  21   8  303.60   34.55
   1  21   8  338.20   37.57
  -1  21  -8  296.30   28.85
  -1  21  -8  288.50   30.55
   1 -21   9   27.03   27.34
   1 -21   9    7.04   16.79
  -1 -21  -9   11.02   22.54
  -1 -21  -9    6.25   11.62
   1  21   9   12.22   19.00
   1  21   9   15.15   24.30
  -1  21  -9    9.57   16.59
  -1  21  -9  -11.66   15.09
   1 -21  10  124.20   19.01
   1 -21  10  106.60   35.88
  -1 -21 -10  154.30   29.09
  -1 -21 -10  127.30   21.68
   1  21  10  107.10   31.09
   1  21  10  101.20   24.90
  -1  21 -10  119.00   28.21
  -1  21 -10   86.06   20.06
   1 -21  11   36.25   15.59
   1 -21  11  -44.41   31.47
  -1 -21 -11   37.70   16.84
  -1 -21 -11  -11.31   27.30
   1  21  11  -11.53   26.85
   1  21  11   47.04   33.11
  -1  21 -11   34.86   21.47
  -1  21 -11  -29.96   30.11
   1 -21  12  181.60   35.50
   1 -21  12  151.70   23.30
  -1 -21 -12  179.80   30.48
  -1 -21 -12  118.00   27.53
   1  21  12  194.20   41.41
   1  21  12   73.15   29.19
  -1  21 -12  127.80   29.52
  -1  21 -12  193.40   31.21
   1 -21  13  -18.18   31.99
   1 -21  13  -47.59   43.16
  -1 -21 -13   15.22   33.82
  -1 -21 -13  -11.55   26.06
   1  21  13    0.97   26.79
   1  21  13   25.89   39.38
  -1  21 -13   12.04   29.79
  -1  21 -13   33.64   25.97
   1 -22 -13   -8.28   30.17
   1 -22 -13  -17.31   23.42
  -1 -22  13   10.83   27.88
  -1 -22  13   -3.21   32.41
   1  22 -13   17.89   23.30
   1  22 -13  -30.26   23.47
  -1  22  13   -6.82   26.02
  -1  22  13    0.45   39.25
   1 -22 -12  -76.97   28.47
   1 -22 -12   -1.30   18.37
  -1 -22  12  -35.05   32.34
  -1 -22  12    7.13   21.40
   1  22 -12    7.15   24.63
   1  22 -12    0.42   32.58
  -1  22  12    8.21   31.04
  -1  22  12  -18.00   27.81
   1 -22 -11  178.90   21.31
   1 -22 -11  147.10   29.89
  -1 -22  11  150.10   22.52
  -1 -22  11  148.40   33.29
   1  22 -11  149.90   27.03
   1  22 -11  137.10   32.27
  -1  22  11  153.60   28.34
  -1  22  11   91.59   34.04
   1 -22 -10   71.85   14.35
   1 -22 -10   91.44   23.66
  -1 -22  10  106.30   18.99
  -1 -22  10  115.70   37.51
   1  22 -10   92.10   26.80
   1  22 -10   85.11   20.89
  -1  22  10  120.50   28.08
  -1  22  10   59.87   27.54
   1 -22  -9   30.56   17.54
   1 -22  -9   30.00   15.43
  -1 -22   9   98.81   34.74
  -1 -22   9   80.56   20.92
   1  22  -9   64.38   23.07
   1  22  -9   24.53   16.63
  -1  22   9   66.19   22.69
  -1  22   9   30.52   23.49
   1 -22  -8   -3.05   11.11
   1 -22  -8   16.75   20.03
  -1 -22   8   -2.77   16.46
  -1 -22   8   -7.61   31.89
   1  22  -8  -41.21   21.80
   1  22  -8   15.20   15.84
  -1  22   8    9.45   14.75
  -1  22   8  -12.01   26.42
   1 -22  -7  318.40   33.02
   1 -22  -7  256.40   25.34
  -1 -22   7  361.80   43.05
  -1 -22   7  276.80   26.82
   1  22  -7  309.70   31.93
   1  22  -7  276.20   27.67
  -1  22   7  322.60   37.42
  -1  22   7  336.80   32.10
   1 -22  -6  109.30   16.09
   1 -22  -6  157.30   21.27
  -1 -22   6  141.80   16.71
  -1 -22   6  173.50   26.14
   1  22  -6  157.80   20.70
   1  22  -6  133.60   15.60
  -1  22   6  194.60   27.68
  -1  22   6  139.10   20.50
   1 -22  -5   18.84   13.08
   1 -22  -5   -2.19   12.84
  -1 -22   5   22.75    9.65
  -1 -22   5   14.25   17.98
   1  22  -5   20.64   12.94
   1  22  -5   14.05   10.67
  -1  22   5   22.43   19.96
  -1  22   5   19.01   11.16
   1 -22  -4  434.50   38.84
   1 -22  -4  575.80   48.95
  -1 -22   4  564.70   49.81
  -1 -22   4  521.70   43.51
   1  22  -4  525.00   44.25
   1  22  -4  622.90   52.59
  -1  22   4  514.80   44.08
  -1  22   4  528.20   49.25
   1 -22  -3 1504.00  121.70
   1 -22  -3 1607.00  130.90
  -1 -22   3 1567.00  127.60
  -1 -22   3 1532.00  123.60
   1  22  -3 1333.00  108.40
   1  22  -3 1531.00  123.70
  -1  22   3 1768.00  144.30
  -1  22   3 1448.00  117.50
   1 -22  -2  390.90   36.49
   1 -22  -2  333.00   29.76
  -1 -22   2  335.40   30.94
  -1 -22   2  344.00   29.45
   1  22  -2  258.90   23.23
   1  22  -2  298.40   27.30
  -1  22   2  268.70   24.51
   1 -22  -1  637.60   53.03
   1 -22  -1  797.00   67.52
  -1 -22   1  593.20   50.83
  -1 -22   1  682.40   56.22
   1  22  -1  694.10   56.87
   1  22  -1  673.00   56.80
  -1  22   1  810.20   68.33
  -1  22   1  619.90   51.53
  -1  22   1  765.30   64.65
   1 -22   0  930.70   76.05
   1 -22   0  990.90   82.33
  -1 -22   0  779.70   65.11
  -1 -22   0  833.90   68.12
   1  22   0  821.40   68.67
   1  22   0  867.60   70.69
  -1  22   0  803.90   67.66
  -1  22   0  853.50   69.83
   1 -22   1  248.40   23.17
  -1 -22  -1  301.20   28.10
  -1 -22  -1  348.20   30.26
   1  22   1  330.40   30.98
   1  22   1  275.60   24.75
  -1  22  -1  376.60   32.61
  -1  22  -1  298.80   28.58
   1 -22   2   33.46    9.17
   1 -22   2   28.92   15.70
  -1 -22  -2   22.59   12.38
  -1 -22  -2   13.76    9.64
   1  22   2   23.35    9.99
   1  22   2   26.58   14.98
  -1  22  -2   38.82   10.43
  -1  22  -2   38.11   13.72
   1 -22   3  125.70   20.18
   1 -22   3  102.30   13.18
  -1 -22  -3  135.90   16.21
  -1 -22  -3   87.32   12.81
   1  22   3  117.10   16.26
   1  22   3  137.50   19.56
  -1  22  -3  132.40   18.05
  -1  22  -3   89.38   13.14
   1 -22   4  161.10   16.33
   1 -22   4  219.20   26.17
  -1 -22  -4  171.90   17.75
  -1 -22  -4  167.60   19.23
   1  22   4  154.60   21.47
   1  22   4  194.70   21.58
  -1  22  -4  149.00   19.76
  -1  22  -4  161.80   18.31
   1 -22   5  167.50   18.66
   1 -22   5  207.30   28.27
  -1 -22  -5  204.10   21.94
  -1 -22  -5  181.60   18.98
   1  22   5  147.90   22.89
   1  22   5  179.80   21.58
  -1  22  -5  208.60   21.36
  -1  22  -5  133.50   19.50
   1 -22   6  132.80   18.09
   1 -22   6  120.30   23.90
  -1 -22  -6   97.02   16.52
  -1 -22  -6   77.15   18.22
   1  22   6  113.90   23.30
   1  22   6  118.50   19.04
  -1  22  -6  138.00   20.61
  -1  22  -6  102.60   15.74
   1 -22   7  211.50   34.92
   1 -22   7  194.70   22.41
  -1 -22  -7  206.50   24.87
  -1 -22  -7  209.40   20.96
   1  22   7  240.40   31.49
   1  22   7  214.00   27.39
  -1  22  -7  178.10   23.84
  -1  22  -7  198.80   22.49
   1 -22   8   39.60   15.48
   1 -22   8   11.10   29.08
  -1 -22  -8   25.01   18.61
  -1 -22  -8   24.88   16.40
   1  22   8   23.75   22.69
   1  22   8   49.14   22.51
  -1  22  -8   32.14   14.77
  -1  22  -8    3.51   19.98
   1 -22   9   31.95   32.23
   1 -22   9   34.18   18.06
  -1 -22  -9   28.89   20.43
  -1 -22  -9   -6.94   15.90
   1  22   9   13.75   26.59
   1  22   9   16.76   29.72
  -1  22  -9   18.94   11.45
  -1  22  -9   27.91   19.70
   1 -22  10   12.21   34.70
   1 -22  10   16.62   13.49
  -1 -22 -10   34.08   23.17
  -1 -22 -10   22.62   13.56
   1  22  10   38.80   22.99
   1  22  10   13.56   25.46
  -1  22 -10    8.39   15.09
  -1  22 -10   32.10   26.76
   1 -22  11  105.20   43.45
   1 -22  11   53.73   22.01
  -1 -22 -11   42.22   21.36
  -1 -22 -11   48.64   24.04
   1  22  11   90.81   36.80
   1  22  11   63.73   23.62
  -1  22 -11   82.30   28.55
  -1  22 -11   53.97   20.71
   1 -22  12  -12.15   42.95
   1 -22  12  -24.64   23.22
  -1 -22 -12   24.35   29.28
  -1 -22 -12  -28.53   24.21
   1  22  12   38.44   32.89
   1  22  12    2.40   26.65
  -1  22 -12    5.83   32.22
  -1  22 -12    8.60   25.18
   1 -23 -13  112.50   23.79
   1 -23 -13   99.66   25.91
  -1 -23  13   77.69   25.92
  -1 -23  13   18.88   48.47
   1  23 -13   80.79   34.40
   1  23 -13  114.30   25.20
  -1  23  13   59.08   27.27
  -1  23  13   86.67   27.88
   1 -23 -12    6.06   27.18
   1 -23 -12   -8.91   19.03
  -1 -23  12    0.41   48.55
  -1 -23  12    1.54   21.32
   1  23 -12   -7.52   17.46
   1  23 -12    3.52   27.24
  -1  23  12    0.25   29.24
  -1  23  12   -8.52   34.55
   1 -23 -11   12.70   25.84
   1 -23 -11    8.65   20.88
  -1 -23  11   10.65   22.81
  -1 -23  11  -36.48   44.85
  -1  23  11   11.49   28.98
  -1  23  11   23.15   32.70
   1 -23 -10   41.53   18.02
   1 -23 -10   34.22   26.49
  -1 -23  10   40.90   16.86
  -1 -23  10   27.04   38.64
   1  23 -10   21.64   15.62
   1  23 -10   22.44   20.54
  -1  23  10   -3.43   30.93
  -1  23  10   41.05   27.43
   1 -23  -9  156.00   18.24
   1 -23  -9  119.00   24.33
  -1 -23   9  114.60   22.78
  -1 -23   9   87.41   36.74
   1  23  -9  160.00   28.74
   1  23  -9  145.20   21.36
  -1  23   9  179.40   27.72
  -1  23   9  124.70   30.51
   1 -23  -8  111.10   21.99
   1 -23  -8   86.87   17.25
  -1 -23   8   49.64   34.80
  -1 -23   8   54.20   18.59
   1  23  -8   76.41   17.45
   1  23  -8  106.50   24.89
  -1  23   8   85.31   24.87
  -1  23   8   69.57   21.54
   1 -23  -7   63.76   14.67
   1 -23  -7   27.12   17.43
  -1 -23   7   46.54   30.09
  -1 -23   7   31.67   11.62
   1  23  -7   61.48   17.45
   1  23  -7   19.15   18.49
  -1  23   7   44.07   19.02
  -1  23   7   52.58   26.39
   1 -23  -6   -7.42   12.88
   1 -23  -6    6.92   15.15
  -1 -23   6   -4.60   23.33
  -1 -23   6   22.46   11.54
   1  23  -6   10.26   15.83
   1  23  -6  -10.51   11.45
  -1  23   6   11.68   14.13
  -1  23   6   23.19   18.41
   1 -23  -5  608.10   52.58
   1 -23  -5  621.70   52.85
  -1 -23   5  783.80   66.98
  -1 -23   5  601.40   50.18
   1  23  -5  571.30   49.17
   1  23  -5  611.20   51.29
  -1  23   5  588.60   51.33
  -1  23   5  798.10   67.64
   1 -23  -4   -4.14   12.54
   1 -23  -4    9.38   11.80
  -1 -23   4    1.93    8.44
  -1 -23   4    1.93   16.59
   1  23  -4   10.06   12.89
   1  23  -4    2.36    9.95
  -1  23   4   -2.50   12.54
  -1  23   4   -4.35   16.93
   1 -23  -3   74.38   12.57
   1 -23  -3   58.01   15.87
  -1 -23   3   70.44   16.89
  -1 -23   3   73.23   10.52
   1  23  -3   74.25   11.66
   1  23  -3  100.80   15.15
  -1  23   3   59.17   19.30
  -1  23   3   76.84   13.86
   1 -23  -2  127.90   19.58
   1 -23  -2  107.20   14.09
  -1 -23   2  124.20   13.80
  -1 -23   2  154.10   19.64
   1  23  -2  146.30   18.23
   1  23  -2  149.90   15.36
  -1  23   2  102.00   13.13
  -1  23   2   88.77   17.99
   1 -23  -1 2243.00  180.70
   1 -23  -1 1955.00  158.80
  -1 -23   1 1940.00  157.30
  -1 -23   1 1956.00  157.50
   1  23  -1 1804.00  146.40
   1  23  -1 1586.00  127.90
  -1  23   1 1534.00  125.20
  -1  23   1 2047.00  166.10
  -1  23   1 1746.00  141.00
   1 -23   0   78.73   12.60
   1 -23   0  116.40   19.38
  -1 -23   0   56.55   10.55
  -1 -23   0   86.41   15.99
   1  23   0  103.00   17.32
   1  23   0   68.29   10.15
  -1  23   0   93.42   12.75
  -1  23   0  118.10   17.97
   1 -23   1  683.20   56.58
   1 -23   1  785.10   65.83
  -1 -23  -1  777.50   63.91
  -1 -23  -1  661.70   56.11
   1  23   1  848.80   71.37
   1  23   1  660.10   54.61
  -1  23  -1  658.30   55.97
  -1  23  -1  664.50   55.13
   1 -23   2   34.04    9.60
   1 -23   2    3.97   15.44
  -1 -23  -2    2.93   11.49
  -1 -23  -2   21.81    9.43
   1  23   2   30.64   16.35
   1  23   2    6.65   10.13
  -1  23  -2   22.99   13.57
  -1  23  -2   24.31   10.08
   1 -23   3  160.80   23.25
  -1 -23  -3  147.50   17.53
  -1 -23  -3  195.40   19.99
   1  23   3  181.70   22.97
   1  23   3  169.50   18.50
  -1  23  -3  190.70   19.94
  -1  23  -3  131.60   18.36
   1 -23   4    4.76    9.72
   1 -23   4  -16.38   17.88
  -1 -23  -4    7.19   11.35
  -1 -23  -4   -0.80   11.05
   1  23   4  -12.72   16.75
   1  23   4    2.18   11.40
  -1  23  -4  -19.54   14.29
  -1  23  -4    3.65   11.68
   1 -23   5  567.20   47.82
   1 -23   5  580.60   53.44
  -1 -23  -5  539.90   46.66
  -1 -23  -5  516.80   44.58
   1  23   5  447.20   40.27
  -1  23  -5  377.10   36.04
  -1  23  -5  409.80   36.17
   1 -23   6   95.61   26.02
   1 -23   6  118.90   17.71
  -1 -23  -6   70.66   16.30
  -1 -23  -6   62.20   15.26
   1  23   6   46.70   20.93
   1  23   6  104.10   16.08
  -1  23  -6   75.83   18.77
  -1  23  -6   67.75   14.19
   1 -23   7   -6.99   25.89
   1 -23   7    6.27   14.22
  -1 -23  -7   12.66   14.51
  -1 -23  -7   11.51   18.82
   1  23   7    0.13   19.34
   1  23   7    9.05   20.97
  -1  23  -7   10.80   18.89
  -1  23  -7  -13.88   13.50
   1 -23   8    8.13   30.36
   1 -23   8   -3.02   11.04
  -1 -23  -8   15.58   15.58
  -1 -23  -8   -0.67   20.07
   1  23   8   -8.78   23.94
   1  23   8   -1.60   21.68
  -1  23  -8    5.51   14.08
  -1  23  -8  -31.46   21.78
   1 -23   9  285.20   38.83
   1 -23   9  302.60   28.90
  -1 -23  -9  423.40   43.05
  -1 -23  -9  370.50   35.69
   1  23   9  356.70   41.11
   1  23   9  372.40   36.66
  -1  23  -9  407.90   42.64
  -1  23  -9  295.00   29.94
   1 -23  10  -16.54   19.21
   1 -23  10    7.53   33.54
  -1 -23 -10  -19.13   19.78
  -1 -23 -10  -10.46   18.16
   1  23  10  -13.27   29.89
   1  23  10   16.38   29.35
  -1  23 -10    4.99   18.66
  -1  23 -10    5.80   19.57
   1 -23  11   13.16   43.11
   1 -23  11   22.05   23.14
  -1 -23 -11   11.36   20.88
  -1 -23 -11   34.88   20.13
   1  23  11   -2.68   26.91
   1  23  11    0.67   30.07
  -1  23 -11   11.39   23.65
  -1  23 -11   -6.46   14.20
   1 -23  12  -45.12   45.08
   1 -23  12   -8.37   26.31
  -1 -23 -12    6.02   33.95
  -1 -23 -12   -4.79   21.12
   1  23  12   38.59   38.26
   1  23  12  -48.33   35.54
  -1  23 -12    2.97   18.07
  -1  23 -12   -9.65   25.22
   1 -24 -13   54.47   27.37
   1 -24 -13   23.36   26.80
  -1 -24  13   50.90   24.83
  -1 -24  13   28.13   37.43
   1  24 -13   36.82   29.96
   1  24 -13    3.67   23.63
  -1  24  13  -14.77   30.09
  -1  24  13   19.41   34.47
   1 -24 -12    7.43   22.86
   1 -24 -12   -8.41   25.66
  -1 -24  12  -23.96   35.74
  -1 -24  12  -19.17   28.19
   1  24 -12   34.65   28.87
   1  24 -12   -0.16   24.59
  -1  24  12   45.93   35.41
  -1  24  12   20.95   28.52
   1 -24 -11   68.88   18.76
   1 -24 -11  102.60   25.45
  -1 -24  11  109.20   27.52
  -1 -24  11   41.07   46.21
   1  24 -11  131.40   34.69
   1  24 -11   87.41   18.35
  -1  24  11   69.31   31.72
  -1  24  11   84.43   25.38
   1 -24 -10  126.00   28.31
   1 -24 -10  149.60   20.73
  -1 -24  10  173.30   37.66
  -1 -24  10  180.20   26.33
   1  24 -10  145.50   25.41
   1  24 -10  131.30   23.05
  -1  24  10  115.00   33.49
  -1  24  10  141.00   27.62
   1 -24  -9    9.39   16.81
   1 -24  -9  -15.08   21.87
  -1 -24   9    7.10   19.81
  -1 -24   9  -16.76   37.09
   1  24  -9    4.62   16.61
   1  24  -9  -18.56   26.12
  -1  24   9    2.68   24.36
  -1  24   9   19.82   29.16
   1 -24  -8   98.05   17.68
   1 -24  -8   59.42   20.79
  -1 -24   8  109.30   20.76
  -1 -24   8   74.94   35.33
   1  24  -8   59.16   24.13
   1  24  -8  117.20   19.26
  -1  24   8   45.60   18.25
  -1  24   8   99.57   29.70
   1 -24  -7   80.87   20.74
   1 -24  -7   78.32   17.21
  -1 -24   7   69.91   32.78
  -1 -24   7   45.09   13.80
   1  24  -7   72.05   19.70
   1  24  -7   93.08   21.70
  -1  24   7   92.78   20.38
  -1  24   7   73.86   26.81
   1 -24  -6  149.10   19.08
   1 -24  -6  108.40   18.83
  -1 -24   6  123.80   31.86
  -1 -24   6   80.23   14.01
   1  24  -6  122.80   20.30
   1  24  -6   81.75   15.18
  -1  24   6   69.03   24.33
  -1  24   6   77.11   17.59
   1 -24  -5   21.02   16.76
   1 -24  -5   25.82   13.50
  -1 -24   5   34.58   10.67
  -1 -24   5   22.87   18.39
   1  24  -5   33.75   14.80
   1  24  -5   36.36   11.88
  -1  24   5   24.03   12.52
  -1  24   5   13.68   22.10
   1 -24  -4  417.00   36.79
   1 -24  -4  344.70   32.72
  -1 -24   4  481.30   44.04
  -1 -24   4  435.50   37.06
   1  24  -4  452.00   39.58
   1  24  -4  417.70   36.18
  -1  24   4  515.70   48.26
  -1  24   4  413.90   36.65
   1 -24  -3  452.70   39.22
   1 -24  -3  647.40   55.60
  -1 -24   3  558.80   48.85
  -1 -24   3  609.00   50.44
   1  24  -3  531.40   44.59
   1  24  -3  590.60   50.43
  -1  24   3  514.30   47.36
  -1  24   3  480.60   41.70
   1 -24  -2   15.04   10.19
   1 -24  -2   70.76   18.21
  -1 -24   2   20.73   13.74
  -1 -24   2   42.06    9.59
   1  24  -2   48.75   13.38
   1  24  -2   51.99    9.70
  -1  24   2   30.63   10.42
  -1  24   2   58.21   16.15
   1 -24  -1  511.90   46.29
   1 -24  -1  493.00   42.24
  -1 -24   1  540.00   47.35
  -1 -24   1  531.60   44.48
   1  24  -1  503.10   43.97
   1  24  -1  508.30   42.64
  -1  24   1  469.90   42.75
  -1  24   1  464.90   39.43
   1 -24   0  785.80   64.80
   1 -24   0  714.00   61.45
  -1 -24   0  758.80   63.82
  -1 -24   0  630.60   52.29
   1  24   0  744.30   63.01
   1  24   0  726.60   59.68
  -1  24   0  686.70   58.93
  -1  24   0  642.90   53.37
   1 -24   1   90.73   13.06
   1 -24   1   93.60   17.07
  -1 -24  -1   82.77   15.88
  -1 -24  -1   87.52   12.70
   1  24   1   67.79   16.18
   1  24   1   92.58   12.95
  -1  24  -1   92.84   12.77
  -1  24  -1   70.35   15.17
   1 -24   2  107.90   13.02
   1 -24   2   73.26   17.98
  -1 -24  -2   70.51   14.93
  -1 -24  -2   88.45   12.92
   1  24   2   75.77   18.36
   1  24   2   88.84   14.20
  -1  24  -2   89.37   16.14
  -1  24  -2   99.03   13.92
   1 -24   3  821.70   70.61
   1 -24   3  820.50   67.58
  -1 -24  -3  798.50   66.20
  -1 -24  -3  834.20   69.58
   1  24   3  716.30   59.91
   1  24   3  764.90   65.19
  -1  24  -3  758.70   63.66
  -1  24  -3  757.60   62.73
   1 -24   4  657.60   58.37
   1 -24   4  676.30   56.29
  -1 -24  -4  703.30   58.92
  -1 -24  -4  640.50   54.34
   1  24   4  606.50   51.32
   1  24   4  682.40   59.47
  -1  24  -4  746.60   62.17
  -1  24  -4  537.30   47.11
   1 -24   5   27.63   10.22
  -1 -24  -5   29.84   16.00
   1  24   5   65.76   18.38
  -1  24  -5   50.54   17.59
  -1  24  -5   37.21   14.19
   1 -24   6   10.30   12.96
   1 -24   6   18.13   26.59
  -1 -24  -6    9.02   16.96
  -1 -24  -6   14.74   12.66
   1  24   6   33.98   18.24
   1  24   6    0.80   19.26
  -1  24  -6    8.36   19.29
  -1  24  -6   16.37   13.01
   1 -24   7   46.90   13.26
   1 -24   7   24.26   28.53
  -1 -24  -7   14.56   18.09
  -1 -24  -7   15.80   15.51
   1  24   7    9.08   24.28
   1  24   7    7.62   15.98
  -1  24  -7   28.24   13.05
  -1  24  -7   18.17   20.32
   1 -24   8  -11.89   27.35
   1 -24   8   21.01   15.10
  -1 -24  -8    8.19   10.93
  -1 -24  -8    7.64   20.04
   1  24   8   24.10   22.70
   1  24   8    7.28   23.05
  -1  24  -8   10.85   21.45
  -1  24  -8    0.62   14.92
   1 -24   9   14.45   36.73
   1 -24   9   -9.79   15.47
  -1 -24  -9  -13.31   24.25
  -1 -24  -9    3.65   12.40
   1  24   9    8.54   24.39
   1  24   9   -6.27   24.93
  -1  24  -9    2.65   23.69
  -1  24  -9   -4.99   13.71
   1 -24  10    4.73   39.41
   1 -24  10   54.51   18.13
  -1 -24 -10   33.99   27.11
  -1 -24 -10   53.47   20.31
   1  24  10   56.66   24.26
   1  24  10   62.51   32.31
  -1  24 -10   83.76   28.77
  -1  24 -10   82.05   16.21
   1 -24  11  119.10   34.92
   1 -24  11   36.81   18.41
  -1 -24 -11   61.45   20.45
  -1 -24 -11   20.29   29.02
   1  24  11   44.22   33.98
   1  24  11   96.28   38.77
  -1  24 -11   48.29   20.81
  -1  24 -11   85.13   32.46
   1 -24  12   28.29   20.40
   1 -24  12   27.56   35.92
  -1 -24 -12    2.43   35.83
  -1 -24 -12   65.67   31.09
   1  24  12    4.19   34.56
   1  24  12   22.41   33.17
  -1  24 -12  -32.26   44.51
  -1  24 -12   42.79   21.23
   1 -25 -13   17.52   28.14
   1 -25 -13   35.23   24.00
  -1 -25  13   -3.63   32.23
  -1 -25  13  -69.39   51.37
   1  25 -13   -1.22   21.16
   1  25 -13   14.92   32.45
  -1  25  13   17.13   33.00
  -1  25  13  -18.81   30.50
   1 -25 -12  205.70   31.39
   1 -25 -12   99.79   20.80
  -1 -25  12   97.92   50.93
  -1 -25  12  167.90   25.11
   1  25 -12  202.80   25.96
   1  25 -12  156.00   38.62
  -1  25  12  132.20   33.95
  -1  25  12  140.00   30.82
   1 -25 -11  -11.98   27.54
   1 -25 -11   -5.50   19.80
  -1 -25  11  -32.24   50.14
  -1 -25  11   10.50   18.73
   1  25 -11  -21.15   33.05
   1  25 -11  -18.33   21.72
  -1  25  11   26.24   36.84
  -1  25  11    5.19   34.02
   1 -25 -10   20.72   24.84
   1 -25 -10   -5.02   14.76
  -1 -25  10   40.47   45.78
  -1 -25  10   12.37   23.14
   1  25 -10   -4.26   20.19
   1  25 -10    5.94   29.82
  -1  25  10    5.12   28.62
  -1  25  10    0.54   27.25
   1 -25  -9   37.96   14.70
   1 -25  -9   51.00   22.71
  -1 -25   9   32.69   38.39
  -1 -25   9   35.31   15.20
   1  25  -9   60.76   18.62
   1  25  -9   27.93   23.59
  -1  25   9   59.07   25.29
  -1  25   9   58.72   18.24
   1 -25  -8   15.16   12.65
   1 -25  -8    5.76   21.21
  -1 -25   8   62.79   39.26
  -1 -25   8    4.22   17.63
   1  25  -8    8.01   15.68
   1  25  -8   22.39   22.79
  -1  25   8   25.21   29.25
  -1  25   8    4.43   20.49
   1 -25  -7   47.76   12.40
   1 -25  -7   42.34   20.11
  -1 -25   7   38.46   34.00
   1  25  -7   67.07   22.73
   1  25  -7   69.28   18.95
  -1  25   7   51.41   28.55
  -1  25   7   77.02   19.97
   1 -25  -6  816.30   69.05
   1 -25  -6  932.00   78.00
  -1 -25   6  897.40   74.17
  -1 -25   6  911.70   82.45
   1  25  -6  829.20   70.67
   1  25  -6  871.50   72.96
  -1  25   6  823.80   69.89
  -1  25   6  923.80   79.03
   1 -25  -5  339.90   33.89
   1 -25  -5  403.60   37.87
  -1 -25   5  345.70   35.99
  -1 -25   5  350.30   30.84
   1  25  -5  322.10   31.27
   1  25  -5  335.10   30.72
  -1  25   5  383.00   36.67
   1 -25  -4  233.70   25.95
   1 -25  -4  194.10   21.54
  -1 -25   4  169.20   17.34
  -1 -25   4  166.60   23.33
   1  25  -4  193.10   19.79
   1  25  -4  193.40   21.65
  -1  25   4  168.80   20.31
  -1  25   4  194.60   27.90
   1 -25  -3   46.61   14.43
   1 -25  -3   73.68   15.29
  -1 -25   3   58.48   10.49
  -1 -25   3   34.30   16.47
   1  25  -3   75.32   11.72
   1  25  -3   49.35   13.66
  -1  25   3   70.58   19.75
  -1  25   3   63.24   14.02
   1 -25  -2 1007.00   84.27
   1 -25  -2 1113.00   90.91
  -1 -25   2  990.70   82.33
  -1 -25   2 1155.00   93.75
   1  25  -2 1196.00   96.97
   1  25  -2 1084.00   89.14
  -1  25   2 1045.00   87.01
  -1  25   2 1135.00   92.68
   1 -25  -1   -0.73   10.60
   1 -25  -1   -2.03   15.22
  -1 -25   1   -9.23   15.51
  -1 -25   1   -3.18    9.93
   1  25  -1   13.08    9.60
   1  25  -1   -8.94   14.11
  -1  25   1  -22.66   17.10
  -1  25   1    0.15   10.59
   1 -25   0   85.46   13.73
   1 -25   0   55.85   17.76
  -1 -25   0   55.34   15.46
  -1 -25   0   80.70   12.40
   1  25   0   70.44   11.53
   1  25   0   60.33   15.91
  -1  25   0   89.86   18.89
  -1  25   0   96.54   13.35
   1 -25   1   54.23   17.05
   1 -25   1   62.68   12.29
  -1 -25  -1   76.28   12.52
  -1 -25  -1   88.49   16.58
   1  25   1   64.87   16.47
   1  25   1   69.91   11.93
  -1  25  -1   59.88   14.91
  -1  25  -1   75.87   11.90
   1 -25   2  965.50   81.50
   1 -25   2  791.90   65.17
   1 -25   2 1010.00   84.37
  -1 -25  -2 1158.00   95.12
  -1 -25  -2  931.10   76.32
   1  25   2  976.90   81.75
   1  25   2 1149.00   93.68
  -1  25  -2  815.60   67.38
  -1  25  -2  933.40   77.91
   1 -25   3   27.37   17.33
   1 -25   3   43.46   10.36
  -1 -25  -3   36.37   12.42
  -1 -25  -3   40.95   13.56
   1  25   3   44.38   19.15
   1  25   3   47.51   13.75
  -1  25  -3   43.58   11.93
  -1  25  -3   52.67   16.12
   1 -25   4  136.40   16.04
   1 -25   4  187.30   26.50
  -1 -25  -4  160.40   19.25
  -1 -25  -4  152.40   19.42
   1  25   4  189.60   22.52
   1  25   4  105.90   21.47
  -1  25  -4  161.70   21.71
  -1  25  -4  124.70   16.89
   1 -25   5   -5.71   23.20
   1 -25   5    3.93   12.35
  -1 -25  -5    5.42   12.00
   1  25   5   -3.95   16.12
   1  25   5   25.78   21.82
  -1  25  -5  -15.82   17.11
  -1  25  -5   -7.20   13.45
   1 -25   6  597.30   50.78
   1 -25   6  661.30   63.66
  -1 -25  -6  633.20   53.79
  -1 -25  -6  659.00   56.58
   1  25   6  597.80   55.44
   1  25   6  748.80   64.41
  -1  25  -6  793.00   68.67
  -1  25  -6  556.80   48.85
   1 -25   7   -2.48   13.09
   1 -25   7   41.30   26.96
  -1 -25  -7   -2.52   20.11
  -1 -25  -7    5.32   10.95
   1  25   7   -7.48   23.59
   1  25   7   -5.55   20.40
  -1  25  -7    6.96   14.71
  -1  25  -7   -6.97   20.27
   1 -25   8   82.88   18.40
   1 -25   8   77.90   30.70
  -1 -25  -8   73.00   16.32
  -1 -25  -8   76.00   20.46
   1  25   8  108.30   25.38
   1  25   8  117.10   28.30
  -1  25  -8  106.50   18.48
  -1  25  -8  107.00   21.61
   1 -25   9    0.57   28.62
   1 -25   9   56.76   19.68
  -1 -25  -9    5.97   22.98
  -1 -25  -9   42.65   18.32
   1  25   9   69.50   29.19
   1  25   9   29.90   26.51
  -1  25  -9   12.56   18.37
  -1  25  -9    5.11   17.43
   1 -25  10  111.60   31.57
   1 -25  10  157.80   21.52
  -1 -25 -10  148.40   31.27
  -1 -25 -10  116.10   18.04
   1  25  10  197.50   35.64
   1  25  10  180.80   35.48
  -1  25 -10  120.80   31.69
  -1  25 -10  197.70   26.89
   1 -25  11    3.67   25.29
   1 -25  11   26.98   50.79
  -1 -25 -11   11.18   31.54
  -1 -25 -11  -29.48   24.45
   1  25  11   22.82   28.84
   1  25  11   -6.03   32.57
  -1  25 -11   30.67   20.63
  -1  25 -11   -6.75   21.87
   1 -25  12   48.19   36.76
   1 -25  12   60.05   30.04
  -1 -25 -12   35.31   21.88
  -1 -25 -12   43.66   34.86
   1  25  12   -4.68   27.78
   1  25  12   75.39   39.02
  -1  25 -12   50.59   27.29
  -1  25 -12   47.28   27.69
   1 -26 -13   -5.71   27.34
  -1 -26  13   10.81   22.84
   1  26 -13   28.35   29.80
  -1  26  13   38.80   42.44
   1 -26 -12   19.46   25.36
   1 -26 -12   -0.69   25.68
  -1 -26  12   25.39   25.41
  -1 -26  12  -30.04   42.72
   1  26 -12   51.47   26.49
   1  26 -12   -1.61   25.62
  -1  26  12   -7.28   30.34
  -1  26  12   35.26   39.73
   1 -26 -11  189.00   26.56
   1 -26 -11  149.00   32.74
  -1 -26  11  132.60   25.34
  -1 -26  11  145.50   56.32
   1  26 -11   99.29   27.44
   1  26 -11  115.80   19.80
  -1  26  11  135.30   30.67
  -1  26  11  118.70   37.12
   1 -26 -10   13.37   18.02
   1 -26 -10   27.22   20.85
  -1 -26  10    3.73   17.90
  -1 -26  10  -60.75   45.83
  -1  26  10   17.85   27.83
  -1  26  10   15.55   27.18
   1 -26  -9   56.33   22.88
   1 -26  -9   78.26   17.92
  -1 -26   9   56.83   19.81
  -1 -26   9   61.90   38.16
   1  26  -9   86.99   24.95
   1  26  -9   30.78   19.10
  -1  26   9   31.40   30.07
  -1  26   9   48.23   24.88
   1 -26  -8   11.87   20.14
   1 -26  -8  -10.70   15.88
  -1 -26   8   32.34   33.79
  -1 -26   8   13.35   12.94
   1  26  -8   14.97   19.10
   1  26  -8   16.54   18.02
  -1  26   8    0.13   20.07
  -1  26   8  -16.92   29.85
   1 -26  -7  255.00   28.84
  -1 -26   7  235.00   27.03
  -1 -26   7  358.10   50.44
   1  26  -7  196.50   29.22
   1  26  -7  198.70   26.20
  -1  26   7  279.90   30.82
  -1  26   7  236.30   35.98
   1 -26  -6  168.50   23.70
   1 -26  -6  108.60   17.25
  -1 -26   6  101.80   29.13
  -1 -26   6  156.80   18.88
   1  26  -6  139.40   22.56
   1  26  -6  183.40   22.90
  -1  26   6  195.30   31.12
  -1  26   6  173.70   21.71
   1 -26  -5  165.70   20.19
   1 -26  -5  124.30   18.53
  -1 -26   5  130.10   15.72
  -1 -26   5  187.00   28.11
   1  26  -5  118.20   19.09
   1  26  -5  154.60   19.27
  -1  26   5  174.50   21.94
   1 -26  -4  169.90   20.00
   1 -26  -4  195.00   23.46
  -1 -26   4  160.20   24.61
  -1 -26   4  170.50   17.61
   1  26  -4  228.50   24.29
   1  26  -4  209.80   21.45
  -1  26   4  224.70   29.47
  -1  26   4  158.50   20.88
   1 -26  -3  263.40   25.68
   1 -26  -3  295.50   30.12
  -1 -26   3  308.80   27.44
  -1 -26   3  292.00   30.81
  -1 -26   3  289.60   30.32
   1  26  -3  338.30   30.26
   1  26  -3  272.30   27.44
  -1  26   3  246.30   24.11
  -1  26   3  259.20   30.30
   1 -26  -2   18.91   11.22
   1 -26  -2   13.54   17.26
  -1 -26   2   15.61    9.24
  -1 -26   2    0.05   16.48
   1  26  -2    9.62    9.41
   1  26  -2    4.17   14.00
  -1  26   2    4.93   15.75
  -1  26   2   -0.46   11.16
   1 -26  -1  223.10   22.32
   1 -26  -1  158.40   23.53
  -1 -26   1  206.40   25.66
  -1 -26   1  173.20   18.43
   1  26  -1  118.40   19.16
   1  26  -1  127.00   15.00
  -1  26   1  156.20   17.51
  -1  26   1  172.90   23.60
   1 -26   0  461.70   40.12
   1 -26   0  385.10   37.69
  -1 -26   0  450.60   38.77
  -1 -26   0  522.70   46.55
   1  26   0  364.00   31.79
   1  26   0  461.80   42.33
  -1  26   0  427.60   40.16
  -1  26   0  418.20   36.20
   1 -26   1  743.20   63.94
   1 -26   1  812.80   67.16
  -1 -26  -1  991.40   81.25
  -1 -26  -1 1046.00   86.45
   1  26   1  889.80   74.37
   1  26   1  817.00   67.29
  -1  26  -1  801.00   66.24
  -1  26  -1  713.80   61.45
   1 -26   2    0.28    9.68
   1 -26   2   19.62   17.76
   1 -26   2    7.51   18.17
  -1 -26  -2  -11.98   13.42
  -1 -26  -2    9.99   11.39
   1  26   2   -8.15   11.34
   1  26   2  -11.35   17.94
  -1  26  -2   20.58   10.83
  -1  26  -2    9.40   15.54
   1 -26   3  338.00   30.33
   1 -26   3  403.10   40.71
  -1 -26  -3  360.70   33.95
  -1 -26  -3  454.60   39.81
   1  26   3  396.60   35.72
   1  26   3  399.70   39.48
  -1  26  -3  368.10   34.69
  -1  26  -3  464.10   40.18
   1 -26   4  126.70   25.14
   1 -26   4  192.20   20.50
  -1 -26  -4  216.80   23.85
  -1 -26  -4  211.60   23.27
   1  26   4  178.10   26.68
   1  26   4  164.70   18.52
  -1  26  -4  218.10   24.81
  -1  26  -4  225.10   23.63
   1 -26   5  172.80   20.22
   1 -26   5  173.40   29.88
  -1 -26  -5  176.60   21.86
  -1 -26  -5  169.70   22.10
   1  26   5  229.00   30.82
   1  26   5  123.70   19.56
  -1  26  -5  176.90   21.55
  -1  26  -5  185.70   25.40
   1 -26   6  409.40   45.91
   1 -26   6  402.00   36.51
  -1 -26  -6  312.90   32.79
  -1 -26  -6  394.80   36.82
   1  26   6  316.90   37.19
   1  26   6  281.20   27.93
  -1  26  -6  299.90   30.22
  -1  26  -6  369.80   37.28
   1 -26   7  368.20   34.99
   1 -26   7  436.30   48.06
  -1 -26  -7  394.60   39.45
  -1 -26  -7  501.20   44.37
   1  26   7  414.50   41.14
   1  26   7  375.20   42.67
  -1  26  -7  449.40   40.33
  -1  26  -7  454.40   43.57
   1 -26   8   55.35   30.59
   1 -26   8   97.65   16.36
  -1 -26  -8   80.59   24.10
  -1 -26  -8  125.40   19.16
   1  26   8  110.40   21.46
   1  26   8   61.58   28.15
  -1  26  -8   85.74   25.45
  -1  26  -8   75.82   19.34
   1 -26   9   25.11   36.44
   1 -26   9  -11.51   16.52
  -1 -26  -9   13.20   17.80
  -1 -26  -9   16.36   25.85
   1  26   9   43.01   30.16
   1  26   9    0.60   24.86
  -1  26  -9    3.75   14.74
  -1  26  -9  -23.91   26.52
   1 -26  10  142.90   27.48
   1 -26  10  166.20   46.22
  -1 -26 -10  187.20   29.60
  -1 -26 -10  164.60   25.55
   1  26  10  163.90   34.17
   1  26  10  164.00   30.17
  -1  26 -10  159.50   23.62
  -1  26 -10  141.80   25.62
   1 -26  11  139.20   47.94
   1 -26  11  189.40   26.15
  -1 -26 -11  143.80   21.98
  -1 -26 -11  117.80   33.86
   1  26  11  212.60   43.72
   1  26  11  176.30   31.08
  -1  26 -11  170.40   36.19
  -1  26 -11  153.30   22.84
   1 -26  12   30.97   23.45
   1 -26  12   54.64   53.92
  -1 -26 -12    4.93   32.00
  -1 -26 -12   33.13   31.23
   1  26  12   18.05   36.44
   1  26  12    3.05   26.79
  -1  26 -12  -15.75   19.79
  -1  26 -12    5.79   39.35
   1 -27 -12    5.57   19.30
   1 -27 -12   -8.25   25.38
  -1 -27  12  -56.88   44.08
  -1 -27  12    9.27   27.09
   1  27 -12    7.06   19.11
  -1  27  12   18.33   34.97
  -1  27  12   21.42   33.90
   1 -27 -11   25.15   20.58
   1 -27 -11   61.10   30.14
  -1 -27  11   21.30   27.36
  -1 -27  11   21.39   50.08
   1  27 -11   32.56   23.01
   1  27 -11   10.04   34.33
  -1  27  11   -7.74   35.57
  -1  27  11   51.02   38.38
   1 -27 -10  -11.80   25.29
   1 -27 -10    1.66   13.20
  -1 -27  10   45.90   20.57
  -1 -27  10  -20.96   44.14
   1  27 -10   -7.43   21.25
   1  27 -10  -18.28   24.98
  -1  27  10   33.33   33.41
  -1  27  10  -11.28   28.53
   1 -27  -9  331.00   32.63
   1 -27  -9  336.90   38.03
  -1 -27   9  317.60   49.68
  -1 -27   9  410.50   41.46
   1  27  -9  457.80   47.83
   1  27  -9  412.30   41.10
  -1  27   9  412.40   39.28
  -1  27   9  331.60   42.76
   1 -27  -8    7.33   13.49
   1 -27  -8    9.99   19.90
  -1 -27   8   15.34   36.45
  -1 -27   8    8.23   18.93
   1  27  -8    2.51   24.57
   1  27  -8   13.66   19.29
  -1  27   8   -2.54   21.69
  -1  27   8   -0.79   30.53
   1 -27  -7   69.04   13.73
   1 -27  -7   68.24   21.08
  -1 -27   7   35.78   19.80
  -1 -27   7   55.84   34.63
   1  27  -7   61.73   18.54
   1  27  -7   74.10   25.07
  -1  27   7  106.80   21.15
  -1  27   7   60.68   29.68
   1 -27  -6   45.92   17.17
   1 -27  -6   50.99   19.88
  -1 -27   6   72.65   29.08
  -1 -27   6   32.76   13.73
   1  27  -6   64.06   18.71
   1  27  -6   39.88   20.89
  -1  27   6   71.75   29.05
  -1  27   6   46.21   18.44
   1 -27  -5  728.70   62.04
   1 -27  -5  961.50   80.87
  -1 -27   5  737.60   61.38
  -1 -27   5  783.20   70.68
   1  27  -5  785.40   65.85
   1  27  -5  760.60   64.86
  -1  27   5  735.00   67.19
  -1  27   5  732.00   62.20
   1 -27  -4    0.81   13.95
   1 -27  -4    9.75   15.05
  -1 -27   4   14.93   20.54
  -1 -27   4    8.04    9.75
   1  27  -4    0.14   11.79
   1  27  -4   19.49   15.67
  -1  27   4    7.56   14.88
  -1  27   4   -1.08   23.03
   1 -27  -3  222.10   23.05
   1 -27  -3  277.20   29.62
  -1 -27   3  209.10   25.68
  -1 -27   3  212.60   20.59
  -1 -27   3  204.40   25.22
   1  27  -3  307.00   29.66
   1  27  -3  269.20   25.03
  -1  27   3  229.20   28.43
   1 -27  -2   96.52   17.75
   1 -27  -2  138.30   17.72
  -1 -27   2  135.50   21.30
  -1 -27   2  112.50   14.18
   1  27  -2   74.53   17.09
   1  27  -2  133.90   15.37
  -1  27   2  116.10   16.45
  -1  27   2  103.80   19.01
   1 -27  -1  628.90   53.21
  -1 -27   1  787.80   67.46
  -1 -27   1  698.30   58.16
   1  27  -1  778.50   65.99
   1  27  -1  788.70   64.80
  -1  27   1  627.10   55.10
  -1  27   1  752.10   62.57
   1 -27   0   17.28   19.40
   1 -27   0   11.76   10.34
  -1 -27   0   13.43   15.83
  -1 -27   0   25.99   11.68
   1  27   0   29.50   17.25
   1  27   0   13.48   11.48
  -1  27   0  -11.58   17.29
  -1  27   0   27.63   11.56
   1 -27   1  593.40   50.12
   1 -27   1  545.70   49.72
  -1 -27  -1  682.40   58.50
  -1 -27  -1  497.50   42.65
   1  27   1  578.70   48.72
   1  27   1  597.10   52.60
  -1  27  -1  513.30   43.88
  -1  27  -1  671.00   59.06
   1 -27   2  297.40   27.12
   1 -27   2  248.80   28.85
   1 -27   2  207.20   26.70
  -1 -27  -2  325.60   30.18
  -1 -27  -2  312.00   30.85
   1  27   2  268.80   30.59
   1  27   2  290.50   27.50
  -1  27  -2  307.10   30.94
  -1  27  -2  241.50   23.64
   1 -27   3  314.90   34.68
   1 -27   3  307.10   28.35
  -1 -27  -3  250.50   25.60
  -1 -27  -3  332.80   30.72
   1  27   3  363.70   33.19
   1  27   3  388.90   38.69
  -1  27  -3  288.00   29.86
  -1  27  -3  322.40   30.30
   1 -27   4   48.16   24.75
   1 -27   4   11.33   11.25
  -1 -27  -4    5.07   14.72
  -1 -27  -4    0.95   14.59
   1  27   4   17.48   21.41
   1  27   4   12.98   15.52
  -1  27  -4  -18.35   13.99
  -1  27  -4  -14.61   16.81
   1 -27   5  673.20   57.02
   1 -27   5  796.80   72.11
  -1 -27  -5  701.90   60.38
  -1 -27  -5  670.20   58.08
   1  27   5  709.60   63.53
   1  27   5  694.80   59.59
  -1  27  -5  691.00   60.49
  -1  27  -5  610.30   52.58
   1 -27   6  329.00   38.30
   1 -27   6  277.90   28.00
  -1 -27  -6  231.70   24.23
  -1 -27  -6  271.00   29.20
   1  27   6  201.40   31.98
   1  27   6  305.80   32.73
  -1  27  -6  276.50   28.56
  -1  27  -6  266.30   30.28
   1 -27   7   51.06   34.47
   1 -27   7   18.60   14.84
  -1 -27  -7   36.54   21.91
  -1 -27  -7    8.00   15.26
   1  27   7    9.31   23.85
   1  27   7   12.30   19.00
  -1  27  -7    7.36   16.44
  -1  27  -7   18.45   21.68
   1 -27   8  -12.96   16.65
   1 -27   8   -2.55   31.40
  -1 -27  -8   -0.12   11.21
  -1 -27  -8   26.97   22.83
   1  27   8  -32.84   31.13
   1  27   8   -7.41   23.94
  -1  27  -8   29.87   17.12
  -1  27  -8   16.13   21.11
   1 -27   9  333.00   34.02
   1 -27   9  296.20   41.94
  -1 -27  -9  277.70   29.30
  -1 -27  -9  329.50   39.01
   1  27   9  328.80   40.30
   1  27   9  312.00   39.84
  -1  27  -9  301.60   34.35
  -1  27  -9  305.30   35.23
   1 -27  10  -36.66   42.87
   1 -27  10   13.40   15.06
  -1 -27 -10   19.76   15.29
  -1 -27 -10  -24.79   22.93
   1  27  10   52.65   36.53
   1  27  10  -32.01   32.45
  -1  27 -10  -48.94   31.37
  -1  27 -10   39.05   21.08
   1 -27  11   24.03   23.82
   1 -27  11  -15.39   32.93
  -1 -27 -11  -41.33   26.87
  -1 -27 -11   -7.04   24.96
   1  27  11   22.86   25.79
   1  27  11    5.03   31.02
  -1  27 -11    4.67   25.93
  -1  27 -11   14.81   25.13
   1 -27  12   37.43   52.22
   1 -27  12  -21.87   34.19
  -1 -27 -12  -13.73   23.84
  -1 -27 -12   -7.97   25.10
   1  27  12   39.76   37.67
   1  27  12   -0.47   29.72
  -1  27 -12    7.42   26.22
  -1  27 -12  -11.18   20.73
   1 -28 -12   34.31   27.10
   1 -28 -12    6.28   27.30
  -1 -28  12   28.00   46.30
  -1 -28  12   22.22   24.64
   1  28 -12   -0.47   26.83
   1  28 -12   21.73   28.52
  -1  28  12   18.71   36.21
  -1  28  12   -1.62   36.05
   1 -28 -11   31.78   21.82
   1 -28 -11   23.56   30.82
  -1 -28  11   56.93   51.68
  -1 -28  11   31.15   20.22
   1  28 -11   32.59   19.94
   1  28 -11   52.31   28.88
  -1  28  11   11.25   25.44
  -1  28  11   83.99   37.15
   1 -28 -10  184.10   24.74
   1 -28 -10  125.10   28.52
  -1 -28  10  178.90   29.13
  -1 -28  10  113.20   47.45
   1  28 -10  131.10   34.47
   1  28 -10  189.40   28.94
  -1  28  10  214.70   33.52
  -1  28  10  142.50   38.13
   1 -28  -9   -8.75   17.28
   1 -28  -9   -1.05   24.66
   1  28  -9   34.00   20.74
   1  28  -9   29.65   27.68
  -1  28   9   31.11   26.86
  -1  28   9   26.99   33.57
   1 -28  -8  452.40   43.93
   1 -28  -8  370.60   35.51
  -1 -28   8  359.40   38.08
  -1 -28   8  337.10   50.65
   1  28  -8  367.50   38.00
   1  28  -8  420.70   45.51
  -1  28   8  430.40   48.97
  -1  28   8  389.90   38.65
   1 -28  -7   30.81   21.45
   1 -28  -7   26.38   17.17
  -1 -28   7   13.03   19.11
  -1 -28   7   10.42   32.74
   1  28  -7   25.61   23.95
   1  28  -7   20.72   18.14
  -1  28   7   22.67   27.22
  -1  28   7   32.09   17.46
   1 -28  -6  151.60   24.48
   1 -28  -6  142.40   18.95
  -1 -28   6  155.80   20.99
   1  28  -6  130.70   23.42
   1  28  -6  134.40   21.56
  -1  28   6  184.80   24.73
  -1  28   6  178.60   29.99
   1 -28  -5   16.37   17.58
   1 -28  -5    3.05   16.27
  -1 -28   5   37.69   27.48
  -1 -28   5   25.19   11.67
   1  28  -5   43.66   21.39
   1  28  -5   28.01   15.90
  -1  28   5   27.83   25.92
  -1  28   5   40.37   18.67
   1 -28  -4  395.50   39.23
   1 -28  -4  502.70   44.84
  -1 -28   4  511.20   48.32
  -1 -28   4  568.20   47.96
   1  28  -4  559.40   49.16
   1  28  -4  543.00   46.70
  -1  28   4  511.00   51.05
  -1  28   4  597.20   51.45
   1 -28  -3  228.90   27.84
   1 -28  -3  135.20   17.72
  -1 -28   3  197.70   26.36
  -1 -28   3  192.00   24.83
  -1 -28   3  201.20   20.37
   1  28  -3  260.00   25.06
   1  28  -3  223.30   24.58
  -1  28   3  159.00   25.91
  -1  28   3  211.20   22.37
   1 -28  -2   15.95   17.45
   1 -28  -2    6.30   12.51
  -1 -28   2    4.05   18.02
  -1 -28   2   14.53   10.70
   1  28  -2   -1.64   10.06
   1  28  -2   -2.11   16.24
  -1  28   2    7.95   16.00
  -1  28   2    7.58   12.89
  -1  28   2  -14.02   15.43
   1 -28  -1   85.51   21.03
   1 -28  -1   80.30   14.52
  -1 -28   1   92.62   21.42
  -1 -28   1   97.50   14.06
   1  28  -1   71.82   18.41
   1  28  -1   83.63   12.63
  -1  28   1   73.47   13.81
  -1  28   1   60.26   20.29
   1 -28   0  870.40   72.14
   1 -28   0  735.50   64.28
  -1 -28   0  941.80   77.53
  -1 -28   0 1061.00   88.41
   1  28   0  836.70   71.27
   1  28   0  992.50   81.17
  -1  28   0  797.50   68.07
  -1  28   0  802.70   66.38
   1 -28   1  156.00   24.68
   1 -28   1  103.20   14.06
  -1 -28  -1  100.70   19.14
  -1 -28  -1  137.80   17.22
   1  28   1   99.30   20.13
   1  28   1  122.10   21.50
   1  28   1  119.20   15.87
  -1  28  -1  129.90   24.70
  -1  28  -1  163.20   18.67
   1 -28   2  131.00   20.42
   1 -28   2  134.90   16.23
   1 -28   2  157.20   23.63
  -1 -28  -2  123.60   20.06
  -1 -28  -2   86.65   15.08
   1  28   2  114.30   21.56
   1  28   2  144.40   18.09
  -1  28  -2  104.00   15.41
  -1  28  -2  116.10   18.90
   1 -28   3  248.40   24.17
   1 -28   3  243.00   30.15
  -1 -28  -3  234.70   24.49
  -1 -28  -3  221.60   24.93
   1  28   3  225.00   29.44
   1  28   3  204.40   23.71
  -1  28  -3  242.70   27.26
  -1  28  -3  189.40   21.53
   1 -28   4  552.80   47.73
   1 -28   4  656.60   61.09
  -1 -28  -4  700.40   60.67
  -1 -28  -4  543.40   47.91
   1  28   4  666.50   61.72
  -1  28  -4  544.70   49.56
  -1  28  -4  582.50   50.47
   1 -28   5   17.45   13.62
   1 -28   5   -1.78   25.98
  -1 -28  -5   30.89   17.72
  -1 -28  -5   52.12   15.39
   1  28   5    4.94   17.42
   1  28   5   -1.92   24.12
  -1  28  -5   29.02   14.60
  -1  28  -5   15.34   20.39
   1 -28   6   85.43   28.27
   1 -28   6   79.80   16.86
  -1 -28  -6   71.98   21.84
  -1 -28  -6   53.92   16.94
   1  28   6   85.39   19.78
   1  28   6  101.60   29.29
  -1  28  -6   63.92   16.52
  -1  28  -6   70.19   20.79
   1 -28   7   71.51   15.55
   1 -28   7   37.49   31.99
  -1 -28  -7   55.42   21.78
  -1 -28  -7   53.96   14.62
   1  28   7   -3.25   28.87
   1  28   7   67.21   23.80
  -1  28  -7   59.05   22.63
  -1  28  -7   61.18   18.68
   1 -28   8  411.60   39.22
  -1 -28  -8  413.70   42.81
  -1 -28  -8  495.50   44.68
   1  28   8  314.40   33.60
   1  28   8  458.80   51.59
  -1  28  -8  290.80   35.54
  -1  28  -8  400.50   38.35
   1 -28   9  123.80   41.03
   1 -28   9   97.69   20.88
  -1 -28  -9   92.62   20.93
  -1 -28  -9   76.93   24.63
   1  28   9  123.90   28.68
   1  28   9  161.20   38.48
  -1  28  -9  129.10   30.40
  -1  28  -9   70.22   20.02
   1 -28  10   65.84   37.87
   1 -28  10  101.30   24.72
  -1 -28 -10   88.18   24.40
  -1 -28 -10   53.06   31.03
   1  28  10   66.89   37.48
   1  28  10   52.16   30.78
  -1  28 -10  104.30   25.92
  -1  28 -10   62.03   23.35
   1 -28  11   43.93   23.01
   1 -28  11   -3.11   47.27
  -1 -28 -11   11.14   17.83
  -1 -28 -11  -30.59   26.64
   1  28  11   50.07   41.92
   1  28  11   35.81   36.30
  -1  28 -11   10.89   20.42
  -1  28 -11  -15.13   33.96
   1 -28  12  116.00   26.77
   1 -28  12   28.81   37.52
  -1 -28 -12  124.20   28.65
  -1 -28 -12   87.89   36.33
   1  28  12   80.33   36.60
   1  28  12   68.55   38.51
  -1  28 -12  109.80   29.63
  -1  28 -12   99.06   37.85
   1 -29 -12  105.20   25.30
   1 -29 -12   59.92   30.12
  -1 -29  12   92.60   35.94
  -1 -29  12  150.20   34.24
   1  29 -12  119.50   38.27
   1  29 -12   76.74   21.62
  -1  29  12  124.80   39.31
  -1  29  12  108.60   48.64
   1 -29 -11  -35.24   31.50
   1 -29 -11   32.83   23.33
  -1 -29  11    2.57   49.22
  -1 -29  11  -20.20   28.60
   1  29 -11   -1.22   27.76
   1  29 -11    0.93   31.88
  -1  29  11   39.17   36.65
  -1  29  11   21.51   34.94
   1 -29 -10    0.86   26.98
   1 -29 -10   13.82   16.27
  -1 -29  10   61.37   19.16
  -1 -29  10   35.19   36.16
   1  29 -10   32.97   23.26
   1  29 -10   46.85   27.61
  -1  29  10   35.71   36.96
  -1  29  10   34.10   31.43
   1 -29  -9    9.27   15.98
   1 -29  -9   17.50   24.64
  -1 -29   9    8.16   18.41
  -1 -29   9   11.46   45.08
   1  29  -9    7.12   24.66
   1  29  -9   47.84   22.98
  -1  29   9   25.01   19.78
  -1  29   9   -5.47   34.64
   1 -29  -8  337.60   36.63
   1 -29  -8  382.20   35.33
  -1 -29   8  323.80   53.92
  -1 -29   8  379.70   39.68
   1  29  -8  381.60   42.32
   1  29  -8  308.40   34.21
  -1  29   8  280.60   33.18
  -1  29   8  291.60   40.84
   1 -29  -7   14.68   14.71
   1 -29  -7   18.00   19.80
  -1 -29   7   45.98   35.02
  -1 -29   7   11.58   18.66
   1  29  -7   25.83   25.41
   1  29  -7   10.06   18.78
  -1  29   7    6.38   20.27
  -1  29   7   14.20   28.10
   1 -29  -6  386.20   36.48
   1 -29  -6  462.90   42.36
  -1 -29   6  388.80   37.71
  -1 -29   6  325.60   47.35
   1  29  -6  385.70   41.47
   1  29  -6  344.00   34.81
  -1  29   6  418.50   46.79
  -1  29   6  405.20   36.85
   1 -29  -5   64.93   19.48
   1 -29  -5  138.00   20.71
  -1 -29   5   92.95   15.18
  -1 -29   5  116.20   30.83
   1  29  -5   81.53   18.91
   1  29  -5  109.90   21.33
  -1  29   5  123.70   20.92
  -1  29   5  168.10   33.86
   1 -29  -4  251.20   29.88
   1 -29  -4  269.90   28.43
  -1 -29   4  257.60   24.72
  -1 -29   4  289.00   36.44
   1  29  -4  277.20   29.88
   1  29  -4  227.90   24.07
  -1  29   4  310.30   29.38
  -1  29   4  233.90   33.25
   1 -29  -3   45.60   21.33
   1 -29  -3   26.38   14.02
  -1 -29   3   45.66   11.97
  -1 -29   3   43.30   19.78
   1  29  -3   38.92   17.44
   1  29  -3   28.02   12.15
  -1  29   3   44.07   24.04
  -1  29   3   18.82   13.20
   1 -29  -2  545.50   50.39
   1 -29  -2  802.30   67.15
  -1 -29   2  702.70   61.64
  -1 -29   2  700.30   58.14
   1  29  -2  789.70   67.28
   1  29  -2  802.20   66.56
  -1  29   2  669.80   59.55
  -1  29   2  601.20   54.12
  -1  29   2  666.80   56.28
   1 -29  -1  101.40   16.19
   1 -29  -1  167.70   25.76
  -1 -29   1   83.34   13.79
  -1 -29   1  148.90   25.23
   1  29  -1  118.00   19.44
   1  29  -1  153.00   16.89
  -1  29   1   97.81   22.37
  -1  29   1   84.31   14.54
   1 -29   0    8.97   12.12
   1 -29   0   -0.05   20.31
  -1 -29   0   14.23   11.59
  -1 -29   0   -3.58   17.62
   1  29   0    8.26   10.87
   1  29   0    5.07   17.26
  -1  29   0    9.51   11.62
  -1  29   0  -15.45   18.49
   1 -29   1  218.10   28.66
   1 -29   1  232.40   23.34
  -1 -29  -1  188.90   24.42
  -1 -29  -1  210.60   21.77
   1  29   1  166.80   24.15
   1  29   1  168.00   24.58
   1  29   1  158.60   18.74
  -1  29  -1  168.90   19.43
  -1  29  -1  202.90   27.73
   1 -29   2  880.20   72.71
   1 -29   2  906.40   77.75
  -1 -29  -2  778.60   66.72
   1  29   2  822.80   70.98
   1  29   2  989.10   81.59
  -1  29  -2  924.20   77.65
  -1  29  -2 1003.00   82.66
   1 -29   3  105.90   25.58
   1 -29   3   69.46   14.13
  -1 -29  -3   95.97   17.67
  -1 -29  -3   85.03   19.95
   1  29   3   83.74   23.31
   1  29   3   45.58   15.41
  -1  29  -3   89.50   16.74
  -1  29  -3   91.13   19.01
   1 -29   4  591.20   50.59
  -1 -29  -4  477.70   43.47
  -1  29  -4  553.30   48.24
  -1  29  -4  498.90   46.86
   1 -29   5   29.55   31.44
   1 -29   5    2.87   13.22
  -1 -29  -5   -7.71   19.68
  -1 -29  -5    9.56   17.09
   1  29   5   24.71   23.11
   1  29   5    6.48   17.69
  -1  29  -5   27.56   23.40
  -1  29  -5   32.27   16.96
   1 -29   6  226.90   34.37
   1 -29   6  220.40   24.72
  -1 -29  -6  201.40   22.44
  -1 -29  -6  215.80   26.14
   1  29   6  182.70   25.63
   1  29   6  183.90   33.92
  -1  29  -6  218.30   24.26
  -1  29  -6  165.60   25.61
   1 -29   7   -4.42   16.12
   1 -29   7   -4.61   27.81
  -1 -29  -7   20.10   17.02
  -1 -29  -7    5.11   22.22
   1  29   7   38.92   32.22
   1  29   7    6.62   20.07
  -1  29  -7    3.94   17.57
  -1  29  -7    0.34   23.82
   1 -29   8  315.60   45.54
   1 -29   8  270.60   28.65
  -1 -29  -8  297.70   36.37
  -1 -29  -8  264.60   26.04
   1  29   8  221.80   36.80
   1  29   8  221.20   32.24
  -1  29  -8  252.20   28.89
  -1  29  -8  321.90   36.86
   1 -29   9   65.98   18.24
   1 -29   9  133.10   42.66
  -1 -29  -9  101.80   29.24
  -1 -29  -9  121.70   20.40
   1  29   9  151.30   38.61
   1  29   9  148.70   33.82
  -1  29  -9  102.70   28.44
  -1  29  -9  160.50   25.77
   1 -29  10   35.42   46.22
   1 -29  10   15.83   19.18
  -1 -29 -10   10.56   16.32
  -1 -29 -10   44.48   30.69
   1  29  10    0.99   29.40
   1  29  10   41.90   40.09
  -1  29 -10   24.13   16.17
  -1  29 -10   13.10   32.48
   1 -29  11    5.87   47.60
   1 -29  11   14.99   24.30
  -1 -29 -11   25.55   25.78
  -1 -29 -11  -28.30   31.96
   1  29  11  -29.09   34.96
   1  29  11   35.49   39.62
  -1  29 -11  -29.20   28.17
  -1  29 -11  -19.77   20.02
   1 -30 -12    5.18   25.24
   1 -30 -12  -18.78   34.01
  -1 -30  12  -33.64   44.31
  -1 -30  12  -11.35   25.33
   1  30 -12    9.40   25.83
   1  30 -12   29.41   29.93
  -1  30  12  -42.88   31.54
  -1  30  12   43.16   41.89
   1 -30 -11  100.20   29.43
   1 -30 -11  100.70   21.29
  -1 -30  11  107.20   48.76
  -1 -30  11  135.70   24.71
   1  30 -11   59.19   32.68
   1  30 -11  116.90   23.07
  -1  30  11   92.42   34.10
  -1  30  11   57.23   31.45
   1 -30 -10   26.40   17.78
   1 -30 -10   34.23   27.98
  -1 -30  10   14.15   26.33
  -1 -30  10   46.04   49.35
   1  30 -10   68.61   34.25
   1  30 -10   90.14   25.89
  -1  30  10   55.53   35.72
  -1  30  10  108.60   26.04
   1 -30  -9   35.43   23.17
   1 -30  -9   13.26   19.88
  -1 -30   9  -45.22   46.41
  -1 -30   9    0.37   21.61
   1  30  -9   38.72   21.78
   1  30  -9  -27.73   30.15
  -1  30   9   -1.50   28.50
  -1  30   9   20.82   33.21
   1 -30  -8   45.18   16.83
   1 -30  -8   16.97   24.08
  -1 -30   8   48.60   22.57
   1  30  -8   44.32   29.05
   1  30  -8   11.61   20.84
  -1  30   8  -40.94   26.10
  -1  30   8    9.27   17.19
   1 -30  -7  228.40   26.23
   1 -30  -7  214.70   27.20
  -1 -30   7  220.60   29.61
  -1 -30   7  124.50   39.01
   1  30  -7  288.90   37.77
   1  30  -7  236.40   29.49
  -1  30   7  186.80   25.43
  -1  30   7  264.00   38.28
   1 -30  -6   47.99   18.67
   1 -30  -6   43.32   18.60
  -1 -30   6    0.39   39.87
  -1 -30   6   60.26   19.51
   1  30  -6   42.88   20.11
  -1  30   6   21.24   29.78
  -1  30   6   31.98   19.92
   1 -30  -5   22.75   18.63
   1 -30  -5   36.95   20.06
  -1 -30   5   10.15   27.31
  -1 -30   5   16.71   13.83
   1  30  -5   52.41   17.94
   1  30  -5   44.83   22.12
  -1  30   5    4.28   30.50
  -1  30   5   37.76   16.67
   1 -30  -4   75.48   21.48
   1 -30  -4  141.50   21.53
  -1 -30   4   98.74   14.77
  -1 -30   4   59.89   25.15
   1  30  -4   85.43   18.88
   1  30  -4  118.30   17.66
  -1  30   4  106.40   19.51
  -1  30   4  112.90   23.72
   1 -30  -3  899.40   77.37
   1 -30  -3  716.10   61.20
  -1 -30   3  929.70   79.39
  -1 -30   3  935.80   77.01
   1  30  -3  772.50   64.41
   1  30  -3  839.30   71.30
  -1  30   3  856.50   75.88
  -1  30   3  651.60   55.41
   1 -30  -2    7.14   14.62
  -1 -30   2   14.98   21.79
  -1 -30   2   22.09   11.16
   1  30  -2   -8.55   17.29
   1  30  -2   17.31   11.89
  -1  30   2   -0.74   21.45
  -1  30   2  -33.28   21.88
  -1  30   2   11.79   14.25
   1 -30  -1    1.06   14.03
   1 -30  -1   19.51   19.30
  -1 -30   1  -16.64   21.99
  -1 -30   1   26.69   13.19
   1  30  -1   10.61   11.66
   1  30  -1   14.88   17.88
  -1  30   1    5.15   20.82
  -1  30   1   20.10   12.89
   1 -30   0  195.70   29.08
   1 -30   0  143.30   18.40
  -1 -30   0  124.40   22.84
  -1 -30   0  126.80   16.87
   1  30   0   89.52   20.48
   1  30   0  124.40   16.33
  -1  30   0  108.20   23.22
  -1  30   0  127.10   16.83
   1 -30   1  486.80   42.62
   1 -30   1  563.10   52.57
  -1 -30  -1  417.70   37.26
  -1 -30  -1  518.60   47.39
   1  30   1  519.30   48.35
   1  30   1  400.10   39.66
   1  30   1  471.50   41.53
  -1  30  -1  565.90   51.31
  -1  30  -1  567.60   48.53
   1 -30   2   17.62   11.65
   1 -30   2   -9.48   22.21
  -1 -30  -2   16.57   13.29
  -1 -30  -2   23.97   19.03
   1  30   2    1.25   19.95
   1  30   2   12.39   14.14
  -1  30  -2   11.26   13.27
  -1  30  -2   23.93   16.82
   1 -30   3  974.70   80.72
   1 -30   3  953.20   81.87
   1 -30   3 1108.00   94.66
  -1 -30  -3  932.20   77.72
  -1 -30  -3 1131.00   94.35
   1  30   3 1141.00   96.53
   1  30   3  980.00   81.33
  -1  30  -3  853.50   72.87
  -1  30  -3  816.40   68.47
   1 -30   4  294.80   28.60
   1 -30   4  397.80   45.36
  -1 -30  -4  236.50   28.51
  -1 -30  -4  258.00   29.65
   1  30   4  250.40   27.15
   1  30   4  149.70   35.91
  -1  30  -4  239.70   30.13
  -1  30  -4  262.70   27.43
   1 -30   5    8.79   26.05
   1 -30   5    9.13   13.23
  -1 -30  -5  -14.19   17.12
  -1 -30  -5    7.52   21.38
   1  30   5  -13.96   15.44
   1  30   5  -52.12   28.48
  -1  30  -5   -8.18   20.28
  -1  30  -5   13.37   15.08
   1 -30   6   54.61   28.56
   1 -30   6   20.88   15.82
  -1 -30  -6   53.73   23.50
  -1 -30  -6   -3.86   16.29
   1  30   6   18.68   16.07
   1  30   6   21.39   25.14
  -1  30  -6   24.84   15.80
  -1  30  -6   11.65   20.92
   1 -30   7  167.10   34.35
   1 -30   7  174.10   21.50
  -1 -30  -7  190.00   28.88
  -1 -30  -7  167.40   21.62
   1  30   7  218.00   29.90
   1  30   7  136.20   34.45
  -1  30  -7  146.10   27.00
  -1  30  -7  170.70   22.44
   1 -30   8   29.15   20.35
   1 -30   8   18.55   30.50
  -1 -30  -8   30.01   22.42
  -1 -30  -8   10.10   18.24
   1  30   8   -1.38   33.08
   1  30   8   49.78   21.03
  -1  30  -8    9.27   20.62
  -1  30  -8   22.66   24.62
   1 -30   9   44.87   38.84
   1 -30   9   65.84   21.68
  -1 -30  -9   25.95   19.66
  -1 -30  -9   83.66   28.33
   1  30   9   11.96   32.24
   1  30   9   37.76   29.63
  -1  30  -9   26.25   22.28
  -1  30  -9   24.34   27.12
   1 -30  10   56.60   38.55
   1 -30  10   96.59   26.20
  -1 -30 -10   -5.88   25.87
  -1 -30 -10   31.78   24.48
   1  30  10   57.50   27.96
   1  30  10   66.32   32.05
  -1  30 -10   49.49   22.98
  -1  30 -10   51.53   25.30
   1 -30  11   30.46   33.29
  -1 -30 -11   53.52   34.40
  -1 -30 -11   49.08   21.47
   1  30  11   81.51   48.17
   1  30  11  122.60   40.99
  -1  30 -11   56.88   40.52
   1 -31 -12   13.31   34.08
   1 -31 -12    5.36   32.95
  -1 -31  12   42.16   31.87
  -1 -31  12  -13.33   33.15
   1  31 -12  -16.09   30.14
   1  31 -12  -14.76   41.97
  -1  31  12  -28.06   44.13
  -1  31  12  -19.61   44.37
   1 -31 -11    0.82   24.95
   1 -31 -11  -17.15   26.38
  -1 -31  11    2.88   27.07
  -1 -31  11  -63.68   42.67
   1  31 -11   27.13   26.36
   1  31 -11  -21.46   32.57
  -1  31  11    4.39   28.80
  -1  31  11   32.41   36.97
   1 -31 -10   35.97   27.25
   1 -31 -10   35.17   21.54
  -1 -31  10   71.12   51.64
  -1 -31  10   79.83   23.04
   1  31 -10   62.68   30.22
   1  31 -10   94.58   23.45
  -1  31  10   22.35   31.06
  -1  31  10   32.80   36.69
   1 -31  -9  275.50   33.48
  -1 -31   9  198.00   23.68
  -1 -31   9  204.60   47.60
   1  31  -9  246.20   33.61
   1  31  -9  213.90   29.33
  -1  31   9  202.10   32.48
  -1  31   9  190.60   37.07
   1 -31  -8  174.10   28.54
   1 -31  -8  151.10   23.04
  -1 -31   8  152.60   25.99
  -1 -31   8  121.90   43.52
  -1  31   8  103.70   32.54
  -1  31   8  160.10   26.86
   1 -31  -7   19.58   18.56
   1 -31  -7   38.82   21.35
  -1 -31   7   37.49   42.27
  -1 -31   7  -13.46   19.84
   1  31  -7   35.84   29.68
   1  31  -7  -11.36   20.30
  -1  31   7   14.10   35.06
  -1  31   7   28.66   20.89
   1 -31  -6   24.99   16.87
   1 -31  -6   -2.35   18.60
  -1 -31   6   56.74   38.78
  -1 -31   6    7.94   19.92
   1  31  -6   69.65   29.28
   1  31  -6   19.26   21.53
  -1  31   6    7.63   19.84
  -1  31   6   21.51   29.44
   1 -31  -5  456.00   43.20
  -1 -31   5  328.20   31.69
  -1 -31   5  290.60   44.24
   1  31  -5  273.90   31.64
   1  31  -5  312.10   35.19
  -1  31   5  308.60   41.54
  -1  31   5  407.90   38.82
   1 -31  -4  131.90   21.52
   1 -31  -4  160.00   24.75
  -1 -31   4  138.70   17.51
  -1 -31   4  147.60   33.65
  -1 -31   4  141.50   32.54
   1  31  -4  157.70   20.81
   1  31  -4  122.90   21.23
  -1  31   4  148.90   27.54
  -1  31   4  126.10   20.82
   1 -31  -3  324.30   31.76
   1 -31  -3  254.60   30.70
  -1 -31   3  366.30   32.82
  -1 -31   3  382.00   40.38
   1  31  -3  326.80   33.40
   1  31  -3  324.00   30.39
  -1  31   3  269.00   34.00
   1 -31  -2   52.64   20.90
   1 -31  -2   72.41   18.05
  -1 -31   2  106.50   15.45
  -1 -31   2   85.36   23.40
   1  31  -2  114.90   21.72
   1  31  -2   92.35   15.20
  -1  31   2   99.49   26.17
  -1  31   2   98.41   17.38
  -1  31   2   60.87   23.87
   1 -31  -1  807.40   68.23
  -1 -31   1  764.90   64.23
  -1 -31   1  876.60   76.11
   1  31  -1  612.50   55.00
  -1  31   1  500.10   48.25
   1 -31   0   53.48   25.94
   1 -31   0   32.54   15.16
  -1 -31   0   25.72   20.72
  -1 -31   0   59.99   15.00
   1  31   0   41.21   21.72
   1  31   0   24.89   13.21
  -1  31   0   43.45   12.93
  -1  31   0   56.94   22.03
   1 -31   1  858.90   71.71
   1 -31   1  827.70   73.20
  -1 -31  -1  906.00   76.96
  -1 -31  -1  776.80   65.19
   1  31   1  847.60   73.21
   1  31   1  808.00   70.37
   1  31   1  747.90   62.85
  -1  31  -1  760.70   66.26
  -1  31  -1  636.30   54.35
   1 -31   2   79.91   25.50
   1 -31   2  146.20   18.35
  -1 -31  -2  118.50   22.41
  -1 -31  -2  133.50   18.46
   1  31   2   89.06   16.47
   1  31   2  106.00   24.37
  -1  31  -2  107.10   20.53
  -1  31  -2  120.20   16.99
   1 -31   3  133.20   29.22
   1 -31   3  132.80   18.60
   1 -31   3  167.30   29.36
  -1 -31  -3  155.20   27.87
  -1 -31  -3  142.30   24.69
   1  31   3  136.20   28.67
  -1  31  -3  217.40   23.44
  -1  31  -3  188.80   26.31
   1 -31   4   21.10   13.65
   1 -31   4   28.26   27.45
  -1 -31  -4   19.51   18.30
  -1 -31  -4   26.04   19.59
   1  31   4   22.26   15.50
   1  31   4   16.34   32.26
  -1  31  -4  -15.81   21.68
  -1  31  -4   23.11   15.42
   1 -31   5  711.40   65.81
   1 -31   5  756.90   64.18
  -1 -31  -5  652.60   56.82
  -1 -31  -5  747.40   65.17
   1  31   5  552.10   49.61
  -1  31  -5  617.50   53.32
  -1  31  -5  488.00   47.38
   1 -31   6  -28.11   33.90
   1 -31   6   13.72   16.04
  -1 -31  -6   27.84   21.35
  -1 -31  -6  -12.84   13.16
   1  31   6  -15.27   30.44
   1  31   6   49.14   21.06
  -1  31  -6   12.83   22.41
  -1  31  -6   -3.23   15.58
   1 -31   7    5.95   17.47
   1 -31   7   68.32   31.48
  -1 -31  -7    1.71   16.47
  -1 -31  -7   -9.84   23.28
   1  31   7   23.59   34.74
   1  31   7   31.90   22.09
  -1  31  -7   11.87   23.64
  -1  31  -7   24.79   18.14
   1 -31   8  -40.73   36.29
   1 -31   8   -1.11   16.04
  -1 -31  -8   -1.80   26.34
  -1 -31  -8   21.47   16.42
   1  31   8  -20.41   26.86
   1  31   8   13.31   37.20
  -1  31  -8   30.65   24.41
  -1  31  -8    7.01   19.80
   1 -31   9  279.30   49.15
   1 -31   9  228.60   27.54
  -1 -31  -9  249.50   30.53
  -1 -31  -9  239.50   28.03
   1  31   9  220.40   36.39
   1  31   9  164.80   40.06
  -1  31  -9  302.60   37.38
  -1  31  -9  235.00   29.77
   1 -31  10   49.62   21.21
   1 -31  10   45.88   42.97
  -1 -31 -10   -9.39   24.62
  -1 -31 -10   34.99   18.59
   1  31  10   41.51   39.97
   1  31  10   -1.95   36.58
  -1  31 -10   33.86   32.36
  -1  31 -10   41.05   25.74
   1 -31  11  -36.26   44.54
   1 -31  11   25.51   28.83
  -1 -31 -11   35.04   24.75
  -1 -31 -11  -18.92   34.24
   1  31  11   69.87   34.87
   1  31  11   13.04   30.93
  -1  31 -11   -8.83   25.56
  -1  31 -11  -26.11   27.22
   1 -32 -12  -45.80   35.06
   1 -32 -12  -16.57   23.36
  -1 -32  12  -17.45   24.91
  -1 -32  12   29.20   47.51
   1  32 -12  -12.31   27.06
   1  32 -12  -10.25   30.56
  -1  32  12  -41.21   44.08
  -1  32  12   30.66   40.83
   1 -32 -11    8.65   19.12
   1 -32 -11   43.49   26.59
  -1 -32  11   27.05   46.96
  -1 -32  11   50.13   22.54
   1  32 -11   14.60   21.96
   1  32 -11   18.19   29.36
  -1  32  11  -20.73   39.17
  -1  32  11   51.95   32.56
   1 -32 -10   76.69   24.91
   1 -32 -10   70.32   17.28
  -1 -32  10   48.76   51.87
  -1 -32  10   71.54   28.72
   1  32 -10   65.48   26.84
   1  32 -10   44.67   33.32
  -1  32  10   50.24   30.60
  -1  32  10   48.69   33.41
   1 -32  -9  -17.51   20.11
   1 -32  -9   19.82   25.09
  -1 -32   9    7.56   23.82
  -1 -32   9   16.65   43.02
   1  32  -9    1.16   33.01
   1  32  -9   -6.65   23.46
  -1  32   9   -6.63   35.50
  -1  32   9   -2.93   20.29
   1 -32  -8  111.30   25.73
   1 -32  -8  140.40   20.35
  -1 -32   8  145.90   23.30
  -1 -32   8   90.35   42.03
   1  32  -8   77.86   29.09
   1  32  -8  115.40   23.88
  -1  32   8   73.26   24.78
  -1  32   8   76.56   33.32
   1 -32  -7   29.02   21.68
   1 -32  -7   45.12   18.20
  -1 -32   7   12.70   22.27
  -1 -32   7   34.96   50.10
   1  32  -7   47.99   21.63
   1  32  -7   51.13   30.46
  -1  32   7   37.45   21.57
  -1  32   7  -38.83   33.00
   1 -32  -6   50.13   16.75
   1 -32  -6   94.73   22.17
  -1 -32   6   96.37   40.17
  -1 -32   6   77.35   22.82
   1  32  -6  112.70   23.13
   1  32  -6   97.91   30.91
  -1  32   6  117.70   34.96
  -1  32   6   81.74   20.94
   1 -32  -5    5.18   17.85
   1 -32  -5   -8.74   18.77
  -1 -32   5   39.00   34.68
  -1 -32   5    0.50   16.34
   1  32  -5    0.65   19.54
   1  32  -5   -9.63   29.63
  -1  32   5   -8.25   18.89
  -1  32   5  -22.82   31.57
   1 -32  -4  524.40   47.26
   1 -32  -4  679.80   60.01
  -1 -32   4  615.20   59.90
  -1 -32   4  562.70   48.65
  -1 -32   4  636.10   61.33
   1  32  -4  640.30   55.53
   1  32  -4  576.30   53.01
  -1  32   4  687.30   68.44
  -1  32   4  543.70   48.58
   1 -32  -3   56.53   18.36
   1 -32  -3   77.95   16.97
  -1 -32   3   25.99   21.92
  -1 -32   3   49.93   13.03
   1  32  -3   26.97   18.92
   1  32  -3   59.18   14.59
  -1  32   3   18.48   23.15
  -1  32   3   49.02   17.34
   1 -32  -2  237.60   30.02
  -1 -32   2  260.80   33.63
  -1 -32   2  223.30   23.21
   1  32  -2  170.80   24.95
   1  32  -2  156.10   19.05
  -1  32   2  142.50   27.04
  -1  32   2  243.40   33.56
  -1  32   2  153.20   20.90
   1 -32  -1   51.43   23.13
  -1 -32   1   27.78   24.61
  -1 -32   1   38.20   14.04
   1  32  -1   38.57   14.10
   1  32  -1   54.50   20.66
  -1  32   1   58.33   24.64
  -1  32   1   16.34   14.41
   1 -32   0  875.00   73.32
   1 -32   0  822.70   73.34
  -1 -32   0  847.50   70.91
  -1 -32   0  909.00   78.76
   1  32   0  853.70   74.31
   1  32   0  807.30   67.28
  -1  32   0  865.20   75.84
  -1  32   0  673.10   57.10
   1 -32   1  379.80   35.32
   1 -32   1  465.60   46.82
  -1 -32  -1  356.20   33.38
  -1 -32  -1  391.60   39.71
   1  32   1  286.40   29.02
  -1  32  -1  278.60   27.68
   1 -32   2   32.84   23.93
   1 -32   2   33.27   14.26
  -1 -32  -2   12.12   22.12
  -1 -32  -2   17.83   16.68
   1  32   2   13.24   19.73
   1  32   2   33.38   21.73
  -1  32  -2   57.68   14.39
   1 -32   3  109.20   27.99
   1 -32   3   81.47   26.13
   1 -32   3   79.85   15.97
  -1 -32  -3   81.30   28.03
  -1 -32  -3   82.64   22.01
   1  32   3   77.63   19.42
  -1  32  -3   75.06   16.57
  -1  32  -3  113.40   22.83
   1 -32   4  656.70   56.00
   1 -32   4  488.80   50.31
  -1 -32  -4  728.40   62.87
  -1 -32  -4  641.80   57.29
   1  32   4  597.30   53.17
   1  32   4  603.10   60.05
  -1  32  -4  528.40   48.72
  -1  32  -4  646.60   55.48
   1 -32   5   -1.34   11.39
   1 -32   5  -19.26   28.38
  -1 -32  -5   14.00   19.02
  -1 -32  -5   -7.51   20.21
   1  32   5    2.58   18.30
   1  32   5   45.73   33.82
  -1  32  -5   18.03   21.34
  -1  32  -5    9.24   16.99
   1 -32   6  233.30   26.31
  -1 -32  -6  230.80   30.64
  -1 -32  -6  297.70   30.50
   1  32   6  196.70   27.41
   1  32   6  175.80   34.59
  -1  32  -6  196.30   24.06
  -1  32  -6  253.60   32.09
   1 -32   7   43.57   17.79
   1 -32   7   59.52   34.87
  -1 -32  -7   10.97   19.03
  -1 -32  -7   43.40   25.36
   1  32   7    0.70   16.94
   1  32   7   40.20   32.23
  -1  32  -7   37.71   18.97
  -1  32  -7   39.87   24.17
   1 -32   8  149.10   24.22
[truncated: 2,126,561 more chars]
